# Supplementary material for: Primary care and cancer: an analysis of the impact and inequalities of the COVID-19 pandemic on patient pathways
Source: PubMed Central journal article supplement (PMC8948073; doi:10.1136/bmjopen-2021-059374), 2022-03-23
Supplement: bmjopen-2021-059374.draft_revisions.pdf [file bmjopen-2021-059374.draft_revisions.pdf]

# BMJ Open

BMJ Open is committed to open peer review. As part of this commitment we make the peer review history of every article we publish publicly available.

When an article is published we post the peer reviewers' comments and the authors' responses online. We also post the versions of the paper that were used during peer review. These are the versions that the peer review comments apply to.

The versions of the paper that follow are the versions that were submitted during the peer review process. They are not the versions of record or the final published versions. They should not be cited or distributed as the published version of this manuscript.

BMJ Open is an open access journal and the full, final, typeset and author-corrected version of record of the manuscript is available on our site with no access controls, subscription charges or pay-per-view fees (<http://bmjopen.bmj.com>).

If you have any questions on BMJ Open's open peer review process please email [info.bmjopen@bmj.com](mailto:info.bmjopen@bmj.com)

# BMJ Open

## Primary Care and Cancer: an analysis of the impact and inequalities of the COVID-19 pandemic on patient pathways

|                               |                                                                                                                                                                                                                                     |
|-------------------------------|-------------------------------------------------------------------------------------------------------------------------------------------------------------------------------------------------------------------------------------|
| Journal:                      | <i>BMJ Open</i>                                                                                                                                                                                                                     |
| Manuscript ID                 | bmjopen-2021-059374                                                                                                                                                                                                                 |
| Article Type:                 | Original research                                                                                                                                                                                                                   |
| Date Submitted by the Author: | 18-Nov-2021                                                                                                                                                                                                                         |
| Complete List of Authors:     | Watt, Toby; The Health Foundation, REAL Centre<br>Sullivan, Richard; King's College London<br>Aggarwal, Ajay; London School of Hygiene and Tropical Medicine Faculty of Public Health and Policy, Health Services Research & Policy |
| Keywords:                     | ONCOLOGY, PRIMARY CARE, COVID-19                                                                                                                                                                                                    |
|                               |                                                                                                                                                                                                                                     |

SCHOLARONE™  
Manuscripts

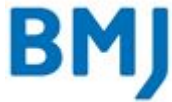

I, the Submitting Author has the right to grant and does grant on behalf of all authors of the Work (as defined in the below author licence), an exclusive licence and/or a non-exclusive licence for contributions from authors who are: i) UK Crown employees; ii) where BMJ has agreed a CC-BY licence shall apply, and/or iii) in accordance with the terms applicable for US Federal Government officers or employees acting as part of their official duties; on a worldwide, perpetual, irrevocable, royalty-free basis to BMJ Publishing Group Ltd ("BMJ") its licensees and where the relevant Journal is co-owned by BMJ to the co-owners of the Journal, to publish the Work in this journal and any other BMJ products and to exploit all rights, as set out in our [licence](#).

The Submitting Author accepts and understands that any supply made under these terms is made by BMJ to the Submitting Author unless you are acting as an employee on behalf of your employer or a postgraduate student of an affiliated institution which is paying any applicable article publishing charge ("APC") for Open Access articles. Where the Submitting Author wishes to make the Work available on an Open Access basis (and intends to pay the relevant APC), the terms of reuse of such Open Access shall be governed by a Creative Commons licence – details of these licences and which [Creative Commons](#) licence will apply to this Work are set out in our licence referred to above.

Other than as permitted in any relevant BMJ Author's Self Archiving Policies, I confirm this Work has not been accepted for publication elsewhere, is not being considered for publication elsewhere and does not duplicate material already published. I confirm all authors consent to publication of this Work and authorise the granting of this licence.

# Primary Care and Cancer: an analysis of the impact and inequalities of the COVID-19 pandemic on patient pathways

Authors: Toby Watt<sup>1,2</sup>, Richard Sullivan<sup>3</sup> and Ajay Aggarwal<sup>4</sup>

1. The Health Foundation, 8 Salisbury Sq., London, UK,

2. Department of Public Health, Environments and Society, London School of Hygiene and Tropical Medicine, 15-17 Tavistock Place, London, UK

3. School of Cancer and Pharmaceutical Sciences, King's College London, London, UK; Institute of Cancer Policy, King's College London, London, UK; Department of

Oncology, Guy's and St Thomas' NHS Foundation Trust, London, UK.

4. Department of Health Services Research and Policy, London School of Hygiene & Tropical Medicine, London, UK; Institute of Cancer Policy, King's College London,

London, UK; Department of Oncology, Guy's and St Thomas' NHS Foundation Trust, London, UK.

Corresponding author: Toby Watt, [toby.watt@health.org.uk](mailto:toby.watt@health.org.uk)

Word count: 3,995



## Abstract

### Objectives

We explore the routes to cancer diagnosis to further understanding of the inequality in the reduction in detection of new cancers since the start of the pandemic. We use different data sets to assess stages in the cancer pathway: primary care data for primary care consultations, routine and urgent referrals and published analysis of cancer registry data for appointments and first treatments.

### Setting

Primary and cancer care

### Participants

In this study we combine multiple data sets to perform a population-based cohort study on different areas of the cancer pathway. For primary care analysis, we use a random sample of 500,000 patients from the Clinical Practice Research Datalink (CPRD). Post-referral we perform a secondary data analysis on the Cancer Wait Times data and the NCRAS COVID-19 data equity pack.

### Outcome measures:

Primary care: consultation, urgent cancer referral and routine referral rates, then appointments following an urgent cancer referral, and first treatments for new cancer, for all and by quintile of patient's local area Index of Multiple Deprivation.

### Results

Primary care contacts and urgent cancer referrals fell by 12.4% (-12.6, -12.3) and 20.2% (-22.3, -18.1) respectively, while routine referrals have not recovered to pre-pandemic levels. Reductions in first treatments for newly diagnosed cancers are down 16.3% (-16.6, -15.9). The reduction in the number of two week wait referrals and first treatments for all cancer has been largest for those living in poorer areas, despite having a smaller reduction in primary care contact.

### Conclusions

Our results further evidence the strain on primary care and the presence of the inverse care law, and the dire need to address the inequalities so sharply brought into focus by the pandemic. We need to address the disconnect between the importance we place on the role of primary care and the resources we devote to it.

**Key Words:** Oncology, Primary Care, COVID-19

### Strengths and Limitations

- This study uses multiple data sets to analyse a complex multidisciplinary cancer pathway. Due to data limitations, we innovate in drawing from different data sets to analyse the impact of the pandemic on each stage of the route to diagnosis.
- We use an extremely rich primary care data set containing patient level primary care activity linked to patients' local area socioeconomic indicator.
- Our relatively small (500,000) patient sample is collected from a nationally representative sample of primary care registered patients. The data produces results that closely mirror the rates of consultation and urgent cancer referral per patient (and their reduction) produced in publicly available national data sets.

## INTRODUCTION

The COVID-19 pandemic has had a profound impact on UK's health system. Each part of the UK's National Health Service has been impacted in different ways, and we are still feeling many of the consequences of both the COVID-19 pandemic and the public health measures put in place to manage it (non-pharmaceutical interventions; NPI). Cancer is one of the most complicated diseases that the UK health system must manage, being responsible for over one in four UK deaths in 2019. Cancer outcomes are acutely sensitive to changes in social determinants, patient pathways and service provision. Delays in both diagnosis and treatment have significant impacts on patient outcomes(1,2). Pandemic related diagnostic delays, lack of capacity and downstream stage progression (to more advanced disease) are already being seen(3). In addition, the impact of the pandemic needs to be seen in the context of an already overstretched UK cancer care system pre-pandemic that was 'burning hot' even in normal times(4).

Primary care sits at the heart of the cancer patient pathway and is the most crucial interface for early diagnosis and referral to hospital-based care, in addition to their wider support of cancer patient undergoing and post treatment. As models of cancer care have evolved in light of both technical advances and an ageing co-morbid population primary care has become an increasingly important aspect of integrated cancer care and an expansion of GP roles in cancer care(5). On average 22.5% of patients diagnosed with cancer come via primary care, but this reflects wide site-specific variation from as little as 8.3% of breast cancer to 42% for bladder cancer(6) (Data table presented in Annex 1).

It is important to reflect that prior to the start of the COVID-19 pandemic primary care had seen significant declines in overall resourcing relative to the funding of the rest of the NHS and compared to growing levels of disease burden that is managed in primary care. In addition, there is growing evidence that primary care has been under greater pressure in more deprived areas, with higher levels of staff turnover(7), higher levels of complex multimorbidity(8), higher numbers of consultations(9) and lower levels of funding and fewer GPs per capita once levels of ill health are taken into account(10). These pressures on primary care, and a desire to correct them, have been recognised in the NHS Long Term Plan(11).

Thus, to understand the COVID-19's impact on primary care and the downstream impact on cancer outcomes we need to see that the pandemic arrived when the system that was already struggling to cope. Prior to COVID-19, the central role of primary care as agents of change in reducing inequalities had been the subject of much debate yet could do little in the face of political avoidance of health equity(12). Primary care had become a mirror on inequalities but also subject to significant pressures from these growing inequalities that had put practices in deprived populations under significant stress. Yet despite this, equity-oriented primary care reform in England in the mid-to-late 2000s may have helped to reduce socioeconomic inequality in health(13).

[Box]

COVID-19 was officially declared a pandemic by the WHO on 11 March 2020, and the UK announced its first full lockdown on 23<sup>rd</sup> March. In the following months UK NPI were eased, schools reopened in phases, non-essential shops reopened and in August the population were encouraged to eat out. Some restrictions were re-imposed in September and October, on the 5<sup>th</sup> of November 2020 a second brief national lockdown lasted until 2<sup>nd</sup> December. On the 6<sup>th</sup> of January a third national lockdown was introduced(14).

[End box]

It is now clear that the UK experience of the pandemic was one of the worst in the world, both in terms of excess mortality (both COVID-19 and non-COVID-19) and the impact of NPI (lockdowns) on both the ability of health services to continue provide care and the impact of messaging (stay at home) on patients' timely presentation for care(15). However, the overwhelming focus of impact studies on cancer care has been on hospital-based services, including diagnostics. Given primary care's central role in pathways to diagnosis and integrated cancer care, including survivorship there has been little insight around how overall changes in consultation rates impacted both routine and two week wait referrals as well as how this varied both in terms of site-specific cancers and as a consequence of socio-economic

1 inequalities. In this study we provide the first detailed analysis of primary care activity in relation to cancer patients  
2 during the pandemic with a particular focus on inequalities.

## 3 **METHODS**

### 4 **Study design, data sources and participants**

5 We perform a population-based cohort study using the following three separate sources.

#### 6 *Primary care data – CPRD Aurum*

7 Primary care electronic health records were obtained from the Clinical Practice Research Datalink (CPRD) database. We  
8 included patient records from 01/01/2016 to 31/01/2021. Pre-pandemic data were included to establish long-term  
9 trends and patterns of seasonality in primary care use and referrals to secondary care. Similar to recent analysis of the  
10 covid pandemic(16), our analysis focusses on comparing observed levels of activity to the expected from March 2020.

11 The CPRD Aurum database contains anonymised patient data from approximately 7% of the UK population and is  
12 broadly representative in terms of age, sex, and ethnicity(17).

13 The period of eligibility for study inclusion, which starts on the latest of the study start date (01/01/2016) or the  
14 patient's registration to their practice. A patient's period of eligibility ends on the earliest of leaving their practice, the  
15 end of data collection from their practice or their death. Primary care records from CPRD were linked to the deciled  
16 index of multiple deprivation (IMD) from 2015(18) of each patient's lower super output area (LSOA). 500,000 patients  
17 were randomly sampled from the CPRD population who were eligible for linkage within the defined study period. The  
18 patient records include information on consultations, patient demographic information, diagnoses, medication  
19 prescriptions, and referrals to secondary care.

#### 20 *Cancer wait times data*

21 Cancer waiting times (CWT) measure performance against the NHS Constitution Standards, as well as a number of other  
22 metrics. These measures are used by local and national organisations to monitor the timely delivery of services to  
23 patients, they are published quarterly by NHS Digital<sup>ii</sup>.

#### 24 *Cancer diagnosis by socioeconomic status - NCRAS Cancer data equity pack*

25 Data on cancer diagnosis by socioeconomic group was drawn from CADEAS and NCRAS which have two equity data  
26 packs presenting the latest national data on the number of urgent suspected two-week wait referrals and first definitive  
27 treatments for cancer(19). These data packs are produced based on the CWT data, with analysis from Hospital Episode  
28 Statistics (HES) and other sources outlined in their technical notes.

## 29 **Outcomes**

### 30 *CPRD Aurum*

31 We define consultations in CPRD data by a set of rules developed based on two variables in the consultations file<sup>iii</sup>  
32 ("EMIS® consultation source identifier" and "Consultation source code identifier"), combined with the type of staff that  
33 filled in the record. This method is an adaptation of the approach taken by Carey et al 2012 for CPRD Gold data (Annex  
34 2).

35 Using the observation file in CPRD Aurum, we were also able to identify where patients had influenza vaccinations. We  
36 look to exclude flu vaccines from our analysis on the basis that the programme was expanded in 2020/21 to achieve

37 <sup>i</sup> <https://www.gov.uk/government/statistics/english-indices-of-deprivation-2015>

38 <sup>ii</sup> <https://www.england.nhs.uk/statistics/statistical-work-areas/cancer-waiting-times/>

39 <sup>iii</sup> <https://cprd.com/primary-care>

1 maximum uptake<sup>iv</sup>. To help with the comparability of consultations in the two periods, we removed primary care  
2 appointments that included a flu vaccine.

3 We were able to identify vaccinations in CPRD Aurum which identifies observations related to vaccination. We then  
4 performed a string search for influenza, including notes that clearly referred to a health care professional administering  
5 a vaccine. A list of excluded terms is presented in Annex 3 with a summary of consultations including and excluding  
6 influenza vaccinations.  
7

8 Referrals in CPRD are categorized into routine and “urgent cancer”. Referrals from the ‘referral file’ are linked to  
9 patients, no additional data cleaning steps were taken in the analysis of referrals.  
10

### 11 *Cancer Wait Times*

12 The CWT data present monthly counts of patients who have been recorded as having been through each stage of the  
13 cancer diagnosis pathway that is held to a performance target (Annex 4).  
14

15 We include in our analysis: the number of patients that receive a first appointment following an urgent referral, the total  
16 number of patients receiving first treatments following a cancer diagnosis and the number of patients receiving first  
17 treatments following an urgent cancer referral from primary care.  
18  
19  
20

### 21 *Cancer diagnosis by socioeconomic status - NCRAS Cancer data equity pack*

22 The data show monthly counts, from January 2018 to January 2021 inclusive, broken down by tumour type and patient  
23 factors: deprivation, age, sex and ethnicity. The analysis presents the working day adjusted proportion compared to pre-  
24 pandemic levels.  
25  
26

### 27 **Patient and public involvement**

28 No patient involved  
29  
30

### 31 **Data analysis**

#### 32 *CPRD & CWT*

33 For both our primary care data and the CWT data we perform a linear regression of each outcome over time to estimate  
34 expected values for the post-pandemic period (end of March 2020 to end of January 2021), based on predicted values  
35 from the data pre pandemic:  
36  
37  
38

- 39 - in the case of CPRD Aurum outcomes this is weekly data from 01 January 2016 to 15 March 2020,
- 40 - for CWT outcomes this is monthly data from October 2009 to March 2020.  
41

42 To account for seasonality and time trends we include months as a categorical variable and time as a continuous  
43 variable, the approach taken by Carr et al.(16). In the case of weekly primary care data we observe large dips in activity  
44 in weeks that include bank holidays and include a categorical variable on the basis of the number of bank holidays in  
45 each week (in the winter holidays in England there is always one week with two bank holidays).  
46

47 When analysing primary care consultation rates by socioeconomics we adjust for population age. We do so when  
48 calculating the consultation rates by IMD quintile and weighting the sample according to the European Standard  
49 Population<sup>v</sup> (ESP).  
50

#### 51 *NCRAS equity data*

52  
53  
54  
55  
56

---

57 <sup>iv</sup> [https://www.england.nhs.uk/wp-content/uploads/2020/05/Letter\\_AnnualFlu\\_2020-21\\_20200805.pdf](https://www.england.nhs.uk/wp-content/uploads/2020/05/Letter_AnnualFlu_2020-21_20200805.pdf)

58 <sup>v</sup> <https://www.causesofdeath.org/docs/standard.pdf>

1 The analysis presented in the equity data pack compares new instances of first treatments in months during the  
2 pandemic (01 April 2020 – 31 Jan 2021) compared with the same months in 2019/20. The analysis includes a 95%  
3 confidence interval for the changes, based on rate ratios under an assumption that the population is the same in the  
4 pre-COVID-19 baseline and COVID-19 months. This is calculated using the exact method described in Breslow & Day  
5 1987, pp 93-95(20). The NCRAS equity data pack shows the high levels of heterogeneity in the impact of the COVID-19  
6 pandemic on different tumour locations<sup>vi</sup>. Our presentation of these data follows the same method but presents the  
7 cumulative difference for the period from April 2020 to the end of January compared with the previous 12 months.  
8  
9

## 10 RESULTS

### 11 Overall impact of the pandemic

12 Before the COVID-19 pandemic and the associated NPI, there was an average of 0.086 primary care consultations per  
13 person-week (03/03/2020 – 29/02/2020). This equates to 254 million appointments in primary care nationally. Primary  
14 care consultations (Figure 1 a) dropped rapidly to a low of 0.062 appointments per person-week in the week following  
15 29/03/2020, this was 66.2% lower than the predicted rate. Rates slowly recovered over the next 22 weeks and by the  
16 31/08/2020 were up to 99% of the baseline. In total there were 18.7 million fewer primary care consultations in the  
17 English NHS during this period. Primary care consultations again fell to below 90% of predicted levels in the third wave  
18 NPI starting on 06/01/2021, by the end of that month there were a further 8.2 million fewer consultations than  
19 expected. Between the start of the first NPI in March 2020 and the end of January 2021 there were 27.0 million fewer  
20 appointments than expected.  
21  
22

23 In the year prior to the pandemic, the average rate of urgent cancer (two week wait) referral was 0.00073 per person  
24 per week, equating to an estimated 2.1 million for the NHS in England (March 2019 to March 2020). Following the first  
25 NPI, urgent cancer referrals from primary care (Figure 1 b) fell to a nadir of 0.00023 by 29/03/2020 (29.7% of the  
26 predicted level). Urgent cancer referrals did not return to pre-pandemic baseline until the week following 23/08/2020  
27 equating to 303,016 estimated lost urgent cancer referrals over this period. There was a second fall in urgent cancer  
28 referrals from primary care in the winter to below 90% of the baseline following the third lockdown (around 0.00065  
29 referrals per person-week). This resulted in a further estimated 91,705 fewer urgent cancer referrals than expected.  
30 Between the start of the first NPI in March 2020 and the end of January 2021 there were 394,721 fewer urgent cancer  
31 referrals than expected.  
32  
33

34 Routine referrals however have shown a different trajectory in that their rates did not recover to pre-pandemic levels  
35 (Figure 1 c). As a share of predicted levels routine referrals had the greatest fall, dropping to around 16%  
36 of predicted rates for three weeks from the 05/04/2020. From then to the end of January the closest it came to  
37 predicted levels was 80.3% in the week flowing 13/09/2020. In January 2021 it had fallen back down to 60-70% of  
38 predicted rates. In the year before March 2020 there were an average of 0.0042 routine referrals per person-week from  
39 primary care, equivalent to an estimated 12.2 million for the NHS in England. Between the start of the first NPI in March  
40 2020 and the end of January 2021 there were 4.3 million fewer routine referrals than expected.  
41  
42  
43  
44  
45  
46  
47  
48  
49  
50  
51  
52  
53  
54  
55

---

56 <sup>vi</sup> The NCRAS data equity pack is different in its count and analysis of “all tumours” compared with the Cancer Wait Times Data, this  
57 is because the data are slightly different (cleaned and analysed by NCRAS). Results of our analysis with each data set are compared  
58 in Annex 7.  
59

*Table 1a: Observed post COVID-19 primary care activity (CPRD Aurum) 15 March 2020 – 30 January 2021*

|                                      | Observed rate | Expected rate | Percentage reduction (95% CI) | Estimated # missing from England population, n |
|--------------------------------------|---------------|---------------|-------------------------------|------------------------------------------------|
| Event rate per 100,000 person months |               |               |                               |                                                |
| Consultations excl flu vaccinations  | 31,996        | 36,517        | 12.4% (12.3, 12.6)            | 26,887,014                                     |
| Routine Referrals                    | 1,046         | 1,772         | 41.1% (40.4, 41.8)            | 4,317,710                                      |
| 2 Week Wait Referrals                | 268.0         | 335.8         | 20.2% (18.1, 22.3)            | 394,721                                        |

*Table 1b: Observed post COVID-19 cancer diagnostic activity (Cancer Wait Times), 01 April 2020 - 31 January 2021*

|                                                                               | Observed rate | Expected rate | Percentage reduction (95% CI) | Estimated # missing from England population, n |
|-------------------------------------------------------------------------------|---------------|---------------|-------------------------------|------------------------------------------------|
| Event rate per 100,000 person months                                          |               |               |                               |                                                |
| First consultant appointments following urgent referral from primary care     | 296.0         | 366.4         | 19.2% (19.1, 19.3)            | 398,192                                        |
| Incidence rate per 100,000 person months                                      |               |               |                               |                                                |
| First treatments for new cancer from the urgent primary care referral pathway | 21.4          | 25.5          | 16.1% (15.5, 16.8)            | 23,270                                         |
| First treatments for new cancer from the national screening pathway           | 1.6           | 3.5           | 53.2% (52.0, 54.3)            | 10,444                                         |
| First treatments for new cancer                                               | 39.7          | 47.4          | 16.3% (15.9, 16.6)            | 43,623                                         |

Table 1a summarises the missing appointments and referrals for the post-pandemic period. Since the start of the pandemic in March we have observed consultations rates (excluding flu vaccine appointments) that are 12.4% (C.I. 12.3%, 12.6%) lower than predicted by previous data: equivalent to 27 million appointments when adjusted to match the whole England population between 02/03/2020 and 30/01/2021. The number of referrals to secondary care per consultation has also fallen, with urgent cancer referrals 20.2% (C.I. 18.1%, 22.3%) and routine referrals 41.1% (C.I. 40.4%, 41.8%) lower than expected: this is an estimated 394,721 and 4.3 million missing urgent cancer and routine referrals respectively.

The knock-on effect of the reductions in patients' primary care appointments and referrals can be observed in the national CWT data. The number of first appointments with a cancer specialist following an urgent cancer referral has fallen by approximately the same amount as estimated for the referrals themselves: 19.2% (C.I. 19.1%, 19.3%). The number of cancer first treatments (following a diagnosis and decision to treat) was 16.3% (C.I. 15.9%, 16.6%) lower than expected, or 43,623 missing first treatments from 01/04/2020 - 31/01/2021<sup>vii</sup> (graphs of observed compared with expected are presented in Annex 6).

Urgent cancer referrals by site specific cancer from 01/04/2020 until 31/01/2021 showed significant heterogeneity from moderate reductions in urgent referrals for suspected breast (7.0% C.I. 6.6%, 7.5%) and gynaecological cancers (10.3% C.I. 9.7%, 10.9%), to 36.9% (C.I. 36.1%, 37.8%) and 27.2% (C.I. 26.7%, 27.7%) reduction in urgent referrals for lung and urological cancers, respectively (Figure 2). To show how pathway delays interface with reductions in cancer referrals we also examined reductions in first treatments for the same site-specific cancers over this period (Figure 2). Breast and urological cancers observed the greatest reduction in new first treatments: Breast fell by 24.8% (C.I. 23.6%, 25.9%) which equates to 10,042 missing treatments and urological by 24.1% (C.I. 23.2%, 25.2%) which equates to 12,086 missing treatments. Taken together these data reflect substantial delays in both diagnostic and treatment phases of the patient pathway.

<sup>vii</sup> Dates for the CWT and NCRAS analysis do not line up with the CPRD analysis because the latter is conducted weekly, not monthly.



## Inequalities in cancer diagnosis outcomes in the pandemic

There are inequalities in primary care use in England, with the people who live in the poorest areas have higher rates of consultation than those in richer areas once we adjust for age. The most deprived quintile was expected to have 41,702 consultations per 100,000 person-months, 15% more than the least deprived.

*Table 2: Observed post COVID-19 primary care activity (CPRD Aurum) by IMD quintile, actual and age-standardised*

|                                                             | 22 Mar 2020 - 30 Jan 2021 (Weekly) |               |                               |
|-------------------------------------------------------------|------------------------------------|---------------|-------------------------------|
|                                                             | Observed rate                      | Expected rate | Percentage reduction (95% CI) |
| Consultations per 100,000 person-months                     |                                    |               |                               |
| IMD Quintile - 1 (least deprived)                           | 32,015                             | 37,030        | 13.5% (13.2, 13.9)            |
| IMD Quintile - 2                                            | 32,490                             | 37,308        | 12.9% (12.6, 13.3)            |
| IMD Quintile - 3                                            | 33,479                             | 38,707        | 13.5% (13.2, 13.9)            |
| IMD Quintile - 4                                            | 32,143                             | 36,573        | 12.1% (11.8, 12.5)            |
| IMD Quintile - 5 (most deprived)                            | 33,361                             | 37,062        | 10.0% (9.6, 10.3)             |
| Consultations per 100,000 person-months (Age-standardised*) |                                    |               |                               |
| IMD Quintile - 1 (least deprived)                           | 31,216                             | 36,141        | 13.6% (13.3, 14.0)            |
| IMD Quintile - 2                                            | 32,244                             | 37,160        | 13.2% (12.9, 13.6)            |
| IMD Quintile - 3                                            | 33,886                             | 39,382        | 14% (13.6, 14.3)              |
| IMD Quintile - 4                                            | 34,683                             | 39,677        | 12.6% (12.3, 12.9)            |
| IMD Quintile - 5 (most deprived)                            | 37,487                             | 41,702        | 10.1% (9.8, 10.4)             |

\*Age-standardisation is performed according to the European Standard Population (ESP)

The reduction of consultations over the period 22/03/2020-30/01/2021 was smallest for those in most deprived areas. Their reduction in consultations for the non-age-standardised figures was 10.0% (C.I. 9.6%, 10.3%), while for the least deprived the reduction was 13.5% (C.I. 13.2%, 13.9%). Weekly levels of age-standardised consultations per person-week by IMD quintile are presented in Annex 8.

Despite a smaller reduction in primary care contacts, we observe the largest reduction in both urgent cancer referrals and first treatments for cancer for patients living in the most deprived areas. The NCRAS data equity pack presents the number of urgent cancer referrals and first cancer treatments by IMD quintile<sup>viii</sup>. Figure 3 shows the reduction in urgent cancer referrals and first treatments for newly diagnosed cancer by IMD quintile.

There was a greater percentage reduction in urgent cancer referrals for those living in the most deprived areas in England experienced a 17.6% (C.I. 17.2%, 18.0%) reduction between 01/03/2020 and 31/01/2021 compared with the same period 12 months before, while referrals for the least deprived quintile fell by proportionately less: 15.3% (C.I. 14.9%, 15.6%). This equates to a reduction of 61,469 referrals for the most deprived and 62,601 or the least: without adjusting for age, the most deprived quintile had a smaller proportion of the pre-pandemic urgent cancer referrals, with 349,640 referrals compared to 410,293 for the least deprived quintile from April 2019 to January 2020.

At the same time, rates of new treatment for cancer for the people living in the most deprived 20% of England experienced a 15.8% (C.I. 14.6%, 17.0%) reduction between 01/03/2020 and 31/01/2021 compared with the same

<sup>viii</sup> They do not age-standardise their results

1 period 12 months before (6,607 missing first treatments). The reduction for the least deprived was 12.6% (C.I. 11.5%,  
2 13.7%) which equates to 6,880 missing first treatments.

3 Despite having more access to primary care for patients in more deprived areas (10.1% reduction for most deprived  
4 compared to 13.6% for the least deprived), urgent cancer referrals and newly diagnosed cancers have been disrupted by  
5 the pandemic more for people living in poorer areas.  
6

## 7 **DISCUSSION**

8  
9 The coronavirus SARS-CoV-2 (COVID-19) pandemic has had a profound impact on the management of patients with  
10 cancer(21). The first national lockdown in March 2020 created a ripple of non-pharmaceutical interventions, including  
11 'stay at home' orders, diminished healthcare service provision and redistribution of healthcare to COVID-19 related care  
12 that has had a profound impact on cancer services(1,22). Whilst it was already known that there had been a substantial  
13 reduction in the number of overall cancer-related referrals(23,24) the quantification of this had been missing. Our  
14 findings, that primary care consultations in English NHS fell by 12.4% between January 2020 and January 2021 with  
15 urgent cancer referrals even more suppressed (20.2%), reflect how profound the pathway disruptions were for cancer  
16 patients. Furthermore, many cancers are picked up through the course of routine referrals from general practice for  
17 non-specific symptoms. The drop in routine referrals that we found - 4.3 million – over this period will inevitably  
18 translate into late-stage presentation and a substantial reduction in outcomes. This will include wider economic costs  
19 due to more expensive (late stage) treatment and productivity losses due to morbidity and premature mortality.  
20 However, the trajectory of the declines reflect not just changes to national policy in terms of NPI, but also knock-on  
21 effects around public behaviour, primary care staffing, downstream reductions in diagnostics and an overall increase in  
22 friction across all cancer pathways and systems.  
23

24 This reduction in cancer pathways through primary care needs to be put in the context of wider disruptions. The  
25 suspension of national cancer screening programmes meant that circa 2 million people were not screened for cancer  
26 through national programs(26,27). Moreover, delays in cancer diagnoses and treatments have consistently been  
27 associated with poorer outcomes(1,2). The COVID-19 pandemic has also exacerbated the worst 62-day cancer waiting  
28 time targets in the last decade where 1 of 4 patients urgently referred from primary care between April 2020 and  
29 January 2021 did not receive treatment within 62 days(24).  
30

31 In our analysis of urgent cancer referrals by site in relation to reductions seen in first treatments significant differences  
32 were seen. Urological cancers (testis, renal and urothelial) have been particularly impacted with greater than 25%  
33 decrease both in urgent referrals and first treatments. This suggests that outcomes will be particularly impacted in this  
34 group. Lung, skin and lower GI (colon and rectal) also experienced significant declines in urgent referrals. Breast cancer  
35 was the least impacted of all in terms of urgent referrals, but experienced a 25% reduction in first treatments, indicating  
36 that cancer's reliance on screening programmes, which have suffered yet more than urgent referrals as a result of the  
37 pandemic(24). Although it is likely that some cancer patients have already been 'lost' to the system i.e. died of COVID-  
38 19 or other non-COVID19 comorbidities, a significant number will now present with later stage disease.  
39

40 Our findings also reflect socioeconomic inequalities with more profound decrease in urgent cancer referrals and first  
41 treatments for the most deprived populations, despite relatively better preservation of consultation rates. This is  
42 unexpected and extremely worrying, indicating greater disruption to the diagnostic pathway for patients living in more  
43 deprived areas, whose cancer outcomes were typically worse than their less deprived counterparts pre-  
44 pandemic(28,29).  
45

## 46 **Limitations**

47 This study uses multiple data sets to analyse a complex and disjointed pathway. We include a primary care data set that  
48 uses a relatively small (500,000) patient sample. However, the CPRD data produces results that closely mirror the rates  
49 of consultation per patient (and their reduction) produced in NHS Digital's appointments data(25). In addition, the  
50 estimated reduction in urgent cancer referrals is close to those presented in the NCRAS's analysis of their cancer registry  
51



1 data (Table 1). It is not yet possible to link these data on a patient basis due to delays in data access and once possible  
2 further research would be illuminating.  
3  
4  
5  
6  
7  
8  
9  
10  
11  
12  
13  
14  
15  
16  
17  
18  
19  
20  
21  
22  
23  
24  
25  
26  
27  
28  
29  
30  
31  
32  
33  
34  
35  
36  
37  
38  
39  
40  
41  
42  
43  
44  
45  
46  
47  
48  
49  
50  
51  
52  
53  
54  
55  
56  
57  
58  
59  
60

For peer review only

## Conclusions

Our data reflects a disruption to a complex interaction of several systemic issues that place a great deal of impetus on the role of primary care in ensuring early diagnosis of cancer. Primary care were under strain pre-pandemic, with low levels of investment creating problems(30). Particularly areas of high deprivation general practice is under-funded and under-doctored relative to need(7,8,10).

Early cancer diagnosis requires concordance of each participant and mechanism - including patients' awareness and ability to present with cancer symptoms, the ability of GPs to detect and urgently refer possible cancer cases and sufficient diagnostic capacity (in terms of both workforce and equipment) to enable swift referrals and minimise delays to diagnosis and treatment.

Every one of these nodes on the pathway to early diagnosis has been affected by the pandemic and the government response. There are also new potential barriers to the pathway that have resulted, including decreases in health seeking behaviour, many appointments being conducted remotely, changes in routine referral guidelines, changes in the capacity of acute care. However, further work is required as there is currently little understanding and even less evidence about how much each disruption is ultimately impacting cancer pathways.

The impact of the pandemic on cancer shown here is concerning. However, what is more concerning is the unequal and inequitable impact on those worst off. Cancer as a disease area "*magnifies what we know to be true about the totality of the health care system. It exposes all its strengths and weaknesses*"(31). Our results further evidence the strain on primary care and the presence of the inverse care law(32), and the dire need to address the inequalities so sharply brought into focus by the pandemic. We need to address the disconnect between the importance we place on the role of primary care and the resources we devote to it.

### Figure legends:

Figure 1: Observed vs expected primary care activity, 01 Jan 2019 – 30 January 2021 (per person-week) (CPRD Aurum data) Panels: a. Consultations (excluding flu vaccinations), b. Urgent cancer (2 week wait) referrals from primary care, c. Routine referrals from primary care

Figure 2: Change in observed vs expected first treatments for new cancer and urgent cancer referrals by tumour location from NCRAS Cancer equity data pack (%), 01 Apr 2020 to 31 Jan 2021)

Figure 3: Percentage difference in observed and expected urgent cancer referrals and first treatments for cancer by IMD quintile (01 Apr 2020 – 31 Jan 2021)

**Contributors:** Data cleaning and analysis was conducted by TW. TW conceived the study with input from the coauthors and wrote the first draft. All the authors provided critical scholarly feedback on the manuscript. All the co-authors approved of the final version of the manuscript. TW and RS are the guarantors. The corresponding author attests that all listed authors meet authorship criteria and that no others meeting the criteria have been omitted.

**Competing interests:** None

**Funding:** This publication is funded through the UK Research and Innovation GCRF grant ES/P010962/1.

### Data Availability statement:

**The primary care activity data may be obtained from a third party and are not publicly available.** We used de-identified primary care data from the Clinical Practice Research Datalink (CPRD). For more information please visit: <https://www.cprd.com/Data-access>, enquiries can be emailed to [enquiries@cprd.gov.uk](mailto:enquiries@cprd.gov.uk). Scientific approval for this study was given by the CPRD Independent Scientific Advisory Committee (ISAC). The study was approved by the Independent Scientific Advisory Committee for CPRD research (20\_143).

**Other data sources are available in a public, open access repository:** Cancer Wait Times at <https://www.england.nhs.uk/statistics/statistical-work-areas/cancer-waiting-times/> and the NCRAS Cancer data equity pack is available at [http://www.ncin.org.uk/local\\_cancer\\_intelligence/cadeas](http://www.ncin.org.uk/local_cancer_intelligence/cadeas).

## References

1. Maringe C, Spicer J, Morris M, Purushotham A, Nolte E, Sullivan R, et al. The impact of the COVID-19 pandemic on cancer deaths due to delays in diagnosis in England, UK: a national, population-based, modelling study. *Lancet Oncol*. 2020;21(8).
2. Hanna TP, King WD, Thibodeau S, Jalink M, Paulin GA, Harvey-Jones E, et al. Mortality due to cancer treatment delay: systematic review and meta-analysis. *BMJ*. 2020;371.
3. Purushotham A, Roberts G, Haire K, Dodkins J, Harvey-Jones E, Han L, et al. The impact of national non-pharmaceutical interventions ('lockdowns') on the presentation of cancer patients. *Ecancermedalscience*. 2021;15.
4. Health at a Glance: Europe 2020 [Internet]. OECD; 2020 [cited 2021 Oct 14]. (Health at a Glance: Europe). Available from: [https://www.oecd-ilibrary.org/social-issues-migration-health/health-at-a-glance-europe-2020\\_82129230-en](https://www.oecd-ilibrary.org/social-issues-migration-health/health-at-a-glance-europe-2020_82129230-en)
5. Meiklejohn JA, Mimery A, Martin JH, Bailie R, Garvey G, Walpole ET, et al. The role of the GP in follow-up cancer care: a systematic literature review. Vol. 10, *Journal of Cancer Survivorship*. 2016.
6. PHE. Routes to Diagnosis [Internet]. National Cancer Registration and Analysis Service. [cited 2021 Oct 14]. Available from: [http://www.ncin.org.uk/publications/routes\\_to\\_diagnosis](http://www.ncin.org.uk/publications/routes_to_diagnosis)
7. Parisi R, Lau YS, Bower P, Checkland K, Rubery J, Sutton M, et al. Rates of turnover among general practitioners: A retrospective study of all English general practices between 2007 and 2019. Vol. 11, *BMJ Open*. 2021.
8. Head A, Fleming K, Kypridemos C, Schofield P, Pearson-Stuttard J, O'Flaherty M. Inequalities in incident and prevalent multimorbidity in England, 2004–19: a population-based, descriptive study. *Lancet Heal Longev*. 2021;2(8).
9. DHSC, ONS. Direct and Indirect health impacts of COVID-19 in England [Internet]. London; 2021 Sep [cited 2021 Oct 14]. Available from: [https://assets.publishing.service.gov.uk/government/uploads/system/uploads/attachment\\_data/file/1018698/S1373\\_Direct\\_and\\_Indirect\\_Health\\_Impacts\\_of\\_C19\\_Detailed\\_Paper\\_.pdf](https://assets.publishing.service.gov.uk/government/uploads/system/uploads/attachment_data/file/1018698/S1373_Direct_and_Indirect_Health_Impacts_of_C19_Detailed_Paper_.pdf)
10. Fisher R, Dunn P, Asaria M, Thorlby R. Level or not? Comparing general practice in areas of high and low socioeconomic deprivation in England. London; 2020 Sep.
11. NHS. NHS Long Term Plan Summary. *NHS Improv*. 2019;
12. Moscrop A. Health inequalities in primary care: Time to face justice. Vol. 62, *British Journal of General Practice*. 2012.
13. Cookson R, Mondor L, Asaria M, Kringos DS, Klazinga NS, Wodchis WP. Primary care and health inequality: Difference-in-difference study comparing England and Ontario. *PLoS One*. 2017;12(11).
14. IFG. Timeline of UK coronavirus lockdowns, March 2020 to March 2021 [Internet]. Institute for Government . 2021 [cited 2021 Oct 14]. Available from: <https://www.instituteforgovernment.org.uk/sites/default/files/timeline-lockdown-web.pdf>
15. Health and Social Care Committee & Science and Technology Committee. Coronavirus: lessons learned to date [Internet]. London; 2021 Oct [cited 2021 Oct 14]. Available from: <https://committees.parliament.uk/work/657/coronavirus-lessons-learnt/news/157991/coronavirus-lessons->

learned-to-date-report-published/

16. Carr MJ, Steeg S, Webb RT, Kapur N, Chew-Graham CA, Abel KM, et al. Effects of the COVID-19 pandemic on primary care-recorded mental illness and self-harm episodes in the UK: a population-based cohort study. *Lancet Public Heal*. 2021;6(2).
17. Herrett E, Gallagher AM, Bhaskaran K, Forbes H, Mathur R, Staa T van, et al. Data Resource Profile: Clinical Practice Research Datalink (CPRD). *Int J Epidemiol*. 2015;44(3).
18. Padmanabhan S, Carty L, Cameron E, Ghosh RE, Williams R, Strongman H. Approach to record linkage of primary care data from Clinical Practice Research Datalink to other health-related patient data: overview and implications. *Eur J Epidemiol*. 2019;34(1).
19. NHS, PHE. The Cancer Alliance Data, Evaluation and Analysis Service [Internet]. National Cancer Registration and Analysis Service: Local Cancer Intelligence. 2021 [cited 2021 Oct 14]. Available from: [http://www.ncin.org.uk/local\\_cancer\\_intelligence/cadeas#covid-19](http://www.ncin.org.uk/local_cancer_intelligence/cadeas#covid-19)
20. Breslow NE, Day NE. Statistical methods in cancer research. Volume II--The design and analysis of cohort studies. IARC scientific publications. 1987.
21. Raymond E, Thieblemont C, Alran S, Faivre S. Impact of the COVID-19 Outbreak on the Management of Patients with Cancer. Vol. 15, Targeted Oncology. 2020.
22. UK Government. Staying at home and away from others (social distancing) [Internet]. Cabinet Office. 2020 [cited 2021 Oct 29]. Available from: <https://www.gov.uk/government/publications/full-guidance-on-staying-at-home-and-away-from-others>
23. Morris EJA, Goldacre R, Spata E, Mafham M, Finan PJ, Shelton J, et al. Impact of the COVID-19 pandemic on the detection and management of colorectal cancer in England: a population-based study. *Lancet Gastroenterol Hepatol*. 2021;6(3).
24. Cancer Waiting Times Team: NHS England and NHS Improvement. Cancer Wait Times Statistics [Internet]. NHS England. 2021 [cited 2021 Oct 25]. Available from: <https://www.england.nhs.uk/statistics/statistical-work-areas/cancer-waiting-times/>
25. NHS. Appointments in General Practice - September 2021 [Internet]. NHS Digital. 2021 [cited 2021 Nov 16]. Available from: <https://digital.nhs.uk/data-and-information/publications/statistical/appointments-in-general-practice>
26. Sud A, Torr B, Jones ME, Broggio J, Scott S, Loveday C, et al. Effect of delays in the 2-week-wait cancer referral pathway during the COVID-19 pandemic on cancer survival in the UK: a modelling study. *Lancet Oncol*. 2020;21(8).
27. Greenwood E, Swanton C. Consequences of COVID-19 for cancer care — a CRUK perspective. Vol. 18, Nature Reviews Clinical Oncology. 2021.
28. Coleman MP, Rachet B, Woods LM, Mitry E, Riga M, Cooper N, et al. Trends and socioeconomic inequalities in cancer survival in England and Wales up to 2001. *Br J Cancer*. 2004;90(7).
29. Cancer Research UK. Cancer incidence for all cancers combined: cancer incidence by deprivation [Internet]. 2020 [cited 2021 Oct 14]. Available from: <https://www.cancerresearchuk.org/health-professional/cancer-statistics/incidence/all-cancers-combined#heading-Three>
30. Roland M, Everington S. Tackling the crisis in general practice. *BMJ*. 2016;
31. Levit LA, Balogh EP, Nass SJ, Ganz PA. Delivering high-quality cancer care: Charting a new course for a system in crisis. *Delivering High-Quality Cancer Care: Charting a New Course for a System in Crisis*. 2014.
32. Tudor Hart J. THE INVERSE CARE LAW. *Lancet*. 1971;297(7696).

## Key messages

- Primary care is key part of the pathway for early cancer diagnosis through both routine and 2ww referrals
- Cancer diagnosis rates have experienced a sustained fall since the start of the COVID-19 pandemic and introduction of non-pharmaceutical interventions (NPIs) 'lockdowns'.
- The fall in urgent cancer referral is larger than the fall in primary care contacts, implying that the content of consultations has shifted away from potential cancer diagnosis.
- Despite having a smaller reduction in primary care contact through the pandemic, patients living in poorer areas have had larger reductions in urgent cancer referrals and first treatments for new cancer.
- Government, patients and primary care staff must work together to catch up on missing diagnosis.
- Resilience in primary care is key for the cancer diagnosis pathway and must be developed for future disruptions, particularly in poorer areas where care is more complex.

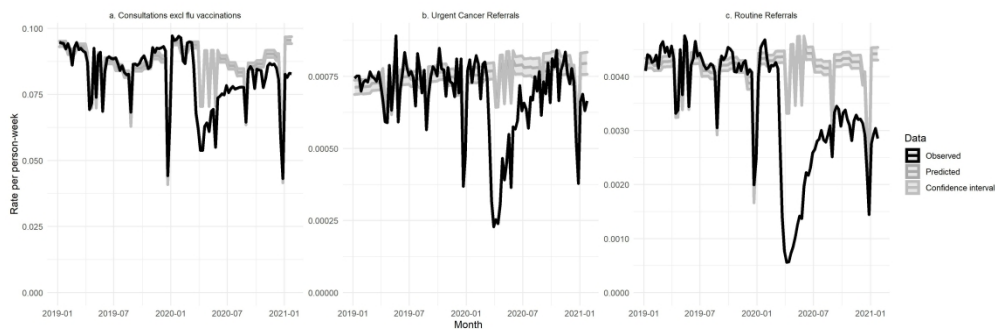

Figure 1: Observed vs expected primary care activity, 01 Jan 2019 – 30 January 2021 (per person-week) (CPRD Aurum data) Panels: a. Consultations (excluding flu vaccinations), b. Urgent cancer (2 week wait) referrals from primary care, c. Routine referrals from primary care

381x127mm (300 x 300 DPI)

1  
2  
3  
4  
5  
6  
7  
8  
9  
10  
11  
12  
13  
14  
15  
16  
17  
18  
19  
20  
21  
22  
23  
24  
25  
26  
27  
28  
29  
30  
31  
32  
33  
34  
35  
36  
37  
38  
39  
40  
41  
42  
43  
44  
45  
46  
47  
48  
49  
50  
51  
52  
53  
54  
55  
56  
57  
58  
59  
60

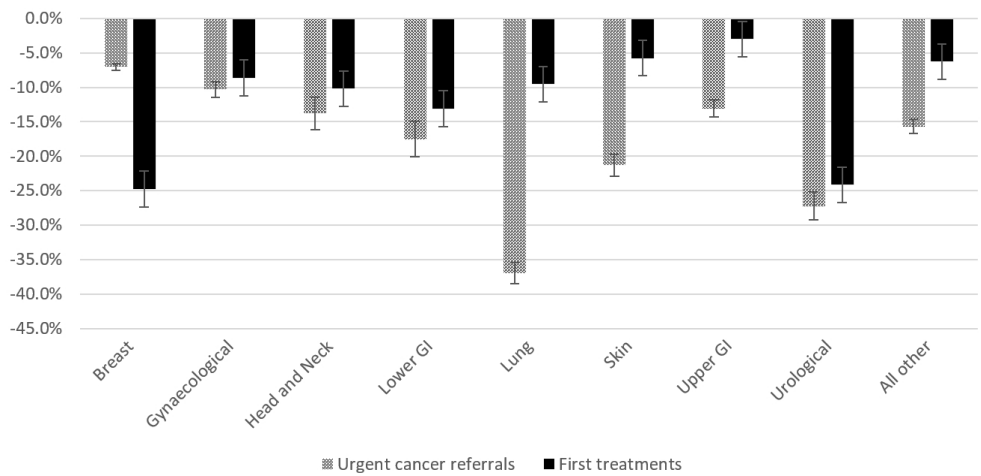

Figure 2: Change in observed vs expected first treatments for new cancer and urgent cancer referrals by tumour location from NCRAS Cancer equity data pack (% , 01 Apr 2020 to 31 Jan 2021)

720x351mm (47 x 47 DPI)

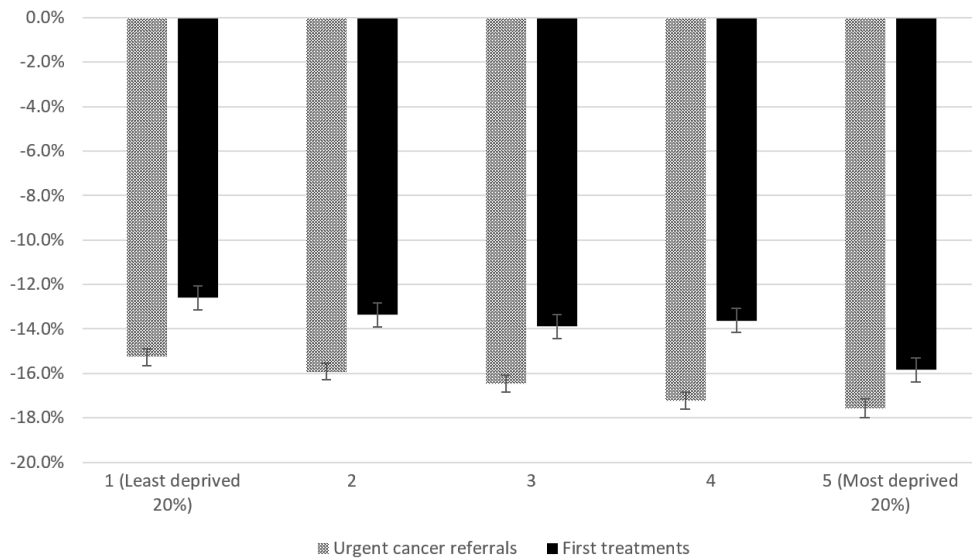

Figure 3: Percentage difference in observed and expected urgent cancer referrals and first treatments for cancer by IMD quintile (01 Apr 2020 – 31 Jan 2021)

698x403mm (47 x 47 DPI)



## Annex 1: NCRAS Analysis of routes to diagnosis

Table 1 NCRAS analysis of route to diagnosis in 2017

|                  | Count   | Screen | TWW   | GP referral | Other outpatient | Inpatient elective | Emergency | DCO  | Unknown |
|------------------|---------|--------|-------|-------------|------------------|--------------------|-----------|------|---------|
| All (excl. NMSC) | 305,682 | 6.1%   | 38.6% | 22.5%       | 9.0%             | 1.8%               | 18.8%     | 0.1% | 3.1%    |
| Testis           | 1,854   |        | 61.8% | 13.6%       | 9.2%             | 2.3%               | 9.9%      | 0.0% | 3.2%    |
| Uterus           | 7,862   |        | 58.5% | 24.8%       | 5.6%             | 0.7%               | 7.4%      | 0.1% | 2.9%    |
| Prostate         | 41,201  |        | 53.2% | 28.2%       | 7.0%             | 1.3%               | 6.8%      | 0.1% | 3.4%    |
| Breast cancer    | 53,123  | 34.1%  | 48.0% | 8.3%        | 2.7%             | 0.2%               | 3.4%      | 0.1% | 3.2%    |
| Oesophagus       | 7,569   |        | 46.3% | 18.1%       | 6.8%             | 8.5%               | 18.1%     | 0.1% | 2.1%    |
| Head and neck    | 12,865  |        | 46.1% | 28.1%       | 14.7%            | 1.4%               | 6.8%      | 0.1% | 2.8%    |
| Colorectal       | 34,825  | 9.9%   | 35.8% | 20.3%       | 7.0%             | 3.1%               | 21.5%     | 0.1% | 2.3%    |
| Stomach          | 5,142   |        | 32.5% | 21.6%       | 7.1%             | 6.3%               | 30.0%     | 0.1% | 2.4%    |
| Bladder          | 17,056  |        | 30.2% | 42.0%       | 12.4%            | 1.6%               | 12.0%     | 0.1% | 1.6%    |
| Kidney           | 9,298   |        | 30.1% | 28.9%       | 16.4%            | 1.7%               | 19.7%     | 0.1% | 3.1%    |
| Lung             | 38,906  |        | 26.9% | 23.2%       | 14.1%            | 1.6%               | 31.5%     | 0.1% | 2.7%    |
| Pancreas         | 8,829   |        | 21.7% | 21.2%       | 9.8%             | 2.5%               | 41.9%     | 0.3% | 2.7%    |
| Liver            | 4,975   |        | 17.2% | 25.6%       | 12.7%            | 1.8%               | 37.6%     | 0.3% | 4.7%    |
| Haematological   | 7,377   |        | 14.5% | 32.2%       | 8.4%             | 2.6%               | 35.1%     | 0.1% | 7.2%    |
| Cervix           | 23,569  | 39.6%  | 2.7%  | 33.6%       | 8.0%             | 3.0%               | 1.9%      | 0.0% | 11.3%   |
| Brain            | 5,116   |        | 1.5%  | 22.1%       | 24.4%            | 2.6%               | 45.7%     | 0.1% | 3.7%    |

## Annex 2: Consultation definition

CPRD Aurum data dictionary sets out the structure of the data. Within the consultation file there are two variables one can use to identify whether a primary care contact, rather than an administrative note ("EMIS® consultation source identifier" and "Consultation source code identifier").

The EMIS consultation source identifier is the primary variable used. We include the following observations of this variable:

Acute visit, Casualty attendance, Clinic, Emergency appointment, Emergency consultation, Enterprise consultation, Face to face consultation, Follow-up/routine visit, Gp surgery, Home visit, Home visit note, Main surgery, Nursing home, Nursing home visit note, Online services message, Other, Residential home, Residential home visit note, Same day appointment, Surgery consultation, Telephone encounter, Urgent consultation, Walk-in centre, Walk-in clinic

We also include instances where EMIS consultation source identifier is "awaiting review" and the Consultation source code identifier is in the following list:

1  
2  
3 Consultation, visit, seen in gp unit, seen in private clinic, seen in rapid access clinic at gp surgery, seen in urgent care centre, online  
4 communication.  
5

6 We then further exclude records on the basis of the category of staff responsible for the record. The “[Job category](#)” variable from  
7 the staff file, linked by the consultation id is used. We only include as a consultation records filled out by GPs, doctors, nurses and  
8 other health care professionals as defined in CPRD’s numerical codes listed below:  
9

10 GP – 4, 5, 15, 24, 31, 181, 183

11 Dr – 1, 41, 91, 116, 119, 121, 126, 173, 177, 197

12 Nurse – 8, 9, 27, 33, 47, 48, 50, 55, 59, 60, 61, 111

13 Other healthcare professional - 2, 3, 6, 7, 10:14, 16, 17, 34:37, 42, 43, 52, 54, 58, 62:65, 68, 72, 73, 77, 80, 82, 83, 86:89, 94, 95, 97,  
14 100:102, 105, 106, 112:114, 118, 122, 125, 127, 131, 135, 136, 138, 141, 142, 145, 148, 149, 154, 156, 158, 168, 185, 186, 188, 189,  
15 204, 208  
16  
17

18 In Table A2.1 we present the CPRD Aurum Staff Category list.  
19

20 In Table A2.2 we present the total number of consultations identified from 01 January 2016 to 31 January 2021, the count with each  
21 combination of staff category, “EMIS® consultation source identifier” and “Consultation source code identifier” in table y we show  
22 the count of records that were excluded, highlighting those that were excluded on the basis of staff category, not the consultation  
23 file description variables.  
24

25 Table A2.1: CPRD Aurum Staff Job Categories  
26

|                                                     |                                            |
|-----------------------------------------------------|--------------------------------------------|
| 27 1 Consultant                                     | 51 Helper/Assistant                        |
| 28 2 Hospital Practitioner                          | 52 Community Mental Health Nurse           |
| 29 3 Clinical Medical Officer                       | 53 Senior Administrator                    |
| 30 4 General Medical Practitioner                   | 54 Technician - Healthcare Scientists      |
| 31 5 Salaried General Practitioner                  | 55 Associate Practitioner - Nurse          |
| 32 6 Midwife - Sister/Charge Nurse                  | 56 Senior Manager                          |
| 33 7 Midwife                                        | 57 Community Administrator                 |
| 34 8 Community Practitioner                         | 58 Associate Specialist                    |
| 35 9 Community Nurse                                | 59 Student Practice Nurse                  |
| 36 10 Chiropodist/Podiatrist                        | 60 Nurse Manager                           |
| 37 11 Dietitian                                     | 61 Sister/Charge Nurse                     |
| 38 12 Pharmacist                                    | 62 Psychotherapist                         |
| 39 13 Clinical Psychologist                         | 63 Osteopath                               |
| 40 14 Health Care Support Worker                    | 64 Social Care Support Worker              |
| 41 15 Associate Practitioner - General Practitioner | 65 Assistant Psychologist                  |
| 42 16 Counsellor                                    | 66 Officer                                 |
| 43 17 Phlebotomist                                  | 67 Technician - Admin & Clerical           |
| 44 18 Clerical Worker                               | 68 Psychiatrist                            |
| 45 19 Manager                                       | 69 Health Records Clerk                    |
| 46 20 Analyst                                       | 70 Desktop Support Technician              |
| 47 21 System Administrator                          | 71 Dispenser                               |
| 48 22 Desktop Support Administrator                 | 72 Clinical Assistant                      |
| 49 23 System Worker                                 | 73 Practitioner                            |
| 50 24 GP Registrar                                  | 74 Information Officer                     |
| 51 25 Medical Student                               | 75 Network Administrator                   |
| 52 26 Other Community Health Service - Admin Clerk  | 76 Chaplain                                |
| 53 27 Specialist Nurse Practitioner                 | 77 Student Physiotherapist                 |
| 54 28 Receptionist                                  | 78 Paramedic Specialist Practitioner       |
| 55 29 Secretary                                     | 79 Clinical Team Manager                   |
| 56 30 Medical Secretary                             | 80 Physiotherapist Specialist Practitioner |
| 57 31 Sessional GP                                  | 81 Helpdesk Technician                     |
| 58 32 Clinical Application Administrator            | 82 Radiographer                            |
| 59 33 Nurse Consultant                              | 83 Other Community Health Service          |
| 60 34 Physiotherapist                               | 84 Call Operator                           |

1  
2  
3  
4  
5  
6  
7  
8  
9  
10  
11  
12  
13  
14  
15  
16  
17  
18  
19  
20  
21  
22  
23  
24  
25  
26  
27  
28  
29  
30  
31  
32  
33  
34  
35  
36  
37  
38  
39  
40  
41  
42  
43  
44  
45  
46  
47  
48  
49  
50  
51  
52  
53  
54  
55  
56  
57  
58  
59  
60

35 Specialist Practitioner  
36 Healthcare Assistant  
37 Medical Technical Officer - Pharmacy  
38 Health Records Administrator  
39 Helpdesk Administrator  
40 Appointments Clerk  
41 Senior House Officer  
42 Social Worker  
43 Trainee Practitioner  
44 Network Technician  
45 Clinical Coder  
46 Medical Records Clerk  
47 Staff Nurse  
48 Enrolled Nurse  
49 Multi Therapist  
50 Nursery Nurse

85 Community Worker (children)  
86 Paramedic Consultant  
87 Associate Practitioner  
88 Modern Matron  
89 Asst. Clinical Medical Officer  
90 Community Team Manager  
91 Specialist Registrar  
92 Chiropodist/Podiatrist Manager  
93 Radiographer - Therapeutic, Manager  
94 Optometrist  
95 Assistant Practitioner  
96 Community Learning Disabilities Nurse  
97 Technician - Additional Clinical Services  
98 Student Health Visitor  
99 Interpreter  
100 Medical Technical Officer

For peer review only

|    |                                                    |                                                         |
|----|----------------------------------------------------|---------------------------------------------------------|
| 1  |                                                    |                                                         |
| 2  |                                                    |                                                         |
| 3  | 101 Midwife - Specialist Practitioner              |                                                         |
| 4  | 102 Occupational Therapist                         |                                                         |
| 5  | 103 Chief Executive                                |                                                         |
| 6  | 104 Audit Manager                                  | 151 Finance Director                                    |
| 7  | 105 Paramedic                                      | 152 Senior social worker (adults)                       |
| 8  | 106 Physiotherapist Consultant                     | 153 Student Midwife                                     |
| 9  | 107 Availability Monitor                           | 154 Radiologist                                         |
| 10 | 108 Medical Laboratory Assistant                   | 155 Ward Manager                                        |
| 11 | 109 Gateway Worker                                 | 156 Midwife - Manager                                   |
| 12 | 110 Medical Records Manager                        | 157 Waiting List Manager                                |
| 13 | 111 Student Nurse - Adult Branch                   | 158 Radiographer - Diagnostic, Specialist Practitioner  |
| 14 | 112 Audiologist                                    | 159 Biomedical Scientist                                |
| 15 | 113 Radiographer - Diagnostic                      | 160 Board Level Director                                |
| 16 | 114 Therapist                                      | 161 Non Executive Director                              |
| 17 | 115 Student District Nurse                         | 162 Nursing Cadet                                       |
| 18 | 116 House Officer - Post Registration              | 163 Porter                                              |
| 19 | 117 Speech & Language Therapist                    | 164 Social services care manager (adults)               |
| 20 | 118 Dietitian Specialist Practitioner              | 165 Student Psychotherapist                             |
| 21 | 119 Trust Grade Doctor - SHO level                 | 166 Orthoptist                                          |
| 22 | 120 Director of Public Health                      | 167 Clinical Director - Medical                         |
| 23 | 121 Staff Grade                                    | 168 Approved Social Worker                              |
| 24 | 122 Patient Welfare Officer                        | 169 Student Community Mental Health Nurse               |
| 25 | 123 Occupational Therapy Specialist Practitioner   | 170 Other Executive Director                            |
| 26 | 124 Technician - PS&T                              | 171 Student Orthoptist                                  |
| 27 | 125 Chiropodist/Podiatrist Consultant              | 172 Childcare Co-ordinator                              |
| 28 | 126 Trust Grade Doctor - Career Grade level        | 173 House Officer - Pre Registration                    |
| 29 | 127 Student Community Practitioner                 | 174 SODP                                                |
| 30 | 128 Healthcare Scientist                           | 175 Outpatient Manager                                  |
| 31 | 129 Waiting List Clerk                             | 176 Medical Director                                    |
| 32 | 130 Clinical Director                              | 177 Trust Grade Doctor - Specialist Registrar level     |
| 33 | 131 Pre-reg Pharmacist                             | 178 Senior Clinical Medical Officer                     |
| 34 | 132 Mental Health Act Administrator                | 179 Consultant Healthcare Scientist                     |
| 35 | 133 Ward Clerk                                     | 180 Reporting Radiographer                              |
| 36 | 134 Support, Time, Recovery Worker                 | 181 Locum GP                                            |
| 37 | 135 Art Therapist Specialist Practitioner          | 182 Researcher                                          |
| 38 | 136 Physiotherapist Manager                        | 183 Assistant GP                                        |
| 39 | 137 Healthcare Cadet                               | 184 Special salary scale in Public Health Medicine      |
| 40 | 138 Dietitian Consultant                           | 185 Advanced Practitioner                               |
| 41 | 139 Orthoptist Manager                             | 186 Health Visitor                                      |
| 42 | 140 Social work assistant (mental health)          | 187 Dental Assistant Clinical Director                  |
| 43 | 141 Chiropodist/Podiatrist Specialist Practitioner | 188 Other Community Health Service - Social Care Worker |
| 44 | 142 Student Technician                             | 189 Physician Assistant                                 |
| 45 | 143 Complaints Investigator                        | 190 Deputising Doctor                                   |
| 46 | 144 Trainee Scientist                              | 191 Student Occupational Health Nurse                   |
| 47 | 145 Radiographer - Diagnostic, Manager             | 192 Senior social worker (mental health)                |
| 48 | 146 Social services care manager (mental health)   | 193 Regional Dental Officer                             |
| 49 | 147 Dietitian Manager                              | 194 Trainer                                             |
| 50 | 148 Midwife - Consultant                           | 195 Cytoscreener                                        |
| 51 | 149 Art Therapist Consultant                       | 196 Chair                                               |
| 52 | 150 Paramedic Manager                              | 197 Trust Grade Doctor - House Officer level            |
| 53 | 201 Healthcare Science Assistant                   | 198 Art Therapist                                       |
| 54 | 202 Social work assistant (adults)                 | 199 Multi Therapist Specialist Practitioner             |
| 55 | 203 Social work team manager (adults)              | 200 Drama Therapist                                     |
| 56 |                                                    |                                                         |
| 57 |                                                    |                                                         |
| 58 |                                                    |                                                         |
| 59 |                                                    |                                                         |
| 60 |                                                    |                                                         |

1  
2  
3 204 Intermediate Care worker  
4 205 Student Occupational Therapist  
5 206 Student Dietitian  
6 207 Healthcare Science Associate  
7 208 Child Protection worker  
8 209 Professor  
9 210 General Dental Practitioner  
10 211 Student School Nurse  
11 212 Occupational Therapist Consultant  
12 213 Intermediate Care staff  
13 214 Home help  
14 215 Art, Music & Drama Student  
15 216 Specialist Healthcare Scientist  
16 217 Social Services information manager  
17  
18  
19  
20  
21  
22  
23  
24  
25  
26  
27  
28  
29  
30  
31  
32  
33  
34  
35

36 Table A2.2: Number of observations by EMIS® consultation source identifier, Consultation source code identifier and Staff Job  
37 Category, with an indicator for whether it was included as a consultation: Include: 1 = Include, 0 = Exclude, "Excl. job title" =  
38 Excluded on the basis of job title.  
39

| Include | Staff Job Category  | Consultation source code identifier | EMIS consultation source identifier | Count     |
|---------|---------------------|-------------------------------------|-------------------------------------|-----------|
| 1       | gp                  | gp surgery                          | gp surgery                          | 3,119,080 |
| 1       | nurse               | gp surgery                          | gp surgery                          | 1,692,606 |
| 1       | gp                  | telephone consultation              | telephone consultation              | 1,471,946 |
| 1       | other care provider | gp surgery                          | gp surgery                          | 977,067   |
| 1       | nurse               | telephone consultation              | telephone consultation              | 196,665   |
| 1       | gp                  | telephone call to a patient         | telephone call to a patient         | 108,025   |
| 1       | gp                  | home visit note                     | home visit note                     | 83,600    |
| 1       | other care provider | telephone consultation              | telephone consultation              | 81,980    |
| 1       | nurse               | telephone call to a patient         | telephone call to a patient         | 32,423    |
| 1       | gp                  | face to face consultation           | face to face consultation           | 25,435    |
| 1       | nurse               | home visit note                     | home visit note                     | 24,174    |
| 1       | other care provider | telephone call to a patient         | telephone call to a patient         | 23,194    |
| 1       | gp                  | gp surgery                          | surgery consultation                | 22,756    |

|    |   |            |                                   |                               |        |
|----|---|------------|-----------------------------------|-------------------------------|--------|
| 1  |   |            |                                   |                               |        |
| 2  |   |            |                                   |                               |        |
| 3  |   |            |                                   |                               |        |
| 4  | 1 | gp         | nursing home visit note           | nursing home visit note       | 21,357 |
| 5  | 1 | nurse      | face to face consultation         | face to face consultation     | 17,580 |
| 6  | 1 | gp         | enterprise consultation           | enterprise consultation       | 14,904 |
| 7  | 1 | gp         | telephone call from a patient     | telephone call from a patient | 13,062 |
| 8  | 1 | gp         | routine consultation              | surgery consultation          | 11,668 |
| 9  |   | other care |                                   |                               |        |
| 10 | 1 | provider   | home visit note                   | home visit note               | 10,853 |
| 11 |   |            | provision of general practitioner |                               |        |
| 12 | 1 | gp         | intermediate care                 | gp surgery                    | 10,441 |
| 13 | 1 | gp         | emergency consultation            | emergency consultation        | 10,351 |
| 14 |   |            | residential home visit note       | residential home visit note   |        |
| 15 | 1 | gp         |                                   |                               | 9,579  |
| 16 |   | other care |                                   |                               |        |
| 17 | 1 | provider   | face to face consultation         | face to face consultation     | 9,350  |
| 18 | 1 | gp         | emergency appointment             | emergency appointment         | 8,687  |
| 19 | 1 | gp         | urgent consultation               | urgent consultation           | 8,155  |
| 20 | 1 | gp         | walk-in clinic                    | walk-in clinic                | 7,908  |
| 21 | 1 | dr         | gp surgery                        | gp surgery                    | 7,654  |
| 22 |   |            | other note                        | other                         |        |
| 23 | 1 | gp         |                                   |                               | 7,520  |
| 24 | 1 | gp         | face to face consultation         | surgery consultation          | 6,932  |
| 25 | 1 | nurse      | gp surgery                        | surgery consultation          | 5,318  |
| 26 | 1 | gp         | seen in gp unit                   | surgery consultation          | 4,687  |
| 27 |   |            | consultation via video conference | awaiting review               |        |
| 28 | 1 | gp         |                                   |                               | 4,653  |
| 29 | 1 | nurse      | enterprise consultation           | enterprise consultation       | 4,460  |
| 30 |   | other care | provision of general practitioner |                               |        |
| 31 | 1 | provider   | intermediate care                 | gp surgery                    | 4,369  |
| 32 | 1 | gp         | clinic note                       | surgery consultation          | 3,823  |
| 33 | 1 | nurse      | residential home visit note       | residential home visit note   | 3,612  |
| 34 | 1 | nurse      | clinic note                       | clinic                        | 3,585  |
| 35 |   |            | nursing home visit note           | nursing home visit note       |        |
| 36 | 1 | nurse      |                                   |                               | 3,528  |
| 37 | 1 | nurse      | face to face consultation         | surgery consultation          | 3,442  |
| 38 | 1 | gp         | online communication              | awaiting review               | 3,410  |
| 39 |   | other care |                                   |                               |        |
| 40 | 1 | provider   | other note                        | other                         | 3,406  |
| 41 |   | other care |                                   |                               |        |
| 42 | 1 | provider   | seen in gp unit                   | gp surgery                    | 2,781  |
| 43 | 1 | gp         | e-mail consultation               | awaiting review               | 2,523  |
| 44 |   |            | other note                        | other                         |        |
| 45 | 1 | nurse      |                                   |                               | 2,449  |
| 46 |   | other care |                                   |                               |        |
| 47 | 1 | provider   | gp surgery                        | surgery consultation          | 2,334  |
| 48 |   | other care |                                   |                               |        |
| 49 | 1 | provider   | enterprise consultation           | enterprise consultation       | 2,318  |
| 50 |   | other care |                                   |                               |        |
| 51 | 1 | provider   | telephone call from a patient     | telephone call from a patient | 2,211  |
| 52 | 1 | nurse      | telephone call from a patient     | telephone call from a patient | 2,183  |
| 53 | 1 | gp         | routine consultation              | awaiting review               | 2,117  |
| 54 | 1 | nurse      | emergency appointment             | emergency appointment         | 2,041  |
| 55 | 1 | gp         | home visit note                   | home visit                    | 2,021  |
| 56 | 1 | gp         | seen in gp unit                   | gp surgery                    | 1,896  |
| 57 |   |            | provision of general practitioner |                               |        |
| 58 | 1 | nurse      | intermediate care                 | gp surgery                    | 1,762  |
| 59 |   |            |                                   |                               |        |
| 60 |   |            |                                   |                               |        |

|    |   |                     |                                               |                             |       |
|----|---|---------------------|-----------------------------------------------|-----------------------------|-------|
| 1  |   |                     |                                               |                             |       |
| 2  |   |                     |                                               |                             |       |
| 3  |   |                     |                                               |                             |       |
| 4  | 1 | other care provider | clinic note                                   | clinic                      | 1,699 |
| 5  | 1 | nurse               | clinic note                                   | surgery consultation        | 1,628 |
| 6  | 1 | gp                  | clinic note                                   | clinic                      | 1,623 |
| 7  | 1 | nurse               | routine consultation                          | surgery consultation        | 1,578 |
| 8  | 1 | nurse               | seen in gp unit                               | surgery consultation        | 1,426 |
| 9  | 1 | nurse               | walk-in clinic                                | walk-in clinic              | 1,412 |
| 10 | 1 | nurse               | gp surgery                                    | clinic                      | 1,355 |
| 11 | 1 | other care provider | routine consultation                          | other                       | 1,303 |
| 12 | 1 | other care provider | clinic note                                   | surgery consultation        | 1,297 |
| 13 | 1 | gp                  | face to face consultation                     | emergency consultation      | 1,292 |
| 14 | 1 | other care provider | walk-in clinic                                | walk-in clinic              | 1,216 |
| 15 | 1 | gp                  | telephone encounter                           | telephone encounter         | 1,184 |
| 16 | 1 | gp                  | online communication                          | online services message     | 1,139 |
| 17 | 1 | gp                  | other consultation medium used                | awaiting review             | 1,134 |
| 18 | 1 | other care provider | residential home visit note                   | residential home visit note | 1,113 |
| 19 | 1 | nurse               | seen in gp unit                               | gp surgery                  | 1,103 |
| 20 | 1 | other care provider | nursing home visit note                       | nursing home visit note     | 1,081 |
| 21 | 1 | other care provider | face to face consultation                     | surgery consultation        | 1,045 |
| 22 | 1 | other care provider | seen in gp unit                               | surgery consultation        | 1,043 |
| 23 | 1 | nurse               | emergency consultation                        | emergency consultation      | 1,024 |
| 24 | 1 | nurse               | urgent consultation                           | urgent consultation         | 959   |
| 25 | 1 | gp                  | extended hours consultation                   | awaiting review             | 924   |
| 26 | 1 | gp                  | routine consultation                          | other                       | 922   |
| 27 | 1 | gp                  | home visit note                               | other                       | 835   |
| 28 | 1 | gp                  | gp surgery                                    | face to face consultation   | 808   |
| 29 | 1 | other care provider | gp surgery                                    | clinic                      | 746   |
| 30 | 1 | other care provider | routine consultation                          | surgery consultation        | 738   |
| 31 | 1 | gp                  | consultation via multimedia                   | awaiting review             | 734   |
| 32 | 1 | gp                  | face to face consultation with relative/carer | awaiting review             | 669   |
| 33 | 1 | nurse               | e-mail consultation                           | awaiting review             | 638   |
| 34 | 1 | nurse               | routine consultation                          | awaiting review             | 574   |
| 35 | 1 | nurse               | consultation via video conference             | awaiting review             | 505   |
| 36 | 1 | nurse               | routine consultation                          | other                       | 478   |
| 37 | 1 | other care provider | online communication                          | awaiting review             | 473   |
| 38 | 1 | nurse               | same day appointment                          | same day appointment        | 468   |
| 39 | 1 | gp                  | face to face consultation                     | gp surgery                  | 461   |
| 40 | 1 | gp                  | same day appointment                          | same day appointment        | 457   |
| 41 | 1 | nurse               | gp surgery                                    | face to face consultation   | 455   |
| 42 | 1 | gp                  | telephone encounter                           | telephone consultation      | 429   |
| 43 | 1 | nurse               | face to face consultation                     | emergency consultation      | 420   |

|    |   |                     |                                               |                             |     |
|----|---|---------------------|-----------------------------------------------|-----------------------------|-----|
| 1  |   |                     |                                               |                             |     |
| 2  |   |                     |                                               |                             |     |
| 3  |   |                     |                                               |                             |     |
| 4  | 1 | gp                  | group consultation                            | awaiting review             | 402 |
| 5  | 1 | nurse               | home visit note                               | other                       | 402 |
| 6  | 1 | nurse               | seen in urgent care centre                    | awaiting review             | 344 |
| 7  | 1 | gp                  | face to face consultation                     | emergency appointment       | 330 |
| 8  | 1 | gp                  | seen in urgent care centre                    | awaiting review             | 322 |
| 9  | 1 | nurse               | telephone encounter                           | telephone encounter         | 314 |
| 10 |   |                     |                                               |                             |     |
| 11 | 1 | other care provider | consultation via video conference             | awaiting review             | 288 |
| 12 | 1 | gp                  | telephone consultation                        | telephone call to a patient | 287 |
| 13 | 1 | dr                  | telephone consultation                        | telephone consultation      | 279 |
| 14 | 1 | nurse               | online communication                          | awaiting review             | 279 |
| 15 |   |                     |                                               |                             |     |
| 16 | 1 | other care provider | face to face consultation                     | awaiting review             | 272 |
| 17 |   |                     |                                               |                             |     |
| 18 | 1 | other care provider | home visit note                               | home visit                  | 262 |
| 19 |   |                     |                                               |                             |     |
| 20 | 1 | other care provider | routine consultation                          | awaiting review             | 260 |
| 21 | 1 | nurse               | home visit note                               | home visit                  | 246 |
| 22 | 1 | gp                  | consultation via sms text message             | awaiting review             | 244 |
| 23 |   |                     |                                               |                             |     |
| 24 | 1 | other care provider | online communication                          | online services message     | 241 |
| 25 |   |                     |                                               |                             |     |
| 26 | 1 | other care provider | emergency consultation                        | emergency consultation      | 235 |
| 27 |   |                     |                                               |                             |     |
| 28 | 1 | other care provider | emergency appointment                         | emergency appointment       | 231 |
| 29 | 1 | gp                  | telephone encounter                           | telephone call to a patient | 226 |
| 30 | 1 | gp                  | residential home visit note                   | residential home            | 225 |
| 31 | 1 | gp                  | face to face consultation                     | awaiting review             | 224 |
| 32 | 1 | nurse               | face to face consultation                     | gp surgery                  | 221 |
| 33 |   |                     |                                               |                             |     |
| 34 | 1 | other care provider | gp surgery                                    | face to face consultation   | 209 |
| 35 | 1 | nurse               | extended hours consultation                   | awaiting review             | 186 |
| 36 |   |                     |                                               |                             |     |
| 37 | 1 | gp                  | seen in rapid access clinic at gp surgery     | awaiting review             | 182 |
| 38 | 1 | gp                  | school visit note                             | awaiting review             | 181 |
| 39 |   |                     |                                               |                             |     |
| 40 | 1 | other care provider | telephone consultation                        | telephone call to a patient | 179 |
| 41 | 1 | nurse               | face to face consultation                     | awaiting review             | 166 |
| 42 | 1 | gp                  | home visit note                               | acute visit                 | 153 |
| 43 | 1 | nurse               | online communication                          | online services message     | 145 |
| 44 |   |                     |                                               |                             |     |
| 45 | 1 | other care provider | group consultation                            | awaiting review             | 133 |
| 46 | 1 | gp                  | seen in gp unit                               | awaiting review             | 129 |
| 47 | 1 | dr                  | clinic note                                   | surgery consultation        | 125 |
| 48 |   |                     |                                               |                             |     |
| 49 | 1 | other care provider | telephone encounter                           | telephone encounter         | 119 |
| 50 |   |                     |                                               |                             |     |
| 51 | 1 | other care provider | extended hours consultation                   | awaiting review             | 116 |
| 52 |   |                     |                                               |                             |     |
| 53 | 1 | nurse               | face to face consultation with relative/carer | awaiting review             | 115 |
| 54 | 1 | nurse               | seen in gp unit                               | awaiting review             | 109 |
| 55 | 1 | gp                  | night visit note                              | awaiting review             | 108 |
| 56 |   |                     |                                               |                             |     |
| 57 |   |                     |                                               |                             |     |
| 58 |   |                     |                                               |                             |     |
| 59 |   |                     |                                               |                             |     |
| 60 |   |                     |                                               |                             |     |



|    |   |                     |                                               |                               |     |
|----|---|---------------------|-----------------------------------------------|-------------------------------|-----|
| 1  |   |                     |                                               |                               |     |
| 2  |   |                     |                                               |                               |     |
| 3  |   |                     |                                               |                               |     |
| 4  | 1 | nurse               | school visit note                             | awaiting review               | 107 |
| 5  | 1 | nurse               | group consultation                            | awaiting review               | 102 |
| 6  | 1 | gp                  | other consultation medium used                | other                         | 99  |
| 7  | 1 | gp                  | children's home visit note                    | awaiting review               | 95  |
| 8  | 1 | gp                  | telephone consultation                        | telephone call from a patient | 94  |
| 9  | 1 | gp                  | administration note                           | other                         | 91  |
| 10 |   |                     |                                               |                               |     |
| 11 | 1 | nurse               | telephone encounter                           | telephone call to a patient   | 86  |
| 12 |   |                     |                                               |                               |     |
| 13 | 1 | other care provider | e-mail consultation                           | awaiting review               | 71  |
| 14 | 1 | nurse               | consultation via multimedia                   | awaiting review               | 65  |
| 15 | 1 | gp                  | gp surgery                                    | clinic                        | 63  |
| 16 | 1 | nurse               | telephone consultation                        | telephone call to a patient   | 63  |
| 17 |   |                     |                                               |                               |     |
| 18 | 1 | other care provider | face to face consultation with relative/carer | awaiting review               | 62  |
| 19 |   |                     |                                               |                               |     |
| 20 | 1 | gp                  | consultation via telemedicine web camera      | awaiting review               | 61  |
| 21 | 1 | dr                  | telephone call to a patient                   | telephone call to a patient   | 60  |
| 22 |   |                     |                                               |                               |     |
| 23 | 1 | nurse               | laboratory result                             | clinic                        | 55  |
| 24 |   |                     |                                               |                               |     |
| 25 | 1 | other care provider | other consultation medium used                | awaiting review               | 53  |
| 26 | 1 | nurse               | other consultation medium used                | awaiting review               | 51  |
| 27 | 1 | nurse               | district nurse visit                          | awaiting review               | 48  |
| 28 | 1 | gp                  | clinic note                                   | gp surgery                    | 47  |
| 29 |   |                     |                                               |                               |     |
| 30 | 1 | other care provider | clinic note                                   | gp surgery                    | 45  |
| 31 |   |                     |                                               |                               |     |
| 32 | 1 | other care provider | urgent consultation                           | urgent consultation           | 42  |
| 33 |   |                     |                                               |                               |     |
| 34 | 1 | other care provider | home visit note                               | other                         | 41  |
| 35 |   |                     |                                               |                               |     |
| 36 | 1 | other care provider | laboratory result                             | clinic                        | 40  |
| 37 |   |                     |                                               |                               |     |
| 38 | 1 | gp                  | laboratory result                             | acute visit                   | 39  |
| 39 | 1 | dr                  | home visit note                               | home visit note               | 38  |
| 40 |   |                     |                                               |                               |     |
| 41 | 1 | other care provider | telephone encounter                           | telephone call to a patient   | 38  |
| 42 | 1 | nurse               | telephone encounter                           | telephone consultation        | 33  |
| 43 |   |                     |                                               |                               |     |
| 44 | 1 | other care provider | consultation via sms text message             | awaiting review               | 28  |
| 45 | 1 | gp                  | walk-in clinic                                | walk-in centre                | 27  |
| 46 | 1 | nurse               | walk-in clinic                                | walk-in centre                | 27  |
| 47 |   |                     |                                               |                               |     |
| 48 | 1 | other care provider | walk-in clinic                                | clinic                        | 27  |
| 49 |   |                     |                                               |                               |     |
| 50 | 1 | nurse               | children's home visit note                    | awaiting review               | 25  |
| 51 | 1 | gp                  | gp surgery                                    | main surgery                  | 24  |
| 52 | 1 | nurse               | residential home visit note                   | residential home              | 22  |
| 53 |   |                     |                                               |                               |     |
| 54 | 1 | other care provider | seen in urgent care centre                    | awaiting review               | 22  |
| 55 | 1 | nurse               | night visit note                              | awaiting review               | 20  |
| 56 |   |                     |                                               |                               |     |
| 57 | 1 | other care provider | children's home visit note                    | awaiting review               | 19  |
| 58 |   |                     |                                               |                               |     |
| 59 | 1 | other care provider | consultation via multimedia                   | awaiting review               | 19  |
| 60 |   |                     |                                               |                               |     |

|    |   |                     |                                          |                               |      |
|----|---|---------------------|------------------------------------------|-------------------------------|------|
| 1  |   |                     |                                          |                               |      |
| 2  |   |                     |                                          |                               |      |
| 3  |   |                     |                                          |                               |      |
| 4  | 1 | gp                  | home visit note                          | nursing home visit note       | 17   |
| 5  | 1 | gp                  | nursing home visit note                  | nursing home                  | 17   |
| 6  | 1 | gp                  | residential home visit note              | nursing home                  | 15   |
| 7  | 1 | other care provider | face to face consultation                | gp surgery                    | 14   |
| 8  | 1 | other care provider | night visit note                         | awaiting review               | 14   |
| 9  | 1 | other care provider | other consultation medium used           | other                         | 14   |
| 10 | 1 | nurse               | clinic note                              | gp surgery                    | 13   |
| 11 | 1 | nurse               | walk-in clinic                           | clinic                        | 13   |
| 12 | 1 | nurse               | home visit note                          | acute visit                   | 10   |
| 13 | 1 | nurse               | consultation via sms text message        | awaiting review               | < 10 |
| 14 | 1 | nurse               | consultation via telemedicine web camera | awaiting review               | < 10 |
| 15 | 1 | dr                  | consultation via video conference        | awaiting review               | < 10 |
| 16 | 1 | dr                  | nursing home visit note                  | nursing home visit note       | < 10 |
| 17 | 1 | other care provider | home visit note                          | nursing home visit note       | < 10 |
| 18 | 1 | dr                  | other note                               | other                         | < 10 |
| 19 | 1 | gp                  | telephone encounter                      | telephone call from a patient | < 10 |
| 20 | 1 | gp                  | twilight visit note                      | awaiting review               | < 10 |
| 21 | 1 | other care provider | laboratory result                        | acute visit                   | < 10 |
| 22 | 1 | dr                  | face to face consultation                | face to face consultation     | < 10 |
| 23 | 1 | gp                  | home visit note                          | follow-up/routine visit       | < 10 |
| 24 | 1 | gp                  | other consultation medium used           | casualty attendance           | < 10 |
| 25 | 1 | other care provider | home visit note                          | residential home visit note   | < 10 |
| 26 | 1 | other care provider | other note                               | gp surgery                    | < 10 |
| 27 | 1 | gp                  | home visit note                          | awaiting review               | < 10 |
| 28 | 1 | gp                  | non-consultation medication data         | awaiting review               | < 10 |
| 29 | 1 | gp                  | remote consultation                      | awaiting review               | < 10 |
| 30 | 1 | gp                  | third party consultation                 | casualty attendance           | < 10 |
| 31 | 1 | nurse               | home visit note                          | follow-up/routine visit       | < 10 |
| 32 | 1 | nurse               | telephone encounter                      | telephone call from a patient | < 10 |
| 33 | 1 | nurse               | third party consultation                 | casualty attendance           | < 10 |
| 34 | 1 | dr                  | enterprise consultation                  | enterprise consultation       | < 10 |
| 35 | 1 | dr                  | telephone call from a patient            | telephone call from a patient | < 10 |
| 36 | 1 | gp                  | district nurse visit                     | awaiting review               | < 10 |
| 37 | 1 | gp                  | e-mail received from patient             | acute visit                   | < 10 |
| 38 | 1 | gp                  | hospital outpatient report               | casualty attendance           | < 10 |
| 39 | 1 | gp                  | joint consultation                       | awaiting review               | < 10 |
| 40 | 1 | gp                  | pharmacy consultation                    | awaiting review               | < 10 |
| 41 | 1 | gp                  | telephone call to a patient              | telephone consultation        | < 10 |
| 42 | 1 | nurse               | administration note                      | other                         | < 10 |
| 43 | 1 | nurse               | face to face consultation                | emergency appointment         | < 10 |
| 44 | 1 | other care provider | consultation via telemedicine web camera | awaiting review               | < 10 |
| 45 | 1 | other care provider | consultation via telemedicine web camera | awaiting review               | < 10 |
| 46 | 1 | other care provider | consultation via telemedicine web camera | awaiting review               | < 10 |
| 47 | 1 | other care provider | consultation via telemedicine web camera | awaiting review               | < 10 |
| 48 | 1 | other care provider | consultation via telemedicine web camera | awaiting review               | < 10 |
| 49 | 1 | other care provider | consultation via telemedicine web camera | awaiting review               | < 10 |
| 50 | 1 | other care provider | consultation via telemedicine web camera | awaiting review               | < 10 |
| 51 | 1 | other care provider | consultation via telemedicine web camera | awaiting review               | < 10 |
| 52 | 1 | other care provider | consultation via telemedicine web camera | awaiting review               | < 10 |
| 53 | 1 | other care provider | consultation via telemedicine web camera | awaiting review               | < 10 |
| 54 | 1 | other care provider | consultation via telemedicine web camera | awaiting review               | < 10 |
| 55 | 1 | other care provider | consultation via telemedicine web camera | awaiting review               | < 10 |
| 56 | 1 | other care provider | consultation via telemedicine web camera | awaiting review               | < 10 |
| 57 | 1 | other care provider | consultation via telemedicine web camera | awaiting review               | < 10 |
| 58 | 1 | other care provider | consultation via telemedicine web camera | awaiting review               | < 10 |
| 59 | 1 | other care provider | consultation via telemedicine web camera | awaiting review               | < 10 |
| 60 | 1 | other care provider | consultation via telemedicine web camera | awaiting review               | < 10 |

|    |               |                     |                                                     |                               |         |
|----|---------------|---------------------|-----------------------------------------------------|-------------------------------|---------|
| 1  |               |                     |                                                     |                               |         |
| 2  |               |                     |                                                     |                               |         |
| 3  |               |                     |                                                     |                               |         |
| 4  | 1             | other care provider | face to face consultation                           | emergency appointment         | < 10    |
| 5  |               |                     |                                                     |                               |         |
| 6  | 1             | other care provider | face to face consultation                           | emergency consultation        | < 10    |
| 7  |               |                     |                                                     |                               |         |
| 8  | 1             | other care provider | home visit note                                     | acute visit                   | < 10    |
| 9  |               |                     |                                                     |                               |         |
| 10 | 1             | other care provider | pharmacy consultation                               | awaiting review               | < 10    |
| 11 |               |                     |                                                     |                               |         |
| 12 | 1             | other care provider | residential home visit note                         | residential home              | < 10    |
| 13 |               |                     |                                                     |                               |         |
| 14 | 1             | other care provider | telephone encounter                                 | telephone consultation        | < 10    |
| 15 | 1             | dr                  | group consultation                                  | awaiting review               | < 10    |
| 16 | 1             | dr                  | home visit note                                     | acute visit                   | < 10    |
| 17 | 1             | gp                  | clinic note                                         | follow-up/routine visit       | < 10    |
| 18 | 1             | gp                  | emergency consultation                              | casualty attendance           | < 10    |
| 19 | 1             | gp                  | home visit note                                     | nursing home                  | < 10    |
| 20 |               |                     |                                                     |                               |         |
| 21 | 1             | nurse               | seen in rapid access clinic at gp surgery           | awaiting review               | < 10    |
| 22 | 1             | nurse               | telephone consultation                              | telephone call from a patient | < 10    |
| 23 | 1             | nurse               | twilight visit note                                 | awaiting review               | < 10    |
| 24 |               |                     |                                                     |                               |         |
| 25 | 1             | other care provider | administration note                                 | other                         | < 10    |
| 26 | 1             | other care provider | children's home visit note                          | clinic                        | < 10    |
| 27 |               |                     |                                                     |                               |         |
| 28 | 1             | other care provider | home visit note                                     | awaiting review               | < 10    |
| 29 |               |                     |                                                     |                               |         |
| 30 | 1             | other care provider | twilight visit note                                 | awaiting review               | < 10    |
| 31 |               |                     |                                                     |                               |         |
| 32 | 1             | other care provider | twilight visit note                                 | awaiting review               | < 10    |
| 33 |               |                     |                                                     |                               |         |
| 34 | excl. job cat |                     | gp surgery                                          | gp surgery                    | 875,291 |
| 35 | excl. job cat |                     | other note                                          | other                         | 31,332  |
| 36 | excl. job cat |                     | telephone consultation                              | telephone consultation        | 29,455  |
| 37 |               |                     |                                                     |                               |         |
| 38 | excl. job cat |                     | online communication                                | online services message       | 14,055  |
| 39 | excl. job cat |                     | telephone call to a patient                         | telephone call to a patient   | 13,935  |
| 40 |               |                     |                                                     |                               |         |
| 41 | excl. job cat |                     | provision of general practitioner intermediate care | gp surgery                    | 9,791   |
| 42 | excl. job cat |                     | telephone call from a patient                       | telephone call from a patient | 7,098   |
| 43 | excl. job cat |                     | seen in gp unit                                     | gp surgery                    | 6,240   |
| 44 | excl. job cat |                     | home visit note                                     | home visit note               | 4,776   |
| 45 |               |                     |                                                     |                               |         |
| 46 | excl. job cat |                     | routine consultation                                | other                         | 4,248   |
| 47 | excl. job cat |                     | gp surgery                                          | surgery consultation          | 3,047   |
| 48 | excl. job cat |                     | home visit note                                     | other                         | 2,664   |
| 49 | excl. job cat |                     | face to face consultation                           | face to face consultation     | 2,071   |
| 50 | excl. job cat |                     | face to face consultation                           | surgery consultation          | 1,177   |
| 51 | excl. job cat |                     | online communication                                | awaiting review               | 1,098   |
| 52 | excl. job cat |                     | nursing home visit note                             | nursing home visit note       | 708     |
| 53 | excl. job cat |                     | routine consultation                                | surgery consultation          | 509     |
| 54 | excl. job cat |                     | consultation via video conference                   | awaiting review               | 494     |
| 55 |               |                     |                                                     |                               |         |
| 56 | excl. job cat |                     | routine consultation                                | awaiting review               | 453     |
| 57 | excl. job cat |                     | enterprise consultation                             | enterprise consultation       | 398     |
| 58 | excl. job cat |                     | administration note                                 | other                         | 376     |
| 59 |               |                     |                                                     |                               |         |
| 60 | excl. job cat |                     | telephone encounter                                 | telephone encounter           | 376     |

|    |               |                                               |                               |      |
|----|---------------|-----------------------------------------------|-------------------------------|------|
| 1  |               |                                               |                               |      |
| 2  |               |                                               |                               |      |
| 3  | excl. job cat | home visit note                               | awaiting review               | 371  |
| 4  | excl. job cat | clinic note                                   | clinic                        | 337  |
| 5  | excl. job cat | clinic note                                   | surgery consultation          | 329  |
| 6  | excl. job cat | residential home visit note                   | residential home visit note   | 327  |
| 7  | excl. job cat | face to face consultation                     | gp surgery                    | 305  |
| 8  | excl. job cat | face to face consultation                     | awaiting review               | 293  |
| 9  | excl. job cat | home visit note                               | home visit                    | 250  |
| 10 | excl. job cat | urgent consultation                           | urgent consultation           | 240  |
| 11 | excl. job cat | walk-in clinic                                | walk-in clinic                | 196  |
| 12 | excl. job cat | group consultation                            | awaiting review               | 170  |
| 13 | excl. job cat | seen in gp unit                               | surgery consultation          | 148  |
| 14 | excl. job cat | e-mail consultation                           | awaiting review               | 145  |
| 15 | excl. job cat | emergency consultation                        | emergency consultation        | 121  |
| 16 | excl. job cat | face to face consultation with relative/carer | awaiting review               | 116  |
| 17 | excl. job cat | consultation via multimedia                   | awaiting review               | 75   |
| 18 | excl. job cat | seen in gp unit                               | awaiting review               | 75   |
| 19 | excl. job cat | children's home visit note                    | awaiting review               | 63   |
| 20 | excl. job cat | other note                                    | gp surgery                    | 54   |
| 21 | excl. job cat | other consultation medium used                | other                         | 44   |
| 22 | excl. job cat | other consultation medium used                | awaiting review               | 42   |
| 23 | excl. job cat | extended hours consultation                   | awaiting review               | 37   |
| 24 | excl. job cat | gp surgery                                    | face to face consultation     | 36   |
| 25 | excl. job cat | emergency appointment                         | emergency appointment         | 35   |
| 26 | excl. job cat | gp surgery                                    | clinic                        | 32   |
| 27 | excl. job cat | face to face consultation                     | emergency consultation        | 25   |
| 28 | excl. job cat | residential home visit note                   | residential home              | 23   |
| 29 | excl. job cat | telephone encounter                           | telephone call to a patient   | 23   |
| 30 | excl. job cat | night visit note                              | awaiting review               | 14   |
| 31 | excl. job cat | home visit note                               | acute visit                   | 13   |
| 32 | excl. job cat | walk-in clinic                                | walk-in centre                | 11   |
| 33 | excl. job cat | district nurse visit                          | awaiting review               | < 10 |
| 34 | excl. job cat | seen in urgent care centre                    | awaiting review               | < 10 |
| 35 | excl. job cat | twilight visit note                           | awaiting review               | < 10 |
| 36 | excl. job cat | clinic note                                   | gp surgery                    | < 10 |
| 37 | excl. job cat | laboratory result                             | acute visit                   | < 10 |
| 38 | excl. job cat | telephone consultation                        | telephone call to a patient   | < 10 |
| 39 | excl. job cat | walk-in clinic                                | clinic                        | < 10 |
| 40 | excl. job cat | telephone encounter                           | telephone call from a patient | < 10 |
| 41 | excl. job cat | emergency consultation                        | casualty attendance           | < 10 |
| 42 | excl. job cat | pharmacy consultation                         | awaiting review               | < 10 |
| 43 | excl. job cat | third party consultation                      | casualty attendance           | < 10 |
| 44 | excl. job cat | case conference                               | gp surgery                    | < 10 |
| 45 | excl. job cat | emergency consultation                        | awaiting review               | < 10 |
| 46 | excl. job cat | gp surgery                                    | main surgery                  | < 10 |
| 47 | excl. job cat | home visit note                               | follow-up/routine visit       | < 10 |
| 48 | excl. job cat | non-consultation medication data              | casualty attendance           | < 10 |
| 49 | excl. job cat | nursing home visit note                       | nursing home                  | < 10 |
| 50 |               |                                               |                               |      |
| 51 |               |                                               |                               |      |
| 52 |               |                                               |                               |      |
| 53 |               |                                               |                               |      |
| 54 |               |                                               |                               |      |
| 55 |               |                                               |                               |      |
| 56 |               |                                               |                               |      |
| 57 |               |                                               |                               |      |
| 58 |               |                                               |                               |      |
| 59 |               |                                               |                               |      |
| 60 |               |                                               |                               |      |

|    |               |                     |                                              |                          |           |
|----|---------------|---------------------|----------------------------------------------|--------------------------|-----------|
| 1  |               |                     |                                              |                          |           |
| 2  |               |                     |                                              |                          |           |
| 3  | excl. job cat |                     | remote consultation                          | awaiting review          | < 10      |
| 4  | excl. job cat |                     | same day appointment                         | same day appointment     | < 10      |
| 5  | excl. job cat |                     | school visit note                            | awaiting review          | < 10      |
| 6  | excl. job cat |                     | telephone consultation                       | awaiting review          | < 10      |
| 7  | excl. job cat |                     | telephone encounter                          | telephone consultation   | < 10      |
| 8  | excl. job cat |                     | third party consultation                     | awaiting review          | < 10      |
| 9  | excl. job cat |                     |                                              |                          |           |
| 10 | 0             | gp                  | externally entered note                      | externally entered       | 3,467,397 |
| 11 | 0             |                     | scanned document                             | docman                   | 3,183,781 |
| 12 | 0             |                     | administration note                          | administration note      | 968,767   |
| 13 | 0             |                     |                                              |                          | 737,843   |
| 14 | 0             |                     | scanned document                             | scanned document         | 727,269   |
| 15 | 0             | gp                  | administration note                          | administration note      | 725,612   |
| 16 | 0             |                     | inbound document                             | inbound document         | 402,647   |
| 17 | 0             |                     | awaiting clinical code migration to emis web | awaiting review          | 385,598   |
| 18 | 0             | nurse               | externally entered note                      | externally entered       | 303,830   |
| 19 | 0             | gp                  | awaiting clinical code migration to emis web | awaiting review          | 261,627   |
| 20 | 0             |                     | administration note                          | administration           | 256,604   |
| 21 | 0             | other care provider | scanned document                             | docman                   | 255,022   |
| 22 | 0             |                     | externally entered note                      | externally entered       | 252,167   |
| 23 | 0             | gp                  |                                              |                          | 208,462   |
| 24 | 0             | gp                  | outbound referral                            | outbound referral        | 197,534   |
| 25 | 0             | gp                  | awaiting clinical code migration to emis web | gp surgery               | 162,048   |
| 26 | 0             | other care provider | administration note                          | administration note      | 160,918   |
| 27 | 0             |                     | awaiting clinical code migration to emis web | third party consultation | 147,374   |
| 28 | 0             | gp                  | scanned document                             | scanned document         | 145,355   |
| 29 | 0             |                     | awaiting clinical code migration to emis web | gp surgery               | 127,041   |
| 30 | 0             | gp                  | awaiting clinical code migration to emis web | results recording        | 122,118   |
| 31 | 0             |                     | awaiting clinical code migration to emis web | other                    | 121,401   |
| 32 | 0             | gp                  | awaiting clinical code migration to emis web | surgery consultation     | 107,304   |
| 33 | 0             |                     | awaiting clinical code migration to emis web |                          | 104,693   |
| 34 | 0             | gp                  | inbound document                             | inbound document         | 102,534   |
| 35 | 0             | nurse               | awaiting clinical code migration to emis web | awaiting review          | 94,158    |
| 36 | 0             | other care provider | awaiting clinical code migration to emis web | gp surgery               | 86,398    |
| 37 | 0             | other care provider | awaiting clinical code migration to emis web | awaiting review          | 85,745    |
| 38 | 0             | nurse               | administration note                          | administration note      | 84,051    |
| 39 | 0             | gp                  | awaiting clinical code migration to emis web |                          | 77,585    |
| 40 | 0             | nurse               | awaiting clinical code migration to emis web | gp surgery               | 75,552    |

|   |                     |                                              |                                  |        |
|---|---------------------|----------------------------------------------|----------------------------------|--------|
| 0 | other care provider |                                              |                                  | 66,366 |
| 0 | other care provider | externally entered note                      | externally entered               | 62,810 |
| 0 |                     | externally entered note                      | externally entered note          | 61,848 |
| 0 |                     | awaiting clinical code migration to emis web | repeat issue                     | 61,683 |
| 0 | nurse               |                                              |                                  | 58,019 |
| 0 | gp                  | telephone triage encounter                   | telephone triage encounter       | 50,662 |
| 0 |                     | third party consultation                     | third party consultation         | 44,609 |
| 0 | other care provider | scanned document                             | scanned document                 | 38,341 |
| 0 | nurse               | awaiting clinical code migration to emis web |                                  | 35,376 |
| 0 | nurse               | awaiting clinical code migration to emis web | surgery consultation             | 27,699 |
| 0 | gp                  | administration note                          | administration                   | 27,390 |
| 0 | gp                  | awaiting clinical code migration to emis web | telephone consultation           | 26,214 |
| 0 | gp                  | awaiting clinical code migration to emis web | other                            | 26,204 |
| 0 |                     | awaiting clinical code migration to emis web | scanned document                 | 25,627 |
| 0 |                     | awaiting clinical code migration to emis web | administration note              | 24,458 |
| 0 |                     | gp surgery                                   | awaiting review                  | 24,337 |
| 0 |                     | awaiting clinical code migration to emis web | touchscreen                      | 24,311 |
| 0 | gp                  | third party consultation                     | third party consultation         | 23,952 |
| 0 |                     | awaiting clinical code migration to emis web | patientchase insert              | 22,515 |
| 0 | gp                  | laboratory result                            | results recording                | 22,066 |
| 0 | gp                  | externally entered note                      | externally entered note          | 20,864 |
| 0 | gp                  | awaiting clinical code migration to emis web | administration note              | 20,729 |
| 0 | other care provider | inbound document                             | inbound document                 | 20,159 |
| 0 | gp                  | telephone call to relative/carer             | telephone call to relative/carer | 19,234 |
| 0 | other care provider | awaiting clinical code migration to emis web |                                  | 17,081 |
| 0 |                     | awaiting clinical code migration to emis web | surgery consultation             | 15,972 |
| 0 | nurse               | awaiting clinical code migration to emis web | clinic                           | 15,892 |
| 0 | gp                  | other note                                   | other note                       | 15,816 |
| 0 | gp                  | gp surgery                                   | awaiting review                  | 15,810 |
| 0 | gp                  | discussion with colleague                    | discussion with colleague        | 12,973 |
| 0 | gp                  | awaiting clinical code migration to emis web | telephone call to a patient      | 11,782 |
| 0 |                     | repeat prescription                          | repeat issue                     | 11,542 |
| 0 | other care provider | administration note                          | administration                   | 11,037 |
| 0 | nurse               | awaiting clinical code migration to emis web | other                            | 11,008 |

|    |   |                     |                                              |                                    |        |
|----|---|---------------------|----------------------------------------------|------------------------------------|--------|
| 1  |   |                     |                                              |                                    |        |
| 2  |   |                     |                                              |                                    |        |
| 3  | 0 |                     | hospital outpatient report                   | hospital outpatient report         | 10,033 |
| 4  | 0 | nurse               | inbound document                             | inbound document                   | 9,304  |
| 5  | 0 | nurse               | scanned document                             | scanned document                   | 7,878  |
| 6  | 0 | other care provider | awaiting clinical code migration to emis web | repeat issue                       | 7,745  |
| 7  | 0 | gp                  | awaiting clinical code migration to emis web | outbound referral                  | 7,402  |
| 8  | 0 | other care provider | externally entered note                      | externally entered note            | 6,736  |
| 9  | 0 | gp                  | telephone call from relative/carer           | telephone call from relative/carer | 6,626  |
| 10 | 0 | other care provider | awaiting clinical code migration to emis web | surgery consultation               | 6,514  |
| 11 | 0 |                     | awaiting clinical code migration to emis web | inbound document                   | 6,495  |
| 12 | 0 | nurse               | gp surgery                                   | awaiting review                    | 6,475  |
| 13 | 0 | other care provider | awaiting clinical code migration to emis web | other                              | 6,315  |
| 14 | 0 | nurse               | administration note                          | administration                     | 6,285  |
| 15 | 0 |                     | outbound referral                            | outbound referral                  | 6,194  |
| 16 | 0 | nurse               | telephone triage encounter                   | telephone triage encounter         | 6,074  |
| 17 | 0 | gp                  | clinic note                                  | clinic note                        | 5,834  |
| 18 | 0 | gp                  | awaiting clinical code migration to emis web | repeat issue                       | 5,803  |
| 19 | 0 | gp                  | non-consultation data                        | non-consultation data              | 5,552  |
| 20 | 0 | other care provider | third party consultation                     | third party consultation           | 5,505  |
| 21 | 0 | other care provider | gp surgery                                   | awaiting review                    | 5,332  |
| 22 | 0 | gp                  | awaiting clinical code migration to emis web | telephone call from a patient      | 5,282  |
| 23 | 0 | nurse               | externally entered note                      | externally entered note            | 5,251  |
| 24 | 0 | gp                  | face to face consultation                    | triage                             | 5,196  |
| 25 | 0 | nurse               | telephone call to relative/carer             | telephone call to relative/carer   | 5,191  |
| 26 | 0 |                     | awaiting clinical code migration to emis web | mail to patient                    | 5,178  |
| 27 | 0 |                     | non-consultation data                        | non-consultation data              | 4,933  |
| 28 | 0 | gp                  | e-mail received from patient                 | e-mail received from patient       | 4,877  |
| 29 | 0 | nurse               | outbound referral                            | outbound referral                  | 4,787  |
| 30 | 0 |                     | medication requested                         | repeat issue                       | 4,639  |
| 31 | 0 | nurse               | third party consultation                     | third party consultation           | 4,605  |
| 32 | 0 | nurse               | awaiting clinical code migration to emis web | results recording                  | 4,405  |
| 33 | 0 | gp                  | awaiting clinical code migration to emis web | scanned document                   | 4,384  |
| 34 | 0 |                     | other note                                   | other note                         | 4,375  |
| 35 | 0 |                     | awaiting clinical code migration to emis web | mjog                               | 4,221  |
| 36 | 0 | other care provider | other note                                   | other note                         | 4,071  |
| 37 | 0 |                     | mail to patient                              | mail to patient                    | 3,924  |
| 38 | 0 | other care provider | awaiting clinical code migration to emis web | clinic                             | 3,859  |
| 39 | 0 |                     | e-mail received from patient                 | e-mail received from patient       | 3,632  |



|   |                     |                                              |                                    |       |
|---|---------------------|----------------------------------------------|------------------------------------|-------|
| 0 |                     | awaiting clinical code migration to emis web | out of hours, non practice         | 3,607 |
| 0 | other care provider | clinic note                                  | clinic note                        | 3,371 |
| 0 | gp                  | awaiting clinical code migration to emis web | home visit note                    | 3,370 |
| 0 | gp                  | hospital outpatient report                   | hospital outpatient report         | 3,359 |
| 0 | nurse               | nurse telephone triage                       | nurse telephone triage             | 3,274 |
| 0 | nurse               | clinic note                                  | clinic note                        | 3,252 |
| 0 | gp                  | awaiting clinical code migration to emis web | clinic                             | 3,245 |
| 0 | other care provider | awaiting clinical code migration to emis web | administration note                | 3,044 |
| 0 | gp                  | awaiting clinical code migration to emis web | third party consultation           | 3,038 |
| 0 | other care provider | awaiting clinical code migration to emis web | medicine management                | 2,829 |
| 0 | other care provider | telephone call to relative/carer             | telephone call to relative/carer   | 2,807 |
| 0 | nurse               | awaiting clinical code migration to emis web | telephone consultation             | 2,782 |
| 0 |                     | awaiting clinical code migration to emis web | clinic                             | 2,775 |
| 0 |                     | laboratory result                            | laboratory result                  | 2,727 |
| 0 | gp                  | awaiting clinical code migration to emis web | inbound document                   | 2,605 |
| 0 |                     | telephone call from relative/carer           | telephone call from relative/carer | 2,594 |
| 0 |                     | clinic note                                  | clinic note                        | 2,579 |
| 0 | gp                  | laboratory result                            | laboratory result                  | 2,511 |
| 0 | other care provider | repeat prescription                          | repeat issue                       | 2,511 |
| 0 |                     | awaiting clinical code migration to emis web | home of patient                    | 2,454 |
| 0 | gp                  | awaiting clinical code migration to emis web | out of hours, non practice         | 2,365 |
| 0 | gp                  | awaiting clinical code migration to emis web | nhs direct report                  | 2,334 |
| 0 |                     | awaiting clinical code migration to emis web | results recording                  | 2,185 |
| 0 | dr                  | third party consultation                     | third party consultation           | 2,146 |
| 0 | other care provider | awaiting clinical code migration to emis web | third party consultation           | 2,095 |
| 0 | nurse               | awaiting clinical code migration to emis web | administration note                | 2,075 |
| 0 |                     | administration note                          | patientchase insert                | 1,855 |
| 0 |                     | clinic note                                  | awaiting review                    | 1,790 |
| 0 |                     | hospital inpatient report                    | hospital inpatient report          | 1,760 |
| 0 |                     | e-mail received from patient                 | docman                             | 1,753 |
| 0 | nurse               | other note                                   | other note                         | 1,708 |
| 0 | nurse               | non-consultation data                        | non-consultation data              | 1,681 |
| 0 | gp                  | awaiting clinical code migration to emis web | referral letter                    | 1,660 |
| 0 |                     | laboratory result                            | results recording                  | 1,624 |



|   |                     |                                              |                                    |       |
|---|---------------------|----------------------------------------------|------------------------------------|-------|
| 0 |                     | awaiting clinical code migration to emis web | non-consultation data              | 1,537 |
| 0 | gp                  | awaiting clinical code migration to emis web | medicine management                | 1,510 |
| 0 | nurse               | laboratory result                            | results recording                  | 1,464 |
| 0 | nurse               | telephone call from relative/carer           | telephone call from relative/carer | 1,401 |
| 0 |                     | administration note                          | scanned document                   | 1,373 |
| 0 |                     | telephone triage encounter                   | telephone triage encounter         | 1,353 |
| 0 | gp                  | medication requested                         | awaiting review                    | 1,347 |
| 0 | nurse               | discussion with colleague                    | discussion with colleague          | 1,329 |
| 0 | gp                  | awaiting clinical code migration to emis web | telephone triage encounter         | 1,313 |
| 0 | nurse               | awaiting clinical code migration to emis web | telephone call to a patient        | 1,243 |
| 0 | other care provider | non-consultation data                        | non-consultation data              | 1,239 |
| 0 | gp                  | case conference                              | awaiting review                    | 1,225 |
| 0 | gp                  | awaiting clinical code migration to emis web | externally entered note            | 1,206 |
| 0 |                     | telephone call to relative/carer             | telephone call to relative/carer   | 1,191 |
| 0 | nurse               | awaiting clinical code migration to emis web | third party consultation           | 1,170 |
| 0 | gp                  | e-mail sent to patient                       | awaiting review                    | 1,162 |
| 0 | dr                  | administration note                          | administration                     | 1,159 |
| 0 |                     | other note                                   |                                    | 1,156 |
| 0 |                     | administration note                          |                                    | 1,120 |
| 0 | dr                  | externally entered note                      | externally entered                 | 1,113 |
| 0 | gp                  | awaiting clinical code migration to emis web | face to face consultation          | 1,112 |
| 0 | other care provider | telephone triage encounter                   | telephone triage encounter         | 1,107 |
| 0 | nurse               | laboratory result                            | laboratory result                  | 1,064 |
| 0 | other care provider | outbound referral                            | outbound referral                  | 1,052 |
| 0 | gp                  | clinic note                                  | awaiting review                    | 1,030 |
| 0 | other care provider | mail to patient                              | patientchase insert                | 1,019 |
| 0 | gp                  | repeat prescription                          | awaiting review                    | 1,003 |
| 0 | gp                  | awaiting clinical code migration to emis web | data transferred from other system | 983   |
| 0 |                     | awaiting clinical code migration to emis web | non-consultation medication data   | 980   |
| 0 | gp                  | awaiting clinical code migration to emis web | nursing home visit note            | 971   |
| 0 | gp                  | repeat prescription                          | repeat issue                       | 964   |
| 0 |                     | awaiting clinical code migration to emis web | telephone call to a patient        | 901   |
| 0 | dr                  |                                              |                                    | 885   |
| 0 | nurse               | awaiting clinical code migration to emis web | face to face consultation          | 853   |
| 0 | other care provider | hospital outpatient report                   | hospital outpatient report         | 828   |
| 0 |                     | clinic note                                  | community clinic                   | 823   |

|    |   |                     |                                              |                                    |     |
|----|---|---------------------|----------------------------------------------|------------------------------------|-----|
| 1  |   |                     | awaiting clinical code migration to emis web |                                    |     |
| 2  | 0 |                     | awaiting clinical code migration to emis web | gp2gp import                       | 822 |
| 3  |   |                     | awaiting clinical code migration to emis web | letter from outpatients            | 809 |
| 4  | 0 | other care provider | mail to patient                              | mail to patient                    | 801 |
| 5  | 0 | other care provider | telephone call from relative/carer           | telephone call from relative/carer | 789 |
| 6  | 0 |                     | awaiting clinical code migration to emis web | externally entered note            | 769 |
| 7  | 0 |                     | awaiting clinical code migration to emis web | referral letter                    | 751 |
| 8  | 0 | other care provider | awaiting clinical code migration to emis web | inbound document                   | 719 |
| 9  | 0 |                     | e-mail sent to patient                       | awaiting review                    | 711 |
| 10 | 0 | gp                  | hospital inpatient report                    | hospital inpatient report          | 710 |
| 11 | 0 | nurse               | awaiting clinical code migration to emis web | repeat issue                       | 694 |
| 12 | 0 | gp                  | awaiting clinical code migration to emis web | acute visit                        | 693 |
| 13 | 0 | gp                  | awaiting clinical code migration to emis web | telephone call to relative/carer   | 680 |
| 14 | 0 |                     | non-consultation medication data             | repeat issue                       | 679 |
| 15 | 0 | nurse               | awaiting clinical code migration to emis web | home visit note                    | 672 |
| 16 | 0 | other care provider | discussion with colleague                    | discussion with colleague          | 665 |
| 17 | 0 |                     | administration note                          | docman                             | 665 |
| 18 | 0 | gp                  | other note                                   |                                    | 661 |
| 19 | 0 |                     | awaiting clinical code migration to emis web | telephone consultation             | 656 |
| 20 | 0 | other care provider | awaiting clinical code migration to emis web | scanned document                   | 642 |
| 21 | 0 |                     | ooh report                                   | third party consultation           | 637 |
| 22 | 0 | gp                  | scanned document                             | externally entered                 | 619 |
| 23 | 0 | gp                  | medication requested                         | repeat issue                       | 606 |
| 24 | 0 | nurse               | awaiting clinical code migration to emis web | telephone triage encounter         | 602 |
| 25 | 0 | other care provider | awaiting clinical code migration to emis web | telephone call to a patient        | 541 |
| 26 | 0 | other care provider | awaiting clinical code migration to emis web | face to face consultation          | 534 |
| 27 | 0 | dr                  | administration note                          | administration note                | 525 |
| 28 | 0 | gp                  | discussion with other professional           | awaiting review                    | 514 |
| 29 | 0 | gp                  | administration note                          | awaiting review                    | 509 |
| 30 | 0 | other care provider | awaiting clinical code migration to emis web | mail to patient                    | 507 |
| 31 | 0 |                     | ooh report                                   | awaiting review                    | 504 |
| 32 | 0 | dr                  | awaiting clinical code migration to emis web | gp surgery                         | 501 |
| 33 | 0 |                     | walk-in clinic                               |                                    | 495 |
| 34 | 0 |                     | administration note                          | inbound document                   | 493 |
| 35 | 0 |                     | routine consultation                         | repeat issue                       | 488 |

1  
2  
3  
4  
5  
6  
7  
8  
9  
10  
11  
12  
13  
14  
15  
16  
17  
18  
19  
20  
21  
22  
23  
24  
25  
26  
27  
28  
29  
30  
31  
32  
33  
34  
35  
36  
37  
38  
39  
40  
41  
42  
43  
44  
45  
46  
47  
48  
49  
50  
51  
52  
53  
54  
55  
56  
57  
58  
59  
60

|   |                     |                                              |                                    |     |
|---|---------------------|----------------------------------------------|------------------------------------|-----|
|   |                     | awaiting clinical code migration to emis web | telephone call from a patient      | 486 |
| 0 |                     |                                              |                                    |     |
| 0 | gp                  | ooh report                                   | out of hours, non practice         | 478 |
| 0 | gp                  | mail from patient                            | mail from patient                  | 473 |
| 0 |                     | other note                                   | awaiting review                    | 472 |
| 0 | gp                  | awaiting clinical code migration to emis web | enterprise consultation            | 458 |
| 0 | other care provider | repeat prescription                          | awaiting review                    | 455 |
| 0 | gp                  | awaiting clinical code migration to emis web | discussion with colleague          | 451 |
| 0 |                     | awaiting clinical code migration to emis web | outbound referral                  | 450 |
| 0 | gp                  | awaiting clinical code migration to emis web | nursing home                       | 447 |
| 0 | dr                  | awaiting clinical code migration to emis web | awaiting review                    | 444 |
| 0 | nurse               | e-mail received from patient                 | e-mail received from patient       | 443 |
| 0 |                     | awaiting clinical code migration to emis web | data transferred from other system | 442 |
| 0 | nurse               | ooh report                                   | awaiting review                    | 439 |
| 0 |                     | administration note                          | awaiting review                    | 436 |
| 0 | other care provider | clinic note                                  | awaiting review                    | 431 |
| 0 | gp                  | administration note                          |                                    | 415 |
| 0 | gp                  | administration note                          | scanned document                   | 414 |
| 0 | gp                  | awaiting clinical code migration to emis web | urgent consultation                | 404 |
| 0 | other care provider | awaiting clinical code migration to emis web | externally entered note            | 385 |
| 0 |                     | awaiting clinical code migration to emis web | school                             | 384 |
| 0 | nurse               | hospital outpatient report                   | hospital outpatient report         | 380 |
| 0 |                     | mail to patient                              | patientchase insert                | 377 |
| 0 |                     | awaiting clinical code migration to emis web | telephone encounter                | 376 |
| 0 | gp                  | administration note                          | results recording                  | 372 |
| 0 |                     | discussion with colleague                    | discussion with colleague          | 368 |
| 0 | other care provider | awaiting clinical code migration to emis web | results recording                  | 365 |
| 0 |                     | case conference                              | awaiting review                    | 361 |
| 0 | other care provider | awaiting clinical code migration to emis web | telephone consultation             | 350 |
| 0 | other care provider | awaiting clinical code migration to emis web | patientchase insert                | 345 |
| 0 |                     | sms text message sent to patient             | patientchase insert                | 345 |
| 0 | nurse               | mail to patient                              | mail to patient                    | 342 |
| 0 |                     | awaiting clinical code migration to emis web | hospital outpatient report         | 336 |
| 0 |                     | gp surgery                                   |                                    | 315 |
| 0 | gp                  | ooh report                                   | nhs direct report                  | 314 |
| 0 | gp                  | administration note                          | referral letter                    | 313 |
| 0 | dr                  | awaiting clinical code migration to emis web |                                    | 310 |

|    |   |                     |                                              |                                    |     |
|----|---|---------------------|----------------------------------------------|------------------------------------|-----|
| 1  |   |                     |                                              |                                    |     |
| 2  |   |                     |                                              |                                    |     |
| 3  |   |                     |                                              |                                    |     |
| 4  | 0 | gp                  | awaiting clinical code migration to emis web | telephone call from relative/carer | 310 |
| 5  |   |                     |                                              |                                    |     |
| 6  | 0 | gp                  | awaiting clinical code migration to emis web | non-consultation data              | 309 |
| 7  |   |                     |                                              |                                    |     |
| 8  | 0 | nurse               | awaiting clinical code migration to emis web | telephone call from a patient      | 309 |
| 9  |   |                     |                                              |                                    |     |
| 10 | 0 | other care provider | awaiting clinical code migration to emis web | non-consultation data              | 306 |
| 11 |   |                     |                                              |                                    |     |
| 12 | 0 | other care provider | e-mail received from patient                 | e-mail received from patient       | 292 |
| 13 |   |                     |                                              |                                    |     |
| 14 | 0 | other care provider | awaiting clinical code migration to emis web | non-consultation medication data   | 289 |
| 15 |   |                     |                                              |                                    |     |
| 16 | 0 | nurse               | clinic note                                  | awaiting review                    | 286 |
| 17 |   |                     |                                              |                                    |     |
| 18 | 0 | dr                  | scanned document                             | scanned document                   | 285 |
| 19 |   |                     |                                              |                                    |     |
| 20 | 0 | other care provider | ooh report                                   | out of hours, non practice         | 283 |
| 21 |   |                     |                                              |                                    |     |
| 22 | 0 | other care provider | laboratory result                            | laboratory result                  | 282 |
| 23 |   |                     |                                              |                                    |     |
| 24 | 0 | gp                  | awaiting clinical code migration to emis web | discharge details                  | 281 |
| 25 |   |                     |                                              |                                    |     |
| 26 | 0 |                     | home visit note                              | home of patient                    | 277 |
| 27 |   |                     |                                              |                                    |     |
| 28 | 0 | nurse               | awaiting clinical code migration to emis web | inbound document                   | 276 |
| 29 |   |                     |                                              |                                    |     |
| 30 | 0 | other care provider | hospital inpatient report                    | hospital inpatient report          | 275 |
| 31 |   |                     |                                              |                                    |     |
| 32 | 0 | gp                  | mail to patient                              | mail to patient                    | 270 |
| 33 |   |                     |                                              |                                    |     |
| 34 | 0 | gp                  | awaiting clinical code migration to emis web | residential home visit note        | 266 |
| 35 |   |                     |                                              |                                    |     |
| 36 | 0 | other care provider | administration note                          | awaiting review                    | 265 |
| 37 |   |                     |                                              |                                    |     |
| 38 | 0 |                     | awaiting clinical code migration to emis web | acute visit                        | 263 |
| 39 |   |                     |                                              |                                    |     |
| 40 | 0 |                     | walk-in clinic                               | awaiting review                    | 260 |
| 41 |   |                     |                                              |                                    |     |
| 42 | 0 | dr                  | hospital outpatient report                   | hospital outpatient report         | 256 |
| 43 |   |                     |                                              |                                    |     |
| 44 | 0 | gp                  | awaiting clinical code migration to emis web | mail to patient                    | 249 |
| 45 |   |                     |                                              |                                    |     |
| 46 | 0 |                     | administration note                          | mjog                               | 248 |
| 47 |   |                     |                                              |                                    |     |
| 48 | 0 |                     | mail from patient                            | mail from patient                  | 248 |
| 49 |   |                     |                                              |                                    |     |
| 50 | 0 | gp                  | awaiting clinical code migration to emis web | letter from outpatients            | 247 |
| 51 |   |                     |                                              |                                    |     |
| 52 | 0 |                     | awaiting clinical code migration to emis web | discharge details                  | 244 |
| 53 |   |                     |                                              |                                    |     |
| 54 | 0 | nurse               | awaiting clinical code migration to emis web | mail to patient                    | 243 |
| 55 |   |                     |                                              |                                    |     |
| 56 | 0 | other care provider | awaiting clinical code migration to emis web | home visit note                    | 236 |
| 57 |   |                     |                                              |                                    |     |
| 58 | 0 | gp                  | home visit note                              | results recording                  | 235 |
| 59 |   |                     |                                              |                                    |     |
| 60 | 0 | dr                  | inbound document                             | inbound document                   | 234 |
|    |   |                     |                                              |                                    |     |
|    | 0 | gp                  | awaiting clinical code migration to emis web | other note                         | 230 |
|    |   |                     |                                              |                                    |     |
|    | 0 | gp                  | awaiting clinical code migration to emis web | patientchase insert                | 229 |
|    |   |                     |                                              |                                    |     |
|    | 0 | dr                  | awaiting clinical code migration to emis web | administration note                | 225 |
|    |   |                     |                                              |                                    |     |
|    | 0 | gp                  | awaiting clinical code migration to emis web | open door surgery                  | 222 |

|    |   |                     |                                                |                                    |     |
|----|---|---------------------|------------------------------------------------|------------------------------------|-----|
| 1  |   |                     | awaiting clinical code migration to emis web   | nhs direct report                  | 222 |
| 2  |   |                     |                                                |                                    |     |
| 3  |   |                     |                                                |                                    |     |
| 4  | 0 |                     | awaiting clinical code migration to emis web   | nhs direct report                  | 222 |
| 5  |   | other care provider | awaiting clinical code migration to emis web   | touchscreen                        | 216 |
| 6  | 0 |                     | awaiting clinical code migration to emis web   | touchscreen                        | 216 |
| 7  | 0 | gp                  | scanned document                               | docman                             | 213 |
| 8  |   |                     |                                                |                                    |     |
| 9  | 0 | nurse               | awaiting clinical code migration to emis web   | nursing home visit note            | 210 |
| 10 |   |                     |                                                |                                    |     |
| 11 | 0 | nurse               | administration note                            |                                    | 209 |
| 12 |   |                     |                                                |                                    |     |
| 13 | 0 | nurse               | awaiting clinical code migration to emis web   | externally entered note            | 209 |
| 14 |   |                     |                                                |                                    |     |
| 15 | 0 |                     | awaiting clinical code migration to emis web   | laboratory result                  | 199 |
| 16 | 0 |                     | hospital outpatient report                     | hospital                           | 197 |
| 17 |   |                     |                                                |                                    |     |
| 18 | 0 | other care provider | non-consultation medication data               | repeat issue                       | 196 |
| 19 |   |                     |                                                |                                    |     |
| 20 | 0 | other care provider | awaiting clinical code migration to emis web   | referral letter                    | 195 |
| 21 | 0 | nurse               | e-mail sent to patient                         | awaiting review                    | 191 |
| 22 |   |                     |                                                |                                    |     |
| 23 | 0 | nurse               | awaiting clinical code migration to emis web   | referral letter                    | 190 |
| 24 |   |                     |                                                |                                    |     |
| 25 | 0 | dr                  | awaiting clinical code migration to emis web   | telephone consultation             | 186 |
| 26 | 0 | nurse               | case conference                                | awaiting review                    | 185 |
| 27 |   |                     |                                                |                                    |     |
| 28 | 0 | other care provider | awaiting clinical code migration to emis web   | data transferred from other system | 184 |
| 29 |   |                     |                                                |                                    |     |
| 30 | 0 | gp                  | multidisciplinary team meeting without patient | awaiting review                    | 179 |
| 31 |   |                     |                                                |                                    |     |
| 32 | 0 | gp                  | awaiting clinical code migration to emis web   | clinic note                        | 176 |
| 33 |   |                     |                                                |                                    |     |
| 34 | 0 | other care provider | awaiting clinical code migration to emis web   | mjog                               | 175 |
| 35 |   |                     |                                                |                                    |     |
| 36 | 0 |                     | awaiting clinical code migration to emis web   | hospital inpatient report          | 168 |
| 37 |   |                     |                                                |                                    |     |
| 38 | 0 |                     | awaiting clinical code migration to emis web   | home visit note                    | 164 |
| 39 |   |                     |                                                |                                    |     |
| 40 | 0 |                     | awaiting clinical code migration to emis web   | online services message            | 163 |
| 41 |   |                     |                                                |                                    |     |
| 42 | 0 | other care provider | administration note                            |                                    | 162 |
| 43 |   |                     |                                                |                                    |     |
| 44 | 0 | nurse               | awaiting clinical code migration to emis web   | outbound referral                  | 159 |
| 45 |   |                     |                                                |                                    |     |
| 46 | 0 | other care provider | ooh report                                     | awaiting review                    | 156 |
| 47 |   |                     |                                                |                                    |     |
| 48 | 0 | gp                  | awaiting clinical code migration to emis web   | non-consultation medication data   | 152 |
| 49 |   |                     |                                                |                                    |     |
| 50 | 0 | nurse               | awaiting clinical code migration to emis web   | telephone call to relative/carer   | 152 |
| 51 |   |                     |                                                |                                    |     |
| 52 | 0 | other care provider | other note                                     | awaiting review                    | 149 |
| 53 |   |                     |                                                |                                    |     |
| 54 | 0 | dr                  | awaiting clinical code migration to emis web   | surgery consultation               | 148 |
| 55 |   |                     |                                                |                                    |     |
| 56 | 0 | nurse               | awaiting clinical code migration to emis web   | scanned document                   | 146 |
| 57 |   |                     |                                                |                                    |     |
| 58 | 0 | gp                  | administration note                            | repeat issue                       | 145 |
| 59 |   |                     |                                                |                                    |     |
| 60 | 0 |                     | awaiting clinical code migration to emis web   | open door surgery                  | 144 |

|   |                     |                                                     |                                    |     |
|---|---------------------|-----------------------------------------------------|------------------------------------|-----|
| 0 | other care provider | awaiting clinical code migration to emis web        | clinic note                        | 140 |
| 0 |                     | inbound referral                                    | awaiting review                    | 138 |
| 0 |                     | awaiting clinical code migration to emis web        | clinic note                        | 133 |
| 0 |                     | awaiting clinical code migration to emis web        | face to face consultation          | 129 |
| 0 | other care provider | non-consultation medication data                    | non-consultation medication data   | 124 |
| 0 | nurse               | awaiting clinical code migration to emis web        | residential home visit note        | 122 |
| 0 | nurse               | awaiting clinical code migration to emis web        | data transferred from other system | 121 |
| 0 | other care provider | e-mail sent to patient                              | awaiting review                    | 121 |
| 0 | gp                  | administration note                                 | outbound referral                  | 118 |
| 0 | nurse               | other note                                          |                                    | 117 |
| 0 | nurse               | awaiting clinical code migration to emis web        | nurse telephone triage             | 116 |
| 0 |                     | awaiting clinical code migration to emis web        | accident & emergency               | 116 |
| 0 | gp                  | other consultation medium used                      | data transferred from other system | 109 |
| 0 |                     | non-consultation medication data                    | non-consultation medication data   | 108 |
| 0 | nurse               | face to face consultation                           | triage                             | 104 |
| 0 | other care provider | awaiting clinical code migration to emis web        | acute visit                        | 102 |
| 0 | nurse               | awaiting clinical code migration to emis web        | telephone call from relative/carer | 100 |
| 0 |                     | extended hours consultation                         | out of hours, non practice         | 100 |
| 0 | nurse               | mail from patient                                   | mail from patient                  | 98  |
| 0 | other care provider | hospital outpatient report                          | hospital                           | 97  |
| 0 | dr                  | awaiting clinical code migration to emis web        | nursing home visit note            | 96  |
| 0 |                     | nurse telephone triage                              | nurse telephone triage             | 94  |
| 0 | nurse               | hospital inpatient report                           | hospital inpatient report          | 93  |
| 0 | other care provider | case conference                                     | awaiting review                    | 92  |
| 0 | gp                  | provision of general practitioner intermediate care | awaiting review                    | 91  |
| 0 | gp                  | walk-in clinic                                      |                                    | 91  |
| 0 |                     | hospital outpatient report                          | letter from outpatients            | 91  |
| 0 | other care provider | other note                                          |                                    | 89  |
| 0 | gp                  | administration note                                 | other note                         | 87  |
| 0 | other care provider | medication requested                                | awaiting review                    | 85  |
| 0 | dr                  | laboratory result                                   | results recording                  | 84  |
| 0 |                     | awaiting clinical code migration to emis web        | mail from patient                  | 84  |
| 0 |                     | awaiting clinical code migration to emis web        | health centre                      | 80  |
| 0 | gp                  | administration note                                 | inbound document                   | 76  |
| 0 | gp                  | other note                                          | awaiting review                    | 76  |

|    |   |            |                                      |                                    |    |
|----|---|------------|--------------------------------------|------------------------------------|----|
| 1  |   |            |                                      |                                    |    |
| 2  |   |            |                                      |                                    |    |
| 3  | 0 | nurse      | walk-in clinic                       |                                    | 76 |
| 4  | 0 |            | other note                           | non-consultation medication data   | 76 |
| 5  |   | other care | awaiting clinical code migration to  |                                    |    |
| 6  | 0 | provider   | emis web                             | nhs direct report                  | 73 |
| 7  |   |            | administration note                  | repeat issue                       | 73 |
| 8  | 0 | gp         | ooh report                           | awaiting review                    | 70 |
| 9  | 0 | gp         | weekly care home ward round          | awaiting review                    | 70 |
| 10 |   |            | awaiting clinical code migration to  |                                    |    |
| 11 | 0 |            | emis web                             | medicine management                | 70 |
| 12 |   | other care | awaiting clinical code migration to  |                                    |    |
| 13 | 0 | provider   | emis web                             | open door surgery                  | 69 |
| 14 |   | other care | awaiting clinical code migration to  |                                    |    |
| 15 | 0 | provider   | emis web                             | telephone encounter                | 69 |
| 16 |   |            | medication requested                 | awaiting review                    | 68 |
| 17 | 0 | other care | awaiting clinical code migration to  |                                    |    |
| 18 | 0 | provider   | emis web                             | telephone call to relative/carer   | 65 |
| 19 |   |            | awaiting clinical code migration to  |                                    |    |
| 20 | 0 | dr         | emis web                             | repeat issue                       | 64 |
| 21 |   | gp         | non-consultation medication data     | repeat issue                       | 64 |
| 22 | 0 | other care | awaiting clinical code migration to  |                                    |    |
| 23 | 0 | provider   | emis web                             | telephone call from a patient      | 64 |
| 24 |   | gp         | clinic note                          | nhs direct report                  | 62 |
| 25 | 0 | gp         | non-consultation medication data     | medicine management                | 61 |
| 26 |   | other care | awaiting clinical code migration to  |                                    |    |
| 27 | 0 | provider   | emis web                             | letter from outpatients            | 61 |
| 28 |   | gp         | hospital outpatient report           | letter from outpatients            | 60 |
| 29 | 0 | gp         | non-consultation data                | data transferred from other system | 57 |
| 30 |   | nurse      | awaiting clinical code migration to  |                                    |    |
| 31 | 0 | gp         | emis web                             | enterprise consultation            | 57 |
| 32 |   | gp         | outbound referral                    | referral letter                    | 55 |
| 33 |   | other care | repeat prescription                  | medicine management                | 55 |
| 34 | 0 | provider   |                                      |                                    |    |
| 35 | 0 | nurse      | seen in influenza vaccination clinic | awaiting review                    | 54 |
| 36 |   |            | administration note                  | results recording                  | 54 |
| 37 |   |            | awaiting clinical code migration to  |                                    |    |
| 38 | 0 |            | emis web                             | telephone call from relative/carer | 54 |
| 39 |   | gp         | awaiting clinical code migration to  |                                    |    |
| 40 | 0 | gp         | emis web                             | hospital outpatient report         | 53 |
| 41 |   | gp         | gp surgery                           |                                    | 53 |
| 42 | 0 | gp         | third party consultation             | out of hours, non practice         | 51 |
| 43 |   |            | awaiting clinical code migration to  |                                    |    |
| 44 | 0 |            | emis web                             | telephone call to relative/carer   | 51 |
| 45 |   |            | clinic note                          | out of hours, non practice         | 51 |
| 46 | 0 |            | face to face consultation            | primary care centre                | 51 |
| 47 |   | gp         | awaiting clinical code migration to  |                                    |    |
| 48 | 0 | gp         | emis web                             | laboratory result                  | 50 |
| 49 |   | nurse      | non-consultation medication data     | repeat issue                       | 48 |
| 50 |   |            | awaiting clinical code migration to  |                                    |    |
| 51 | 0 |            | emis web                             | other note                         | 48 |
| 52 |   |            | face to face consultation            | triage                             | 48 |
| 53 | 0 | gp         | progress report                      | nhs direct report                  | 47 |
| 54 |   | other care | ooh report                           | nhs direct report                  | 47 |
| 55 | 0 | provider   |                                      |                                    |    |
| 56 |   |            |                                      |                                    |    |
| 57 |   |            |                                      |                                    |    |
| 58 |   |            |                                      |                                    |    |
| 59 |   |            |                                      |                                    |    |
| 60 |   |            |                                      |                                    |    |



|   |                     |                                              |                                    |    |
|---|---------------------|----------------------------------------------|------------------------------------|----|
| 0 | nurse               | awaiting clinical code migration to emis web | non-consultation data              | 46 |
| 0 |                     | awaiting clinical code migration to emis web | nursing home                       | 46 |
| 0 | gp                  | awaiting clinical code migration to emis web | mail from patient                  | 45 |
| 0 | nurse               | awaiting clinical code migration to emis web | discussion with colleague          | 45 |
| 0 |                     | awaiting clinical code migration to emis web | e-mail received from patient       | 45 |
| 0 | nurse               | awaiting clinical code migration to emis web | medicine management                | 43 |
| 0 | nurse               | medication requested                         | repeat issue                       | 42 |
| 0 | dr                  | mail to patient                              | mail to patient                    | 40 |
| 0 | gp                  | awaiting clinical code migration to emis web | encompass message                  | 39 |
| 0 | gp                  | other note                                   | data transferred from other system | 39 |
| 0 | nurse               | awaiting clinical code migration to emis web | clinic note                        | 39 |
| 0 | nurse               | awaiting clinical code migration to emis web | laboratory result                  | 39 |
| 0 | other care provider | awaiting clinical code migration to emis web | other note                         | 39 |
| 0 | other care provider | medication requested                         | repeat issue                       | 38 |
| 0 | gp                  | administration note                          | non-consultation data              | 37 |
| 0 | other care provider | mail from patient                            | mail from patient                  | 37 |
| 0 | dr                  | awaiting clinical code migration to emis web | results recording                  | 36 |
| 0 | gp                  | awaiting clinical code migration to emis web | e-mail received from patient       | 36 |
| 0 | nurse               | awaiting clinical code migration to emis web | walk-in centre                     | 36 |
| 0 | other care provider | awaiting clinical code migration to emis web | gp2gp import                       | 36 |
| 0 |                     | administration note                          | mail to patient                    | 36 |
| 0 | gp                  | awaiting clinical code migration to emis web | home of patient                    | 35 |
| 0 | gp                  | awaiting clinical code migration to emis web | casualty attendance                | 34 |
| 0 | gp                  | inbound document                             | letter from outpatients            | 34 |
| 0 | other care provider | awaiting clinical code migration to emis web | outbound referral                  | 34 |
| 0 | other care provider | extended hours consultation                  | out of hours, non practice         | 34 |
| 0 | gp                  | awaiting clinical code migration to emis web | telephone encounter                | 33 |
| 0 | gp                  | seen in hospital ward                        | awaiting review                    | 33 |
| 0 |                     | other note                                   | non-consultation data              | 33 |
| 0 | nurse               | other note                                   | awaiting review                    | 32 |
| 0 | other care provider | awaiting clinical code migration to emis web | discussion with colleague          | 32 |
| 0 |                     | discussion with other professional           | awaiting review                    | 32 |



|    |   |            |                                      |                                     |    |
|----|---|------------|--------------------------------------|-------------------------------------|----|
| 1  |   |            |                                      |                                     |    |
| 2  |   |            |                                      |                                     |    |
| 3  |   |            | multidisciplinary team meeting       |                                     |    |
| 4  | 0 |            | without patient                      | awaiting review                     | 32 |
| 5  | 0 |            | children's home visit note           |                                     | 31 |
| 6  |   | other care |                                      |                                     |    |
| 7  | 0 | provider   | laboratory result                    | results recording                   | 30 |
| 8  |   |            | awaiting clinical code migration to  |                                     |    |
| 9  | 0 |            | emis web                             | casualty attendance                 | 30 |
| 10 |   |            | extended hours consultation          | nhs direct report                   | 30 |
| 11 | 0 | nurse      | administration note                  | awaiting review                     | 29 |
| 12 |   |            | awaiting clinical code migration to  |                                     |    |
| 13 | 0 | nurse      | emis web                             | letter from outpatients             | 29 |
| 14 |   |            | awaiting clinical code migration to  |                                     |    |
| 15 | 0 | nurse      | emis web                             | open door surgery                   | 29 |
| 16 | 0 | nurse      | discussion with other professional   | awaiting review                     | 29 |
| 17 | 0 | nurse      | ooh report                           | out of hours, non practice          | 29 |
| 18 | 0 |            | face to face consultation            | treatment room                      | 29 |
| 19 |   |            | email received from carer            | awaiting review                     | 28 |
| 20 | 0 | gp         |                                      |                                     |    |
| 21 |   | other care | awaiting clinical code migration to  |                                     |    |
| 22 | 0 | provider   | emis web                             | telephone triage encounter          | 28 |
| 23 |   |            | administration note                  | touchscreen                         | 28 |
| 24 |   |            | awaiting clinical code migration to  |                                     |    |
| 25 | 0 | nurse      | emis web                             | encompass message                   | 27 |
| 26 |   |            | awaiting clinical code migration to  |                                     |    |
| 27 | 0 | nurse      | emis web                             | nursing home                        | 27 |
| 28 |   |            | third party consultation             | out of hours, non practice          | 27 |
| 29 |   |            | awaiting clinical code migration to  |                                     |    |
| 30 | 0 | gp         | emis web                             | follow-up/routine visit             | 26 |
| 31 |   | other care |                                      |                                     |    |
| 32 | 0 | provider   | emergency consultation               | accident & emergency                | 26 |
| 33 |   |            | hospital outpatient report           | nhs direct report                   | 25 |
| 34 |   | gp         |                                      |                                     |    |
| 35 | 0 | other care | awaiting clinical code migration to  |                                     |    |
| 36 |   | provider   | emis web                             | telephone call from relative/carers | 23 |
| 37 |   | other care |                                      |                                     |    |
| 38 | 0 | provider   | outbound referral                    | referral letter                     | 23 |
| 39 |   |            | externally entered note              | scanned document                    | 23 |
| 40 |   |            | multidisciplinary team meeting       |                                     |    |
| 41 | 0 | nurse      | without patient                      | awaiting review                     | 22 |
| 42 |   |            | other consultation medium used       | data transferred from other system  | 22 |
| 43 |   |            | awaiting clinical code migration to  |                                     |    |
| 44 | 0 | dr         | emis web                             | outbound referral                   | 21 |
| 45 |   |            | seen in influenza vaccination clinic | awaiting review                     | 21 |
| 46 |   |            | awaiting clinical code migration to  |                                     |    |
| 47 | 0 | nurse      | emis web                             | other note                          | 21 |
| 48 |   |            | ooh report                           | nhs direct report                   | 21 |
| 49 |   |            | awaiting clinical code migration to  |                                     |    |
| 50 | 0 | dr         | emis web                             | inbound document                    | 20 |
| 51 |   |            | awaiting clinical code migration to  |                                     |    |
| 52 | 0 | gp         | emis web                             | day case report                     | 20 |
| 53 |   |            | seen by general practitioner with    |                                     |    |
| 54 |   | other care | special interest in ear nose and     |                                     |    |
| 55 |   | provider   | throat disorders                     | data transferred from other system  | 20 |
| 56 |   |            | emergency consultation               | accident & emergency                | 20 |
| 57 |   |            | awaiting clinical code migration to  |                                     |    |
| 58 | 0 | gp         | emis web                             | online services message             | 19 |
| 59 |   |            |                                      |                                     |    |

|    |   |                     |                                                                                     |                                    |    |
|----|---|---------------------|-------------------------------------------------------------------------------------|------------------------------------|----|
| 1  |   |                     |                                                                                     |                                    |    |
| 2  |   |                     |                                                                                     |                                    |    |
| 3  | 0 | gp                  | hospital outpatient report                                                          | third party consultation           | 19 |
| 4  | 0 | nurse               | repeat prescription                                                                 | awaiting review                    | 19 |
| 5  |   |                     | awaiting clinical code migration to emis web                                        |                                    |    |
| 6  | 0 |                     |                                                                                     | walk in centre                     | 19 |
| 7  |   |                     |                                                                                     |                                    |    |
| 8  | 0 | dr                  | hospital inpatient report                                                           | hospital inpatient report          | 18 |
| 9  |   |                     |                                                                                     |                                    |    |
| 10 | 0 | other care provider | awaiting clinical code migration to emis web                                        | residential home visit note        | 18 |
| 11 |   |                     |                                                                                     |                                    |    |
| 12 | 0 | other care provider | walk-in clinic                                                                      |                                    | 18 |
| 13 |   |                     |                                                                                     |                                    |    |
| 14 | 0 |                     | awaiting clinical code migration to emis web                                        | residential home visit note        | 18 |
| 15 |   |                     |                                                                                     |                                    |    |
| 16 | 0 |                     | awaiting clinical code migration to emis web                                        | telephone triage encounter         | 18 |
| 17 |   |                     |                                                                                     |                                    |    |
| 18 | 0 | dr                  | outbound referral                                                                   | outbound referral                  | 17 |
| 19 |   |                     |                                                                                     |                                    |    |
| 20 | 0 | gp                  | ooh report                                                                          | third party consultation           | 17 |
| 21 |   |                     |                                                                                     |                                    |    |
| 22 | 0 | gp                  | other consultation medium used                                                      | nhs direct report                  | 17 |
| 23 |   |                     |                                                                                     |                                    |    |
| 24 | 0 | gp                  | radiology result                                                                    | awaiting review                    | 17 |
| 25 |   |                     |                                                                                     |                                    |    |
| 26 | 0 | gp                  | telephone consultation                                                              | telephone call from relative/carer | 17 |
| 27 |   |                     |                                                                                     |                                    |    |
| 28 | 0 | other care provider | awaiting clinical code migration to emis web                                        | enterprise consultation            | 17 |
| 29 |   |                     |                                                                                     |                                    |    |
| 30 | 0 | other care provider | walk-in clinic                                                                      | walk in centre                     | 17 |
| 31 |   |                     |                                                                                     |                                    |    |
| 32 | 0 |                     | administration note                                                                 | referral letter                    | 17 |
| 33 |   |                     |                                                                                     |                                    |    |
| 34 | 0 | dr                  | other note                                                                          | other note                         | 16 |
| 35 |   |                     |                                                                                     |                                    |    |
| 36 | 0 | other care provider | awaiting clinical code migration to emis web                                        | nursing home visit note            | 16 |
| 37 |   |                     |                                                                                     |                                    |    |
| 38 | 0 | dr                  | medication requested                                                                | repeat issue                       | 15 |
| 39 |   |                     |                                                                                     |                                    |    |
| 40 | 0 | other care provider | administration note                                                                 | inbound document                   | 15 |
| 41 |   |                     |                                                                                     |                                    |    |
| 42 | 0 | other care provider | awaiting clinical code migration to emis web                                        | out of hours, non practice         | 15 |
| 43 |   |                     |                                                                                     |                                    |    |
| 44 | 0 |                     | non-consultation data                                                               | data transferred from other system | 15 |
| 45 |   |                     |                                                                                     |                                    |    |
| 46 | 0 | other care provider | face to face consultation                                                           | triage                             | 15 |
| 47 |   |                     |                                                                                     |                                    |    |
| 48 | 0 | dr                  | awaiting clinical code migration to emis web                                        | telephone call to a patient        | 14 |
| 49 |   |                     |                                                                                     |                                    |    |
| 50 | 0 | dr                  | externally entered note                                                             | externally entered note            | 14 |
| 51 |   |                     |                                                                                     |                                    |    |
| 52 | 0 | gp                  | hospital inpatient report                                                           | discharge details                  | 14 |
| 53 |   |                     |                                                                                     |                                    |    |
| 54 | 0 | gp                  | seen by general practitioner with special interest in ear nose and throat disorders | data transferred from other system | 14 |
| 55 |   |                     |                                                                                     |                                    |    |
| 56 | 0 | other care provider | administration note                                                                 | scanned document                   | 14 |
| 57 |   |                     |                                                                                     |                                    |    |
| 58 | 0 | other care provider | discussion with other professional                                                  | awaiting review                    | 14 |
| 59 |   |                     |                                                                                     |                                    |    |
| 60 | 0 |                     | awaiting clinical code migration to emis web                                        | out of hours, practice             | 14 |
|    |   |                     |                                                                                     |                                    |    |
|    | 0 |                     | externally entered note                                                             |                                    | 14 |
|    |   |                     |                                                                                     |                                    |    |
|    | 0 | dr                  | telephone call to relative/carer                                                    | telephone call to relative/carer   | 13 |
|    |   |                     |                                                                                     |                                    |    |
|    | 0 | nurse               | awaiting clinical code migration to emis web                                        | nhs direct report                  | 13 |
|    |   |                     |                                                                                     |                                    |    |
|    | 0 | nurse               | awaiting clinical code migration to emis web                                        | out of hours, non practice         | 13 |
|    |   |                     |                                                                                     |                                    |    |
|    | 0 |                     | hospital inpatient note                                                             | awaiting review                    | 13 |

1  
2  
3  
4  
5  
6  
7  
8  
9  
10  
11  
12  
13  
14  
15  
16  
17  
18  
19  
20  
21  
22  
23  
24  
25  
26  
27  
28  
29  
30  
31  
32  
33  
34  
35  
36  
37  
38  
39  
40  
41  
42  
43  
44  
45  
46  
47  
48  
49  
50  
51  
52  
53  
54  
55  
56  
57  
58  
59  
60

|   |                     |                                                     |                                    |      |
|---|---------------------|-----------------------------------------------------|------------------------------------|------|
| 0 |                     | repeat prescription                                 | awaiting review                    | 13   |
| 0 | gp                  | other note                                          | encompass message                  | 12   |
| 0 | nurse               | awaiting clinical code migration to emis web        | hospital outpatient report         | 12   |
| 0 | other care provider | awaiting clinical code migration to emis web        | accident & emergency               | 12   |
| 0 | nurse               | other note                                          | encompass message                  | 11   |
| 0 | nurse               | repeat prescription                                 | repeat issue                       | 11   |
| 0 | other care provider | seen in influenza vaccination clinic                | awaiting review                    | 11   |
| 0 |                     | awaiting clinical code migration to emis web        | discussion with colleague          | 11   |
| 0 |                     | awaiting clinical code migration to emis web        | hospital outpatient consultation   | 11   |
| 0 |                     | awaiting clinical code migration to emis web        | walk-in clinic                     | 11   |
| 0 |                     | non-consultation medication data                    | medicine management                | 11   |
| 0 |                     | provision of general practitioner intermediate care | awaiting review                    | 10   |
| 0 | dr                  | clinic note                                         | awaiting review                    | < 10 |
| 0 | other care provider | ooh report                                          | out of hours centre                | < 10 |
| 0 |                     | administration note                                 | non-consultation data              | < 10 |
| 0 |                     | clinic note                                         | nhs direct report                  | < 10 |
| 0 |                     | telephone follow-up                                 | awaiting review                    | < 10 |
| 0 | gp                  | administration note                                 | clinic note                        | < 10 |
| 0 | gp                  | progress report                                     | awaiting review                    | < 10 |
| 0 | nurse               | awaiting clinical code migration to emis web        | acute visit                        | < 10 |
| 0 | other care provider | multidisciplinary team meeting without patient      | awaiting review                    | < 10 |
| 0 |                     | administration note                                 | other note                         | < 10 |
| 0 | dr                  | awaiting clinical code migration to emis web        | home visit note                    | < 10 |
| 0 | gp                  | hospital inpatient note                             | day case report                    | < 10 |
| 0 | gp                  | inbound document                                    | discharge details                  | < 10 |
| 0 | nurse               | awaiting clinical code migration to emis web        | follow-up/routine visit            | < 10 |
| 0 | other care provider | awaiting clinical code migration to emis web        | discharge details                  | < 10 |
| 0 |                     | awaiting clinical code migration to emis web        | enterprise consultation            | < 10 |
| 0 |                     | awaiting clinical code migration to emis web        | nursing home visit note            | < 10 |
| 0 |                     | email received from carer                           | awaiting review                    | < 10 |
| 0 |                     | ooh report                                          | out of hours, practice             | < 10 |
| 0 |                     | other note                                          | data transferred from other system | < 10 |
| 0 |                     | outbound referral                                   | referral letter                    | < 10 |
| 0 |                     | radiology result                                    | awaiting review                    | < 10 |
| 0 | dr                  | gp surgery                                          | awaiting review                    | < 10 |
| 0 | gp                  | routine consultation                                | repeat issue                       | < 10 |
| 0 | nurse               | email received from carer                           | awaiting review                    | < 10 |
| 0 | nurse               | non-consultation data                               | data transferred from other system | < 10 |

|    |   |                     |                                              |                                    |      |
|----|---|---------------------|----------------------------------------------|------------------------------------|------|
| 1  |   |                     |                                              |                                    |      |
| 2  |   |                     |                                              |                                    |      |
| 3  | 0 | nurse               | scanned document                             | docman                             | < 10 |
| 4  |   | other care provider | awaiting clinical code migration to emis web | home of patient                    | < 10 |
| 5  | 0 | other care provider | hospital outpatient report                   | letter from outpatients            | < 10 |
| 6  |   |                     |                                              |                                    |      |
| 7  | 0 | dr                  | discussion with colleague                    | discussion with colleague          | < 10 |
| 8  |   |                     |                                              |                                    |      |
| 9  | 0 | gp                  | administration note                          | discussion with colleague          | < 10 |
| 10 |   |                     |                                              |                                    |      |
| 11 | 0 | gp                  | awaiting clinical code migration to emis web | out of hours, practice             | < 10 |
| 12 |   |                     |                                              |                                    |      |
| 13 | 0 | gp                  | clinic note                                  | out of hours, non practice         | < 10 |
| 14 |   |                     |                                              |                                    |      |
| 15 | 0 | gp                  | ooh report                                   | out of hours, practice             | < 10 |
| 16 |   |                     |                                              |                                    |      |
| 17 | 0 | gp                  | seen in diabetic clinic                      | awaiting review                    | < 10 |
| 18 |   |                     |                                              |                                    |      |
| 19 | 0 | gp                  | sms text message sent to patient             | awaiting review                    | < 10 |
| 20 |   |                     |                                              |                                    |      |
| 21 | 0 | nurse               | administration note                          | discussion with colleague          | < 10 |
| 22 |   | other care provider | awaiting clinical code migration to emis web | nursing home                       | < 10 |
| 23 |   | other care provider | awaiting clinical code migration to emis web | online services message            | < 10 |
| 24 |   |                     | awaiting clinical code migration to emis web | bulk operation                     | < 10 |
| 25 | 0 |                     | non-consultation data                        | touchscreen                        | < 10 |
| 26 |   |                     |                                              |                                    |      |
| 27 | 0 | dr                  | awaiting clinical code migration to emis web | hospital outpatient report         | < 10 |
| 28 |   |                     |                                              |                                    |      |
| 29 | 0 | dr                  | awaiting clinical code migration to emis web | other                              | < 10 |
| 30 |   |                     |                                              |                                    |      |
| 31 | 0 | dr                  | awaiting clinical code migration to emis web | third party consultation           | < 10 |
| 32 |   |                     |                                              |                                    |      |
| 33 | 0 | dr                  | clinic note                                  | clinic note                        | < 10 |
| 34 |   |                     |                                              |                                    |      |
| 35 | 0 | dr                  | non-consultation data                        | non-consultation data              | < 10 |
| 36 |   |                     |                                              |                                    |      |
| 37 | 0 | gp                  | awaiting clinical code migration to emis web | hospital inpatient report          | < 10 |
| 38 |   |                     |                                              |                                    |      |
| 39 | 0 | gp                  | clinic note                                  | community clinic                   | < 10 |
| 40 |   |                     |                                              |                                    |      |
| 41 | 0 | nurse               | administration note                          | non-consultation data              | < 10 |
| 42 |   |                     |                                              |                                    |      |
| 43 | 0 | nurse               | awaiting clinical code migration to emis web | non-consultation medication data   | < 10 |
| 44 |   | other care provider | externally entered note                      | data transferred from other system | < 10 |
| 45 |   | other care provider | gp surgery                                   |                                    | < 10 |
| 46 |   | other care provider | other note                                   | referral letter                    | < 10 |
| 47 |   |                     |                                              |                                    |      |
| 48 | 0 |                     | awaiting clinical code migration to emis web | nurseries/playgroup                | < 10 |
| 49 |   |                     |                                              |                                    |      |
| 50 | 0 |                     | hospital outpatient report                   | third party consultation           | < 10 |
| 51 |   |                     |                                              |                                    |      |
| 52 | 0 | gp                  | nurse telephone triage                       | nurse telephone triage             | < 10 |
| 53 |   |                     |                                              |                                    |      |
| 54 | 0 | dr                  | awaiting clinical code migration to emis web | discussion with colleague          | < 10 |
| 55 |   |                     |                                              |                                    |      |
| 56 | 0 | dr                  | awaiting clinical code migration to emis web | medicine management                | < 10 |
| 57 |   |                     |                                              |                                    |      |
| 58 | 0 | dr                  | awaiting clinical code migration to emis web | residential home visit note        | < 10 |
| 59 |   |                     |                                              |                                    |      |
| 60 | 0 | dr                  | e-mail received from patient                 | e-mail received from patient       | < 10 |
|    |   |                     |                                              |                                    |      |
|    | 0 | dr                  | telephone call from relative/carer           | telephone call from relative/carer | < 10 |

|   |                     |                                              |                                    |      |
|---|---------------------|----------------------------------------------|------------------------------------|------|
| 0 | gp                  | awaiting clinical code migration to emis web | walk-in centre                     | < 10 |
| 0 | gp                  | extended hours consultation                  | out of hours, non practice         | < 10 |
| 0 | gp                  | externally entered note                      |                                    | < 10 |
| 0 | gp                  | other consultation medium used               | other note                         | < 10 |
| 0 | gp                  | telephone consultation                       | telephone call to relative/carer   | < 10 |
| 0 | nurse               | awaiting clinical code migration to emis web | telephone encounter                | < 10 |
| 0 | nurse               | medication requested                         | awaiting review                    | < 10 |
| 0 | nurse               | telephone follow-up                          | awaiting review                    | < 10 |
| 0 | other care provider | awaiting clinical code migration to emis web | e-mail received from patient       | < 10 |
| 0 | other care provider | awaiting clinical code migration to emis web | mail from patient                  | < 10 |
| 0 | other care provider | awaiting clinical code migration to emis web | out of hours, practice             | < 10 |
| 0 | other care provider | other note                                   | data transferred from other system | < 10 |
| 0 |                     | awaiting clinical code migration to emis web | day case report                    | < 10 |
| 0 |                     | awaiting clinical code migration to emis web | encompass message                  | < 10 |
| 0 |                     | e-mail encounter to carer                    | awaiting review                    | < 10 |
| 0 |                     | walk-in clinic                               | walk in centre                     | < 10 |
| 0 | dr                  | awaiting clinical code migration to emis web | non-consultation data              | < 10 |
| 0 | dr                  | awaiting clinical code migration to emis web | other note                         | < 10 |
| 0 | dr                  | e-mail sent to patient                       | awaiting review                    | < 10 |
| 0 | gp                  | email received from third party              | awaiting review                    | < 10 |
| 0 | gp                  | hospital inpatient note                      | awaiting review                    | < 10 |
| 0 | gp                  | night visit note                             | night visit                        | < 10 |
| 0 | gp                  | other note                                   | third party consultation           | < 10 |
| 0 | gp                  | telephone encounter                          | telephone call to relative/carer   | < 10 |
| 0 | gp                  | telephone follow-up                          | awaiting review                    | < 10 |
| 0 | nurse               | administration note                          | referral letter                    | < 10 |
| 0 | nurse               | awaiting clinical code migration to emis web | urgent consultation                | < 10 |
| 0 | nurse               | seen in asthma clinic                        | awaiting review                    | < 10 |
| 0 | nurse               | seen in hospital ward                        | awaiting review                    | < 10 |
| 0 | nurse               | telephone consultation                       | telephone call to relative/carer   | < 10 |
| 0 | other care provider | administration note                          | other note                         | < 10 |
| 0 | other care provider | administration note                          | referral letter                    | < 10 |
| 0 | other care provider | administration note                          | repeat issue                       | < 10 |
| 0 | other care provider | administration note                          | results recording                  | < 10 |
| 0 | other care provider | awaiting clinical code migration to emis web | casualty attendance                | < 10 |
| 0 | other care provider | awaiting clinical code migration to emis web | diabetic clinic                    | < 10 |

|    |   |                     |                                              |                                         |
|----|---|---------------------|----------------------------------------------|-----------------------------------------|
| 1  |   |                     |                                              |                                         |
| 2  |   |                     |                                              |                                         |
| 3  |   |                     |                                              |                                         |
| 4  | 0 | other care provider | awaiting clinical code migration to emis web | encompass message < 10                  |
| 5  | 0 | other care provider | clinic note                                  | nhs direct report < 10                  |
| 6  | 0 | other care provider | seen in diabetic clinic                      | awaiting review < 10                    |
| 7  | 0 |                     | awaiting clinical code migration to emis web | other report < 10                       |
| 8  | 0 |                     | child in need meeting                        | awaiting review < 10                    |
| 9  | 0 |                     | hospital inpatient report                    | hospital inpatient < 10                 |
| 10 | 0 |                     | progress report                              | nhs direct report < 10                  |
| 11 | 0 |                     | repeat prescription                          | non-consultation medication data < 10   |
| 12 | 0 |                     | weekly care home ward round                  | awaiting review < 10                    |
| 13 | 0 | dr                  | awaiting clinical code migration to emis web | non-consultation medication data < 10   |
| 14 | 0 | dr                  | awaiting clinical code migration to emis web | telephone call from a patient < 10      |
| 15 | 0 | dr                  | awaiting clinical code migration to emis web | telephone call from relative/carer < 10 |
| 16 | 0 | dr                  | awaiting clinical code migration to emis web | telephone call to relative/carer < 10   |
| 17 | 0 | gp                  | awaiting clinical code migration to emis web | night visit , practice < 10             |
| 18 | 0 | gp                  | awaiting clinical code migration to emis web | walk-in clinic < 10                     |
| 19 | 0 | gp                  | non-consultation medication data             | non-consultation medication data < 10   |
| 20 | 0 | gp                  | other consultation medium used               | referral letter < 10                    |
| 21 | 0 | gp                  | other note                                   | non-consultation data < 10              |
| 22 | 0 | gp                  | other note                                   | non-consultation medication data < 10   |
| 23 | 0 | gp                  | seen in baby clinic                          | awaiting review < 10                    |
| 24 | 0 | gp                  | telephone encounter                          | telephone call from relative/carer < 10 |
| 25 | 0 | nurse               | administration note                          | clinic note < 10                        |
| 26 | 0 | nurse               | administration note                          | laboratory result < 10                  |
| 27 | 0 | nurse               | awaiting clinical code migration to emis web | casualty attendance < 10                |
| 28 | 0 | nurse               | awaiting clinical code migration to emis web | patientchase insert < 10                |
| 29 | 0 | nurse               | clinic note                                  | community clinic < 10                   |
| 30 | 0 | nurse               | extended hours consultation                  | out of hours, non practice < 10         |
| 31 | 0 | nurse               | externally entered note                      | data transferred from other system < 10 |
| 32 | 0 | nurse               | first attendance face to face                | awaiting review < 10                    |
| 33 | 0 | nurse               | hospital inpatient note                      | awaiting review < 10                    |
| 34 | 0 | nurse               | ooh report                                   | out of hours, practice < 10             |
| 35 | 0 | nurse               | other consultation medium used               | data transferred from other system < 10 |
| 36 | 0 | nurse               | other note                                   | data transferred from other system < 10 |
| 37 | 0 | nurse               | other note                                   | referral letter < 10                    |
| 38 | 0 | nurse               | outbound referral                            | referral letter < 10                    |
| 39 | 0 | nurse               | patient initiated enc. nos                   | awaiting review < 10                    |
| 40 | 0 | nurse               | telephone consultation                       | telephone call from relative/carer < 10 |
| 41 | 0 | nurse               | telephone encounter                          | telephone call to relative/carer < 10   |
| 42 | 0 | nurse               | weekly care home ward round                  | awaiting review < 10                    |
| 43 | 0 | nurse               | weekly care home ward round                  | awaiting review < 10                    |

|    |   |                     |                                                     |                                    |      |
|----|---|---------------------|-----------------------------------------------------|------------------------------------|------|
| 1  |   |                     |                                                     |                                    |      |
| 2  |   |                     |                                                     |                                    |      |
| 3  |   |                     |                                                     |                                    |      |
| 4  | 0 | other care provider | administration note                                 | mail to patient                    | < 10 |
| 5  |   |                     |                                                     |                                    |      |
| 6  | 0 | other care provider | awaiting clinical code migration to emis web        | hospital inpatient report          | < 10 |
| 7  |   |                     |                                                     |                                    |      |
| 8  | 0 | other care provider | awaiting clinical code migration to emis web        | hospital outpatient report         | < 10 |
| 9  |   |                     |                                                     |                                    |      |
| 10 | 0 | other care provider | awaiting clinical code migration to emis web        | laboratory result                  | < 10 |
| 11 |   |                     |                                                     |                                    |      |
| 12 | 0 | other care provider | clinic note                                         | community clinic                   | < 10 |
| 13 |   |                     |                                                     |                                    |      |
| 14 | 0 | other care provider | first attendance face to face                       | awaiting review                    | < 10 |
| 15 |   |                     |                                                     |                                    |      |
| 16 | 0 | other care provider | inbound referral                                    | awaiting review                    | < 10 |
| 17 |   |                     |                                                     |                                    |      |
| 18 | 0 | other care provider | non-consultation data                               | data transferred from other system | < 10 |
| 19 |   |                     |                                                     |                                    |      |
| 20 | 0 | other care provider | ooh report                                          | out of hours, non practice         | < 10 |
| 21 |   |                     |                                                     |                                    |      |
| 22 | 0 | other care provider | telephone encounter                                 | awaiting review                    | < 10 |
| 23 |   |                     |                                                     |                                    |      |
| 24 | 0 |                     | awaiting clinical code migration to emis web        | follow-up/routine visit            | < 10 |
| 25 |   |                     |                                                     |                                    |      |
| 26 | 0 |                     | awaiting clinical code migration to emis web        | letter                             | < 10 |
| 27 |   |                     |                                                     |                                    |      |
| 28 | 0 |                     | awaiting clinical code migration to emis web        | minor injuries unit                | < 10 |
| 29 |   |                     |                                                     |                                    |      |
| 30 | 0 |                     | awaiting clinical code migration to emis web        | secretary                          | < 10 |
| 31 |   |                     |                                                     |                                    |      |
| 32 | 0 |                     | email received from third party                     | awaiting review                    | < 10 |
| 33 |   |                     |                                                     |                                    |      |
| 34 | 0 |                     | gp surgery                                          | non-consultation data              | < 10 |
| 35 |   |                     |                                                     |                                    |      |
| 36 | 0 |                     | hospital inpatient report                           | awaiting review                    | < 10 |
| 37 |   |                     |                                                     |                                    |      |
| 38 | 0 |                     | hospital inpatient report                           | discharge details                  | < 10 |
| 39 |   |                     |                                                     |                                    |      |
| 40 | 0 |                     | multidisciplinary team meeting with patient         | awaiting review                    | < 10 |
| 41 |   |                     |                                                     |                                    |      |
| 42 | 0 |                     | night visit note                                    | night visit, local rota            | < 10 |
| 43 |   |                     |                                                     |                                    |      |
| 44 | 0 |                     | provision of general practitioner intermediate care | gp2gp import                       | < 10 |
| 45 |   |                     |                                                     |                                    |      |
| 46 | 0 |                     | telephone triage encounter                          | nhs direct report                  | < 10 |
| 47 |   |                     |                                                     |                                    |      |
| 48 | 0 |                     | third party consultation                            | third party                        | < 10 |
| 49 |   |                     |                                                     |                                    |      |
| 50 | 0 | other care provider | nurse telephone triage                              | nurse telephone triage             | < 10 |
| 51 |   |                     |                                                     |                                    |      |
| 52 |   |                     |                                                     |                                    |      |
| 53 |   |                     |                                                     |                                    |      |
| 54 |   |                     |                                                     |                                    |      |
| 55 |   |                     |                                                     |                                    |      |
| 56 |   |                     |                                                     |                                    |      |
| 57 |   |                     |                                                     |                                    |      |
| 58 |   |                     |                                                     |                                    |      |
| 59 |   |                     |                                                     |                                    |      |
| 60 |   |                     |                                                     |                                    |      |



### Annex 3: a list of terms excluded to help identify true vaccinations in the data

Figure A3.1 Consultation rates including and excluding influenza vaccine in CPRD Aurum data, 01 Jan 2019 – 30 Jan 2021

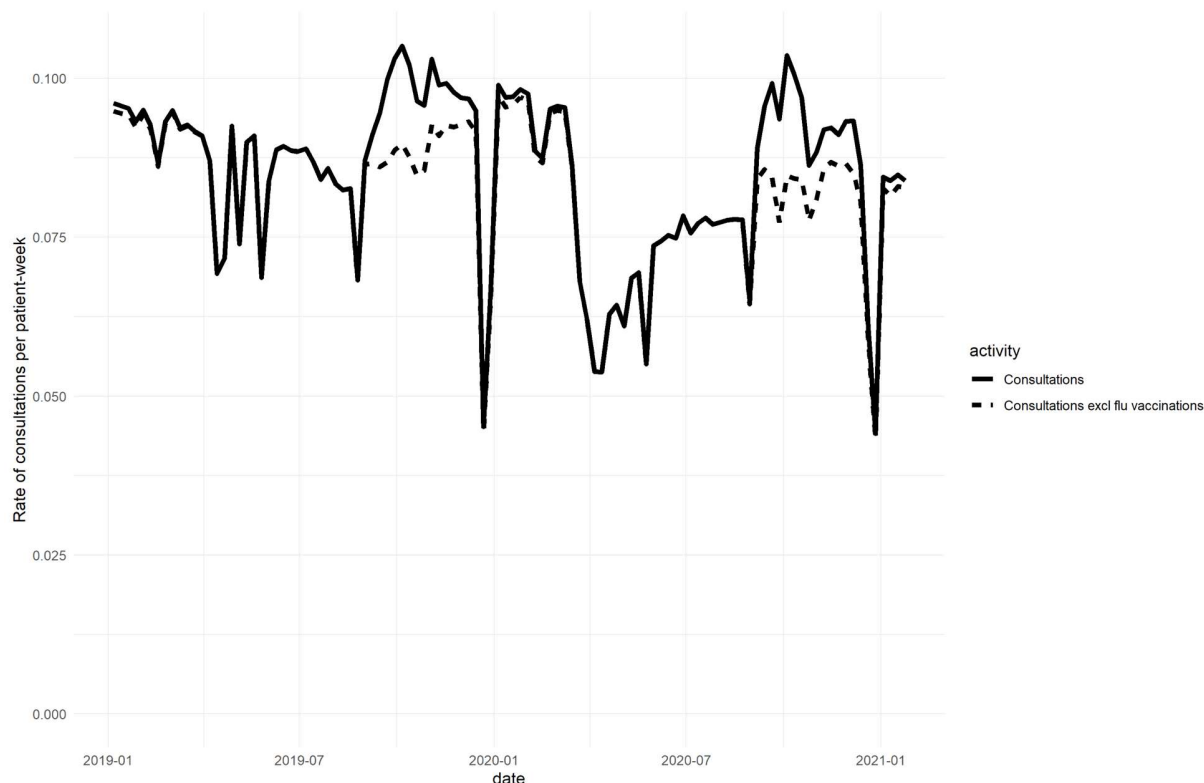

#### A list of terms excluded to help identify flu vaccinations in the data

We excluded observations in the data that the data provider identified as relating to vaccines. We then searched for the words flu and influenza in the medical term and excluded those that also contained the following words:

Letter, decline, consent, needs, request, missed, invite, needed, required, status, immunity, immune, advised, due, contact tracing, required, education, booked, up to date, did not attend, contraindicated, not indicated, invitation, history of, can be, indication, has flu vaccination at, reason for, other healthcare provider, given by pharmacist, recommend.

#### Annex 4: NHS targets for cancer wait times

|                                    |                                                                                                                                                                                                                                                                                                                                    | Operational standard |     |
|------------------------------------|------------------------------------------------------------------------------------------------------------------------------------------------------------------------------------------------------------------------------------------------------------------------------------------------------------------------------------|----------------------|-----|
| Maximum two weeks from             | Receipt of urgent referral for suspected cancer to first outpatient attendance                                                                                                                                                                                                                                                     | 93%                  |     |
|                                    | Receipt of referral of any patient with breast symptoms (where cancer not suspected) to first hospital assessment                                                                                                                                                                                                                  | 93%                  |     |
| Maximum 28 days from               | Receipt of two week wait referral for suspected cancer, receipt of urgent referral from a cancer screening programme (breast, bowel, cervical), and receipt of two week wait referral of any patient with breast symptoms (where cancer not suspected), to the date the patient is informed of a diagnosis or ruling out of cancer | 75%                  |     |
| Maximum one month (31 days) from:  | Decision to treat to first definitive treatment                                                                                                                                                                                                                                                                                    | 96%                  |     |
|                                    | Decision to treat/earliest clinically appropriate date to start of second or subsequent treatment(s) for all cancer patients including those diagnosed with a recurrence where the subsequent treatment is:                                                                                                                        | surgery              | 94% |
|                                    |                                                                                                                                                                                                                                                                                                                                    | drug treatment       | 98% |
|                                    |                                                                                                                                                                                                                                                                                                                                    | radiotherapy         | 94% |
| Maximum two months (62 days) from: | Urgent referral for suspected cancer to first treatment (62-day classic)                                                                                                                                                                                                                                                           | 85%                  |     |
|                                    | Urgent referral from a NHS Cancer Screening Programme (breast, cervical or bowel) for suspected cancer to first treatment                                                                                                                                                                                                          | 90%                  |     |



## Annex 5: Patient demographics and person-time and total numbers of observed activity in CPRD Aurum sample

Table A5.1: Patient demographics in CPRD Aurum sample as at 22 March 2020

|                  | Patient count as at 22 March 2020 |       |
|------------------|-----------------------------------|-------|
|                  | n                                 | %     |
| All              | 375,501                           |       |
| Female           | 187,509                           | 49.9% |
| Male             | 187,992                           | 50.1% |
| Under 11         | 39,611                            | 10.5% |
| 11 to 19         | 43,406                            | 11.6% |
| 20 to 49         | 157,962                           | 42.1% |
| 50 to 69         | 87,482                            | 23.3% |
| 70 and older     | 47,040                            | 12.5% |
| IMD Quintile - 1 | 78,759                            | 21.0% |
| IMD Quintile - 2 | 73,046                            | 19.5% |
| IMD Quintile - 3 | 71,840                            | 19.1% |
| IMD Quintile - 4 | 77,545                            | 20.7% |
| IMD Quintile - 5 | 74,020                            | 19.7% |
| IMD not recorded | 291                               | 0.1%  |

Table A5.2: Person time (weeks) and total primary care activity analysed - CPRD Aurum

|                                     | 3 January 2016 - 21 March 2020* |                       |                |                                         | 22 March 2020 - 29 January 2021 |                       |                |                                         |
|-------------------------------------|---------------------------------|-----------------------|----------------|-----------------------------------------|---------------------------------|-----------------------|----------------|-----------------------------------------|
|                                     | Patient-time (weeks)            | 100,000 person-months | Activity count | Observed rate per 100,000 person-months | Patient-time (weeks)            | 100,000 person-months | Activity count | Observed rate per 100,000 person-months |
| Consultations excl flu vaccinations | 78,868,977                      | 185.03                | 6,703,553      | 36,230                                  | 16,701,707                      | 38.07                 | 1,247,981      | 32,779                                  |
| Routine Referrals                   | 78,868,977                      | 185.03                | 312,422        | 1,688                                   | 16,701,707                      | 38.07                 | 40,744         | 1,070                                   |
| 2 Week Wait Referrals               | 78,868,977                      | 185.03                | 38,905         | 210.3                                   | 16,701,707                      | 38.07                 | 10,235         | 268.8                                   |

\*The pre-pandemic period consists of 220 weeks and 51.61 months, the post pandemic period is 45 weeks and 10.26 months

Annex 6: Observed vs expected appointment and cancer diagnosis counts from CWT data from 01 Jan 2019 (per person-month)

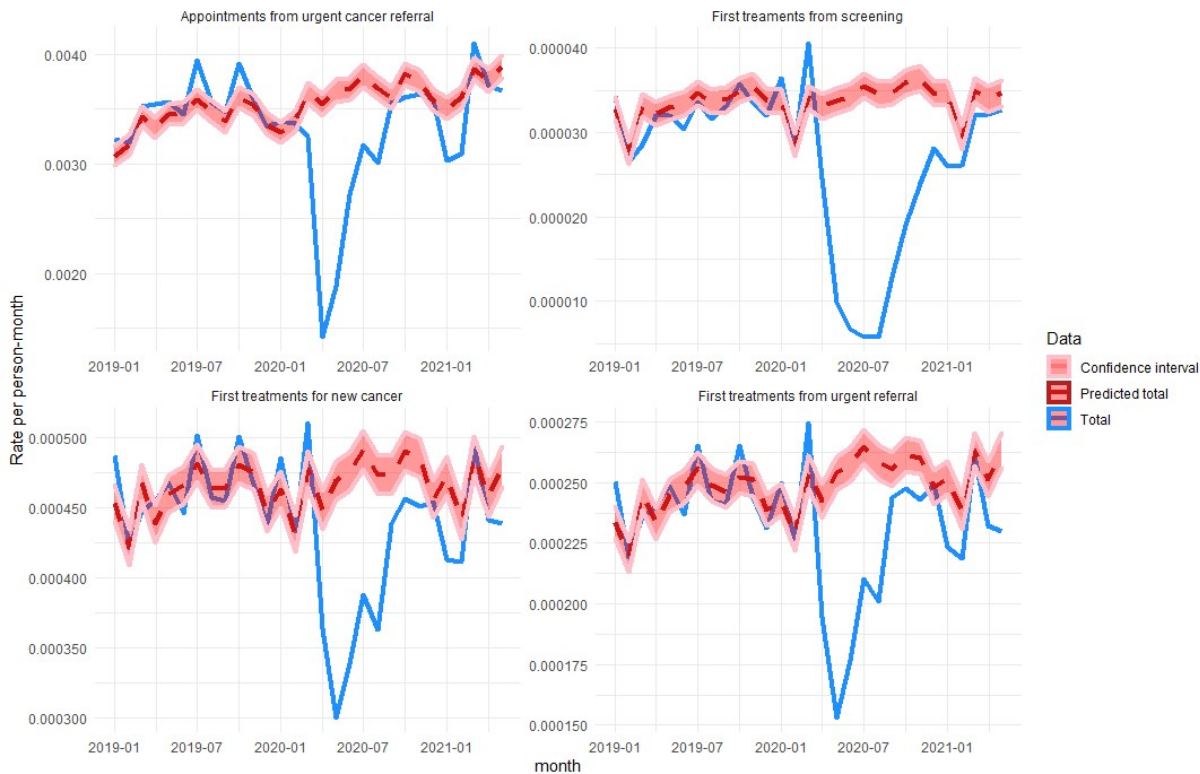

Annex 7: Comparing Cancer Wait Times counts for referrals and first treatments with the NCRAS data equity pack

CADEAS and NCRAS have produced two equity data packs presenting the latest national data on the number of urgent suspected two-week wait referrals and first definitive treatments for cancer. These data packs are produced on the basis of the Cancer Wait Times data, with analysis from Hospital Episode Statistics (HES) and other sources outlined in their technical notes.

“Any differences between treatment volumes in the published official statistics and the volumes presented in this pack are because:

- Data was extracted from the CWT system at a slightly different time.
- Data included here is based on England residents only.

Additional logic has been applied to remove treatments where some of the information required for this equity analysis is missing or there are potential data quality issues, for example cases with a mismatch between the suspected cancer referral type and sex (eg. gynaecological cancer treatments for men, testicular cancer treatments for women), and suspected cancer referral type and age (eg. suspected children's cancer for patients aged 20 and over).” – NCRAS Cancer data equity pack technical notes. Available: [http://www.ncin.org.uk/local\\_cancer\\_intelligence/cadeas](http://www.ncin.org.uk/local_cancer_intelligence/cadeas)

Table A7.1: Comparing Cancer Wait Times counts for referrals and first treatments with the NCRAS data equity pack

|                        |                | 01 Apr 2020 - 31 Jan 2021       |          |                            |                         |           |                            |
|------------------------|----------------|---------------------------------|----------|----------------------------|-------------------------|-----------|----------------------------|
|                        |                | First treatments for new cancer |          |                            | Urgent cancer referrals |           |                            |
|                        |                | Observed                        | Expected | Percentage change (95% CI) | Observed                | Expected  | Percentage change (95% CI) |
| Cancer wait times data |                |                                 |          |                            |                         |           |                            |
|                        | All            | 224,323                         | 267,946  | -16.3% (-16.6, -15.9)      | 1,673,775               | 2,071,967 | -19.2% (-19.3, -19.1)      |
| NCRAS data equity pack |                |                                 |          |                            |                         |           |                            |
|                        | All            | 219,410                         | 254,436  | -13.8% (-14.3, -13.3)      | 1,658,309               | 1,984,489 | -16.4% (-16.6, -16.3)      |
|                        | Breast         | 30,488                          | 40,530   | -24.8% (-25.9, -23.6)      | 337,582                 | 363,139   | -7% (-7.5, -6.6)           |
|                        | Gynaecological | 11,281                          | 12,344   | -8.6% (-10.9, -6.2)        | 158,723                 | 176,985   | -10.3% (-10.9, -9.7)       |
|                        | Head and Neck  | 8,892                           | 9,901    | -10.2% (-12.7, -7.6)       | 163,668                 | 189,837   | -13.8% (-14.4, -13.2)      |
|                        | Lower GI       | 23,507                          | 27,056   | -13.1% (-14.6, -11.6)      | 302,369                 | 366,677   | -17.5% (-17.9, -17.1)      |
|                        | Lung           | 24,796                          | 27,409   | -9.5% (-11.1, -8.0)        | 33,830                  | 53,641    | -36.9% (-37.8, -36.1)      |
|                        | Skin           | 40,977                          | 43,475   | -5.7% (-7.0, -4.5)         | 338,172                 | 429,802   | -21.3% (-21.7, -21.0)      |
|                        | Upper GI       | 17,059                          | 17,586   | -3% (-5.0, -0.9)           | 141,720                 | 163,013   | -13.1% (-13.7, -12.4)      |
|                        | Urological     | 37,970                          | 50,056   | -24.1% (-25.2, -23.1)      | 134,389                 | 184,642   | -27.2% (-27.7, -26.7)      |
|                        | All other      | 24,441                          | 26,080   | -6.3% (-7.9, -4.6)         | 47,856                  | 56,753    | -15.7% (-16.7, -14.6)      |

## Annex 8: Observed vs expected consultations by IMD quintile

Figure A8: Observed vs expected consultations per person per week by IMD quintile, age-standardised (01 Jan 2019 – 30 Jan 2021)

1  
2  
3  
4  
5  
6  
7  
8  
9  
10  
11  
12  
13  
14  
15  
16  
17  
18  
19  
20  
21  
22  
23  
24  
25  
26  
27  
28  
29  
30  
31  
32  
33  
34  
35  
36  
37  
38  
39  
40  
41  
42  
43  
44  
45  
46  
47  
48  
49  
50  
51  
52  
53  
54  
55  
56  
57  
58  
59  
60

Total and predicted Consultations excl flu vaccinations

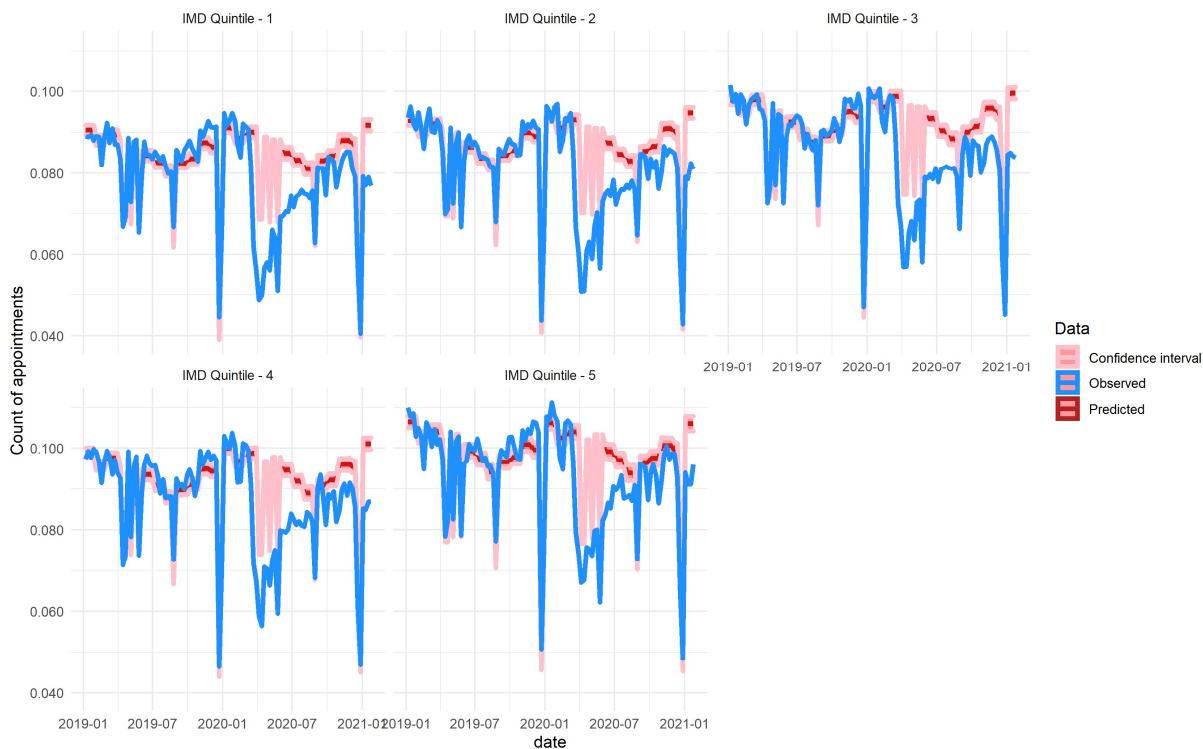

Peer review only

## STROBE Statement—checklist of items that should be included in reports of observational studies

|                              | Item No | Recommendation                                                                                                                                                                                                                                                                                                                                                                                                                                                         | Page No |
|------------------------------|---------|------------------------------------------------------------------------------------------------------------------------------------------------------------------------------------------------------------------------------------------------------------------------------------------------------------------------------------------------------------------------------------------------------------------------------------------------------------------------|---------|
| <b>Title and abstract</b>    | 1       | (a) Indicate the study's design with a commonly used term in the title or the abstract                                                                                                                                                                                                                                                                                                                                                                                 | 2       |
|                              |         | (b) Provide in the abstract an informative and balanced summary of what was done and what was found                                                                                                                                                                                                                                                                                                                                                                    | 2       |
| <b>Introduction</b>          |         |                                                                                                                                                                                                                                                                                                                                                                                                                                                                        |         |
| Background/rationale         | 2       | Explain the scientific background and rationale for the investigation being reported                                                                                                                                                                                                                                                                                                                                                                                   | 3       |
| Objectives                   | 3       | State specific objectives, including any prespecified hypotheses                                                                                                                                                                                                                                                                                                                                                                                                       | 3       |
| <b>Methods</b>               |         |                                                                                                                                                                                                                                                                                                                                                                                                                                                                        |         |
| Study design                 | 4       | Present key elements of study design early in the paper                                                                                                                                                                                                                                                                                                                                                                                                                | 4       |
| Setting                      | 5       | Describe the setting, locations, and relevant dates, including periods of recruitment, exposure, follow-up, and data collection                                                                                                                                                                                                                                                                                                                                        | 4       |
| Participants                 | 6       | (a) <i>Cohort study</i> —Give the eligibility criteria, and the sources and methods of selection of participants. Describe methods of follow-up<br><i>Case-control study</i> —Give the eligibility criteria, and the sources and methods of case ascertainment and control selection. Give the rationale for the choice of cases and controls<br><i>Cross-sectional study</i> —Give the eligibility criteria, and the sources and methods of selection of participants | 4       |
|                              |         | (b) <i>Cohort study</i> —For matched studies, give matching criteria and number of exposed and unexposed<br><i>Case-control study</i> —For matched studies, give matching criteria and the number of controls per case                                                                                                                                                                                                                                                 |         |
| Variables                    | 7       | Clearly define all outcomes, exposures, predictors, potential confounders, and effect modifiers. Give diagnostic criteria, if applicable                                                                                                                                                                                                                                                                                                                               | 4/5     |
| Data sources/<br>measurement | 8*      | For each variable of interest, give sources of data and details of methods of assessment (measurement). Describe comparability of assessment methods if there is more than one group                                                                                                                                                                                                                                                                                   | 4/5     |
| Bias                         | 9       | Describe any efforts to address potential sources of bias                                                                                                                                                                                                                                                                                                                                                                                                              | 5/6     |
| Study size                   | 10      | Explain how the study size was arrived at                                                                                                                                                                                                                                                                                                                                                                                                                              | 4       |
| Quantitative variables       | 11      | Explain how quantitative variables were handled in the analyses. If applicable, describe which groupings were chosen and why                                                                                                                                                                                                                                                                                                                                           | 4-6     |
| Statistical methods          | 12      | (a) Describe all statistical methods, including those used to control for confounding                                                                                                                                                                                                                                                                                                                                                                                  | 5/6     |
|                              |         | (b) Describe any methods used to examine subgroups and interactions                                                                                                                                                                                                                                                                                                                                                                                                    | 5/6     |
|                              |         | (c) Explain how missing data were addressed                                                                                                                                                                                                                                                                                                                                                                                                                            | 4-6     |
|                              |         | (d) <i>Cohort study</i> —If applicable, explain how loss to follow-up was addressed<br><i>Case-control study</i> —If applicable, explain how matching of cases and controls was addressed<br><i>Cross-sectional study</i> —If applicable, describe analytical methods taking account of sampling strategy                                                                                                                                                              | N/A     |
|                              |         | (e) Describe any sensitivity analyses                                                                                                                                                                                                                                                                                                                                                                                                                                  | 4-6     |

Continued on next page

| <b>Results</b>           |     |                                                                                                                                                                                                              |      |
|--------------------------|-----|--------------------------------------------------------------------------------------------------------------------------------------------------------------------------------------------------------------|------|
| Participants             | 13* | (a) Report numbers of individuals at each stage of study—eg numbers potentially eligible, examined for eligibility, confirmed eligible, included in the study, completing follow-up, and analysed            | 4/5  |
|                          |     | (b) Give reasons for non-participation at each stage                                                                                                                                                         | N/A  |
|                          |     | (c) Consider use of a flow diagram                                                                                                                                                                           | N/A  |
| Descriptive data         | 14* | (a) Give characteristics of study participants (eg demographic, clinical, social) and information on exposures and potential confounders                                                                     | 6-8  |
|                          |     | (b) Indicate number of participants with missing data for each variable of interest                                                                                                                          | 6-8  |
|                          |     | (c) <i>Cohort study</i> —Summarise follow-up time (eg, average and total amount)                                                                                                                             | N/A  |
| Outcome data             | 15* | <i>Cohort study</i> —Report numbers of outcome events or summary measures over time                                                                                                                          | 6/7  |
|                          |     | <i>Case-control study</i> —Report numbers in each exposure category, or summary measures of exposure                                                                                                         | N/A  |
|                          |     | <i>Cross-sectional study</i> —Report numbers of outcome events or summary measures                                                                                                                           | N/A  |
| Main results             | 16  | (a) Give unadjusted estimates and, if applicable, confounder-adjusted estimates and their precision (eg, 95% confidence interval). Make clear which confounders were adjusted for and why they were included | 6-8  |
|                          |     | (b) Report category boundaries when continuous variables were categorized                                                                                                                                    | N/A  |
|                          |     | (c) If relevant, consider translating estimates of relative risk into absolute risk for a meaningful time period                                                                                             | N/A  |
| Other analyses           | 17  | Report other analyses done—eg analyses of subgroups and interactions, and sensitivity analyses                                                                                                               | 6-8  |
| <b>Discussion</b>        |     |                                                                                                                                                                                                              |      |
| Key results              | 18  | Summarise key results with reference to study objectives                                                                                                                                                     | 9    |
| Limitations              | 19  | Discuss limitations of the study, taking into account sources of potential bias or imprecision. Discuss both direction and magnitude of any potential bias                                                   | 9/10 |
| Interpretation           | 20  | Give a cautious overall interpretation of results considering objectives, limitations, multiplicity of analyses, results from similar studies, and other relevant evidence                                   | 10   |
| Generalisability         | 21  | Discuss the generalisability (external validity) of the study results                                                                                                                                        | 9/10 |
| <b>Other information</b> |     |                                                                                                                                                                                                              |      |
| Funding                  | 22  | Give the source of funding and the role of the funders for the present study and, if applicable, for the original study on which the present article is based                                                | 1    |

\*Give information separately for cases and controls in case-control studies and, if applicable, for exposed and unexposed groups in cohort and cross-sectional studies.

**Note:** An Explanation and Elaboration article discusses each checklist item and gives methodological background and published examples of transparent reporting. The STROBE checklist is best used in conjunction with this article (freely available on the Web sites of PLoS Medicine at <http://www.plosmedicine.org/>, Annals of Internal Medicine at <http://www.annals.org/>, and Epidemiology at <http://www.epidem.com/>). Information on the STROBE Initiative is available at [www.strobe-statement.org](http://www.strobe-statement.org).

# BMJ Open

## Primary Care and Cancer: an analysis of the impact and inequalities of the COVID-19 pandemic on patient pathways

|                                 |                                                                                                                                                                                                                                     |
|---------------------------------|-------------------------------------------------------------------------------------------------------------------------------------------------------------------------------------------------------------------------------------|
| Journal:                        | <i>BMJ Open</i>                                                                                                                                                                                                                     |
| Manuscript ID                   | bmjopen-2021-059374.R1                                                                                                                                                                                                              |
| Article Type:                   | Original research                                                                                                                                                                                                                   |
| Date Submitted by the Author:   | 26-Jan-2022                                                                                                                                                                                                                         |
| Complete List of Authors:       | Watt, Toby; The Health Foundation, REAL Centre<br>Sullivan, Richard; King's College London<br>Aggarwal, Ajay; London School of Hygiene and Tropical Medicine Faculty of Public Health and Policy, Health Services Research & Policy |
| <b>Primary Subject Heading</b>: | Oncology                                                                                                                                                                                                                            |
| Secondary Subject Heading:      | General practice / Family practice                                                                                                                                                                                                  |
| Keywords:                       | ONCOLOGY, PRIMARY CARE, COVID-19                                                                                                                                                                                                    |
|                                 |                                                                                                                                                                                                                                     |

SCHOLARONE™  
Manuscripts

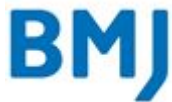

I, the Submitting Author has the right to grant and does grant on behalf of all authors of the Work (as defined in the below author licence), an exclusive licence and/or a non-exclusive licence for contributions from authors who are: i) UK Crown employees; ii) where BMJ has agreed a CC-BY licence shall apply, and/or iii) in accordance with the terms applicable for US Federal Government officers or employees acting as part of their official duties; on a worldwide, perpetual, irrevocable, royalty-free basis to BMJ Publishing Group Ltd ("BMJ") its licensees and where the relevant Journal is co-owned by BMJ to the co-owners of the Journal, to publish the Work in this journal and any other BMJ products and to exploit all rights, as set out in our [licence](#).

The Submitting Author accepts and understands that any supply made under these terms is made by BMJ to the Submitting Author unless you are acting as an employee on behalf of your employer or a postgraduate student of an affiliated institution which is paying any applicable article publishing charge ("APC") for Open Access articles. Where the Submitting Author wishes to make the Work available on an Open Access basis (and intends to pay the relevant APC), the terms of reuse of such Open Access shall be governed by a Creative Commons licence – details of these licences and which [Creative Commons](#) licence will apply to this Work are set out in our licence referred to above.

Other than as permitted in any relevant BMJ Author's Self Archiving Policies, I confirm this Work has not been accepted for publication elsewhere, is not being considered for publication elsewhere and does not duplicate material already published. I confirm all authors consent to publication of this Work and authorise the granting of this licence.



## Primary Care and Cancer: an analysis of the impact and inequalities of the COVID-19 pandemic on patient pathways

Authors: Toby Watt<sup>1,2</sup>, Richard Sullivan<sup>3</sup> and Ajay Aggarwal<sup>4</sup>

1. The Health Foundation, 8 Salisbury Sq., London, UK,

2. Department of Public Health, Environments and Society, London School of Hygiene and Tropical Medicine, 15-17 Tavistock Place, London, UK

3. School of Cancer and Pharmaceutical Sciences, King's College London, London, UK; Institute of Cancer Policy, King's College London, London, UK; Department of

Oncology, Guy's and St Thomas' NHS Foundation Trust, London, UK.

4. Department of Health Services Research and Policy, London School of Hygiene & Tropical Medicine, London, UK; Institute of Cancer Policy, King's College London,

London, UK; Department of Oncology, Guy's and St Thomas' NHS Foundation Trust, London, UK.

Corresponding author: Toby Watt, [toby.watt@health.org.uk](mailto:toby.watt@health.org.uk)

Word count: 4,584

## Abstract

### Objectives

We explore the routes to cancer diagnosis to further understanding of the inequality in the reduction in detection of new cancers since the start of the pandemic. We use different data sets to assess stages in the cancer pathway: primary care data for primary care consultations, routine and urgent referrals and published analysis of cancer registry data for appointments and first treatments.

### Setting

Primary and cancer care

### Participants

In this study we combine multiple data sets to perform a population-based cohort study on different areas of the cancer pathway. For primary care analysis, we use a random sample of 500,000 patients from the Clinical Practice Research Datalink (CPRD). Post-referral we perform a secondary data analysis on the Cancer Wait Times data and the National Cancer Registry Analysis Service (NCRAS) COVID-19 data equity pack.

### Outcome measures:

Primary care: consultation, urgent cancer referral and routine referral rates, then appointments following an urgent cancer referral, and first treatments for new cancer, for all and by quintile of patient's local area Index of Multiple Deprivation.

### Results

Primary care contacts and urgent cancer referrals fell by 12.4% (12.3 to 12.6; 95% CI) and 20.2% (18.1 to 22.3; 95% CI) respectively, while routine referrals have not recovered to pre-pandemic levels. Reductions in first treatments for newly diagnosed cancers are down 16.3% (15.9 to 16.6; 95% CI). The reduction in the number of two week wait referrals and first treatments for all cancer has been largest for those living in poorer areas, despite having a smaller reduction in primary care contact.

### Conclusions

Our results further evidence the strain on primary care and the presence of the inverse care law, and the dire need to address the inequalities so sharply brought into focus by the pandemic. We need to address the disconnect between the importance we place on the role of primary care and the resources we devote to it.

**Key Words:** Oncology, Primary Care, COVID-19

### Strengths and Limitations

- This study draws from multiple data sets along the complex, multidisciplinary cancer pathway.
- We use a rich primary care data set containing patient level primary care activity linked to patients' local area socioeconomic indicator.
- Our primary care patient sample is relatively small (500,000 active patients from January 2016 to January 2021), however the data produces results that closely mirror the rates of consultation and urgent cancer referral per patient produced in publicly available national data sets.

## INTRODUCTION

The COVID-19 pandemic has had a profound impact on UK's health system. Each part of the UK's National Health Service has been impacted in different ways, and we are still feeling many of the consequences of both the COVID-19 pandemic and the public health measures put in place to manage it (non-pharmaceutical interventions; NPI). Cancer is one of the most complicated diseases that the UK health system must manage, being responsible for over one in four UK deaths in 2019. Cancer outcomes are acutely sensitive to changes in social determinants, patient pathways and service provision. Delays in both diagnosis and treatment have significant impacts on patient outcomes(1,2). Pandemic related diagnostic delays, lack of capacity and downstream stage progression (to more advanced disease) are already being seen(3). In addition, the impact of the pandemic needs to be seen in the context of an already overstretched UK cancer care system pre-pandemic that was 'burning hot' even in normal times(4).

Primary care sits at the heart of the cancer patient pathway and is the most crucial interface for early diagnosis and referral to hospital-based care, in addition to their wider support of cancer patient undergoing and post treatment. As models of cancer care have evolved in light of both technical advances and an ageing co-morbid population primary care has become an increasingly important aspect of integrated cancer care and an expansion of General Practitioner (GP) roles in cancer care(5). On average 22.5% of patients diagnosed with cancer are referred to oncology diagnostic services from primary care, but this reflects wide site-specific variation from as little as 8.3% of breast cancer to 42% for bladder cancer(6).

It is important to reflect that prior to the start of the COVID-19 pandemic primary care had seen significant declines in overall resourcing relative to the funding of the rest of the NHS and compared to growing levels of disease burden that is managed in primary care. In addition, there is growing evidence that primary care has been under greater pressure in more deprived areas, with higher levels of staff turnover(7), higher levels of complex multimorbidity(8), higher numbers of consultations(9) and lower levels of funding and fewer GPs per capita once levels of ill health are taken into account(10). These pressures on primary care, and a desire to correct them, have been recognised in the NHS Long Term Plan(11).

Thus, to understand the COVID-19's impact on primary care and the downstream impact on cancer outcomes we need to see that the pandemic arrived when the system that was already struggling to cope. Prior to COVID-19, the central role of primary care as agents of change in reducing inequalities had been the subject of much debate yet could do little in the face of political avoidance of health equity(12). Primary care had become a mirror on inequalities but also subject to significant pressures from these growing inequalities that had put practices in deprived populations under significant stress. Yet despite this, equity-oriented primary care reform in England in the mid-to-late 2000s may have helped to reduce socioeconomic inequality in health(13).

[Box]

COVID-19 was officially declared a pandemic by the WHO on 11 March 2020, and the UK announced its first full lockdown on 23<sup>rd</sup> March. In the following months UK NPI were eased, schools reopened in phases, non-essential shops reopened and in August the population were encouraged to eat out. Some restrictions were re-imposed in September and October, on the 5<sup>th</sup> of November 2020 a second brief national lockdown lasted until 2<sup>nd</sup> December. On the 6<sup>th</sup> of January a third national lockdown was introduced(14).

[End box]

It is now clear that the UK experience of the pandemic was one of the worst in the world, both in terms of excess mortality (both COVID-19 and non-COVID-19) and the impact of NPI (lockdowns) on both the ability of health services to continue provide care and the impact of messaging (stay at home) on patients' timely presentation for care(15). However, the overwhelming focus of impact studies on cancer care has been on hospital-based services, including diagnostics. Given primary care's central role in pathways to diagnosis and integrated cancer care, including survivorship there has been little insight around how overall changes in consultation rates impacted both routine and two week wait referrals as well as how this varied both in terms of site-specific cancers and as a consequence of socio-economic

inequalities. This study aimed to analyse the socioeconomic inequalities in the impact of NPI measures taken in response to COVID-19 on consultations and routine and urgent cancer referrals in primary care and cancer diagnosis in secondary care.

## METHODS

### Study design, data sources and participants

We perform a population-based cohort study using the following three separate sources.

#### *Primary care data – CPRD Aurum*

Primary care electronic health records were obtained from the Clinical Practice Research Datalink Aurum database (henceforth CPRD). We included patient records from 01 January 2016 to 31 January 2021. Pre-pandemic data were included to establish long-term trends and patterns of seasonality in primary care use and referrals to secondary care. Similar to recent analysis of the COVID-19 pandemic(16), our analysis focusses on comparing observed levels of activity to the expected following the introduction of NPI in England in March 2020.

CPRD contains anonymised patient primary care data from approximately 7% of the UK population and is broadly representative in terms of age, sex, and ethnicity(17). The patient records include information on consultations, patient demographic information, diagnoses, medication prescriptions, and referrals to secondary care.

The period of eligibility for study inclusion, which starts on the latest of the study start date (01/01/2016) or the patient's registration to their practice. A patient's period of eligibility ends on the earliest of leaving their practice, the end of data collection from their practice or their death. Primary care records from CPRD were linked to the deciled index of multiple deprivation (IMD) from 2015<sup>i</sup>(18) of each patient's lower layer super output area (LSOA<sup>ii</sup>). 500,000 patients were randomly sampled from the CPRD population in England who were eligible for linkage within the defined study period.

#### *Cancer wait times data*

Cancer waiting times (CWT) measure performance against the NHS Constitution Standards, recording the number of patients screened, referred to oncology specialists, diagnosed and treated for cancer. These measures are used by local and national organisations to monitor the timely delivery of services to patients, they are published quarterly by NHS Digital<sup>iii</sup>.

#### *Cancer diagnosis by socioeconomic status - NCRAS Cancer equity data*

Data on cancer diagnosis by socioeconomic group was drawn from CADEAS and National Cancer Registry Analysis Service (NCRAS) which have two published data sets(19), presenting the latest national data on:

- i. The number of urgent suspected two-week wait referrals<sup>iv</sup> and,
- ii. First definitive treatments for cancer<sup>v</sup>.

<sup>i</sup> <https://www.gov.uk/government/statistics/english-indices-of-deprivation-2015>

<sup>ii</sup> Geographic areas in England and Wales that are built from groups of contiguous Output Areas and have been automatically generated to be as consistent in population size as possible, and typically contain from four to six Output Areas. The Minimum population is 1000 and the mean is 1500. For more details visit:

[https://datadictionary.nhs.uk/nhs\\_business\\_definitions/lower\\_layer\\_super\\_output\\_area.html#:~:text=Lower%20Layer%20Super%20Output%20Areas,statistics%20in%20England%20and%20Wales.](https://datadictionary.nhs.uk/nhs_business_definitions/lower_layer_super_output_area.html#:~:text=Lower%20Layer%20Super%20Output%20Areas,statistics%20in%20England%20and%20Wales.)

<sup>iii</sup> <https://www.england.nhs.uk/statistics/statistical-work-areas/cancer-waiting-times/>

<sup>iv</sup> <http://www.ncin.org.uk/view?rid=4346> (accessed on 24 January 2022)

<sup>v</sup> <http://www.ncin.org.uk/view?rid=4347> (accessed on 24 January 2022)

1 These data packs are produced based on the CWT data, with analysis from Hospital Episode Statistics (HES) and other  
2 sources outlined in their technical notes (further details in Annex 1).

### 3 **Study Outcomes**

#### 4 Primary care consultations

5 We define consultations in CPRD data by a set of rules developed based on two variables in the consultations file<sup>vi</sup>  
6 (“EMIS® consultation source identifier” and “Consultation source code identifier”)<sup>vii</sup>. In line with the approach taken by  
7 Carey et al 2012 for CPRD Gold data, we use a combination of the consultation code and the category of the record to  
8 identify consultations (details in Annex 2).

9 Using the observation file in CPRD Aurum, we were also able to identify where patients had influenza vaccinations. We  
10 look to exclude flu vaccines from our analysis on the basis that the programme was expanded in 2020/21 to achieve  
11 maximum uptake<sup>viii</sup>. To help with the comparability of consultations in the two periods, we removed primary care  
12 appointments that included a flu vaccine.

#### 13 Referrals from primary care: routine and urgent cancer

14 Referrals in CPRD are categorized into routine and “urgent cancer”. Referrals from the ‘referral file’ are linked to  
15 patients, no additional data cleaning steps were taken in the analysis of referrals.

#### 16 First appointment following an urgent referral

17 The CWT data present monthly counts of patients in England who have been recorded as receiving a first appointment  
18 following an urgent referral from primary care. The CWT data record this because the NHS have a 2-week performance  
19 target (Annex 3).

20 The NCRAS cancer equity data contain monthly counts in England of appointments following an urgent cancer referral  
21 broken down by tumour type and by deprivation according to patient’s place of residence.

#### 22 First treatment following a cancer diagnosis

23 The CWT data present monthly counts of patients in England who have been recorded as receiving a first treatment for a  
24 new cancer diagnosis. The CWT data record this because the NHS have a 31-day performance target (Annex 3).

25 The NCRAS cancer equity data contain monthly counts in England of first treatments for new cancer broken down by  
26 tumour type and by deprivation according to patient’s place of residence.

### 27 **Patient and public involvement**

28 No patients involved

### 29 **Data analysis**

#### 30 CPRD & CWT

31 For both CPRD and CWT we separate the data into two, before and after the introduction of the first NPI.

32  
33  
34  
35  
36  
37  
38  
39  
40  
41  
42  
43  
44  
45  
46  
47  
48  
49  
50  
51  
52  
53  
54  
55 <sup>vi</sup> <https://cprd.com/primary-care>

56 <sup>vii</sup> These variables contain strings that categorise the patient record input and are selected by the staff member completing the  
57 record.

58 <sup>viii</sup> [https://www.england.nhs.uk/wp-content/uploads/2020/05/Letter\\_AnnualFlu\\_2020-21\\_20200805.pdf](https://www.england.nhs.uk/wp-content/uploads/2020/05/Letter_AnnualFlu_2020-21_20200805.pdf)

1 Our analysis of CPRD primary care is conducted weekly and split into two periods before and after the introduction of  
2 NPI on March 23<sup>rd</sup> 2020 (pre-NPI data is from 03 January 2016 to 21 March 2020, our post-NPI onset data is 22 March  
3 2020 to 30 January 2021).

4 CWT data is reported monthly, our pre-NPI data is therefore from 01 October 2009 to 31 March 2020, our post-NPI  
5 onset period is 01 April 2020 to 31 January 2021.

6 We perform a linear regression of consultations, urgent and routine referrals from CPRD data and appointments  
7 following an urgent cancer referral and first treatments from CWT data over time to estimate expected values for the  
8 post-NPI onset period, based on predicted values from the data pre-NPI. To account for seasonality and time trends we  
9 include months as a categorical variable and time as a continuous variable, the approach taken by Carr et al.(16). In the  
10 case of weekly primary care data, we observe large dips in activity in weeks that include bank holidays and include a  
11 categorical variable on the basis of the number of bank holidays in each week (in the winter holidays in England there is  
12 always one week with two bank holidays). Our primary care activity rates are presented per 100,000 patient-months<sup>ix</sup>.  
13 When analysing primary care consultation rates by socioeconomics we adjust for population age. We do so when  
14 calculating the consultation rates by IMD quintile and weighting the sample according to the European Standard  
15 Population<sup>x</sup> (ESP).  
16  
17  
18  
19

#### 20 *NCRAS equity data*

21  
22 The analysis presented in the equity data pack compares new instances of first treatments in months during the  
23 pandemic (01 April 2020 – 31 Jan 2021) compared with the same months in 2019/20. The analysis includes a 95%  
24 confidence interval for the changes, based on rate ratios under an assumption that the population is the same in the  
25 pre-COVID-19 baseline and COVID-19 months. This is calculated using the exact method described in Breslow & Day  
26 1987, pp 93-95(20). The NCRAS equity data pack shows the high levels of heterogeneity in the impact of the COVID-19  
27 pandemic on different tumour locations. The NCRAS data equity pack is different in its count and analysis of “all  
28 tumours” compared with the Cancer Wait Times Data, this is because the data are slightly different (cleaned and  
29 analysed by NCRAS – details in Annex 1). Results of our analysis with each data set are compared in Annex 4. Our  
30 presentation of these data follows the same method but presents the cumulative difference for the period from April  
31 2020 to the end of January compared with the previous 12 months.  
32  
33  
34

## 35 **RESULTS**

### 36 **Overall impact of the pandemic**

37  
38 In the calendar year of 2019, before the COVID-19 pandemic and the associated NPI, there was an average of 39,127  
39 primary care consultations per 100,000 patient-months. This equates to 4.70 attended appointments per registered  
40 patient, or an estimated 266 million appointments in primary care nationally in 2019<sup>xi</sup>.  
41  
42

43 Primary care consultations (Figure 1 a) dropped rapidly to a low of 26,919 consultations per 100,000 patient-months in  
44 the week following 29 March 2020, this was 66.0% lower than the predicted rate. Rates slowly recovered over the next  
45 24 weeks and by 05 September 2020 were up to 99% of the baseline. In total there were an estimated 19.7 million (19.5  
46 to 20.0; 95% CI) fewer primary care consultations in the English NHS during this period. Primary care  
47 consultations again fell to below 90% of predicted levels in the third wave NPI starting on 06 January 2021, by the end of  
48 January 2021 there were a further 6.4 million fewer consultations than expected. Between the start of the first NPI in  
49  
50  
51  
52

---

53  
54 <sup>ix</sup> We adjust the weekly rates per active patient in our sample to 100,000 patient-months: Weekly rate per registered patient in  
55 sample x 100,000 x (52/12)

56 <sup>x</sup> <https://www.causesofdeath.org/docs/standard.pdf>

57 <sup>xi</sup> For comparison the NHS national appointments data recorded 272 million attended appointments in primary care in 2019. Found  
58 here: <https://digital.nhs.uk/data-and-information/publications/statistical/appointments-in-general-practice/march-2021>



March 2020 and the end of January 2021 there were an estimated 26.1 million (25.7 to 26.5; 95% CI) fewer appointments than expected (Table 1a).

In 2019, the average rate of urgent cancer (two week wait) referral was 314 per 100,000 patient-months, equating to an estimated 2.12 million for the NHS in England. Following the first NPI, urgent cancer referrals from primary care (Figure 1 b) fell to a nadir of 86 per 100,000 patient-months by 29 March 2020 (29.7% of the predicted level). Urgent cancer referrals did not return to pre-pandemic baseline until the week following 23 August 2020 equating to 317,000 (280,000 to 356,000; 95% CI) estimated lost urgent cancer referrals over this period. There was a second fall in urgent cancer referrals from primary care in the winter to below 90% of the baseline following the third lockdown (164 referrals per 100,000 patient-months in the week beginning 27 December 2021). This resulted in a further estimated 91,705 fewer urgent cancer referrals than expected. Between the start of the first NPI in March 2020 and the end of January 2021 there were 395,000 (344,000 to 446,000; 95% CI) fewer urgent cancer referrals than expected (Table 1a).

Routine referrals however have shown a different trajectory in that their rates did not recover to pre-pandemic levels (Figure 1 c). As a share of predicted levels routine referrals had the greatest fall, dropping to 16.1% of predicted rates in the week from 19 April 2020. From then to the end of January the closest it came to predicted levels was 80.3% in the week flowing 13 September 2020. For the four weeks in January 2021, it had fallen back down to 60-70% of predicted rates. In 2019 there were an average of 1,801 routine referrals per 100,000 patient-months from primary care, equivalent to an estimated 12.2 million for the NHS in England. Between the start of the first NPI in March 2020 and the end of January 2021 there were 4.33 million (4.21 to 4.46; 95% CI) fewer routine referrals than expected (Table 1a).

Patient demographics and patient-time and total numbers of observed consultations and routine and urgent referrals in our CPRD sample are presented in Annex 5.

*Table 1a: Observed post COVID-19 primary care activity (CPRD Aurum) 22 March 2020 – 30 January 2021*

|                                       | Observed rate | Expected rate | Percentage reduction (95% CI) | Estimated # missing from England population, to 3 significant digits (95% CI) |
|---------------------------------------|---------------|---------------|-------------------------------|-------------------------------------------------------------------------------|
| Event rate per 100,000 patient-months |               |               |                               |                                                                               |
| Consultations                         | 34,201        | 38,684        | 11.6% (11.4, 11.7)            | 26,100,000<br>(25,700,000, 26,500,000)                                        |
| Routine Referrals                     | 1,067         | 1,812         | 41.1% (40.4, 41.8)            | 4,330,000<br>(4,210,000, 4,460,000)                                           |
| 2 Week Wait Referrals                 | 268           | 336           | 20.2% (18.1, 22.3)            | 395,000<br>(344,000, 446,000)                                                 |

*Table 1b: Observed post COVID-19 cancer diagnostic activity (Cancer Wait Times), 01 April 2020 - 31 January 2021*

|                                                                               | Observed rate | Expected rate | Percentage reduction (95% CI) | Estimated # missing from England population, to 3 significant digits (95% CI) |
|-------------------------------------------------------------------------------|---------------|---------------|-------------------------------|-------------------------------------------------------------------------------|
| Event rate per 100,000 patient-months                                         |               |               |                               |                                                                               |
| First consultant appointments following urgent referral from primary care     | 296           | 366           | 19.2% (19.1, 19.3)            | 398,000<br>(395,000, 401,000)                                                 |
| Incidence rate per 100,000 patient-months                                     |               |               |                               |                                                                               |
| First treatments for new cancer from the urgent primary care referral pathway | 21.4          | 25.5          | 16.1% (15.5, 16.8)            | 23,300<br>(22,200, 24,400)                                                    |
| First treatments for new cancer from the national screening pathway           | 1.63          | 3.47          | 53.2% (52, 54.3)              | 10,400<br>(10,000, 10,900)                                                    |
| First treatments for new cancer                                               | 39.7          | 47.4          | 16.3% (15.9, 16.6)            | 43,600<br>(42,500, 44,700)                                                    |

Table 1a summarises the missing appointments and referrals for the post-pandemic period. Since the start of the pandemic in March we have observed consultations rates that are 11.6% (11.4 to 11.7; 95% CI) lower than predicted by previous data. The number of referrals to secondary care per consultation has also fallen, with urgent cancer referrals 20.2% (18.1 to 22.3; 95% CI) and routine referrals 41.1% (40.4 to 41.8; 95% CI) lower than expected.

The knock-on effect of the reductions in patients' primary care appointments and referrals can be observed in the national CWT data. The number of first appointments with a cancer specialist following an urgent cancer referral has fallen by approximately the same amount as estimated for the referrals themselves: 19.2% (19.1 to 19.3; 95% CI). The number of cancer first treatments (following a diagnosis and decision to treat) was 16.3% (15.9 to 16.6; 95% CI) lower than expected, or 43,600 (42,500 to 44,700; 95% CI) missing first treatments from 01 April 2020 - 31 January 2021<sup>xii</sup> (graphs of observed compared with expected are presented in Annex 6).

Urgent cancer referrals by site specific cancer from 01 April 2020 until 31 January 2021 showed significant heterogeneity from moderate reductions in urgent referrals for suspected breast (7.0%; 95% CI 6.6 to 7.5) and gynaecological cancers (10.3%; 95% CI 9.7 to 10.9) and greater reductions for lung (36.9%; 95% CI 36.1 to 37.8) and urological (27.2%; 95% CI 26.7 to 27.7) cancers (Figure 2, further details in Annex 4, Table A4.1). To show how pathway delays interface with reductions in cancer referrals we also examined reductions in first treatments for the same site-specific cancers over this period (Figure 2). Breast and urological cancers observed the greatest reduction in new first treatments: Breast fell by 24.8% (23.6 to 25.9; 95% CI) which equates to 10,000 missing treatments and urological by 24.1% (23.2 to 25.2; 95% CI) which equates to 12,100 missing treatments. Taken together these data reflect substantial delays in both diagnostic and treatment phases of the patient pathway.

### Inequalities in cancer diagnosis outcomes in the pandemic

There are inequalities in primary care use in England, with the people who live in the poorest areas have higher rates of consultation than those in richer areas once we adjust for age. The most deprived quintile was expected to have 43,184 consultations per 100,000 patient-months (Table 2), 15% more than the least deprived.

*Table 2: Observed post COVID-19 primary care activity (CPRD Aurum) by IMD quintile, actual and age-standardised*

|                                                              | 22 Mar 2020 - 30 Jan 2021 (Weekly) |               |                               |
|--------------------------------------------------------------|------------------------------------|---------------|-------------------------------|
|                                                              | Observed rate                      | Expected rate | Percentage reduction (95% CI) |
| Consultations per 100,000 patient-months                     |                                    |               |                               |
| IMD Quintile - 1 (least deprived)                            | 33,813                             | 38,601        | 12.4% (12.1, 12.7)            |
| IMD Quintile - 2                                             | 34,169                             | 38,793        | 11.9% (11.6, 12.3)            |
| IMD Quintile - 3                                             | 35,069                             | 40,127        | 12.6% (12.3, 12.9)            |
| IMD Quintile - 4                                             | 33,494                             | 37,793        | 11.4% (11, 11.7)              |
| IMD Quintile - 5 (most deprived)                             | 34,561                             | 38,212        | 9.6% (9.2, 9.9)               |
| Consultations per 100,000 patient-months (Age-standardised*) |                                    |               |                               |
| IMD Quintile - 1 (least deprived)                            | 32,927                             | 37,636        | 12.5% (12.2, 12.8)            |
| IMD Quintile - 2                                             | 33,916                             | 38,647        | 12.2% (11.9, 12.6)            |
| IMD Quintile - 3                                             | 35,535                             | 40,870        | 13.1% (12.7, 13.4)            |
| IMD Quintile - 4                                             | 36,271                             | 41,148        | 11.9% (11.5, 12.2)            |
| IMD Quintile - 5 (most deprived)                             | 38,997                             | 43,184        | 9.7% (9.4, 10)                |

\*Age-standardisation is performed according to the European Standard Population (ESP)

The reduction of consultations over the period 22 March 2020-30 January 2021 was smallest for those in most deprived areas. Their reduction in consultations for the non-age-standardised figures was 9.6% (9.2 to 9.9), while for the least

<sup>xii</sup> Dates for the CWT and NCRAS analysis do not line up with the CPRD analysis because the latter is conducted weekly, not monthly.



1 deprived the reduction was 12.4% (13.2 to 13.9; 95% CI) (Table 2). Weekly levels of age-standardised consultations per  
2 100,000 patient-months by IMD quintile are presented in Annex 7.

3 Despite a smaller reduction in primary care contacts, we observe the largest reduction in both urgent cancer referrals  
4 and first treatments for cancer for patients living in the most deprived areas. The NCRAS data equity pack presents the  
5 number of urgent cancer referrals and first cancer treatments by IMD quintile<sup>xiii</sup>. Figure 3 shows the reduction in urgent  
6 cancer referrals and first treatments for newly diagnosed cancer by IMD quintile.

7  
8  
9 There was a greater percentage reduction in urgent cancer referrals for those living in the most deprived areas in  
10 England, who experienced a 17.6% (17.2 to 18.0; 95% CI) reduction between 01 April 2020 and 31 January 2021  
11 compared with the same period 12 months before, while referrals for the least deprived quintile fell by proportionately  
12 less: 15.3% (14.9 to 15.6; 95% CI). This equates to a reduction of 61,500 referrals for the most deprived and 62,600 or  
13 the least: without adjusting for age, the most deprived quintile had a smaller proportion of the pre-pandemic urgent  
14 cancer referrals, with 350,000 referrals compared to 410,000 for the least deprived quintile from April 2019 to January  
15 2020.

16  
17  
18 At the same time, rates of new treatment for cancer for the people living in the most deprived 20% of England  
19 experienced a 15.8% (14.6 to 17.0; 95% CI) reduction between 01 April 2020 and 31 January 2021 compared with the  
20 same period 12 months before (6,610 missing first treatments). The reduction for the least deprived was 12.6% (11.5 to  
21 13.7; 95% CI) which equates to 6,880 missing first treatments.

22  
23 Despite having more access to primary care for patients in more deprived areas (9.7% reduction for most deprived  
24 compared to 12.5% for the least deprived), urgent cancer referrals and newly diagnosed cancers have been disrupted by  
25 the pandemic more for people living in poorer areas.

## 26 27 28 **DISCUSSION**

29  
30 The coronavirus SARS-CoV-2 (COVID-19) pandemic has had a profound impact on the management of patients with  
31 cancer(21). The first national lockdown in March 2020 created a ripple of non-pharmaceutical interventions, including  
32 'stay at home' orders, diminished healthcare service provision and redistribution of healthcare to COVID-19 related care  
33 that has had a profound impact on cancer services(1,22).

34  
35 There are also new potential barriers to the pathway that have resulted and may exacerbate these findings. For  
36 example, decreases in health seeking behaviour due to fear of acquiring covid-19 infection through interactions with  
37 health care settings, increasing use of remote consultations(23), changes in routine referral guidelines(24), as well as  
38 changes in the capacity of acute care. The backlog for routine diagnostic services is a particular concern given that  
39 approximately 40% of cancer are diagnosed through this route(25).

40  
41  
42 Similar issues have also been identified within other high-income country health systems. Primary care providers in eight  
43 European countries experienced similar issues in how to rapidly transform services in the wake to COVID-19(26). A study  
44 in Sweden found an almost identical percentage reduction in primary care consultations (12%) as a results of the  
45 pandemic(27). Our results don't appear to be unique to England: while different countries can have different routes to  
46 diagnosis(28), different countries with different systems also observed disruptions to cancer pathways(29–32).

47  
48  
49 Whilst it was already known that there had been a substantial reduction in the number of overall cancer-related  
50 referrals(30,31) the quantification of this had been missing. Our findings, that primary care consultations in English NHS  
51 fell by 12.4% between January 2020 and January 2021 with urgent cancer referrals even more suppressed (20.2%),  
52 reflect how profound the pathway disruptions were for cancer patients. Furthermore, many cancers are picked up  
53 through the course of routine referrals from general practice for non-specific symptoms. The drop in routine referrals  
54 that we found (4.3 million, over this period) will inevitably translate into late-stage presentation and a substantial  
55

56  
57  
58 <sup>xiii</sup> They do not age-standardise their results

1 reduction in outcomes. This will include wider economic costs due to more expensive, late-stage treatment and  
2 productivity losses due to morbidity and premature mortality. However, the trajectory of the declines reflect not just  
3 changes to national policy in terms of NPI, but also knock-on effects around public behaviour, primary care staffing,  
4 downstream reductions in diagnostics and an overall increase in friction across all cancer pathways and systems.

5  
6 This reduction in cancer pathways through primary care needs to be put in the context of wider disruptions. The  
7 suspension of national cancer screening programmes meant that around 2 million people were not screened for cancer  
8 through national programs(32,33). Moreover, delays in cancer diagnoses and treatments have consistently been  
9 associated with poorer outcomes(1,2). The COVID-19 pandemic has also exacerbated the worst 62-day cancer waiting  
10 time targets in the last decade where 1 of 4 patients urgently referred from primary care between April 2020 and  
11 January 2021 did not receive treatment within 62 days(31).

12  
13 In our analysis of urgent cancer referrals by site in relation to reductions seen in first treatments significant differences  
14 were seen. Urological cancers (testis, renal, prostate and urothelial) have been particularly impacted with greater than  
15 25% decrease both in urgent referrals and first treatments. This suggests that outcomes will be particularly impacted in  
16 this group. Lung, skin and lower GI (colon and rectal) cancer also experienced significant declines in urgent referrals.  
17 Breast cancer was the least impacted of all in terms of urgent referrals but experienced a 25% reduction in first  
18 treatments. This highlights how much breast cancer diagnosis relies on screening programmes, which have suffered  
19 badly as a result of the pandemic(31). Although it is likely that some cancer patients have already been 'lost' to the  
20 system i.e. died of COVID-19 or other non-COVID-19 comorbidities, a significant number will now present with later  
21 stage disease.  
22  
23  
24

25 Our findings also reflect socioeconomic inequalities with more profound decrease in urgent cancer referrals and first  
26 treatments for the most deprived populations, despite relatively better preservation of consultation rates. This is  
27 unexpected and extremely worrying, indicating greater disruption to the diagnostic pathway for patients living in more  
28 deprived areas, whose cancer outcomes were typically worse than their less deprived counterparts pre-  
29 pandemic(34,35). Resilience in primary care is key for the cancer diagnosis pathway and must be developed. We know  
30 that there are challenges associated with resourcing health services in poorer areas (the inverse care law(36)), resulting  
31 in fewer resources per head of sick patient(10) and shorter consultation times(37). Further research should focus on  
32 understanding to what extent complex morbidity, which is greater in poorer areas(8,38), contributes to the disruption of  
33 the cancer diagnostic pathway. Greater understanding would help health systems better prepare for the kind of  
34 disruption we have seen as a result of COVID-19.  
35  
36  
37

### 38 **Limitations**

39  
40 This study uses multiple data sets to analyse a complex and disjointed pathway. We include a primary care data set that  
41 uses a relatively small (500,000) patient sample. However, the CPRD data produces results that closely mirror the rates  
42 of consultation per patient (and their reduction) produced in NHS Digital's appointments data(39). In addition, the  
43 estimated reduction in urgent cancer referrals is close to those presented in the NCRAS's analysis of their cancer registry  
44 data (Table 1a & Table 1b). It is not yet possible to link these data on a patient basis due to delays in data access and  
45 once possible further research would be illuminating.  
46  
47

### 48 **Conclusions**

49  
50 Our data reflects a disruption to a complex interaction of several systemic issues that place a great deal of impetus on  
51 the role of primary care in ensuring early diagnosis of cancer. Primary care was already under strain pre-pandemic, with  
52 low levels of investment and workforce deficits(40). Particularly in areas of high deprivation, general practice is under-  
53 funded and under staffed relative to need(7,8,10).  
54

55 Early cancer diagnosis requires concordance of each participant and mechanism - including patients' awareness and  
56 ability to present with cancer symptoms, the ability of GPs to detect and urgently refer possible cancer cases and  
57 sufficient diagnostic capacity (in terms of both workforce and equipment) to enable swift referrals and minimise delays  
58 to diagnosis and treatment. Every one of these nodes on the pathway to early diagnosis has been affected by the  
59

1 pandemic and the national policy response. However, further work is required as there is currently little understanding  
2 and even less evidence about how much each disruption is ultimately impacting cancer pathways.

3 The impact of the pandemic on cancer diagnosis and time to treatment shown here is very serious. However, what is  
4 more concerning is the unequal and inequitable impact on those worst off. Cancer as a disease area "*magnifies what we*  
5 *know to be true about the totality of the health care system. It exposes all its strengths and weaknesses*"(41). Our results  
6 further evidence the strain on primary care, the presence of the inverse care law(36), and the dire need to address the  
7 inequalities so sharply brought into focus by the pandemic. We need to address the disconnect between the importance  
8 we place on the role of primary care in cancer care and the resources we devote to it.  
9  
10  
11  
12  
13  
14  
15  
16  
17  
18  
19  
20  
21  
22  
23  
24  
25  
26  
27  
28  
29  
30  
31  
32  
33  
34  
35  
36  
37  
38  
39  
40  
41  
42  
43  
44  
45  
46  
47  
48  
49  
50  
51  
52  
53  
54  
55  
56  
57  
58  
59  
60

**Figure legends:**

Figure 1: Observed vs expected primary care activity, 01 Jan 2019 – 30 January 2021 (per 100,000 patient-months) (CPRD Aurum data) Panels: a. Consultations, b. Urgent cancer (2 week wait) referrals from primary care, c. Routine referrals from primary care

Figure 2: Percentage difference between observed and expected first treatments for new cancer and urgent cancer referrals by tumour location from NCRAS Cancer equity data pack (%), 01 Apr 2020 to 31 Jan 2021)

Figure 3: Percentage difference between observed and expected urgent cancer referrals and first treatments for cancer by IMD quintile (01 Apr 2020 – 31 Jan 2021)

**Contributors:** Data cleaning and analysis was conducted by TW. TW conceived the study with input from the coauthors and wrote the first draft. All the authors provided critical scholarly feedback on the manuscript. All the co-authors approved of the final version of the manuscript. TW and RS are the guarantors. The corresponding author attests that all listed authors meet authorship criteria and that no others meeting the criteria have been omitted.

**Competing interests:** None

**Funding:** This publication is funded through the UK Research and Innovation GCRF grant ES/P010962/1.

**Data Availability statement:**

**The primary care activity data may be obtained from a third party and are not publicly available.** We used de-identified primary care data from the Clinical Practice Research Datalink (CPRD). For more information please visit: <https://www.cprd.com/Data-access>, enquiries can be emailed to [enquiries@cprd.gov.uk](mailto:enquiries@cprd.gov.uk). Scientific approval for this study was given by the CPRD Independent Scientific Advisory Committee (ISAC). The study was approved by the Independent Scientific Advisory Committee for CPRD research (20\_143). The data is provided by patients and collected by the NHS as part of their care and support.

**Other data sources are available in a public, open access repository:** Cancer Wait Times at <https://www.england.nhs.uk/statistics/statistical-work-areas/cancer-waiting-times/> and the NCRAS Cancer data equity pack is available at [http://www.ncin.org.uk/local\\_cancer\\_intelligence/cadeas](http://www.ncin.org.uk/local_cancer_intelligence/cadeas).

## References

1. Maringe C, Spicer J, Morris M, Purushotham A, Nolte E, Sullivan R, et al. The impact of the COVID-19 pandemic on cancer deaths due to delays in diagnosis in England, UK: a national, population-based, modelling study. *Lancet Oncol.* 2020;21(8).
2. Hanna TP, King WD, Thibodeau S, Jalink M, Paulin GA, Harvey-Jones E, et al. Mortality due to cancer treatment delay: systematic review and meta-analysis. *BMJ.* 2020;371.
3. Purushotham A, Roberts G, Haire K, Dodkins J, Harvey-Jones E, Han L, et al. The impact of national non-pharmaceutical interventions ('lockdowns') on the presentation of cancer patients. *Ecancermedalscience.* 2021;15.
4. Health at a Glance: Europe 2020 [Internet]. OECD; 2020 [cited 2021 Oct 14]. (Health at a Glance: Europe). Available from: [https://www.oecd-ilibrary.org/social-issues-migration-health/health-at-a-glance-europe-2020\\_82129230-en](https://www.oecd-ilibrary.org/social-issues-migration-health/health-at-a-glance-europe-2020_82129230-en)
5. Meiklejohn JA, Mimery A, Martin JH, Bailie R, Garvey G, Walpole ET, et al. The role of the GP in follow-up cancer care: a systematic literature review. Vol. 10, *Journal of Cancer Survivorship.* 2016.
6. PHE. Routes to Diagnosis [Internet]. National Cancer Registration and Analysis Service. [cited 2021 Oct 14]. Available from: [http://www.ncin.org.uk/publications/routes\\_to\\_diagnosis](http://www.ncin.org.uk/publications/routes_to_diagnosis)
7. Parisi R, Lau YS, Bower P, Checkland K, Rubery J, Sutton M, et al. Rates of turnover among general practitioners: A retrospective study of all English general practices between 2007 and 2019. Vol. 11, *BMJ Open.* 2021.
8. Head A, Fleming K, Kypridemos C, Schofield P, Pearson-Stuttard J, O'Flaherty M. Inequalities in incident and prevalent multimorbidity in England, 2004–19: a population-based, descriptive study. *Lancet Heal Longev.* 2021;2(8).
9. DHSC, ONS. Direct and Indirect health impacts of COVID-19 in England [Internet]. London; 2021 Sep [cited 2021 Oct 14]. Available from: [https://assets.publishing.service.gov.uk/government/uploads/system/uploads/attachment\\_data/file/1018698/S1373\\_Direct\\_and\\_Indirect\\_Health\\_Impacts\\_of\\_C19\\_Detailed\\_Paper\\_.pdf](https://assets.publishing.service.gov.uk/government/uploads/system/uploads/attachment_data/file/1018698/S1373_Direct_and_Indirect_Health_Impacts_of_C19_Detailed_Paper_.pdf)
10. Fisher R, Dunn P, Asaria M, Thorlby R. Level or not? Comparing general practice in areas of high and low socioeconomic deprivation in England. London; 2020 Sep.
11. NHS. NHS Long Term Plan Summary. NHS Improv. 2019;
12. Moscrop A. Health inequalities in primary care: Time to face justice. Vol. 62, *British Journal of General Practice.* 2012.
13. Cookson R, Mondor L, Asaria M, Kringos DS, Klazinga NS, Wodchis WP. Primary care and health inequality: Difference-in-difference study comparing England and Ontario. *PLoS One.* 2017;12(11).
14. IFG. Timeline of UK coronavirus lockdowns, March 2020 to March 2021 [Internet]. Institute for Government . 2021 [cited 2021 Oct 14]. Available from: <https://www.instituteforgovernment.org.uk/sites/default/files/timeline-lockdown-web.pdf>
15. Health and Social Care Committee & Science and Technology Committee. Coronavirus: lessons learned to date [Internet]. London; 2021 Oct [cited 2021 Oct 14]. Available from: <https://committees.parliament.uk/work/657/coronavirus-lessons-learnt/news/157991/coronavirus-lessons-learned-to-date-report-published/>
16. Carr MJ, Steeg S, Webb RT, Kapur N, Chew-Graham CA, Abel KM, et al. Effects of the COVID-19 pandemic on primary care-recorded mental illness and self-harm episodes in the UK: a population-based cohort study. *Lancet Public Heal.* 2021;6(2).

- 1 17. Herrett E, Gallagher AM, Bhaskaran K, Forbes H, Mathur R, Staa T van, et al. Data Resource Profile: Clinical  
2 Practice Research Datalink (CPRD). *Int J Epidemiol*. 2015;44(3).
- 3 18. Padmanabhan S, Carty L, Cameron E, Ghosh RE, Williams R, Strongman H. Approach to record linkage of primary  
4 care data from Clinical Practice Research Datalink to other health-related patient data: overview and  
5 implications. *Eur J Epidemiol*. 2019;34(1).
- 6  
7 19. NHS, PHE. The Cancer Alliance Data, Evaluation and Analysis Service [Internet]. National Cancer Registration and  
8 Analysis Service: Local Cancer Intelligence. 2021 [cited 2021 Oct 14]. Available from:  
9 [http://www.ncin.org.uk/local\\_cancer\\_intelligence/cadeas#covid-19](http://www.ncin.org.uk/local_cancer_intelligence/cadeas#covid-19)  
10
- 11 20. Breslow NE, Day NE. Statistical methods in cancer research. Volume II--The design and analysis of cohort studies.  
12 IARC scientific publications. 1987.
- 13  
14 21. Raymond E, Thieblemont C, Alran S, Faivre S. Impact of the COVID-19 Outbreak on the Management of Patients  
15 with Cancer. Vol. 15, Targeted Oncology. 2020.
- 16  
17 22. UK Government. Staying at home and away from others (social distancing) [Internet]. Cabinet Office. 2020 [cited  
18 2021 Oct 29]. Available from: <https://www.gov.uk/government/publications/full-guidance-on-staying-at-home-and-away-from-others>  
19  
20
- 21 23. Wanat M, Hoste M, Gobat N, Anastasaki M, Böhmer F, Chlabicz S, et al. Transformation of primary care during  
22 the COVID-19 pandemic: Experiences of healthcare professionals in eight European countries. *Br J Gen Pract*.  
23 2021;71(709).
- 24  
25 24. Ekman B, Arvidsson E, Thulesius H, Wilkens J, Cronberg O. Impact of the Covid-19 pandemic on primary care  
26 utilization: evidence from Sweden using national register data. *BMC Res Notes*. 2021;14(1).
- 27  
28 25. Arnold M, Rutherford MJ, Bardot A, Ferlay J, Andersson TML, Myklebust TÅ, et al. Progress in cancer survival,  
29 mortality, and incidence in seven high-income countries 1995–2014 (ICBP SURVMARK-2): a population-based  
30 study. *Lancet Oncol*. 2019;20(11).
- 31  
32 26. Riera R, Bagattini ÂM, Pacheco RL, Pachito DV, Roitberg F, Ilbawi A. Delays and Disruptions in Cancer Health Care  
33 Due to COVID-19 Pandemic: Systematic Review. *JCO Glob Oncol*. 2021;(7).
- 34  
35 27. Gurney JK, Millar E, Dunn A, Pirie R, Mako M, Manderson J, et al. The impact of the COVID-19 pandemic on  
36 cancer diagnosis and service access in New Zealand—a country pursuing COVID-19 elimination. *Lancet Reg Heal -*  
37 *West Pacific*. 2021;10.
- 38  
39 28. Priou S, Lamé G, Chatellier G, Tournigand C, Kempf E. Effect of the COVID-19 pandemic on colorectal cancer care  
40 in France. Vol. 6, *The Lancet Gastroenterology and Hepatology*. 2021.
- 41  
42 29. Jacob L, Loosen SH, Kalder M, Luedde T, Roderburg C, Kostev K. Impact of the COVID-19 pandemic on cancer  
43 diagnoses in general and specialized practices in Germany. *Cancers (Basel)*. 2021;13(3).
- 44  
45 30. Morris EJA, Goldacre R, Spata E, Mafham M, Finan PJ, Shelton J, et al. Impact of the COVID-19 pandemic on the  
46 detection and management of colorectal cancer in England: a population-based study. *Lancet Gastroenterol*  
47 *Hepatol*. 2021;6(3).
- 48  
49 31. Cancer Waiting Times Team: NHS England and NHS Improvement. Cancer Wait Times Statistics [Internet]. NHS  
50 England. 2021 [cited 2021 Oct 25]. Available from: [https://www.england.nhs.uk/statistics/statistical-work-](https://www.england.nhs.uk/statistics/statistical-work-areas/cancer-waiting-times/)  
51 [areas/cancer-waiting-times/](https://www.england.nhs.uk/statistics/statistical-work-areas/cancer-waiting-times/)  
52
- 53 32. Sud A, Torr B, Jones ME, Broggio J, Scott S, Loveday C, et al. Effect of delays in the 2-week-wait cancer referral  
54 pathway during the COVID-19 pandemic on cancer survival in the UK: a modelling study. *Lancet Oncol*.  
55 2020;21(8).
- 56  
57 33. Greenwood E, Swanton C. Consequences of COVID-19 for cancer care — a CRUK perspective. Vol. 18, *Nature*  
58 *Reviews Clinical Oncology*. 2021.
- 59  
60



- 1  
2  
3  
4  
5  
6  
7  
8  
9  
10  
11  
12  
13  
14  
15  
16  
17  
18  
19  
20  
21  
22  
23  
24  
25  
26  
27  
28
34. Coleman MP, Rachet B, Woods LM, Mityr E, Riga M, Cooper N, et al. Trends and socioeconomic inequalities in cancer survival in England and Wales up to 2001. *Br J Cancer*. 2004;90(7).
  35. Cancer Research UK. Cancer incidence for all cancers combined: cancer incidence by deprivation [Internet]. 2020 [cited 2021 Oct 14]. Available from: <https://www.cancerresearchuk.org/health-professional/cancer-statistics/incidence/all-cancers-combined#heading-Three>
  36. Tudor Hart J. THE INVERSE CARE LAW. *Lancet*. 1971;297(7696).
  37. Gopfert A, Deeny SR, Fisher R, Stafford M. Primary care consultation length by deprivation and multimorbidity in England: An observational study using electronic patient records. *Br J Gen Pract*. 2021;71(704).
  38. Ingram E, Ledden S, Beardon S, Gomes M, Hogarth S, Mcdonald H, et al. Household and area-level social determinants of multimorbidity: a systematic review. Vol. 75, *Journal of Epidemiology and Community Health*. 2021.
  39. NHS. Appointments in General Practice - September 2021 [Internet]. NHS Digital. 2021 [cited 2021 Nov 16]. Available from: <https://digital.nhs.uk/data-and-information/publications/statistical/appointments-in-general-practice>
  40. Roland M, Everington S. Tackling the crisis in general practice. *BMJ*. 2016;
  41. Levit LA, Balogh EP, Nass SJ, Ganz PA. Delivering high-quality cancer care: Charting a new course for a system in crisis. *Delivering High-Quality Cancer Care: Charting a New Course for a System in Crisis*. 2014.

## Key messages

- 29  
30  
31  
32  
33  
34  
35  
36  
37  
38  
39  
40  
41  
42  
43  
44  
45  
46  
47  
48  
49  
50  
51  
52  
53  
54  
55  
56  
57  
58  
59  
60
- Primary care is key part of the pathway for early cancer diagnosis through both routine and 2ww referrals
  - Cancer diagnosis rates have experienced a sustained fall since the start of the COVID-19 pandemic and introduction of non-pharmaceutical interventions (NPIs) 'lockdowns'.
  - The fall in urgent cancer referral is larger than the fall in primary care contacts, implying that the content of consultations has shifted away from potential cancer diagnosis.
  - Despite having a smaller reduction in primary care contact through the pandemic, patients living in poorer areas have had larger reductions in urgent cancer referrals and first treatments for new cancer.
  - Government, patients and primary care staff must work together to catch up on missing diagnosis.
  - Resilience in primary care is key for the cancer diagnosis pathway and must be developed for future disruptions, particularly in poorer areas where care is more complex.

1  
2  
3  
4  
5  
6  
7  
8  
9  
10  
11  
12  
13  
14  
15  
16  
17  
18  
19  
20  
21  
22  
23  
24  
25  
26  
27  
28  
29  
30  
31  
32  
33  
34  
35  
36  
37  
38  
39  
40  
41  
42  
43  
44  
45  
46  
47  
48  
49  
50  
51  
52  
53  
54  
55  
56  
57  
58  
59  
60

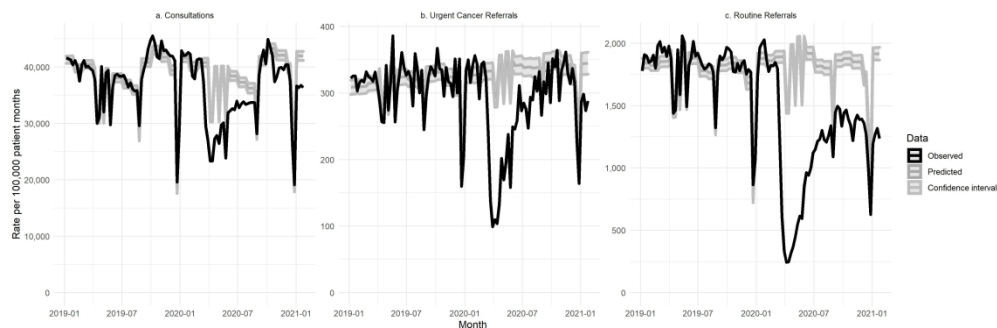

Figure 1: Observed vs expected primary care activity, 01 Jan 2019 – 30 January 2021 (per 100,000 patient-months) (CPRD Aurum data) Panels: a. Consultations, b. Urgent cancer (2 week wait) referrals from primary care, c. Routine referrals from primary care

381x127mm (300 x 300 DPI)



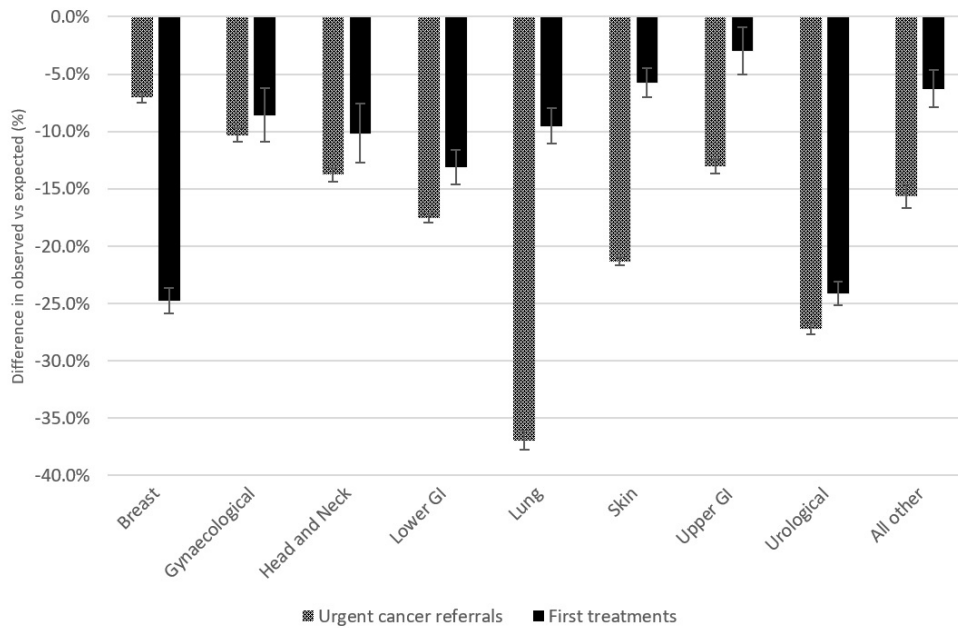

Figure 2: Percentage difference between observed and expected first treatments for new cancer and urgent cancer referrals by tumour location from NCRAS Cancer equity data pack (% , 01 Apr 2020 to 31 Jan 2021)

233x150mm (120 x 120 DPI)

1  
2  
3  
4  
5  
6  
7  
8  
9  
10  
11  
12  
13  
14  
15  
16  
17  
18  
19  
20  
21  
22  
23  
24  
25  
26  
27  
28  
29  
30  
31  
32  
33  
34  
35  
36  
37  
38  
39  
40  
41  
42  
43  
44  
45  
46  
47  
48  
49  
50  
51  
52  
53  
54  
55  
56  
57  
58  
59  
60

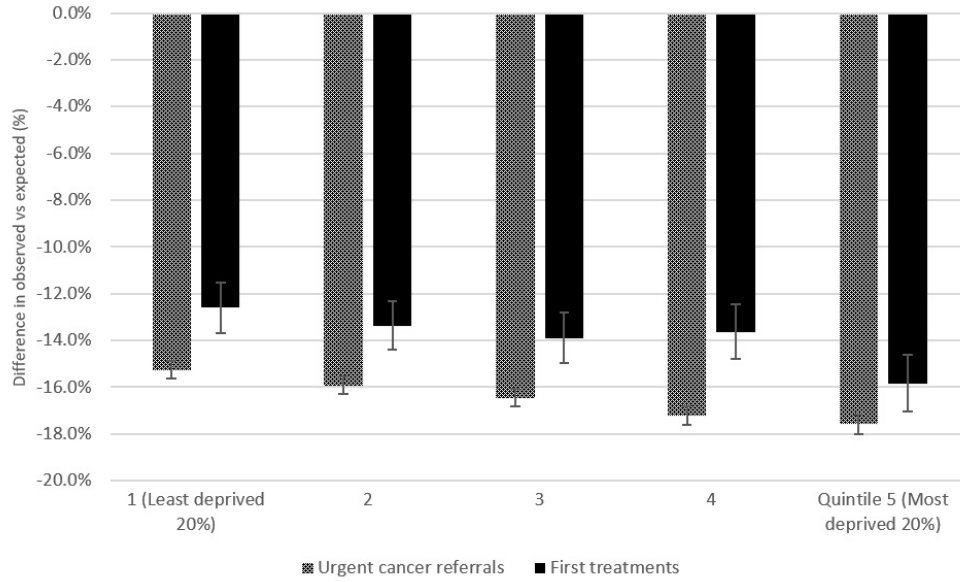

Figure 3: Percentage difference between observed and expected urgent cancer referrals and first treatments for cancer by IMD quintile (01 Apr 2020 – 31 Jan 2021)

205x122mm (120 x 120 DPI)

## Annex 1: NCRAS data equity pack, technical notes

CADEAS and NCRAS have produced two equity data packs presenting the latest national data on the number of urgent suspected two-week wait referrals and first definitive treatments for cancer. These data packs are produced on the basis of the Cancer Wait Times data, with analysis from Hospital Episode Statistics (HES) and other sources outlined in their technical notes.

“Any differences between treatment volumes in the published official statistics and the volumes presented in this pack are because:

- Data was extracted from the CWT system at a slightly different time.
- Data included here is based on England residents only.

Additional logic has been applied to remove treatments where some of the information required for this equity analysis is missing or there are potential data quality issues, for example cases with a mismatch between the suspected cancer referral type and sex (eg. gynaecological cancer treatments for men, testicular cancer treatments for women), and suspected cancer referral type and age (eg. suspected children's cancer for patients aged 20 and over).” – NCRAS Cancer data equity pack technical notes, final tab within the downloaded spreadsheet. Available under “Links to data”:

[http://www.ncin.org.uk/local\\_cancer\\_intelligence/cadeas](http://www.ncin.org.uk/local_cancer_intelligence/cadeas) as at 26/01/2022

## Annex 2: Consultation definition

CPRD Aurum data dictionary sets out the structure of the data. Within the consultation file there are two variables one can use to identify whether a primary care contact, rather than an administrative note (“EMIS® consultation source identifier” and “Consultation source code identifier”).

The EMIS consultation source identifier is the primary variable used. We include the following observations of this variable:

Acute visit, Casualty attendance, Clinic, Emergency appointment, Emergency consultation, Enterprise consultation, Face to face consultation, Follow-up/routine visit, Gp surgery, Home visit, Home visit note, Main surgery, Nursing home, Nursing home visit note, Online services message, Other, Residential home, Residential home visit note, Same day appointment, Surgery consultation, Telephone encounter, Urgent consultation, Walk-in centre, Walk-in clinic

We also include instances where EMIS consultation source identifier is “awaiting review” and the Consultation source code identifier is in the following list:

Consultation, visit, seen in gp unit, seen in private clinic, seen in rapid access clinic at gp surgery, seen in urgent care centre, online communication.

We then further exclude records on the basis of the category of staff responsible for the record. The “[Job category](#)” variable from the staff file, linked by the consultation id is used. We only include as a consultation records filled out by GPs, doctors, nurses and other health care professionals as defined in CPRD’s numerical codes listed below:

GP – 4, 5, 15, 24, 31, 181, 183

Dr – 1, 41, 91, 116, 119, 121, 126, 173, 177, 197

Nurse – 8, 9, 27, 33, 47, 48, 50, 55, 59, 60, 61, 111

Other healthcare professional - 2, 3, 6, 7, 10:14, 16, 17, 34:37, 42, 43, 52, 54, 58, 62:65, 68, 72, 73, 77, 80, 82, 83, 86:89, 94, 95, 97, 100:102, 105, 106, 112:114, 118, 122, 125, 127, 131, 135, 136, 138, 141, 142, 145, 148, 149, 154, 156, 158, 168, 185, 186, 188, 189, 204, 208

In Table A2.1 we present the CPRD Aurum Staff Category list.

In Table A2.2 we present the total number of consultations identified from 01 January 2016 to 31 January 2021, the count with each combination of staff category, “EMIS® consultation source identifier” and “Consultation source code identifier” in Table A2.2 we show the count of records that were excluded, highlighting those that were excluded on the basis of staff category, not the consultation file description variables.

Table A2.1: CPRD Aurum Staff Job Categories

|    |                                                  |                                              |
|----|--------------------------------------------------|----------------------------------------------|
| 1  |                                                  |                                              |
| 2  |                                                  |                                              |
| 3  | Table A2.1: CPRD Aurum Staff Job Categories      |                                              |
| 4  |                                                  |                                              |
| 5  | 1 Consultant                                     | 51 Helper/Assistant                          |
| 6  | 2 Hospital Practitioner                          | 52 Community Mental Health Nurse             |
| 7  | 3 Clinical Medical Officer                       | 53 Senior Administrator                      |
| 8  | 4 General Medical Practitioner                   | 54 Technician - Healthcare Scientists        |
| 9  | 5 Salaried General Practitioner                  | 55 Associate Practitioner - Nurse            |
| 10 | 6 Midwife - Sister/Charge Nurse                  | 56 Senior Manager                            |
| 11 | 7 Midwife                                        | 57 Community Administrator                   |
| 12 | 8 Community Practitioner                         | 58 Associate Specialist                      |
| 13 | 9 Community Nurse                                | 59 Student Practice Nurse                    |
| 14 | 10 Chiropodist/Podiatrist                        | 60 Nurse Manager                             |
| 15 | 11 Dietitian                                     | 61 Sister/Charge Nurse                       |
| 16 | 12 Pharmacist                                    | 62 Psychotherapist                           |
| 17 | 13 Clinical Psychologist                         | 63 Osteopath                                 |
| 18 | 14 Health Care Support Worker                    | 64 Social Care Support Worker                |
| 19 | 15 Associate Practitioner - General Practitioner | 65 Assistant Psychologist                    |
| 20 | 16 Counsellor                                    | 66 Officer                                   |
| 21 | 17 Phlebotomist                                  | 67 Technician - Admin & Clerical             |
| 22 | 18 Clerical Worker                               | 68 Psychiatrist                              |
| 23 | 19 Manager                                       | 69 Health Records Clerk                      |
| 24 | 20 Analyst                                       | 70 Desktop Support Technician                |
| 25 | 21 System Administrator                          | 71 Dispenser                                 |
| 26 | 22 Desktop Support Administrator                 | 72 Clinical Assistant                        |
| 27 | 23 System Worker                                 | 73 Practitioner                              |
| 28 | 24 GP Registrar                                  | 74 Information Officer                       |
| 29 | 25 Medical Student                               | 75 Network Administrator                     |
| 30 | 26 Other Community Health Service - Admin Clerk  | 76 Chaplain                                  |
| 31 | 27 Specialist Nurse Practitioner                 | 77 Student Physiotherapist                   |
| 32 | 28 Receptionist                                  | 78 Paramedic Specialist Practitioner         |
| 33 | 29 Secretary                                     | 79 Clinical Team Manager                     |
| 34 | 30 Medical Secretary                             | 80 Physiotherapist Specialist Practitioner   |
| 35 | 31 Sessional GP                                  | 81 Helpdesk Technician                       |
| 36 | 32 Clinical Application Administrator            | 82 Radiographer                              |
| 37 | 33 Nurse Consultant                              | 83 Other Community Health Service            |
| 38 | 34 Physiotherapist                               | 84 Call Operator                             |
| 39 | 35 Specialist Practitioner                       | 85 Community Worker (children)               |
| 40 | 36 Healthcare Assistant                          | 86 Paramedic Consultant                      |
| 41 | 37 Medical Technical Officer - Pharmacy          | 87 Associate Practitioner                    |
| 42 | 38 Health Records Administrator                  | 88 Modern Matron                             |
| 43 | 39 Helpdesk Administrator                        | 89 Asst. Clinical Medical Officer            |
| 44 | 40 Appointments Clerk                            | 90 Community Team Manager                    |
| 45 | 41 Senior House Officer                          | 91 Specialist Registrar                      |
| 46 | 42 Social Worker                                 | 92 Chiropodist/Podiatrist Manager            |
| 47 | 43 Trainee Practitioner                          | 93 Radiographer - Therapeutic, Manager       |
| 48 | 44 Network Technician                            | 94 Optometrist                               |
| 49 | 45 Clinical Coder                                | 95 Assistant Practitioner                    |
| 50 | 46 Medical Records Clerk                         | 96 Community Learning Disabilities Nurse     |
| 51 | 47 Staff Nurse                                   | 97 Technician - Additional Clinical Services |
| 52 | 48 Enrolled Nurse                                | 98 Student Health Visitor                    |
| 53 | 49 Multi Therapist                               | 99 Interpreter                               |
| 54 | 50 Nursery Nurse                                 | 100 Medical Technical Officer                |
| 55 |                                                  |                                              |
| 56 |                                                  |                                              |
| 57 |                                                  |                                              |
| 58 |                                                  |                                              |
| 59 |                                                  |                                              |
| 60 |                                                  |                                              |

|    |                                                    |                                                         |
|----|----------------------------------------------------|---------------------------------------------------------|
| 1  |                                                    |                                                         |
| 2  |                                                    |                                                         |
| 3  | 101 Midwife - Specialist Practitioner              |                                                         |
| 4  | 102 Occupational Therapist                         |                                                         |
| 5  | 103 Chief Executive                                |                                                         |
| 6  | 104 Audit Manager                                  | 151 Finance Director                                    |
| 7  | 105 Paramedic                                      | 152 Senior social worker (adults)                       |
| 8  | 106 Physiotherapist Consultant                     | 153 Student Midwife                                     |
| 9  | 107 Availability Monitor                           | 154 Radiologist                                         |
| 10 | 108 Medical Laboratory Assistant                   | 155 Ward Manager                                        |
| 11 | 109 Gateway Worker                                 | 156 Midwife - Manager                                   |
| 12 | 110 Medical Records Manager                        | 157 Waiting List Manager                                |
| 13 | 111 Student Nurse - Adult Branch                   | 158 Radiographer - Diagnostic, Specialist Practitioner  |
| 14 | 112 Audiologist                                    | 159 Biomedical Scientist                                |
| 15 | 113 Radiographer - Diagnostic                      | 160 Board Level Director                                |
| 16 | 114 Therapist                                      | 161 Non Executive Director                              |
| 17 | 115 Student District Nurse                         | 162 Nursing Cadet                                       |
| 18 | 116 House Officer - Post Registration              | 163 Porter                                              |
| 19 | 117 Speech & Language Therapist                    | 164 Social services care manager (adults)               |
| 20 | 118 Dietitian Specialist Practitioner              | 165 Student Psychotherapist                             |
| 21 | 119 Trust Grade Doctor - SHO level                 | 166 Orthoptist                                          |
| 22 | 120 Director of Public Health                      | 167 Clinical Director - Medical                         |
| 23 | 121 Staff Grade                                    | 168 Approved Social Worker                              |
| 24 | 122 Patient Welfare Officer                        | 169 Student Community Mental Health Nurse               |
| 25 | 123 Occupational Therapy Specialist Practitioner   | 170 Other Executive Director                            |
| 26 | 124 Technician - PS&T                              | 171 Student Orthoptist                                  |
| 27 | 125 Chiropodist/Podiatrist Consultant              | 172 Childcare Co-ordinator                              |
| 28 | 126 Trust Grade Doctor - Career Grade level        | 173 House Officer - Pre Registration                    |
| 29 | 127 Student Community Practitioner                 | 174 SODP                                                |
| 30 | 128 Healthcare Scientist                           | 175 Outpatient Manager                                  |
| 31 | 129 Waiting List Clerk                             | 176 Medical Director                                    |
| 32 | 130 Clinical Director                              | 177 Trust Grade Doctor - Specialist Registrar level     |
| 33 | 131 Pre-reg Pharmacist                             | 178 Senior Clinical Medical Officer                     |
| 34 | 132 Mental Health Act Administrator                | 179 Consultant Healthcare Scientist                     |
| 35 | 133 Ward Clerk                                     | 180 Reporting Radiographer                              |
| 36 | 134 Support, Time, Recovery Worker                 | 181 Locum GP                                            |
| 37 | 135 Art Therapist Specialist Practitioner          | 182 Researcher                                          |
| 38 | 136 Physiotherapist Manager                        | 183 Assistant GP                                        |
| 39 | 137 Healthcare Cadet                               | 184 Special salary scale in Public Health Medicine      |
| 40 | 138 Dietitian Consultant                           | 185 Advanced Practitioner                               |
| 41 | 139 Orthoptist Manager                             | 186 Health Visitor                                      |
| 42 | 140 Social work assistant (mental health)          | 187 Dental Assistant Clinical Director                  |
| 43 | 141 Chiropodist/Podiatrist Specialist Practitioner | 188 Other Community Health Service - Social Care Worker |
| 44 | 142 Student Technician                             | 189 Physician Assistant                                 |
| 45 | 143 Complaints Investigator                        | 190 Deputising Doctor                                   |
| 46 | 144 Trainee Scientist                              | 191 Student Occupational Health Nurse                   |
| 47 | 145 Radiographer - Diagnostic, Manager             | 192 Senior social worker (mental health)                |
| 48 | 146 Social services care manager (mental health)   | 193 Regional Dental Officer                             |
| 49 | 147 Dietitian Manager                              | 194 Trainer                                             |
| 50 | 148 Midwife - Consultant                           | 195 Cytoscreener                                        |
| 51 | 149 Art Therapist Consultant                       | 196 Chair                                               |
| 52 | 150 Paramedic Manager                              | 197 Trust Grade Doctor - House Officer level            |
| 53 |                                                    | 198 Art Therapist                                       |
| 54 | 201 Healthcare Science Assistant                   | 199 Multi Therapist Specialist Practitioner             |
| 55 | 202 Social work assistant (adults)                 | 200 Drama Therapist                                     |
| 56 | 203 Social work team manager (adults)              |                                                         |
| 57 |                                                    |                                                         |
| 58 |                                                    |                                                         |
| 59 |                                                    |                                                         |
| 60 |                                                    |                                                         |

1  
2  
3 204 Intermediate Care worker  
4 205 Student Occupational Therapist  
5 206 Student Dietitian  
6 207 Healthcare Science Associate  
7 208 Child Protection worker  
8 209 Professor  
9 210 General Dental Practitioner  
10 211 Student School Nurse  
11 212 Occupational Therapist Consultant  
12 213 Intermediate Care staff  
13 214 Home help  
14 215 Art, Music & Drama Student  
15 216 Specialist Healthcare Scientist  
16 217 Social Services information manager  
17  
18  
19  
20  
21  
22  
23  
24  
25  
26  
27  
28  
29  
30  
31  
32  
33  
34  
35  
36  
37  
38  
39

Table A2.2: Number of observations by EMIS® consultation source identifier, Consultation source code identifier and Staff Job Category, with an indicator for whether it was included as a consultation: Include: 1 = Include, 0 = Exclude, "Excl. job title" = Excluded on the basis of job title.

| Include | Staff Job Category  | Consultation source code identifier | EMIS consultation source identifier | Count     |
|---------|---------------------|-------------------------------------|-------------------------------------|-----------|
| 1       | gp                  | gp surgery                          | gp surgery                          | 3,119,080 |
| 1       | nurse               | gp surgery                          | gp surgery                          | 1,692,606 |
| 1       | gp                  | telephone consultation              | telephone consultation              | 1,471,946 |
| 1       | other care provider | gp surgery                          | gp surgery                          | 977,067   |
| 1       | nurse               | telephone consultation              | telephone consultation              | 196,665   |
| 1       | gp                  | telephone call to a patient         | telephone call to a patient         | 108,025   |
| 1       | gp                  | home visit note                     | home visit note                     | 83,600    |
| 1       | other care provider | telephone consultation              | telephone consultation              | 81,980    |
| 1       | nurse               | telephone call to a patient         | telephone call to a patient         | 32,423    |
| 1       | gp                  | face to face consultation           | face to face consultation           | 25,435    |
| 1       | nurse               | home visit note                     | home visit note                     | 24,174    |
| 1       | other care provider | telephone call to a patient         | telephone call to a patient         | 23,194    |
| 1       | gp                  | gp surgery                          | surgery consultation                | 22,756    |

|    |   |            |                                   |                               |        |
|----|---|------------|-----------------------------------|-------------------------------|--------|
| 1  |   |            |                                   |                               |        |
| 2  |   |            |                                   |                               |        |
| 3  |   |            |                                   |                               |        |
| 4  | 1 | gp         | nursing home visit note           | nursing home visit note       | 21,357 |
| 5  | 1 | nurse      | face to face consultation         | face to face consultation     | 17,580 |
| 6  | 1 | gp         | enterprise consultation           | enterprise consultation       | 14,904 |
| 7  | 1 | gp         | telephone call from a patient     | telephone call from a patient | 13,062 |
| 8  | 1 | gp         | routine consultation              | surgery consultation          | 11,668 |
| 9  |   | other care |                                   |                               |        |
| 10 | 1 | provider   | home visit note                   | home visit note               | 10,853 |
| 11 |   |            | provision of general practitioner |                               |        |
| 12 | 1 | gp         | intermediate care                 | gp surgery                    | 10,441 |
| 13 | 1 | gp         | emergency consultation            | emergency consultation        | 10,351 |
| 14 |   |            | residential home visit note       | residential home visit note   | 9,579  |
| 15 | 1 | gp         | residential home visit note       | residential home visit note   | 9,579  |
| 16 |   | other care |                                   |                               |        |
| 17 | 1 | provider   | face to face consultation         | face to face consultation     | 9,350  |
| 18 | 1 | gp         | emergency appointment             | emergency appointment         | 8,687  |
| 19 | 1 | gp         | urgent consultation               | urgent consultation           | 8,155  |
| 20 | 1 | gp         | walk-in clinic                    | walk-in clinic                | 7,908  |
| 21 | 1 | dr         | gp surgery                        | gp surgery                    | 7,654  |
| 22 |   |            | other note                        | other                         | 7,520  |
| 23 | 1 | gp         | other note                        | other                         | 7,520  |
| 24 | 1 | gp         | face to face consultation         | surgery consultation          | 6,932  |
| 25 | 1 | nurse      | gp surgery                        | surgery consultation          | 5,318  |
| 26 | 1 | gp         | seen in gp unit                   | surgery consultation          | 4,687  |
| 27 |   |            | consultation via video conference | awaiting review               | 4,653  |
| 28 | 1 | gp         | consultation via video conference | awaiting review               | 4,653  |
| 29 | 1 | nurse      | enterprise consultation           | enterprise consultation       | 4,460  |
| 30 |   | other care | provision of general practitioner |                               |        |
| 31 | 1 | provider   | intermediate care                 | gp surgery                    | 4,369  |
| 32 | 1 | gp         | clinic note                       | surgery consultation          | 3,823  |
| 33 | 1 | nurse      | residential home visit note       | residential home visit note   | 3,612  |
| 34 | 1 | nurse      | clinic note                       | clinic                        | 3,585  |
| 35 |   |            | nursing home visit note           | nursing home visit note       | 3,528  |
| 36 | 1 | nurse      | nursing home visit note           | nursing home visit note       | 3,528  |
| 37 | 1 | nurse      | face to face consultation         | surgery consultation          | 3,442  |
| 38 | 1 | gp         | online communication              | awaiting review               | 3,410  |
| 39 |   | other care |                                   |                               |        |
| 40 | 1 | provider   | other note                        | other                         | 3,406  |
| 41 |   | other care |                                   |                               |        |
| 42 | 1 | provider   | seen in gp unit                   | gp surgery                    | 2,781  |
| 43 | 1 | gp         | e-mail consultation               | awaiting review               | 2,523  |
| 44 |   |            | other note                        | other                         | 2,449  |
| 45 |   | other care |                                   |                               |        |
| 46 | 1 | provider   | gp surgery                        | surgery consultation          | 2,334  |
| 47 |   | other care |                                   |                               |        |
| 48 | 1 | provider   | enterprise consultation           | enterprise consultation       | 2,318  |
| 49 |   | other care |                                   |                               |        |
| 50 | 1 | provider   | telephone call from a patient     | telephone call from a patient | 2,211  |
| 51 |   |            | telephone call from a patient     | telephone call from a patient | 2,183  |
| 52 | 1 | nurse      | telephone call from a patient     | telephone call from a patient | 2,183  |
| 53 | 1 | gp         | routine consultation              | awaiting review               | 2,117  |
| 54 | 1 | nurse      | emergency appointment             | emergency appointment         | 2,041  |
| 55 | 1 | gp         | home visit note                   | home visit                    | 2,021  |
| 56 |   |            | seen in gp unit                   | gp surgery                    | 1,896  |
| 57 | 1 | gp         | seen in gp unit                   | gp surgery                    | 1,896  |
| 58 |   |            | provision of general practitioner |                               |        |
| 59 | 1 | nurse      | intermediate care                 | gp surgery                    | 1,762  |
| 60 |   |            |                                   |                               |        |

|    |   |                     |                                               |                             |       |
|----|---|---------------------|-----------------------------------------------|-----------------------------|-------|
| 1  |   |                     |                                               |                             |       |
| 2  |   |                     |                                               |                             |       |
| 3  |   |                     |                                               |                             |       |
| 4  | 1 | other care provider | clinic note                                   | clinic                      | 1,699 |
| 5  | 1 | nurse               | clinic note                                   | surgery consultation        | 1,628 |
| 6  | 1 | gp                  | clinic note                                   | clinic                      | 1,623 |
| 7  | 1 | nurse               | routine consultation                          | surgery consultation        | 1,578 |
| 8  | 1 | nurse               | seen in gp unit                               | surgery consultation        | 1,426 |
| 9  | 1 | nurse               | walk-in clinic                                | walk-in clinic              | 1,412 |
| 10 | 1 | nurse               | gp surgery                                    | clinic                      | 1,355 |
| 11 | 1 | other care provider | routine consultation                          | other                       | 1,303 |
| 12 | 1 | other care provider | clinic note                                   | surgery consultation        | 1,297 |
| 13 | 1 | gp                  | face to face consultation                     | emergency consultation      | 1,292 |
| 14 | 1 | other care provider | walk-in clinic                                | walk-in clinic              | 1,216 |
| 15 | 1 | gp                  | telephone encounter                           | telephone encounter         | 1,184 |
| 16 | 1 | gp                  | online communication                          | online services message     | 1,139 |
| 17 | 1 | gp                  | other consultation medium used                | awaiting review             | 1,134 |
| 18 | 1 | other care provider | residential home visit note                   | residential home visit note | 1,113 |
| 19 | 1 | nurse               | seen in gp unit                               | gp surgery                  | 1,103 |
| 20 | 1 | other care provider | nursing home visit note                       | nursing home visit note     | 1,081 |
| 21 | 1 | other care provider | face to face consultation                     | surgery consultation        | 1,045 |
| 22 | 1 | other care provider | seen in gp unit                               | surgery consultation        | 1,043 |
| 23 | 1 | nurse               | emergency consultation                        | emergency consultation      | 1,024 |
| 24 | 1 | nurse               | urgent consultation                           | urgent consultation         | 959   |
| 25 | 1 | gp                  | extended hours consultation                   | awaiting review             | 924   |
| 26 | 1 | gp                  | routine consultation                          | other                       | 922   |
| 27 | 1 | gp                  | home visit note                               | other                       | 835   |
| 28 | 1 | gp                  | gp surgery                                    | face to face consultation   | 808   |
| 29 | 1 | other care provider | gp surgery                                    | clinic                      | 746   |
| 30 | 1 | other care provider | routine consultation                          | surgery consultation        | 738   |
| 31 | 1 | gp                  | consultation via multimedia                   | awaiting review             | 734   |
| 32 | 1 | gp                  | face to face consultation with relative/carer | awaiting review             | 669   |
| 33 | 1 | nurse               | e-mail consultation                           | awaiting review             | 638   |
| 34 | 1 | nurse               | routine consultation                          | awaiting review             | 574   |
| 35 | 1 | nurse               | consultation via video conference             | awaiting review             | 505   |
| 36 | 1 | nurse               | routine consultation                          | other                       | 478   |
| 37 | 1 | other care provider | online communication                          | awaiting review             | 473   |
| 38 | 1 | nurse               | same day appointment                          | same day appointment        | 468   |
| 39 | 1 | gp                  | face to face consultation                     | gp surgery                  | 461   |
| 40 | 1 | gp                  | same day appointment                          | same day appointment        | 457   |
| 41 | 1 | nurse               | gp surgery                                    | face to face consultation   | 455   |
| 42 | 1 | gp                  | telephone encounter                           | telephone consultation      | 429   |
| 43 | 1 | nurse               | face to face consultation                     | emergency consultation      | 420   |



|    |   |                     |                                                |                             |     |
|----|---|---------------------|------------------------------------------------|-----------------------------|-----|
| 1  |   |                     |                                                |                             |     |
| 2  |   |                     |                                                |                             |     |
| 3  |   |                     |                                                |                             |     |
| 4  | 1 | gp                  | group consultation                             | awaiting review             | 402 |
| 5  | 1 | nurse               | home visit note                                | other                       | 402 |
| 6  | 1 | nurse               | seen in urgent care centre                     | awaiting review             | 344 |
| 7  | 1 | gp                  | face to face consultation                      | emergency appointment       | 330 |
| 8  | 1 | gp                  | seen in urgent care centre                     | awaiting review             | 322 |
| 9  | 1 | nurse               | telephone encounter                            | telephone encounter         | 314 |
| 10 |   |                     |                                                |                             |     |
| 11 | 1 | other care provider | consultation via video conference              | awaiting review             | 288 |
| 12 |   |                     |                                                |                             |     |
| 13 | 1 | gp                  | telephone consultation                         | telephone call to a patient | 287 |
| 14 | 1 | dr                  | telephone consultation                         | telephone consultation      | 279 |
| 15 | 1 | nurse               | online communication                           | awaiting review             | 279 |
| 16 |   |                     |                                                |                             |     |
| 17 | 1 | other care provider | face to face consultation                      | awaiting review             | 272 |
| 18 |   |                     |                                                |                             |     |
| 19 | 1 | other care provider | home visit note                                | home visit                  | 262 |
| 20 |   |                     |                                                |                             |     |
| 21 | 1 | other care provider | routine consultation                           | awaiting review             | 260 |
| 22 | 1 | nurse               | home visit note                                | home visit                  | 246 |
| 23 |   |                     |                                                |                             |     |
| 24 | 1 | gp                  | consultation via sms text message              | awaiting review             | 244 |
| 25 |   |                     |                                                |                             |     |
| 26 | 1 | other care provider | online communication                           | online services message     | 241 |
| 27 |   |                     |                                                |                             |     |
| 28 | 1 | other care provider | emergency consultation                         | emergency consultation      | 235 |
| 29 |   |                     |                                                |                             |     |
| 30 | 1 | other care provider | emergency appointment                          | emergency appointment       | 231 |
| 31 | 1 | gp                  | telephone encounter                            | telephone call to a patient | 226 |
| 32 | 1 | gp                  | residential home visit note                    | residential home            | 225 |
| 33 |   |                     |                                                |                             |     |
| 34 | 1 | gp                  | face to face consultation                      | awaiting review             | 224 |
| 35 | 1 | nurse               | face to face consultation                      | gp surgery                  | 221 |
| 36 |   |                     |                                                |                             |     |
| 37 | 1 | other care provider | gp surgery                                     | face to face consultation   | 209 |
| 38 | 1 | nurse               | extended hours consultation                    | awaiting review             | 186 |
| 39 |   |                     |                                                |                             |     |
| 40 | 1 | gp                  | seen in rapid access clinic at gp surgery      | awaiting review             | 182 |
| 41 | 1 | gp                  | school visit note                              | awaiting review             | 181 |
| 42 |   |                     |                                                |                             |     |
| 43 | 1 | other care provider | telephone consultation                         | telephone call to a patient | 179 |
| 44 | 1 | nurse               | face to face consultation                      | awaiting review             | 166 |
| 45 | 1 | gp                  | home visit note                                | acute visit                 | 153 |
| 46 | 1 | nurse               | online communication                           | online services message     | 145 |
| 47 |   |                     |                                                |                             |     |
| 48 | 1 | other care provider | group consultation                             | awaiting review             | 133 |
| 49 |   |                     |                                                |                             |     |
| 50 | 1 | gp                  | seen in gp unit                                | awaiting review             | 129 |
| 51 | 1 | dr                  | clinic note                                    | surgery consultation        | 125 |
| 52 |   |                     |                                                |                             |     |
| 53 | 1 | other care provider | telephone encounter                            | telephone encounter         | 119 |
| 54 |   |                     |                                                |                             |     |
| 55 | 1 | other care provider | extended hours consultation                    | awaiting review             | 116 |
| 56 |   |                     |                                                |                             |     |
| 57 | 1 | nurse               | face to face consultation with relative/carers | awaiting review             | 115 |
| 58 | 1 | nurse               | seen in gp unit                                | awaiting review             | 109 |
| 59 | 1 | gp                  | night visit note                               | awaiting review             | 108 |

|    |   |                     |                                               |                               |     |
|----|---|---------------------|-----------------------------------------------|-------------------------------|-----|
| 1  |   |                     |                                               |                               |     |
| 2  |   |                     |                                               |                               |     |
| 3  | 1 | nurse               | school visit note                             | awaiting review               | 107 |
| 4  | 1 | nurse               | group consultation                            | awaiting review               | 102 |
| 5  | 1 | gp                  | other consultation medium used                | other                         | 99  |
| 6  | 1 | gp                  | children's home visit note                    | awaiting review               | 95  |
| 7  | 1 | gp                  | telephone consultation                        | telephone call from a patient | 94  |
| 8  | 1 | gp                  | administration note                           | other                         | 91  |
| 9  |   |                     |                                               |                               |     |
| 10 | 1 | nurse               | telephone encounter                           | telephone call to a patient   | 86  |
| 11 |   |                     |                                               |                               |     |
| 12 | 1 | other care provider | e-mail consultation                           | awaiting review               | 71  |
| 13 | 1 | nurse               | consultation via multimedia                   | awaiting review               | 65  |
| 14 | 1 | gp                  | gp surgery                                    | clinic                        | 63  |
| 15 | 1 | nurse               | telephone consultation                        | telephone call to a patient   | 63  |
| 16 |   |                     |                                               |                               |     |
| 17 | 1 | other care provider | face to face consultation with relative/carer | awaiting review               | 62  |
| 18 |   |                     |                                               |                               |     |
| 19 |   |                     |                                               |                               |     |
| 20 | 1 | gp                  | consultation via telemedicine web camera      | awaiting review               | 61  |
| 21 | 1 | dr                  | telephone call to a patient                   | telephone call to a patient   | 60  |
| 22 |   |                     |                                               |                               |     |
| 23 | 1 | nurse               | laboratory result                             | clinic                        | 55  |
| 24 |   |                     |                                               |                               |     |
| 25 | 1 | other care provider | other consultation medium used                | awaiting review               | 53  |
| 26 | 1 | nurse               | other consultation medium used                | awaiting review               | 51  |
| 27 | 1 | nurse               | district nurse visit                          | awaiting review               | 48  |
| 28 | 1 | gp                  | clinic note                                   | gp surgery                    | 47  |
| 29 |   |                     |                                               |                               |     |
| 30 | 1 | other care provider | clinic note                                   | gp surgery                    | 45  |
| 31 |   |                     |                                               |                               |     |
| 32 | 1 | other care provider | urgent consultation                           | urgent consultation           | 42  |
| 33 |   |                     |                                               |                               |     |
| 34 | 1 | other care provider | home visit note                               | other                         | 41  |
| 35 |   |                     |                                               |                               |     |
| 36 | 1 | other care provider | laboratory result                             | clinic                        | 40  |
| 37 |   |                     |                                               |                               |     |
| 38 | 1 | gp                  | laboratory result                             | acute visit                   | 39  |
| 39 | 1 | dr                  | home visit note                               | home visit note               | 38  |
| 40 |   |                     |                                               |                               |     |
| 41 | 1 | other care provider | telephone encounter                           | telephone call to a patient   | 38  |
| 42 | 1 | nurse               | telephone encounter                           | telephone consultation        | 33  |
| 43 |   |                     |                                               |                               |     |
| 44 | 1 | other care provider | consultation via sms text message             | awaiting review               | 28  |
| 45 | 1 | gp                  | walk-in clinic                                | walk-in centre                | 27  |
| 46 | 1 | nurse               | walk-in clinic                                | walk-in centre                | 27  |
| 47 |   |                     |                                               |                               |     |
| 48 | 1 | other care provider | walk-in clinic                                | clinic                        | 27  |
| 49 |   |                     |                                               |                               |     |
| 50 | 1 | nurse               | children's home visit note                    | awaiting review               | 25  |
| 51 | 1 | gp                  | gp surgery                                    | main surgery                  | 24  |
| 52 | 1 | nurse               | residential home visit note                   | residential home              | 22  |
| 53 |   |                     |                                               |                               |     |
| 54 | 1 | other care provider | seen in urgent care centre                    | awaiting review               | 22  |
| 55 | 1 | nurse               | night visit note                              | awaiting review               | 20  |
| 56 |   |                     |                                               |                               |     |
| 57 | 1 | other care provider | children's home visit note                    | awaiting review               | 19  |
| 58 |   |                     |                                               |                               |     |
| 59 | 1 | other care provider | consultation via multimedia                   | awaiting review               | 19  |
| 60 |   |                     |                                               |                               |     |

|    |   |            |                                          |                               |      |
|----|---|------------|------------------------------------------|-------------------------------|------|
| 1  |   |            |                                          |                               |      |
| 2  |   |            |                                          |                               |      |
| 3  |   |            |                                          |                               |      |
| 4  | 1 | gp         | home visit note                          | nursing home visit note       | 17   |
| 5  | 1 | gp         | nursing home visit note                  | nursing home                  | 17   |
| 6  | 1 | gp         | residential home visit note              | nursing home                  | 15   |
| 7  |   | other care |                                          |                               |      |
| 8  | 1 | provider   | face to face consultation                | gp surgery                    | 14   |
| 9  |   | other care |                                          |                               |      |
| 10 | 1 | provider   | night visit note                         | awaiting review               | 14   |
| 11 |   | other care |                                          |                               |      |
| 12 | 1 | provider   | other consultation medium used           | other                         | 14   |
| 13 | 1 | nurse      | clinic note                              | gp surgery                    | 13   |
| 14 | 1 | nurse      | walk-in clinic                           | clinic                        | 13   |
| 15 | 1 | nurse      | home visit note                          | acute visit                   | 10   |
| 16 |   |            |                                          |                               |      |
| 17 | 1 | nurse      | consultation via sms text message        | awaiting review               | < 10 |
| 18 |   |            |                                          |                               |      |
| 19 | 1 | nurse      | consultation via telemedicine web camera | awaiting review               | < 10 |
| 20 | 1 | dr         | consultation via video conference        | awaiting review               | < 10 |
| 21 | 1 | dr         | nursing home visit note                  | nursing home visit note       | < 10 |
| 22 |   | other care |                                          |                               |      |
| 23 | 1 | provider   | home visit note                          | nursing home visit note       | < 10 |
| 24 | 1 | dr         | other note                               | other                         | < 10 |
| 25 |   |            |                                          |                               |      |
| 26 | 1 | gp         | telephone encounter                      | telephone call from a patient | < 10 |
| 27 | 1 | gp         | twilight visit note                      | awaiting review               | < 10 |
| 28 |   | other care |                                          |                               |      |
| 29 | 1 | provider   | laboratory result                        | acute visit                   | < 10 |
| 30 | 1 | dr         | face to face consultation                | face to face consultation     | < 10 |
| 31 | 1 | gp         | home visit note                          | follow-up/routine visit       | < 10 |
| 32 | 1 | gp         | other consultation medium used           | casualty attendance           | < 10 |
| 33 |   | other care |                                          |                               |      |
| 34 | 1 | provider   | home visit note                          | residential home visit note   | < 10 |
| 35 |   | other care |                                          |                               |      |
| 36 | 1 | provider   | other note                               | gp surgery                    | < 10 |
| 37 |   |            |                                          |                               |      |
| 38 | 1 | gp         | home visit note                          | awaiting review               | < 10 |
| 39 | 1 | gp         | non-consultation medication data         | awaiting review               | < 10 |
| 40 | 1 | gp         | remote consultation                      | awaiting review               | < 10 |
| 41 | 1 | gp         | third party consultation                 | casualty attendance           | < 10 |
| 42 | 1 | nurse      | home visit note                          | follow-up/routine visit       | < 10 |
| 43 |   |            |                                          |                               |      |
| 44 | 1 | nurse      | telephone encounter                      | telephone call from a patient | < 10 |
| 45 | 1 | nurse      | third party consultation                 | casualty attendance           | < 10 |
| 46 | 1 | dr         | enterprise consultation                  | enterprise consultation       | < 10 |
| 47 | 1 | dr         | telephone call from a patient            | telephone call from a patient | < 10 |
| 48 | 1 | gp         | district nurse visit                     | awaiting review               | < 10 |
| 49 |   |            |                                          |                               |      |
| 50 | 1 | gp         | e-mail received from patient             | acute visit                   | < 10 |
| 51 | 1 | gp         | hospital outpatient report               | casualty attendance           | < 10 |
| 52 | 1 | gp         | joint consultation                       | awaiting review               | < 10 |
| 53 | 1 | gp         | pharmacy consultation                    | awaiting review               | < 10 |
| 54 |   |            |                                          |                               |      |
| 55 | 1 | gp         | telephone call to a patient              | telephone consultation        | < 10 |
| 56 | 1 | nurse      | administration note                      | other                         | < 10 |
| 57 | 1 | nurse      | face to face consultation                | emergency appointment         | < 10 |
| 58 |   | other care |                                          |                               |      |
| 59 | 1 | provider   | consultation via telemedicine web camera | awaiting review               | < 10 |
| 60 |   |            |                                          |                               |      |

|    |               |                     |                                                     |                               |         |
|----|---------------|---------------------|-----------------------------------------------------|-------------------------------|---------|
| 1  |               |                     |                                                     |                               |         |
| 2  |               |                     |                                                     |                               |         |
| 3  |               |                     |                                                     |                               |         |
| 4  | 1             | other care provider | face to face consultation                           | emergency appointment         | < 10    |
| 5  |               |                     |                                                     |                               |         |
| 6  | 1             | other care provider | face to face consultation                           | emergency consultation        | < 10    |
| 7  |               |                     |                                                     |                               |         |
| 8  | 1             | other care provider | home visit note                                     | acute visit                   | < 10    |
| 9  |               |                     |                                                     |                               |         |
| 10 | 1             | other care provider | pharmacy consultation                               | awaiting review               | < 10    |
| 11 |               |                     |                                                     |                               |         |
| 12 | 1             | other care provider | residential home visit note                         | residential home              | < 10    |
| 13 |               |                     |                                                     |                               |         |
| 14 | 1             | other care provider | telephone encounter                                 | telephone consultation        | < 10    |
| 15 | 1             | dr                  | group consultation                                  | awaiting review               | < 10    |
| 16 | 1             | dr                  | home visit note                                     | acute visit                   | < 10    |
| 17 | 1             | gp                  | clinic note                                         | follow-up/routine visit       | < 10    |
| 18 | 1             | gp                  | emergency consultation                              | casualty attendance           | < 10    |
| 19 | 1             | gp                  | home visit note                                     | nursing home                  | < 10    |
| 20 |               |                     |                                                     |                               |         |
| 21 | 1             | nurse               | seen in rapid access clinic at gp surgery           | awaiting review               | < 10    |
| 22 | 1             | nurse               | telephone consultation                              | telephone call from a patient | < 10    |
| 23 | 1             | nurse               | twilight visit note                                 | awaiting review               | < 10    |
| 24 |               |                     |                                                     |                               |         |
| 25 | 1             | other care provider | administration note                                 | other                         | < 10    |
| 26 | 1             | other care provider | children's home visit note                          | clinic                        | < 10    |
| 27 | 1             | other care provider | home visit note                                     | awaiting review               | < 10    |
| 28 | 1             | other care provider | twilight visit note                                 | awaiting review               | < 10    |
| 29 | excl. job cat |                     | gp surgery                                          | gp surgery                    | 875,291 |
| 30 | excl. job cat |                     | other note                                          | other                         | 31,332  |
| 31 | excl. job cat |                     | telephone consultation                              | telephone consultation        | 29,455  |
| 32 | excl. job cat |                     | online communication                                | online services message       | 14,055  |
| 33 | excl. job cat |                     | telephone call to a patient                         | telephone call to a patient   | 13,935  |
| 34 | excl. job cat |                     | provision of general practitioner intermediate care | gp surgery                    | 9,791   |
| 35 | excl. job cat |                     | telephone call from a patient                       | telephone call from a patient | 7,098   |
| 36 | excl. job cat |                     | seen in gp unit                                     | gp surgery                    | 6,240   |
| 37 | excl. job cat |                     | home visit note                                     | home visit note               | 4,776   |
| 38 | excl. job cat |                     | routine consultation                                | other                         | 4,248   |
| 39 | excl. job cat |                     | gp surgery                                          | surgery consultation          | 3,047   |
| 40 | excl. job cat |                     | home visit note                                     | other                         | 2,664   |
| 41 | excl. job cat |                     | face to face consultation                           | face to face consultation     | 2,071   |
| 42 | excl. job cat |                     | face to face consultation                           | surgery consultation          | 1,177   |
| 43 | excl. job cat |                     | online communication                                | awaiting review               | 1,098   |
| 44 | excl. job cat |                     | nursing home visit note                             | nursing home visit note       | 708     |
| 45 | excl. job cat |                     | routine consultation                                | surgery consultation          | 509     |
| 46 | excl. job cat |                     | consultation via video conference                   | awaiting review               | 494     |
| 47 | excl. job cat |                     | routine consultation                                | awaiting review               | 453     |
| 48 | excl. job cat |                     | enterprise consultation                             | enterprise consultation       | 398     |
| 49 | excl. job cat |                     | administration note                                 | other                         | 376     |
| 50 | excl. job cat |                     | telephone encounter                                 | telephone encounter           | 376     |
| 51 |               |                     |                                                     |                               |         |
| 52 |               |                     |                                                     |                               |         |
| 53 |               |                     |                                                     |                               |         |
| 54 |               |                     |                                                     |                               |         |
| 55 |               |                     |                                                     |                               |         |
| 56 |               |                     |                                                     |                               |         |
| 57 |               |                     |                                                     |                               |         |
| 58 |               |                     |                                                     |                               |         |
| 59 |               |                     |                                                     |                               |         |
| 60 |               |                     |                                                     |                               |         |

|    |               |                                               |                               |      |
|----|---------------|-----------------------------------------------|-------------------------------|------|
| 1  |               |                                               |                               |      |
| 2  |               |                                               |                               |      |
| 3  | excl. job cat | home visit note                               | awaiting review               | 371  |
| 4  | excl. job cat | clinic note                                   | clinic                        | 337  |
| 5  | excl. job cat | clinic note                                   | surgery consultation          | 329  |
| 6  | excl. job cat | residential home visit note                   | residential home visit note   | 327  |
| 7  | excl. job cat | face to face consultation                     | gp surgery                    | 305  |
| 8  | excl. job cat | face to face consultation                     | awaiting review               | 293  |
| 9  | excl. job cat | home visit note                               | home visit                    | 250  |
| 10 | excl. job cat | urgent consultation                           | urgent consultation           | 240  |
| 11 | excl. job cat | walk-in clinic                                | walk-in clinic                | 196  |
| 12 | excl. job cat | group consultation                            | awaiting review               | 170  |
| 13 | excl. job cat | seen in gp unit                               | surgery consultation          | 148  |
| 14 | excl. job cat | e-mail consultation                           | awaiting review               | 145  |
| 15 | excl. job cat | emergency consultation                        | emergency consultation        | 121  |
| 16 | excl. job cat | face to face consultation with relative/carer | awaiting review               | 116  |
| 17 | excl. job cat | consultation via multimedia                   | awaiting review               | 75   |
| 18 | excl. job cat | seen in gp unit                               | awaiting review               | 75   |
| 19 | excl. job cat | children's home visit note                    | awaiting review               | 63   |
| 20 | excl. job cat | other note                                    | gp surgery                    | 54   |
| 21 | excl. job cat | other consultation medium used                | other                         | 44   |
| 22 | excl. job cat | other consultation medium used                | awaiting review               | 42   |
| 23 | excl. job cat | extended hours consultation                   | awaiting review               | 37   |
| 24 | excl. job cat | gp surgery                                    | face to face consultation     | 36   |
| 25 | excl. job cat | emergency appointment                         | emergency appointment         | 35   |
| 26 | excl. job cat | gp surgery                                    | clinic                        | 32   |
| 27 | excl. job cat | face to face consultation                     | emergency consultation        | 25   |
| 28 | excl. job cat | residential home visit note                   | residential home              | 23   |
| 29 | excl. job cat | telephone encounter                           | telephone call to a patient   | 23   |
| 30 | excl. job cat | night visit note                              | awaiting review               | 14   |
| 31 | excl. job cat | home visit note                               | acute visit                   | 13   |
| 32 | excl. job cat | walk-in clinic                                | walk-in centre                | 11   |
| 33 | excl. job cat | district nurse visit                          | awaiting review               | < 10 |
| 34 | excl. job cat | seen in urgent care centre                    | awaiting review               | < 10 |
| 35 | excl. job cat | twilight visit note                           | awaiting review               | < 10 |
| 36 | excl. job cat | clinic note                                   | gp surgery                    | < 10 |
| 37 | excl. job cat | laboratory result                             | acute visit                   | < 10 |
| 38 | excl. job cat | telephone consultation                        | telephone call to a patient   | < 10 |
| 39 | excl. job cat | walk-in clinic                                | clinic                        | < 10 |
| 40 | excl. job cat | telephone encounter                           | telephone call from a patient | < 10 |
| 41 | excl. job cat | emergency consultation                        | casualty attendance           | < 10 |
| 42 | excl. job cat | pharmacy consultation                         | awaiting review               | < 10 |
| 43 | excl. job cat | third party consultation                      | casualty attendance           | < 10 |
| 44 | excl. job cat | case conference                               | gp surgery                    | < 10 |
| 45 | excl. job cat | emergency consultation                        | awaiting review               | < 10 |
| 46 | excl. job cat | gp surgery                                    | main surgery                  | < 10 |
| 47 | excl. job cat | home visit note                               | follow-up/routine visit       | < 10 |
| 48 | excl. job cat | non-consultation medication data              | casualty attendance           | < 10 |
| 49 | excl. job cat | nursing home visit note                       | nursing home                  | < 10 |
| 50 |               |                                               |                               |      |
| 51 |               |                                               |                               |      |
| 52 |               |                                               |                               |      |
| 53 |               |                                               |                               |      |
| 54 |               |                                               |                               |      |
| 55 |               |                                               |                               |      |
| 56 |               |                                               |                               |      |
| 57 |               |                                               |                               |      |
| 58 |               |                                               |                               |      |
| 59 |               |                                               |                               |      |
| 60 |               |                                               |                               |      |

|    |               |                     |                                              |                          |           |
|----|---------------|---------------------|----------------------------------------------|--------------------------|-----------|
| 1  |               |                     |                                              |                          |           |
| 2  |               |                     |                                              |                          |           |
| 3  | excl. job cat |                     | remote consultation                          | awaiting review          | < 10      |
| 4  | excl. job cat |                     | same day appointment                         | same day appointment     | < 10      |
| 5  | excl. job cat |                     | school visit note                            | awaiting review          | < 10      |
| 6  | excl. job cat |                     | telephone consultation                       | awaiting review          | < 10      |
| 7  | excl. job cat |                     | telephone encounter                          | telephone consultation   | < 10      |
| 8  | excl. job cat |                     | third party consultation                     | awaiting review          | < 10      |
| 9  | excl. job cat |                     |                                              |                          |           |
| 10 |               |                     |                                              |                          |           |
| 11 | 0             | gp                  | externally entered note                      | externally entered       | 3,467,397 |
| 12 | 0             |                     | scanned document                             | docman                   | 3,183,781 |
| 13 | 0             |                     | administration note                          | administration note      | 968,767   |
| 14 | 0             |                     |                                              |                          | 737,843   |
| 15 | 0             |                     | scanned document                             | scanned document         | 727,269   |
| 16 | 0             | gp                  | administration note                          | administration note      | 725,612   |
| 17 | 0             |                     | inbound document                             | inbound document         | 402,647   |
| 18 |               |                     | awaiting clinical code migration to emis web |                          |           |
| 19 | 0             |                     |                                              | awaiting review          | 385,598   |
| 20 | 0             | nurse               | externally entered note                      | externally entered       | 303,830   |
| 21 |               |                     | awaiting clinical code migration to emis web |                          |           |
| 22 | 0             | gp                  |                                              | awaiting review          | 261,627   |
| 23 | 0             |                     | administration note                          | administration           | 256,604   |
| 24 |               | other care provider |                                              |                          |           |
| 25 | 0             |                     | scanned document                             | docman                   | 255,022   |
| 26 | 0             |                     | externally entered note                      | externally entered       | 252,167   |
| 27 | 0             | gp                  |                                              |                          | 208,462   |
| 28 | 0             | gp                  | outbound referral                            | outbound referral        | 197,534   |
| 29 |               |                     | awaiting clinical code migration to emis web |                          |           |
| 30 | 0             | gp                  |                                              | gp surgery               | 162,048   |
| 31 |               | other care provider |                                              |                          |           |
| 32 | 0             |                     | administration note                          | administration note      | 160,918   |
| 33 |               |                     | awaiting clinical code migration to emis web |                          |           |
| 34 | 0             |                     |                                              | third party consultation | 147,374   |
| 35 | 0             | gp                  | scanned document                             | scanned document         | 145,355   |
| 36 |               |                     | awaiting clinical code migration to emis web |                          |           |
| 37 | 0             |                     |                                              | gp surgery               | 127,041   |
| 38 |               |                     | awaiting clinical code migration to emis web |                          |           |
| 39 | 0             | gp                  |                                              | results recording        | 122,118   |
| 40 |               |                     | awaiting clinical code migration to emis web |                          |           |
| 41 | 0             |                     |                                              | other                    | 121,401   |
| 42 |               |                     | awaiting clinical code migration to emis web |                          |           |
| 43 | 0             | gp                  |                                              | surgery consultation     | 107,304   |
| 44 |               |                     | awaiting clinical code migration to emis web |                          |           |
| 45 | 0             |                     |                                              |                          | 104,693   |
| 46 | 0             | gp                  | inbound document                             | inbound document         | 102,534   |
| 47 |               |                     | awaiting clinical code migration to emis web |                          |           |
| 48 | 0             | nurse               |                                              | awaiting review          | 94,158    |
| 49 |               | other care provider |                                              |                          |           |
| 50 | 0             |                     | awaiting clinical code migration to emis web | gp surgery               | 86,398    |
| 51 |               | other care provider |                                              |                          |           |
| 52 | 0             |                     | awaiting clinical code migration to emis web | awaiting review          | 85,745    |
| 53 |               | nurse               |                                              |                          |           |
| 54 | 0             |                     | administration note                          | administration note      | 84,051    |
| 55 |               |                     | awaiting clinical code migration to emis web |                          |           |
| 56 | 0             | gp                  |                                              |                          | 77,585    |
| 57 |               |                     | awaiting clinical code migration to emis web |                          |           |
| 58 | 0             | nurse               |                                              | gp surgery               | 75,552    |
| 59 |               |                     |                                              |                          |           |

|   |                     |                                              |                                   |        |
|---|---------------------|----------------------------------------------|-----------------------------------|--------|
| 0 | other care provider |                                              |                                   | 66,366 |
| 0 | other care provider | externally entered note                      | externally entered                | 62,810 |
| 0 |                     | externally entered note                      | externally entered note           | 61,848 |
| 0 |                     | awaiting clinical code migration to emis web | repeat issue                      | 61,683 |
| 0 | nurse               |                                              |                                   | 58,019 |
| 0 | gp                  | telephone triage encounter                   | telephone triage encounter        | 50,662 |
| 0 |                     | third party consultation                     | third party consultation          | 44,609 |
| 0 | other care provider | scanned document                             | scanned document                  | 38,341 |
| 0 | nurse               | awaiting clinical code migration to emis web |                                   | 35,376 |
| 0 | nurse               | awaiting clinical code migration to emis web | surgery consultation              | 27,699 |
| 0 | gp                  | administration note                          | administration                    | 27,390 |
| 0 | gp                  | awaiting clinical code migration to emis web | telephone consultation            | 26,214 |
| 0 | gp                  | awaiting clinical code migration to emis web | other                             | 26,204 |
| 0 |                     | awaiting clinical code migration to emis web | scanned document                  | 25,627 |
| 0 |                     | awaiting clinical code migration to emis web | administration note               | 24,458 |
| 0 |                     | gp surgery                                   | awaiting review                   | 24,337 |
| 0 |                     | awaiting clinical code migration to emis web | touchscreen                       | 24,311 |
| 0 | gp                  | third party consultation                     | third party consultation          | 23,952 |
| 0 |                     | awaiting clinical code migration to emis web | patientchase insert               | 22,515 |
| 0 | gp                  | laboratory result                            | results recording                 | 22,066 |
| 0 | gp                  | externally entered note                      | externally entered note           | 20,864 |
| 0 | gp                  | awaiting clinical code migration to emis web | administration note               | 20,729 |
| 0 | other care provider | inbound document                             | inbound document                  | 20,159 |
| 0 | gp                  | telephone call to relative/carers            | telephone call to relative/carers | 19,234 |
| 0 | other care provider | awaiting clinical code migration to emis web |                                   | 17,081 |
| 0 |                     | awaiting clinical code migration to emis web | surgery consultation              | 15,972 |
| 0 | nurse               | awaiting clinical code migration to emis web | clinic                            | 15,892 |
| 0 | gp                  | other note                                   | other note                        | 15,816 |
| 0 | gp                  | gp surgery                                   | awaiting review                   | 15,810 |
| 0 | gp                  | discussion with colleague                    | discussion with colleague         | 12,973 |
| 0 | gp                  | awaiting clinical code migration to emis web | telephone call to a patient       | 11,782 |
| 0 |                     | repeat prescription                          | repeat issue                      | 11,542 |
| 0 | other care provider | administration note                          | administration                    | 11,037 |
| 0 | nurse               | awaiting clinical code migration to emis web | other                             | 11,008 |



|   |                     |                                              |                                    |        |
|---|---------------------|----------------------------------------------|------------------------------------|--------|
| 0 |                     | hospital outpatient report                   | hospital outpatient report         | 10,033 |
| 0 | nurse               | inbound document                             | inbound document                   | 9,304  |
| 0 | nurse               | scanned document                             | scanned document                   | 7,878  |
| 0 | other care provider | awaiting clinical code migration to emis web | repeat issue                       | 7,745  |
| 0 | gp                  | awaiting clinical code migration to emis web | outbound referral                  | 7,402  |
| 0 | other care provider | externally entered note                      | externally entered note            | 6,736  |
| 0 | gp                  | telephone call from relative/carer           | telephone call from relative/carer | 6,626  |
| 0 | other care provider | awaiting clinical code migration to emis web | surgery consultation               | 6,514  |
| 0 |                     | awaiting clinical code migration to emis web | inbound document                   | 6,495  |
| 0 | nurse               | gp surgery                                   | awaiting review                    | 6,475  |
| 0 | other care provider | awaiting clinical code migration to emis web | other                              | 6,315  |
| 0 | nurse               | administration note                          | administration                     | 6,285  |
| 0 |                     | outbound referral                            | outbound referral                  | 6,194  |
| 0 | nurse               | telephone triage encounter                   | telephone triage encounter         | 6,074  |
| 0 | gp                  | clinic note                                  | clinic note                        | 5,834  |
| 0 | gp                  | awaiting clinical code migration to emis web | repeat issue                       | 5,803  |
| 0 | gp                  | non-consultation data                        | non-consultation data              | 5,552  |
| 0 | other care provider | third party consultation                     | third party consultation           | 5,505  |
| 0 | other care provider | gp surgery                                   | awaiting review                    | 5,332  |
| 0 | gp                  | awaiting clinical code migration to emis web | telephone call from a patient      | 5,282  |
| 0 | nurse               | externally entered note                      | externally entered note            | 5,251  |
| 0 | gp                  | face to face consultation                    | triage                             | 5,196  |
| 0 | nurse               | telephone call to relative/carer             | telephone call to relative/carer   | 5,191  |
| 0 |                     | awaiting clinical code migration to emis web | mail to patient                    | 5,178  |
| 0 |                     | non-consultation data                        | non-consultation data              | 4,933  |
| 0 | gp                  | e-mail received from patient                 | e-mail received from patient       | 4,877  |
| 0 | nurse               | outbound referral                            | outbound referral                  | 4,787  |
| 0 |                     | medication requested                         | repeat issue                       | 4,639  |
| 0 | nurse               | third party consultation                     | third party consultation           | 4,605  |
| 0 | nurse               | awaiting clinical code migration to emis web | results recording                  | 4,405  |
| 0 | gp                  | awaiting clinical code migration to emis web | scanned document                   | 4,384  |
| 0 |                     | other note                                   | other note                         | 4,375  |
| 0 |                     | awaiting clinical code migration to emis web | mjog                               | 4,221  |
| 0 | other care provider | other note                                   | other note                         | 4,071  |
| 0 |                     | mail to patient                              | mail to patient                    | 3,924  |
| 0 | other care provider | awaiting clinical code migration to emis web | clinic                             | 3,859  |
| 0 |                     | e-mail received from patient                 | e-mail received from patient       | 3,632  |

|   |                     |                                              |                                    |       |
|---|---------------------|----------------------------------------------|------------------------------------|-------|
| 0 |                     | awaiting clinical code migration to emis web | out of hours, non practice         | 3,607 |
| 0 | other care provider | clinic note                                  | clinic note                        | 3,371 |
| 0 | gp                  | awaiting clinical code migration to emis web | home visit note                    | 3,370 |
| 0 | gp                  | hospital outpatient report                   | hospital outpatient report         | 3,359 |
| 0 | nurse               | nurse telephone triage                       | nurse telephone triage             | 3,274 |
| 0 | nurse               | clinic note                                  | clinic note                        | 3,252 |
| 0 | gp                  | awaiting clinical code migration to emis web | clinic                             | 3,245 |
| 0 | other care provider | awaiting clinical code migration to emis web | administration note                | 3,044 |
| 0 | gp                  | awaiting clinical code migration to emis web | third party consultation           | 3,038 |
| 0 | other care provider | awaiting clinical code migration to emis web | medicine management                | 2,829 |
| 0 | other care provider | telephone call to relative/carer             | telephone call to relative/carer   | 2,807 |
| 0 | nurse               | awaiting clinical code migration to emis web | telephone consultation             | 2,782 |
| 0 |                     | awaiting clinical code migration to emis web | clinic                             | 2,775 |
| 0 |                     | laboratory result                            | laboratory result                  | 2,727 |
| 0 | gp                  | awaiting clinical code migration to emis web | inbound document                   | 2,605 |
| 0 |                     | telephone call from relative/carer           | telephone call from relative/carer | 2,594 |
| 0 |                     | clinic note                                  | clinic note                        | 2,579 |
| 0 | gp                  | laboratory result                            | laboratory result                  | 2,511 |
| 0 | other care provider | repeat prescription                          | repeat issue                       | 2,511 |
| 0 |                     | awaiting clinical code migration to emis web | home of patient                    | 2,454 |
| 0 | gp                  | awaiting clinical code migration to emis web | out of hours, non practice         | 2,365 |
| 0 | gp                  | awaiting clinical code migration to emis web | nhs direct report                  | 2,334 |
| 0 |                     | awaiting clinical code migration to emis web | results recording                  | 2,185 |
| 0 | dr                  | third party consultation                     | third party consultation           | 2,146 |
| 0 | other care provider | awaiting clinical code migration to emis web | third party consultation           | 2,095 |
| 0 | nurse               | awaiting clinical code migration to emis web | administration note                | 2,075 |
| 0 |                     | administration note                          | patientchase insert                | 1,855 |
| 0 |                     | clinic note                                  | awaiting review                    | 1,790 |
| 0 |                     | hospital inpatient report                    | hospital inpatient report          | 1,760 |
| 0 |                     | e-mail received from patient                 | docman                             | 1,753 |
| 0 | nurse               | other note                                   | other note                         | 1,708 |
| 0 | nurse               | non-consultation data                        | non-consultation data              | 1,681 |
| 0 | gp                  | awaiting clinical code migration to emis web | referral letter                    | 1,660 |
| 0 |                     | laboratory result                            | results recording                  | 1,624 |

|   |                     |                                              |                                    |       |
|---|---------------------|----------------------------------------------|------------------------------------|-------|
| 0 |                     | awaiting clinical code migration to emis web | non-consultation data              | 1,537 |
| 0 | gp                  | awaiting clinical code migration to emis web | medicine management                | 1,510 |
| 0 | nurse               | laboratory result                            | results recording                  | 1,464 |
| 0 | nurse               | telephone call from relative/carer           | telephone call from relative/carer | 1,401 |
| 0 |                     | administration note                          | scanned document                   | 1,373 |
| 0 |                     | telephone triage encounter                   | telephone triage encounter         | 1,353 |
| 0 | gp                  | medication requested                         | awaiting review                    | 1,347 |
| 0 | nurse               | discussion with colleague                    | discussion with colleague          | 1,329 |
| 0 | gp                  | awaiting clinical code migration to emis web | telephone triage encounter         | 1,313 |
| 0 | nurse               | awaiting clinical code migration to emis web | telephone call to a patient        | 1,243 |
| 0 | other care provider | non-consultation data                        | non-consultation data              | 1,239 |
| 0 | gp                  | case conference                              | awaiting review                    | 1,225 |
| 0 | gp                  | awaiting clinical code migration to emis web | externally entered note            | 1,206 |
| 0 |                     | telephone call to relative/carer             | telephone call to relative/carer   | 1,191 |
| 0 | nurse               | awaiting clinical code migration to emis web | third party consultation           | 1,170 |
| 0 | gp                  | e-mail sent to patient                       | awaiting review                    | 1,162 |
| 0 | dr                  | administration note                          | administration                     | 1,159 |
| 0 |                     | other note                                   |                                    | 1,156 |
| 0 |                     | administration note                          |                                    | 1,120 |
| 0 | dr                  | externally entered note                      | externally entered                 | 1,113 |
| 0 | gp                  | awaiting clinical code migration to emis web | face to face consultation          | 1,112 |
| 0 | other care provider | telephone triage encounter                   | telephone triage encounter         | 1,107 |
| 0 | nurse               | laboratory result                            | laboratory result                  | 1,064 |
| 0 | other care provider | outbound referral                            | outbound referral                  | 1,052 |
| 0 | gp                  | clinic note                                  | awaiting review                    | 1,030 |
| 0 | other care provider | mail to patient                              | patientchase insert                | 1,019 |
| 0 | gp                  | repeat prescription                          | awaiting review                    | 1,003 |
| 0 | gp                  | awaiting clinical code migration to emis web | data transferred from other system | 983   |
| 0 |                     | awaiting clinical code migration to emis web | non-consultation medication data   | 980   |
| 0 | gp                  | awaiting clinical code migration to emis web | nursing home visit note            | 971   |
| 0 | gp                  | repeat prescription                          | repeat issue                       | 964   |
| 0 |                     | awaiting clinical code migration to emis web | telephone call to a patient        | 901   |
| 0 | dr                  |                                              |                                    | 885   |
| 0 | nurse               | awaiting clinical code migration to emis web | face to face consultation          | 853   |
| 0 | other care provider | hospital outpatient report                   | hospital outpatient report         | 828   |
| 0 |                     | clinic note                                  | community clinic                   | 823   |

|    |   |                     |                                              |                                    |     |
|----|---|---------------------|----------------------------------------------|------------------------------------|-----|
| 1  |   |                     | awaiting clinical code migration to emis web |                                    |     |
| 2  | 0 |                     | awaiting clinical code migration to emis web | gp2gp import                       | 822 |
| 3  |   |                     | awaiting clinical code migration to emis web | letter from outpatients            | 809 |
| 4  | 0 | other care provider | mail to patient                              | mail to patient                    | 801 |
| 5  | 0 | other care provider | telephone call from relative/carer           | telephone call from relative/carer | 789 |
| 6  | 0 |                     | awaiting clinical code migration to emis web | externally entered note            | 769 |
| 7  | 0 |                     | awaiting clinical code migration to emis web | referral letter                    | 751 |
| 8  | 0 | other care provider | awaiting clinical code migration to emis web | inbound document                   | 719 |
| 9  | 0 |                     | e-mail sent to patient                       | awaiting review                    | 711 |
| 10 | 0 | gp                  | hospital inpatient report                    | hospital inpatient report          | 710 |
| 11 | 0 | nurse               | awaiting clinical code migration to emis web | repeat issue                       | 694 |
| 12 | 0 | gp                  | awaiting clinical code migration to emis web | acute visit                        | 693 |
| 13 | 0 | gp                  | awaiting clinical code migration to emis web | telephone call to relative/carer   | 680 |
| 14 | 0 |                     | non-consultation medication data             | repeat issue                       | 679 |
| 15 | 0 | nurse               | awaiting clinical code migration to emis web | home visit note                    | 672 |
| 16 | 0 | other care provider | discussion with colleague                    | discussion with colleague          | 665 |
| 17 | 0 |                     | administration note                          | docman                             | 665 |
| 18 | 0 | gp                  | other note                                   |                                    | 661 |
| 19 | 0 |                     | awaiting clinical code migration to emis web | telephone consultation             | 656 |
| 20 | 0 | other care provider | awaiting clinical code migration to emis web | scanned document                   | 642 |
| 21 | 0 |                     | ooh report                                   | third party consultation           | 637 |
| 22 | 0 | gp                  | scanned document                             | externally entered                 | 619 |
| 23 | 0 | gp                  | medication requested                         | repeat issue                       | 606 |
| 24 | 0 | nurse               | awaiting clinical code migration to emis web | telephone triage encounter         | 602 |
| 25 | 0 | other care provider | awaiting clinical code migration to emis web | telephone call to a patient        | 541 |
| 26 | 0 | other care provider | awaiting clinical code migration to emis web | face to face consultation          | 534 |
| 27 | 0 | dr                  | administration note                          | administration note                | 525 |
| 28 | 0 | gp                  | discussion with other professional           | awaiting review                    | 514 |
| 29 | 0 | gp                  | administration note                          | awaiting review                    | 509 |
| 30 | 0 | other care provider | awaiting clinical code migration to emis web | mail to patient                    | 507 |
| 31 | 0 |                     | ooh report                                   | awaiting review                    | 504 |
| 32 | 0 | dr                  | awaiting clinical code migration to emis web | gp surgery                         | 501 |
| 33 | 0 |                     | walk-in clinic                               |                                    | 495 |
| 34 | 0 |                     | administration note                          | inbound document                   | 493 |
| 35 | 0 |                     | routine consultation                         | repeat issue                       | 488 |

1  
2  
3  
4  
5  
6  
7  
8  
9  
10  
11  
12  
13  
14  
15  
16  
17  
18  
19  
20  
21  
22  
23  
24  
25  
26  
27  
28  
29  
30  
31  
32  
33  
34  
35  
36  
37  
38  
39  
40  
41  
42  
43  
44  
45  
46  
47  
48  
49  
50  
51  
52  
53  
54  
55  
56  
57  
58  
59  
60

|   |                     |                                              |                                    |     |
|---|---------------------|----------------------------------------------|------------------------------------|-----|
|   |                     | awaiting clinical code migration to emis web | telephone call from a patient      | 486 |
| 0 |                     | awaiting clinical code migration to emis web | telephone call from a patient      | 486 |
| 0 | gp                  | ooh report                                   | out of hours, non practice         | 478 |
| 0 | gp                  | mail from patient                            | mail from patient                  | 473 |
| 0 |                     | other note                                   | awaiting review                    | 472 |
| 0 | gp                  | awaiting clinical code migration to emis web | enterprise consultation            | 458 |
| 0 | other care provider | repeat prescription                          | awaiting review                    | 455 |
| 0 | gp                  | awaiting clinical code migration to emis web | discussion with colleague          | 451 |
| 0 |                     | awaiting clinical code migration to emis web | outbound referral                  | 450 |
| 0 | gp                  | awaiting clinical code migration to emis web | nursing home                       | 447 |
| 0 | dr                  | awaiting clinical code migration to emis web | awaiting review                    | 444 |
| 0 | nurse               | e-mail received from patient                 | e-mail received from patient       | 443 |
| 0 |                     | awaiting clinical code migration to emis web | data transferred from other system | 442 |
| 0 | nurse               | ooh report                                   | awaiting review                    | 439 |
| 0 |                     | administration note                          | awaiting review                    | 436 |
| 0 | other care provider | clinic note                                  | awaiting review                    | 431 |
| 0 | gp                  | administration note                          |                                    | 415 |
| 0 | gp                  | administration note                          | scanned document                   | 414 |
| 0 | gp                  | awaiting clinical code migration to emis web | urgent consultation                | 404 |
| 0 | other care provider | awaiting clinical code migration to emis web | externally entered note            | 385 |
| 0 |                     | awaiting clinical code migration to emis web | school                             | 384 |
| 0 | nurse               | hospital outpatient report                   | hospital outpatient report         | 380 |
| 0 |                     | mail to patient                              | patientchase insert                | 377 |
| 0 |                     | awaiting clinical code migration to emis web | telephone encounter                | 376 |
| 0 | gp                  | administration note                          | results recording                  | 372 |
| 0 |                     | discussion with colleague                    | discussion with colleague          | 368 |
| 0 | other care provider | awaiting clinical code migration to emis web | results recording                  | 365 |
| 0 |                     | case conference                              | awaiting review                    | 361 |
| 0 | other care provider | awaiting clinical code migration to emis web | telephone consultation             | 350 |
| 0 | other care provider | awaiting clinical code migration to emis web | patientchase insert                | 345 |
| 0 |                     | sms text message sent to patient             | patientchase insert                | 345 |
| 0 | nurse               | mail to patient                              | mail to patient                    | 342 |
| 0 |                     | awaiting clinical code migration to emis web | hospital outpatient report         | 336 |
| 0 |                     | gp surgery                                   |                                    | 315 |
| 0 | gp                  | ooh report                                   | nhs direct report                  | 314 |
| 0 | gp                  | administration note                          | referral letter                    | 313 |
| 0 | dr                  | awaiting clinical code migration to emis web |                                    | 310 |

|    |   |                     |                                              |                                        |
|----|---|---------------------|----------------------------------------------|----------------------------------------|
| 1  |   |                     |                                              |                                        |
| 2  |   |                     |                                              |                                        |
| 3  |   |                     |                                              |                                        |
| 4  | 0 | gp                  | awaiting clinical code migration to emis web | telephone call from relative/carer 310 |
| 5  |   |                     |                                              |                                        |
| 6  | 0 | gp                  | awaiting clinical code migration to emis web | non-consultation data 309              |
| 7  |   |                     |                                              |                                        |
| 8  | 0 | nurse               | awaiting clinical code migration to emis web | telephone call from a patient 309      |
| 9  |   |                     |                                              |                                        |
| 10 | 0 | other care provider | awaiting clinical code migration to emis web | non-consultation data 306              |
| 11 |   |                     |                                              |                                        |
| 12 | 0 | other care provider | e-mail received from patient                 | e-mail received from patient 292       |
| 13 |   |                     |                                              |                                        |
| 14 | 0 | other care provider | awaiting clinical code migration to emis web | non-consultation medication data 289   |
| 15 |   |                     |                                              |                                        |
| 16 | 0 | nurse               | clinic note                                  | awaiting review 286                    |
| 17 |   |                     |                                              |                                        |
| 18 | 0 | dr                  | scanned document                             | scanned document 285                   |
| 19 |   |                     |                                              |                                        |
| 20 | 0 | other care provider | ooh report                                   | out of hours, non practice 283         |
| 21 |   |                     |                                              |                                        |
| 22 | 0 | other care provider | laboratory result                            | laboratory result 282                  |
| 23 |   |                     |                                              |                                        |
| 24 | 0 | gp                  | awaiting clinical code migration to emis web | discharge details 281                  |
| 25 |   |                     |                                              |                                        |
| 26 | 0 |                     | home visit note                              | home of patient 277                    |
| 27 |   |                     |                                              |                                        |
| 28 | 0 | nurse               | awaiting clinical code migration to emis web | inbound document 276                   |
| 29 |   |                     |                                              |                                        |
| 30 | 0 | other care provider | hospital inpatient report                    | hospital inpatient report 275          |
| 31 |   |                     |                                              |                                        |
| 32 | 0 | gp                  | mail to patient                              | mail to patient 270                    |
| 33 |   |                     |                                              |                                        |
| 34 | 0 | gp                  | awaiting clinical code migration to emis web | residential home visit note 266        |
| 35 |   |                     |                                              |                                        |
| 36 | 0 | other care provider | administration note                          | awaiting review 265                    |
| 37 |   |                     |                                              |                                        |
| 38 | 0 |                     | awaiting clinical code migration to emis web | acute visit 263                        |
| 39 |   |                     |                                              |                                        |
| 40 | 0 |                     | walk-in clinic                               | awaiting review 260                    |
| 41 |   |                     |                                              |                                        |
| 42 | 0 | dr                  | hospital outpatient report                   | hospital outpatient report 256         |
| 43 |   |                     |                                              |                                        |
| 44 | 0 | gp                  | awaiting clinical code migration to emis web | mail to patient 249                    |
| 45 |   |                     |                                              |                                        |
| 46 | 0 |                     | administration note                          | mjog 248                               |
| 47 |   |                     |                                              |                                        |
| 48 | 0 |                     | mail from patient                            | mail from patient 248                  |
| 49 |   |                     |                                              |                                        |
| 50 | 0 | gp                  | awaiting clinical code migration to emis web | letter from outpatients 247            |
| 51 |   |                     |                                              |                                        |
| 52 | 0 |                     | awaiting clinical code migration to emis web | discharge details 244                  |
| 53 |   |                     |                                              |                                        |
| 54 | 0 | nurse               | awaiting clinical code migration to emis web | mail to patient 243                    |
| 55 |   |                     |                                              |                                        |
| 56 | 0 | other care provider | awaiting clinical code migration to emis web | home visit note 236                    |
| 57 |   |                     |                                              |                                        |
| 58 | 0 | gp                  | home visit note                              | results recording 235                  |
| 59 |   |                     |                                              |                                        |
| 60 | 0 | dr                  | inbound document                             | inbound document 234                   |
|    |   |                     |                                              |                                        |
|    | 0 | gp                  | awaiting clinical code migration to emis web | other note 230                         |
|    |   |                     |                                              |                                        |
|    | 0 | gp                  | awaiting clinical code migration to emis web | patientchase insert 229                |
|    |   |                     |                                              |                                        |
|    | 0 | dr                  | awaiting clinical code migration to emis web | administration note 225                |
|    |   |                     |                                              |                                        |
|    | 0 | gp                  | awaiting clinical code migration to emis web | open door surgery 222                  |

|    |   |                     |                                                |                                    |     |
|----|---|---------------------|------------------------------------------------|------------------------------------|-----|
| 1  |   |                     | awaiting clinical code migration to emis web   | nhs direct report                  | 222 |
| 2  |   |                     |                                                |                                    |     |
| 3  |   |                     |                                                |                                    |     |
| 4  | 0 |                     | awaiting clinical code migration to emis web   | nhs direct report                  | 222 |
| 5  |   | other care provider | awaiting clinical code migration to emis web   | touchscreen                        | 216 |
| 6  | 0 |                     | awaiting clinical code migration to emis web   | touchscreen                        | 216 |
| 7  | 0 | gp                  | scanned document                               | docman                             | 213 |
| 8  |   |                     |                                                |                                    |     |
| 9  | 0 | nurse               | awaiting clinical code migration to emis web   | nursing home visit note            | 210 |
| 10 |   |                     |                                                |                                    |     |
| 11 | 0 | nurse               | administration note                            |                                    | 209 |
| 12 |   |                     |                                                |                                    |     |
| 13 | 0 | nurse               | awaiting clinical code migration to emis web   | externally entered note            | 209 |
| 14 |   |                     |                                                |                                    |     |
| 15 | 0 |                     | awaiting clinical code migration to emis web   | laboratory result                  | 199 |
| 16 | 0 |                     | hospital outpatient report                     | hospital                           | 197 |
| 17 |   |                     |                                                |                                    |     |
| 18 | 0 | other care provider | non-consultation medication data               | repeat issue                       | 196 |
| 19 |   |                     |                                                |                                    |     |
| 20 | 0 | other care provider | awaiting clinical code migration to emis web   | referral letter                    | 195 |
| 21 | 0 | nurse               | e-mail sent to patient                         | awaiting review                    | 191 |
| 22 |   |                     |                                                |                                    |     |
| 23 | 0 | nurse               | awaiting clinical code migration to emis web   | referral letter                    | 190 |
| 24 |   |                     |                                                |                                    |     |
| 25 | 0 | dr                  | awaiting clinical code migration to emis web   | telephone consultation             | 186 |
| 26 | 0 | nurse               | case conference                                | awaiting review                    | 185 |
| 27 |   |                     |                                                |                                    |     |
| 28 | 0 | other care provider | awaiting clinical code migration to emis web   | data transferred from other system | 184 |
| 29 |   |                     |                                                |                                    |     |
| 30 | 0 | gp                  | multidisciplinary team meeting without patient | awaiting review                    | 179 |
| 31 |   |                     |                                                |                                    |     |
| 32 | 0 | gp                  | awaiting clinical code migration to emis web   | clinic note                        | 176 |
| 33 |   |                     |                                                |                                    |     |
| 34 | 0 | other care provider | awaiting clinical code migration to emis web   | mjog                               | 175 |
| 35 |   |                     |                                                |                                    |     |
| 36 | 0 |                     | awaiting clinical code migration to emis web   | hospital inpatient report          | 168 |
| 37 |   |                     |                                                |                                    |     |
| 38 | 0 |                     | awaiting clinical code migration to emis web   | home visit note                    | 164 |
| 39 |   |                     |                                                |                                    |     |
| 40 | 0 |                     | awaiting clinical code migration to emis web   | online services message            | 163 |
| 41 |   |                     |                                                |                                    |     |
| 42 | 0 | other care provider | administration note                            |                                    | 162 |
| 43 |   |                     |                                                |                                    |     |
| 44 | 0 | nurse               | awaiting clinical code migration to emis web   | outbound referral                  | 159 |
| 45 |   |                     |                                                |                                    |     |
| 46 | 0 | other care provider | ooh report                                     | awaiting review                    | 156 |
| 47 |   |                     |                                                |                                    |     |
| 48 | 0 | gp                  | awaiting clinical code migration to emis web   | non-consultation medication data   | 152 |
| 49 |   |                     |                                                |                                    |     |
| 50 | 0 | nurse               | awaiting clinical code migration to emis web   | telephone call to relative/carer   | 152 |
| 51 |   |                     |                                                |                                    |     |
| 52 | 0 | other care provider | other note                                     | awaiting review                    | 149 |
| 53 |   |                     |                                                |                                    |     |
| 54 | 0 | dr                  | awaiting clinical code migration to emis web   | surgery consultation               | 148 |
| 55 |   |                     |                                                |                                    |     |
| 56 | 0 | nurse               | awaiting clinical code migration to emis web   | scanned document                   | 146 |
| 57 |   |                     |                                                |                                    |     |
| 58 | 0 | gp                  | administration note                            | repeat issue                       | 145 |
| 59 |   |                     |                                                |                                    |     |
| 60 | 0 |                     | awaiting clinical code migration to emis web   | open door surgery                  | 144 |



|   |                     |                                                     |                                    |     |
|---|---------------------|-----------------------------------------------------|------------------------------------|-----|
| 0 | other care provider | awaiting clinical code migration to emis web        | clinic note                        | 140 |
| 0 |                     | inbound referral                                    | awaiting review                    | 138 |
| 0 |                     | awaiting clinical code migration to emis web        | clinic note                        | 133 |
| 0 |                     | awaiting clinical code migration to emis web        | face to face consultation          | 129 |
| 0 | other care provider | non-consultation medication data                    | non-consultation medication data   | 124 |
| 0 | nurse               | awaiting clinical code migration to emis web        | residential home visit note        | 122 |
| 0 | nurse               | awaiting clinical code migration to emis web        | data transferred from other system | 121 |
| 0 | other care provider | e-mail sent to patient                              | awaiting review                    | 121 |
| 0 | gp                  | administration note                                 | outbound referral                  | 118 |
| 0 | nurse               | other note                                          |                                    | 117 |
| 0 | nurse               | awaiting clinical code migration to emis web        | nurse telephone triage             | 116 |
| 0 |                     | awaiting clinical code migration to emis web        | accident & emergency               | 116 |
| 0 | gp                  | other consultation medium used                      | data transferred from other system | 109 |
| 0 |                     | non-consultation medication data                    | non-consultation medication data   | 108 |
| 0 | nurse               | face to face consultation                           | triage                             | 104 |
| 0 | other care provider | awaiting clinical code migration to emis web        | acute visit                        | 102 |
| 0 | nurse               | awaiting clinical code migration to emis web        | telephone call from relative/carer | 100 |
| 0 |                     | extended hours consultation                         | out of hours, non practice         | 100 |
| 0 | nurse               | mail from patient                                   | mail from patient                  | 98  |
| 0 | other care provider | hospital outpatient report                          | hospital                           | 97  |
| 0 | dr                  | awaiting clinical code migration to emis web        | nursing home visit note            | 96  |
| 0 |                     | nurse telephone triage                              | nurse telephone triage             | 94  |
| 0 | nurse               | hospital inpatient report                           | hospital inpatient report          | 93  |
| 0 | other care provider | case conference                                     | awaiting review                    | 92  |
| 0 | gp                  | provision of general practitioner intermediate care | awaiting review                    | 91  |
| 0 | gp                  | walk-in clinic                                      |                                    | 91  |
| 0 |                     | hospital outpatient report                          | letter from outpatients            | 91  |
| 0 | other care provider | other note                                          |                                    | 89  |
| 0 | gp                  | administration note                                 | other note                         | 87  |
| 0 | other care provider | medication requested                                | awaiting review                    | 85  |
| 0 | dr                  | laboratory result                                   | results recording                  | 84  |
| 0 |                     | awaiting clinical code migration to emis web        | mail from patient                  | 84  |
| 0 |                     | awaiting clinical code migration to emis web        | health centre                      | 80  |
| 0 | gp                  | administration note                                 | inbound document                   | 76  |
| 0 | gp                  | other note                                          | awaiting review                    | 76  |



|    |   |                     |                                              |                                    |    |
|----|---|---------------------|----------------------------------------------|------------------------------------|----|
| 1  |   |                     |                                              |                                    |    |
| 2  |   |                     |                                              |                                    |    |
| 3  | 0 | nurse               | walk-in clinic                               |                                    | 76 |
| 4  | 0 |                     | other note                                   | non-consultation medication data   | 76 |
| 5  |   | other care provider | awaiting clinical code migration to emis web | nhs direct report                  | 73 |
| 6  | 0 |                     | administration note                          | repeat issue                       | 73 |
| 7  | 0 | gp                  | ooh report                                   | awaiting review                    | 70 |
| 8  | 0 | gp                  | weekly care home ward round                  | awaiting review                    | 70 |
| 9  |   |                     | awaiting clinical code migration to emis web | medicine management                | 70 |
| 10 | 0 | other care provider | awaiting clinical code migration to emis web | open door surgery                  | 69 |
| 11 | 0 | other care provider | awaiting clinical code migration to emis web | telephone encounter                | 69 |
| 12 | 0 |                     | medication requested                         | awaiting review                    | 68 |
| 13 | 0 | other care provider | awaiting clinical code migration to emis web | telephone call to relative/carer   | 65 |
| 14 | 0 | dr                  | awaiting clinical code migration to emis web | repeat issue                       | 64 |
| 15 | 0 | gp                  | non-consultation medication data             | repeat issue                       | 64 |
| 16 | 0 | other care provider | awaiting clinical code migration to emis web | telephone call from a patient      | 64 |
| 17 | 0 | gp                  | clinic note                                  | nhs direct report                  | 62 |
| 18 | 0 | gp                  | non-consultation medication data             | medicine management                | 61 |
| 19 | 0 | other care provider | awaiting clinical code migration to emis web | letter from outpatients            | 61 |
| 20 | 0 | gp                  | hospital outpatient report                   | letter from outpatients            | 60 |
| 21 | 0 | gp                  | non-consultation data                        | data transferred from other system | 57 |
| 22 | 0 | nurse               | awaiting clinical code migration to emis web | enterprise consultation            | 57 |
| 23 | 0 | gp                  | outbound referral                            | referral letter                    | 55 |
| 24 | 0 | other care provider | repeat prescription                          | medicine management                | 55 |
| 25 | 0 | nurse               | seen in influenza vaccination clinic         | awaiting review                    | 54 |
| 26 | 0 |                     | administration note                          | results recording                  | 54 |
| 27 |   |                     | awaiting clinical code migration to emis web | telephone call from relative/carer | 54 |
| 28 | 0 | gp                  | awaiting clinical code migration to emis web | hospital outpatient report         | 53 |
| 29 | 0 | gp                  | gp surgery                                   |                                    | 53 |
| 30 | 0 | gp                  | third party consultation                     | out of hours, non practice         | 51 |
| 31 |   |                     | awaiting clinical code migration to emis web | telephone call to relative/carer   | 51 |
| 32 | 0 |                     | clinic note                                  | out of hours, non practice         | 51 |
| 33 | 0 |                     | face to face consultation                    | primary care centre                | 51 |
| 34 | 0 | gp                  | awaiting clinical code migration to emis web | laboratory result                  | 50 |
| 35 | 0 | nurse               | non-consultation medication data             | repeat issue                       | 48 |
| 36 | 0 |                     | awaiting clinical code migration to emis web | other note                         | 48 |
| 37 | 0 |                     | face to face consultation                    | triage                             | 48 |
| 38 | 0 | gp                  | progress report                              | nhs direct report                  | 47 |
| 39 | 0 | other care provider | ooh report                                   | nhs direct report                  | 47 |

|    |   |                     |                                              |                                       |
|----|---|---------------------|----------------------------------------------|---------------------------------------|
| 1  |   |                     |                                              |                                       |
| 2  |   |                     |                                              |                                       |
| 3  |   |                     |                                              |                                       |
| 4  | 0 | nurse               | awaiting clinical code migration to emis web | non-consultation data 46              |
| 5  | 0 |                     | awaiting clinical code migration to emis web | nursing home 46                       |
| 6  | 0 | gp                  | awaiting clinical code migration to emis web | mail from patient 45                  |
| 7  | 0 | nurse               | awaiting clinical code migration to emis web | discussion with colleague 45          |
| 8  | 0 |                     | awaiting clinical code migration to emis web | e-mail received from patient 45       |
| 9  | 0 | nurse               | awaiting clinical code migration to emis web | medicine management 43                |
| 10 | 0 | nurse               | medication requested                         | repeat issue 42                       |
| 11 | 0 | dr                  | mail to patient                              | mail to patient 40                    |
| 12 | 0 | gp                  | awaiting clinical code migration to emis web | encompass message 39                  |
| 13 | 0 | gp                  | other note                                   | data transferred from other system 39 |
| 14 | 0 | nurse               | awaiting clinical code migration to emis web | clinic note 39                        |
| 15 | 0 | nurse               | awaiting clinical code migration to emis web | laboratory result 39                  |
| 16 | 0 | other care provider | awaiting clinical code migration to emis web | other note 39                         |
| 17 | 0 | other care provider | medication requested                         | repeat issue 38                       |
| 18 | 0 | gp                  | administration note                          | non-consultation data 37              |
| 19 | 0 | other care provider | mail from patient                            | mail from patient 37                  |
| 20 | 0 | dr                  | awaiting clinical code migration to emis web | results recording 36                  |
| 21 | 0 | gp                  | awaiting clinical code migration to emis web | e-mail received from patient 36       |
| 22 | 0 | nurse               | awaiting clinical code migration to emis web | walk-in centre 36                     |
| 23 | 0 | other care provider | awaiting clinical code migration to emis web | gp2gp import 36                       |
| 24 | 0 |                     | administration note                          | mail to patient 36                    |
| 25 | 0 | gp                  | awaiting clinical code migration to emis web | home of patient 35                    |
| 26 | 0 | gp                  | awaiting clinical code migration to emis web | casualty attendance 34                |
| 27 | 0 | gp                  | inbound document                             | letter from outpatients 34            |
| 28 | 0 | other care provider | awaiting clinical code migration to emis web | outbound referral 34                  |
| 29 | 0 | other care provider | extended hours consultation                  | out of hours, non practice 34         |
| 30 | 0 | gp                  | awaiting clinical code migration to emis web | telephone encounter 33                |
| 31 | 0 | gp                  | seen in hospital ward                        | awaiting review 33                    |
| 32 | 0 |                     | other note                                   | non-consultation data 33              |
| 33 | 0 | nurse               | other note                                   | awaiting review 32                    |
| 34 | 0 | other care provider | awaiting clinical code migration to emis web | discussion with colleague 32          |
| 35 | 0 |                     | discussion with other professional           | awaiting review 32                    |
| 36 |   |                     |                                              |                                       |
| 37 |   |                     |                                              |                                       |
| 38 |   |                     |                                              |                                       |
| 39 |   |                     |                                              |                                       |
| 40 |   |                     |                                              |                                       |
| 41 |   |                     |                                              |                                       |
| 42 |   |                     |                                              |                                       |
| 43 |   |                     |                                              |                                       |
| 44 |   |                     |                                              |                                       |
| 45 |   |                     |                                              |                                       |
| 46 |   |                     |                                              |                                       |
| 47 |   |                     |                                              |                                       |
| 48 |   |                     |                                              |                                       |
| 49 |   |                     |                                              |                                       |
| 50 |   |                     |                                              |                                       |
| 51 |   |                     |                                              |                                       |
| 52 |   |                     |                                              |                                       |
| 53 |   |                     |                                              |                                       |
| 54 |   |                     |                                              |                                       |
| 55 |   |                     |                                              |                                       |
| 56 |   |                     |                                              |                                       |
| 57 |   |                     |                                              |                                       |
| 58 |   |                     |                                              |                                       |
| 59 |   |                     |                                              |                                       |
| 60 |   |                     |                                              |                                       |

|    |   |            |                                      |                                    |    |
|----|---|------------|--------------------------------------|------------------------------------|----|
| 1  |   |            |                                      |                                    |    |
| 2  |   |            |                                      |                                    |    |
| 3  |   |            | multidisciplinary team meeting       |                                    |    |
| 4  | 0 |            | without patient                      | awaiting review                    | 32 |
| 5  | 0 |            | children's home visit note           |                                    | 31 |
| 6  |   | other care |                                      |                                    |    |
| 7  | 0 | provider   | laboratory result                    | results recording                  | 30 |
| 8  |   |            | awaiting clinical code migration to  |                                    |    |
| 9  | 0 |            | emis web                             | casualty attendance                | 30 |
| 10 |   |            | extended hours consultation          | nhs direct report                  | 30 |
| 11 | 0 | nurse      | administration note                  | awaiting review                    | 29 |
| 12 |   |            | awaiting clinical code migration to  |                                    |    |
| 13 | 0 | nurse      | emis web                             | letter from outpatients            | 29 |
| 14 |   |            | awaiting clinical code migration to  |                                    |    |
| 15 | 0 | nurse      | emis web                             | open door surgery                  | 29 |
| 16 | 0 | nurse      | discussion with other professional   | awaiting review                    | 29 |
| 17 | 0 | nurse      | ooh report                           | out of hours, non practice         | 29 |
| 18 | 0 |            | face to face consultation            | treatment room                     | 29 |
| 19 |   |            | email received from carer            | awaiting review                    | 28 |
| 20 | 0 | gp         |                                      |                                    |    |
| 21 |   | other care | awaiting clinical code migration to  |                                    |    |
| 22 | 0 | provider   | emis web                             | telephone triage encounter         | 28 |
| 23 |   |            | administration note                  | touchscreen                        | 28 |
| 24 | 0 |            | awaiting clinical code migration to  |                                    |    |
| 25 | 0 | nurse      | emis web                             | encompass message                  | 27 |
| 26 |   |            | awaiting clinical code migration to  |                                    |    |
| 27 | 0 | nurse      | emis web                             | nursing home                       | 27 |
| 28 | 0 |            | third party consultation             | out of hours, non practice         | 27 |
| 29 |   |            | awaiting clinical code migration to  |                                    |    |
| 30 | 0 | gp         | emis web                             | follow-up/routine visit            | 26 |
| 31 |   | other care |                                      |                                    |    |
| 32 | 0 | provider   | emergency consultation               | accident & emergency               | 26 |
| 33 |   |            | hospital outpatient report           | nhs direct report                  | 25 |
| 34 | 0 | gp         |                                      |                                    |    |
| 35 |   | other care | awaiting clinical code migration to  |                                    |    |
| 36 | 0 | provider   | emis web                             | telephone call from relative/carer | 23 |
| 37 |   | other care |                                      |                                    |    |
| 38 | 0 | provider   | outbound referral                    | referral letter                    | 23 |
| 39 |   |            | externally entered note              | scanned document                   | 23 |
| 40 |   |            | multidisciplinary team meeting       |                                    |    |
| 41 | 0 | nurse      | without patient                      | awaiting review                    | 22 |
| 42 |   |            | other consultation medium used       | data transferred from other system | 22 |
| 43 | 0 |            | awaiting clinical code migration to  |                                    |    |
| 44 | 0 | dr         | emis web                             | outbound referral                  | 21 |
| 45 |   |            | seen in influenza vaccination clinic | awaiting review                    | 21 |
| 46 |   |            | awaiting clinical code migration to  |                                    |    |
| 47 | 0 | nurse      | emis web                             | other note                         | 21 |
| 48 |   |            | ooh report                           | nhs direct report                  | 21 |
| 49 | 0 |            | awaiting clinical code migration to  |                                    |    |
| 50 | 0 | dr         | emis web                             | inbound document                   | 20 |
| 51 |   |            | awaiting clinical code migration to  |                                    |    |
| 52 | 0 | gp         | emis web                             | day case report                    | 20 |
| 53 |   | other care | seen by general practitioner with    |                                    |    |
| 54 | 0 | provider   | special interest in ear nose and     |                                    |    |
| 55 |   |            | throat disorders                     | data transferred from other system | 20 |
| 56 |   |            | emergency consultation               | accident & emergency               | 20 |
| 57 | 0 |            | awaiting clinical code migration to  |                                    |    |
| 58 | 0 | gp         | emis web                             | online services message            | 19 |
| 59 |   |            |                                      |                                    |    |
| 60 |   |            |                                      |                                    |    |

|    |   |                     |                                                                                     |                                    |    |
|----|---|---------------------|-------------------------------------------------------------------------------------|------------------------------------|----|
| 1  |   |                     |                                                                                     |                                    |    |
| 2  |   |                     |                                                                                     |                                    |    |
| 3  | 0 | gp                  | hospital outpatient report                                                          | third party consultation           | 19 |
| 4  | 0 | nurse               | repeat prescription                                                                 | awaiting review                    | 19 |
| 5  |   |                     | awaiting clinical code migration to emis web                                        |                                    |    |
| 6  | 0 |                     |                                                                                     | walk in centre                     | 19 |
| 7  |   |                     |                                                                                     |                                    |    |
| 8  | 0 | dr                  | hospital inpatient report                                                           | hospital inpatient report          | 18 |
| 9  |   |                     |                                                                                     |                                    |    |
| 10 | 0 | other care provider | awaiting clinical code migration to emis web                                        | residential home visit note        | 18 |
| 11 |   |                     |                                                                                     |                                    |    |
| 12 | 0 | other care provider | walk-in clinic                                                                      |                                    | 18 |
| 13 |   |                     |                                                                                     |                                    |    |
| 14 | 0 |                     | awaiting clinical code migration to emis web                                        | residential home visit note        | 18 |
| 15 |   |                     |                                                                                     |                                    |    |
| 16 | 0 |                     | awaiting clinical code migration to emis web                                        | telephone triage encounter         | 18 |
| 17 |   |                     |                                                                                     |                                    |    |
| 18 | 0 | dr                  | outbound referral                                                                   | outbound referral                  | 17 |
| 19 |   |                     |                                                                                     |                                    |    |
| 20 | 0 | gp                  | ooh report                                                                          | third party consultation           | 17 |
| 21 |   |                     |                                                                                     |                                    |    |
| 22 | 0 | gp                  | other consultation medium used                                                      | nhs direct report                  | 17 |
| 23 |   |                     |                                                                                     |                                    |    |
| 24 | 0 | gp                  | radiology result                                                                    | awaiting review                    | 17 |
| 25 |   |                     |                                                                                     |                                    |    |
| 26 | 0 | gp                  | telephone consultation                                                              | telephone call from relative/carer | 17 |
| 27 |   |                     |                                                                                     |                                    |    |
| 28 | 0 | other care provider | awaiting clinical code migration to emis web                                        | enterprise consultation            | 17 |
| 29 |   |                     |                                                                                     |                                    |    |
| 30 | 0 | other care provider | walk-in clinic                                                                      | walk in centre                     | 17 |
| 31 |   |                     |                                                                                     |                                    |    |
| 32 | 0 |                     | administration note                                                                 | referral letter                    | 17 |
| 33 |   |                     |                                                                                     |                                    |    |
| 34 | 0 | dr                  | other note                                                                          | other note                         | 16 |
| 35 |   |                     |                                                                                     |                                    |    |
| 36 | 0 | other care provider | awaiting clinical code migration to emis web                                        | nursing home visit note            | 16 |
| 37 |   |                     |                                                                                     |                                    |    |
| 38 | 0 | dr                  | medication requested                                                                | repeat issue                       | 15 |
| 39 |   |                     |                                                                                     |                                    |    |
| 40 | 0 | other care provider | administration note                                                                 | inbound document                   | 15 |
| 41 |   |                     |                                                                                     |                                    |    |
| 42 | 0 | other care provider | awaiting clinical code migration to emis web                                        | out of hours, non practice         | 15 |
| 43 |   |                     |                                                                                     |                                    |    |
| 44 | 0 |                     | non-consultation data                                                               | data transferred from other system | 15 |
| 45 |   |                     |                                                                                     |                                    |    |
| 46 | 0 | other care provider | face to face consultation                                                           | triage                             | 15 |
| 47 |   |                     |                                                                                     |                                    |    |
| 48 | 0 | dr                  | awaiting clinical code migration to emis web                                        | telephone call to a patient        | 14 |
| 49 |   |                     |                                                                                     |                                    |    |
| 50 | 0 | dr                  | externally entered note                                                             | externally entered note            | 14 |
| 51 |   |                     |                                                                                     |                                    |    |
| 52 | 0 | gp                  | hospital inpatient report                                                           | discharge details                  | 14 |
| 53 |   |                     |                                                                                     |                                    |    |
| 54 | 0 | gp                  | seen by general practitioner with special interest in ear nose and throat disorders | data transferred from other system | 14 |
| 55 |   |                     |                                                                                     |                                    |    |
| 56 | 0 | other care provider | administration note                                                                 | scanned document                   | 14 |
| 57 |   |                     |                                                                                     |                                    |    |
| 58 | 0 | other care provider | discussion with other professional                                                  | awaiting review                    | 14 |
| 59 |   |                     |                                                                                     |                                    |    |
| 60 | 0 |                     | awaiting clinical code migration to emis web                                        | out of hours, practice             | 14 |
|    |   |                     |                                                                                     |                                    |    |
|    | 0 |                     | externally entered note                                                             |                                    | 14 |
|    |   |                     |                                                                                     |                                    |    |
|    | 0 | dr                  | telephone call to relative/carer                                                    | telephone call to relative/carer   | 13 |
|    |   |                     |                                                                                     |                                    |    |
|    | 0 | nurse               | awaiting clinical code migration to emis web                                        | nhs direct report                  | 13 |
|    |   |                     |                                                                                     |                                    |    |
|    | 0 | nurse               | awaiting clinical code migration to emis web                                        | out of hours, non practice         | 13 |
|    |   |                     |                                                                                     |                                    |    |
|    | 0 |                     | hospital inpatient note                                                             | awaiting review                    | 13 |

|    |   |                     |                                                     |                                    |      |
|----|---|---------------------|-----------------------------------------------------|------------------------------------|------|
| 1  |   |                     |                                                     |                                    |      |
| 2  |   |                     |                                                     |                                    |      |
| 3  | 0 |                     | repeat prescription                                 | awaiting review                    | 13   |
| 4  | 0 | gp                  | other note                                          | encompass message                  | 12   |
| 5  |   |                     | awaiting clinical code migration to emis web        |                                    |      |
| 6  | 0 | nurse               | awaiting clinical code migration to emis web        | hospital outpatient report         | 12   |
| 7  |   |                     | awaiting clinical code migration to emis web        |                                    |      |
| 8  | 0 | other care provider | awaiting clinical code migration to emis web        | accident & emergency               | 12   |
| 9  |   |                     | awaiting clinical code migration to emis web        |                                    |      |
| 10 | 0 | nurse               | other note                                          | encompass message                  | 11   |
| 11 |   |                     | other note                                          | encompass message                  | 11   |
| 12 | 0 | nurse               | repeat prescription                                 | repeat issue                       | 11   |
| 13 |   |                     | repeat prescription                                 | repeat issue                       | 11   |
| 14 | 0 | other care provider | seen in influenza vaccination clinic                | awaiting review                    | 11   |
| 15 |   |                     | seen in influenza vaccination clinic                | awaiting review                    | 11   |
| 16 | 0 |                     | awaiting clinical code migration to emis web        | discussion with colleague          | 11   |
| 17 |   |                     | awaiting clinical code migration to emis web        | discussion with colleague          | 11   |
| 18 | 0 |                     | awaiting clinical code migration to emis web        | hospital outpatient consultation   | 11   |
| 19 |   |                     | awaiting clinical code migration to emis web        | hospital outpatient consultation   | 11   |
| 20 | 0 |                     | awaiting clinical code migration to emis web        | walk-in clinic                     | 11   |
| 21 |   |                     | awaiting clinical code migration to emis web        | walk-in clinic                     | 11   |
| 22 | 0 |                     | non-consultation medication data                    | medicine management                | 11   |
| 23 |   |                     | non-consultation medication data                    | medicine management                | 11   |
| 24 | 0 |                     | provision of general practitioner intermediate care | awaiting review                    | 10   |
| 25 |   |                     | provision of general practitioner intermediate care | awaiting review                    | 10   |
| 26 | 0 | dr                  | clinic note                                         | awaiting review                    | < 10 |
| 27 |   |                     | clinic note                                         | awaiting review                    | < 10 |
| 28 | 0 | other care provider | ooh report                                          | out of hours centre                | < 10 |
| 29 |   |                     | ooh report                                          | out of hours centre                | < 10 |
| 30 | 0 |                     | administration note                                 | non-consultation data              | < 10 |
| 31 |   |                     | administration note                                 | non-consultation data              | < 10 |
| 32 | 0 |                     | clinic note                                         | nhs direct report                  | < 10 |
| 33 |   |                     | clinic note                                         | nhs direct report                  | < 10 |
| 34 | 0 |                     | telephone follow-up                                 | awaiting review                    | < 10 |
| 35 |   |                     | telephone follow-up                                 | awaiting review                    | < 10 |
| 36 | 0 | gp                  | administration note                                 | clinic note                        | < 10 |
| 37 |   |                     | administration note                                 | clinic note                        | < 10 |
| 38 | 0 | gp                  | progress report                                     | awaiting review                    | < 10 |
| 39 |   |                     | progress report                                     | awaiting review                    | < 10 |
| 40 | 0 | nurse               | awaiting clinical code migration to emis web        | acute visit                        | < 10 |
| 41 |   |                     | awaiting clinical code migration to emis web        | acute visit                        | < 10 |
| 42 | 0 | other care provider | multidisciplinary team meeting without patient      | awaiting review                    | < 10 |
| 43 |   |                     | multidisciplinary team meeting without patient      | awaiting review                    | < 10 |
| 44 | 0 |                     | administration note                                 | other note                         | < 10 |
| 45 |   |                     | administration note                                 | other note                         | < 10 |
| 46 | 0 | dr                  | awaiting clinical code migration to emis web        | home visit note                    | < 10 |
| 47 |   |                     | awaiting clinical code migration to emis web        | home visit note                    | < 10 |
| 48 | 0 | gp                  | hospital inpatient note                             | day case report                    | < 10 |
| 49 |   |                     | hospital inpatient note                             | day case report                    | < 10 |
| 50 | 0 | gp                  | inbound document                                    | discharge details                  | < 10 |
| 51 |   |                     | inbound document                                    | discharge details                  | < 10 |
| 52 | 0 | nurse               | awaiting clinical code migration to emis web        | follow-up/routine visit            | < 10 |
| 53 |   |                     | awaiting clinical code migration to emis web        | follow-up/routine visit            | < 10 |
| 54 | 0 | other care provider | awaiting clinical code migration to emis web        | discharge details                  | < 10 |
| 55 |   |                     | awaiting clinical code migration to emis web        | discharge details                  | < 10 |
| 56 | 0 |                     | awaiting clinical code migration to emis web        | enterprise consultation            | < 10 |
| 57 |   |                     | awaiting clinical code migration to emis web        | enterprise consultation            | < 10 |
| 58 | 0 |                     | awaiting clinical code migration to emis web        | nursing home visit note            | < 10 |
| 59 |   |                     | awaiting clinical code migration to emis web        | nursing home visit note            | < 10 |
| 60 | 0 |                     | email received from carer                           | awaiting review                    | < 10 |
| 61 |   |                     | email received from carer                           | awaiting review                    | < 10 |
| 62 | 0 |                     | ooh report                                          | out of hours, practice             | < 10 |
| 63 |   |                     | ooh report                                          | out of hours, practice             | < 10 |
| 64 | 0 |                     | other note                                          | data transferred from other system | < 10 |
| 65 |   |                     | other note                                          | data transferred from other system | < 10 |
| 66 | 0 |                     | outbound referral                                   | referral letter                    | < 10 |
| 67 |   |                     | outbound referral                                   | referral letter                    | < 10 |
| 68 | 0 |                     | radiology result                                    | awaiting review                    | < 10 |
| 69 |   |                     | radiology result                                    | awaiting review                    | < 10 |
| 70 | 0 | dr                  | gp surgery                                          | awaiting review                    | < 10 |
| 71 |   |                     | gp surgery                                          | awaiting review                    | < 10 |
| 72 | 0 | gp                  | routine consultation                                | repeat issue                       | < 10 |
| 73 |   |                     | routine consultation                                | repeat issue                       | < 10 |
| 74 | 0 | nurse               | email received from carer                           | awaiting review                    | < 10 |
| 75 |   |                     | email received from carer                           | awaiting review                    | < 10 |
| 76 | 0 | nurse               | non-consultation data                               | data transferred from other system | < 10 |
| 77 |   |                     | non-consultation data                               | data transferred from other system | < 10 |

|    |   |                     |                                              |                                    |      |
|----|---|---------------------|----------------------------------------------|------------------------------------|------|
| 1  |   |                     |                                              |                                    |      |
| 2  |   |                     |                                              |                                    |      |
| 3  | 0 | nurse               | scanned document                             | docman                             | < 10 |
| 4  |   | other care provider | awaiting clinical code migration to emis web | home of patient                    | < 10 |
| 5  | 0 | other care provider | hospital outpatient report                   | letter from outpatients            | < 10 |
| 6  |   |                     |                                              |                                    |      |
| 7  | 0 | dr                  | discussion with colleague                    | discussion with colleague          | < 10 |
| 8  |   |                     |                                              |                                    |      |
| 9  | 0 | gp                  | administration note                          | discussion with colleague          | < 10 |
| 10 |   |                     |                                              |                                    |      |
| 11 | 0 | gp                  | awaiting clinical code migration to emis web | out of hours, practice             | < 10 |
| 12 |   |                     |                                              |                                    |      |
| 13 | 0 | gp                  | clinic note                                  | out of hours, non practice         | < 10 |
| 14 |   |                     |                                              |                                    |      |
| 15 | 0 | gp                  | ooh report                                   | out of hours, practice             | < 10 |
| 16 |   |                     |                                              |                                    |      |
| 17 | 0 | gp                  | seen in diabetic clinic                      | awaiting review                    | < 10 |
| 18 |   |                     |                                              |                                    |      |
| 19 | 0 | gp                  | sms text message sent to patient             | awaiting review                    | < 10 |
| 20 |   |                     |                                              |                                    |      |
| 21 | 0 | nurse               | administration note                          | discussion with colleague          | < 10 |
| 22 |   | other care provider | awaiting clinical code migration to emis web | nursing home                       | < 10 |
| 23 |   | other care provider | awaiting clinical code migration to emis web | online services message            | < 10 |
| 24 |   |                     | awaiting clinical code migration to emis web | bulk operation                     | < 10 |
| 25 | 0 |                     | non-consultation data                        | touchscreen                        | < 10 |
| 26 |   |                     |                                              |                                    |      |
| 27 | 0 | dr                  | awaiting clinical code migration to emis web | hospital outpatient report         | < 10 |
| 28 |   |                     |                                              |                                    |      |
| 29 | 0 | dr                  | awaiting clinical code migration to emis web | other                              | < 10 |
| 30 |   |                     |                                              |                                    |      |
| 31 | 0 | dr                  | awaiting clinical code migration to emis web | third party consultation           | < 10 |
| 32 |   |                     |                                              |                                    |      |
| 33 | 0 | dr                  | clinic note                                  | clinic note                        | < 10 |
| 34 |   |                     |                                              |                                    |      |
| 35 | 0 | dr                  | non-consultation data                        | non-consultation data              | < 10 |
| 36 |   |                     |                                              |                                    |      |
| 37 | 0 | gp                  | awaiting clinical code migration to emis web | hospital inpatient report          | < 10 |
| 38 |   |                     |                                              |                                    |      |
| 39 | 0 | gp                  | clinic note                                  | community clinic                   | < 10 |
| 40 |   |                     |                                              |                                    |      |
| 41 | 0 | nurse               | administration note                          | non-consultation data              | < 10 |
| 42 |   |                     |                                              |                                    |      |
| 43 | 0 | nurse               | awaiting clinical code migration to emis web | non-consultation medication data   | < 10 |
| 44 |   | other care provider | externally entered note                      | data transferred from other system | < 10 |
| 45 |   | other care provider | gp surgery                                   |                                    | < 10 |
| 46 |   | other care provider | other note                                   | referral letter                    | < 10 |
| 47 |   |                     |                                              |                                    |      |
| 48 | 0 |                     | awaiting clinical code migration to emis web | nurseries/playgroup                | < 10 |
| 49 |   |                     |                                              |                                    |      |
| 50 | 0 |                     | hospital outpatient report                   | third party consultation           | < 10 |
| 51 |   |                     |                                              |                                    |      |
| 52 | 0 | gp                  | nurse telephone triage                       | nurse telephone triage             | < 10 |
| 53 |   |                     |                                              |                                    |      |
| 54 | 0 | dr                  | awaiting clinical code migration to emis web | discussion with colleague          | < 10 |
| 55 |   |                     |                                              |                                    |      |
| 56 | 0 | dr                  | awaiting clinical code migration to emis web | medicine management                | < 10 |
| 57 |   |                     |                                              |                                    |      |
| 58 | 0 | dr                  | awaiting clinical code migration to emis web | residential home visit note        | < 10 |
| 59 |   |                     |                                              |                                    |      |
| 60 | 0 | dr                  | e-mail received from patient                 | e-mail received from patient       | < 10 |
|    |   |                     |                                              |                                    |      |
|    | 0 | dr                  | telephone call from relative/carer           | telephone call from relative/carer | < 10 |

|   |                     |                                              |                                    |      |
|---|---------------------|----------------------------------------------|------------------------------------|------|
| 0 | gp                  | awaiting clinical code migration to emis web | walk-in centre                     | < 10 |
| 0 | gp                  | extended hours consultation                  | out of hours, non practice         | < 10 |
| 0 | gp                  | externally entered note                      |                                    | < 10 |
| 0 | gp                  | other consultation medium used               | other note                         | < 10 |
| 0 | gp                  | telephone consultation                       | telephone call to relative/carer   | < 10 |
| 0 | nurse               | awaiting clinical code migration to emis web | telephone encounter                | < 10 |
| 0 | nurse               | medication requested                         | awaiting review                    | < 10 |
| 0 | nurse               | telephone follow-up                          | awaiting review                    | < 10 |
| 0 | other care provider | awaiting clinical code migration to emis web | e-mail received from patient       | < 10 |
| 0 | other care provider | awaiting clinical code migration to emis web | mail from patient                  | < 10 |
| 0 | other care provider | awaiting clinical code migration to emis web | out of hours, practice             | < 10 |
| 0 | other care provider | other note                                   | data transferred from other system | < 10 |
| 0 |                     | awaiting clinical code migration to emis web | day case report                    | < 10 |
| 0 |                     | awaiting clinical code migration to emis web | encompass message                  | < 10 |
| 0 |                     | e-mail encounter to carer                    | awaiting review                    | < 10 |
| 0 |                     | walk-in clinic                               | walk in centre                     | < 10 |
| 0 | dr                  | awaiting clinical code migration to emis web | non-consultation data              | < 10 |
| 0 | dr                  | awaiting clinical code migration to emis web | other note                         | < 10 |
| 0 | dr                  | e-mail sent to patient                       | awaiting review                    | < 10 |
| 0 | gp                  | email received from third party              | awaiting review                    | < 10 |
| 0 | gp                  | hospital inpatient note                      | awaiting review                    | < 10 |
| 0 | gp                  | night visit note                             | night visit                        | < 10 |
| 0 | gp                  | other note                                   | third party consultation           | < 10 |
| 0 | gp                  | telephone encounter                          | telephone call to relative/carer   | < 10 |
| 0 | gp                  | telephone follow-up                          | awaiting review                    | < 10 |
| 0 | nurse               | administration note                          | referral letter                    | < 10 |
| 0 | nurse               | awaiting clinical code migration to emis web | urgent consultation                | < 10 |
| 0 | nurse               | seen in asthma clinic                        | awaiting review                    | < 10 |
| 0 | nurse               | seen in hospital ward                        | awaiting review                    | < 10 |
| 0 | nurse               | telephone consultation                       | telephone call to relative/carer   | < 10 |
| 0 | other care provider | administration note                          | other note                         | < 10 |
| 0 | other care provider | administration note                          | referral letter                    | < 10 |
| 0 | other care provider | administration note                          | repeat issue                       | < 10 |
| 0 | other care provider | administration note                          | results recording                  | < 10 |
| 0 | other care provider | awaiting clinical code migration to emis web | casualty attendance                | < 10 |
| 0 | other care provider | awaiting clinical code migration to emis web | diabetic clinic                    | < 10 |



|    |   |                     |                                              |                                         |
|----|---|---------------------|----------------------------------------------|-----------------------------------------|
| 1  |   |                     |                                              |                                         |
| 2  |   |                     |                                              |                                         |
| 3  |   |                     |                                              |                                         |
| 4  | 0 | other care provider | awaiting clinical code migration to emis web | encompass message < 10                  |
| 5  |   |                     |                                              |                                         |
| 6  | 0 | other care provider | clinic note                                  | nhs direct report < 10                  |
| 7  |   |                     |                                              |                                         |
| 8  | 0 | other care provider | seen in diabetic clinic                      | awaiting review < 10                    |
| 9  |   |                     |                                              |                                         |
| 10 | 0 |                     | awaiting clinical code migration to emis web | other report < 10                       |
| 11 |   |                     |                                              |                                         |
| 12 | 0 |                     | child in need meeting                        | awaiting review < 10                    |
| 13 |   |                     |                                              |                                         |
| 14 | 0 |                     | hospital inpatient report                    | hospital inpatient < 10                 |
| 15 |   |                     |                                              |                                         |
| 16 | 0 |                     | progress report                              | nhs direct report < 10                  |
| 17 |   |                     |                                              |                                         |
| 18 | 0 |                     | repeat prescription                          | non-consultation medication data < 10   |
| 19 |   |                     |                                              |                                         |
| 20 | 0 |                     | weekly care home ward round                  | awaiting review < 10                    |
| 21 |   |                     |                                              |                                         |
| 22 | 0 | dr                  | awaiting clinical code migration to emis web | non-consultation medication data < 10   |
| 23 |   |                     |                                              |                                         |
| 24 | 0 | dr                  | awaiting clinical code migration to emis web | telephone call from a patient < 10      |
| 25 |   |                     |                                              |                                         |
| 26 | 0 | dr                  | awaiting clinical code migration to emis web | telephone call from relative/carer < 10 |
| 27 |   |                     |                                              |                                         |
| 28 | 0 | dr                  | awaiting clinical code migration to emis web | telephone call to relative/carer < 10   |
| 29 |   |                     |                                              |                                         |
| 30 | 0 | gp                  | awaiting clinical code migration to emis web | night visit , practice < 10             |
| 31 |   |                     |                                              |                                         |
| 32 | 0 | gp                  | awaiting clinical code migration to emis web | walk-in clinic < 10                     |
| 33 |   |                     |                                              |                                         |
| 34 | 0 | gp                  | non-consultation medication data             | non-consultation medication data < 10   |
| 35 |   |                     |                                              |                                         |
| 36 | 0 | gp                  | other consultation medium used               | referral letter < 10                    |
| 37 |   |                     |                                              |                                         |
| 38 | 0 | gp                  | other note                                   | non-consultation data < 10              |
| 39 |   |                     |                                              |                                         |
| 40 | 0 | gp                  | other note                                   | non-consultation medication data < 10   |
| 41 |   |                     |                                              |                                         |
| 42 | 0 | gp                  | seen in baby clinic                          | awaiting review < 10                    |
| 43 |   |                     |                                              |                                         |
| 44 | 0 | gp                  | telephone encounter                          | telephone call from relative/carer < 10 |
| 45 |   |                     |                                              |                                         |
| 46 | 0 | nurse               | administration note                          | clinic note < 10                        |
| 47 |   |                     |                                              |                                         |
| 48 | 0 | nurse               | administration note                          | laboratory result < 10                  |
| 49 |   |                     |                                              |                                         |
| 50 | 0 | nurse               | awaiting clinical code migration to emis web | casualty attendance < 10                |
| 51 |   |                     |                                              |                                         |
| 52 | 0 | nurse               | awaiting clinical code migration to emis web | patientchase insert < 10                |
| 53 |   |                     |                                              |                                         |
| 54 | 0 | nurse               | clinic note                                  | community clinic < 10                   |
| 55 |   |                     |                                              |                                         |
| 56 | 0 | nurse               | extended hours consultation                  | out of hours, non practice < 10         |
| 57 |   |                     |                                              |                                         |
| 58 | 0 | nurse               | externally entered note                      | data transferred from other system < 10 |
| 59 |   |                     |                                              |                                         |
| 60 | 0 | nurse               | first attendance face to face                | awaiting review < 10                    |
|    |   |                     |                                              |                                         |
|    | 0 | nurse               | hospital inpatient note                      | awaiting review < 10                    |
|    |   |                     |                                              |                                         |
|    | 0 | nurse               | ooh report                                   | out of hours, practice < 10             |
|    |   |                     |                                              |                                         |
|    | 0 | nurse               | other consultation medium used               | data transferred from other system < 10 |
|    |   |                     |                                              |                                         |
|    | 0 | nurse               | other note                                   | data transferred from other system < 10 |
|    |   |                     |                                              |                                         |
|    | 0 | nurse               | other note                                   | referral letter < 10                    |
|    |   |                     |                                              |                                         |
|    | 0 | nurse               | outbound referral                            | referral letter < 10                    |
|    |   |                     |                                              |                                         |
|    | 0 | nurse               | patient initiated enc. nos                   | awaiting review < 10                    |
|    |   |                     |                                              |                                         |
|    | 0 | nurse               | telephone consultation                       | telephone call from relative/carer < 10 |
|    |   |                     |                                              |                                         |
|    | 0 | nurse               | telephone encounter                          | telephone call to relative/carer < 10   |
|    |   |                     |                                              |                                         |
|    | 0 | nurse               | weekly care home ward round                  | awaiting review < 10                    |

|    |   |                     |                                                     |                                    |
|----|---|---------------------|-----------------------------------------------------|------------------------------------|
| 1  |   |                     |                                                     |                                    |
| 2  |   |                     |                                                     |                                    |
| 3  |   |                     |                                                     |                                    |
| 4  | 0 | other care provider | administration note                                 | mail to patient                    |
| 5  |   |                     |                                                     |                                    |
| 6  | 0 | other care provider | awaiting clinical code migration to emis web        | hospital inpatient report          |
| 7  |   |                     |                                                     |                                    |
| 8  | 0 | other care provider | awaiting clinical code migration to emis web        | hospital outpatient report         |
| 9  |   |                     |                                                     |                                    |
| 10 | 0 | other care provider | awaiting clinical code migration to emis web        | laboratory result                  |
| 11 |   |                     |                                                     |                                    |
| 12 | 0 | other care provider | clinic note                                         | community clinic                   |
| 13 |   |                     |                                                     |                                    |
| 14 | 0 | other care provider | first attendance face to face                       | awaiting review                    |
| 15 |   |                     |                                                     |                                    |
| 16 | 0 | other care provider | inbound referral                                    | awaiting review                    |
| 17 |   |                     |                                                     |                                    |
| 18 | 0 | other care provider | non-consultation data                               | data transferred from other system |
| 19 |   |                     |                                                     |                                    |
| 20 | 0 | other care provider | ooh report                                          | out of hours, non practice         |
| 21 |   |                     |                                                     |                                    |
| 22 | 0 | other care provider | telephone encounter                                 | awaiting review                    |
| 23 |   |                     |                                                     |                                    |
| 24 | 0 |                     | awaiting clinical code migration to emis web        | follow-up/routine visit            |
| 25 |   |                     |                                                     |                                    |
| 26 | 0 |                     | awaiting clinical code migration to emis web        | letter                             |
| 27 |   |                     |                                                     |                                    |
| 28 | 0 |                     | awaiting clinical code migration to emis web        | minor injuries unit                |
| 29 |   |                     |                                                     |                                    |
| 30 | 0 |                     | awaiting clinical code migration to emis web        | secretary                          |
| 31 |   |                     |                                                     |                                    |
| 32 | 0 |                     | email received from third party                     | awaiting review                    |
| 33 |   |                     |                                                     |                                    |
| 34 | 0 |                     | gp surgery                                          | non-consultation data              |
| 35 |   |                     |                                                     |                                    |
| 36 | 0 |                     | hospital inpatient report                           | awaiting review                    |
| 37 |   |                     |                                                     |                                    |
| 38 | 0 |                     | hospital inpatient report                           | discharge details                  |
| 39 |   |                     |                                                     |                                    |
| 40 | 0 |                     | multidisciplinary team meeting with patient         | awaiting review                    |
| 41 |   |                     |                                                     |                                    |
| 42 | 0 |                     | night visit note                                    | night visit, local rota            |
| 43 |   |                     |                                                     |                                    |
| 44 | 0 |                     | provision of general practitioner intermediate care | gp2gp import                       |
| 45 |   |                     |                                                     |                                    |
| 46 | 0 |                     | telephone triage encounter                          | nhs direct report                  |
| 47 |   |                     |                                                     |                                    |
| 48 | 0 |                     | third party consultation                            | third party                        |
| 49 |   |                     |                                                     |                                    |
| 50 | 0 | other care provider | nurse telephone triage                              | nurse telephone triage             |
| 51 |   |                     |                                                     |                                    |
| 52 |   |                     |                                                     |                                    |
| 53 |   |                     |                                                     |                                    |
| 54 |   |                     |                                                     |                                    |
| 55 |   |                     |                                                     |                                    |
| 56 |   |                     |                                                     |                                    |
| 57 |   |                     |                                                     |                                    |
| 58 |   |                     |                                                     |                                    |
| 59 |   |                     |                                                     |                                    |
| 60 |   |                     |                                                     |                                    |

Annex 3: NHS targets for cancer wait times

|                                    |                                                                                                                                                                                                                                                                                                                                    | Operational standard |     |
|------------------------------------|------------------------------------------------------------------------------------------------------------------------------------------------------------------------------------------------------------------------------------------------------------------------------------------------------------------------------------|----------------------|-----|
| Maximum two weeks from             | Receipt of urgent referral for suspected cancer to first outpatient attendance                                                                                                                                                                                                                                                     | 93%                  |     |
|                                    | Receipt of referral of any patient with breast symptoms (where cancer not suspected) to first hospital assessment                                                                                                                                                                                                                  | 93%                  |     |
| Maximum 28 days from               | Receipt of two week wait referral for suspected cancer, receipt of urgent referral from a cancer screening programme (breast, bowel, cervical), and receipt of two week wait referral of any patient with breast symptoms (where cancer not suspected), to the date the patient is informed of a diagnosis or ruling out of cancer | 75%                  |     |
| Maximum one month (31 days) from:  | Decision to treat to first definitive treatment                                                                                                                                                                                                                                                                                    | 96%                  |     |
|                                    | Decision to treat/earliest clinically appropriate date to start of second or subsequent treatment(s) for all cancer patients including those diagnosed with a recurrence where the subsequent treatment is:                                                                                                                        | surgery              | 94% |
|                                    |                                                                                                                                                                                                                                                                                                                                    | drug treatment       | 98% |
|                                    |                                                                                                                                                                                                                                                                                                                                    | radiotherapy         | 94% |
| Maximum two months (62 days) from: | Urgent referral for suspected cancer to first treatment (62-day classic)                                                                                                                                                                                                                                                           | 85%                  |     |
|                                    | Urgent referral from a NHS Cancer Screening Programme (breast, cervical or bowel) for suspected cancer to first treatment                                                                                                                                                                                                          | 90%                  |     |

Annex 4: Comparing Cancer Wait Times counts for referrals and first treatments with the NCRAS data equity pack

Table A4.1: Comparing Cancer Wait Times counts for referrals and first treatments with the NCRAS data equity pack

| Cancer wait times data | 01 Apr 2020 - 31 Jan 2021       |          |                            |                         |           |                            |
|------------------------|---------------------------------|----------|----------------------------|-------------------------|-----------|----------------------------|
|                        | First treatments for new cancer |          |                            | Urgent cancer referrals |           |                            |
|                        | Observed                        | Expected | Percentage change (95% CI) | Observed                | Expected  | Percentage change (95% CI) |
| All                    | 224,323                         | 267,946  | -16.3% (-16.6, -15.9)      | 1,673,775               | 2,071,967 | -19.2% (-19.3, -19.1)      |
| NCRAS data equity pack |                                 |          |                            |                         |           |                            |
| All                    | 219,410                         | 254,436  | -13.8% (-14.3, -13.3)      | 1,658,309               | 1,984,489 | -16.4% (-16.6, -16.3)      |
| Breast                 | 30,488                          | 40,530   | -24.8% (-25.9, -23.6)      | 337,582                 | 363,139   | -7% (-7.5, -6.6)           |
| Gynaecological         | 11,281                          | 12,344   | -8.6% (-10.9, -6.2)        | 158,723                 | 176,985   | -10.3% (-10.9, -9.7)       |
| Head and Neck          | 8,892                           | 9,901    | -10.2% (-12.7, -7.6)       | 163,668                 | 189,837   | -13.8% (-14.4, -13.2)      |
| Lower GI               | 23,507                          | 27,056   | -13.1% (-14.6, -11.6)      | 302,369                 | 366,677   | -17.5% (-17.9, -17.1)      |
| Lung                   | 24,796                          | 27,409   | -9.5% (-11.1, -8.0)        | 33,830                  | 53,641    | -36.9% (-37.8, -36.1)      |
| Skin                   | 40,977                          | 43,475   | -5.7% (-7.0, -4.5)         | 338,172                 | 429,802   | -21.3% (-21.7, -21.0)      |
| Upper GI               | 17,059                          | 17,586   | -3% (-5.0, -0.9)           | 141,720                 | 163,013   | -13.1% (-13.7, -12.4)      |
| Urological             | 37,970                          | 50,056   | -24.1% (-25.2, -23.1)      | 134,389                 | 184,642   | -27.2% (-27.7, -26.7)      |
| All other              | 24,441                          | 26,080   | -6.3% (-7.9, -4.6)         | 47,856                  | 56,753    | -15.7% (-16.7, -14.6)      |

## Annex 5: Patient demographics and person-time and total numbers of observed activity in CPRD Aurum sample

Table A5.1: Patient demographics in CPRD Aurum sample as at 22 March 2020

|                  | Patient count as at 22 March 2020 |       |
|------------------|-----------------------------------|-------|
|                  | n                                 | %     |
| All              | 375,501                           |       |
| Female           | 187,509                           | 49.9% |
| Male             | 187,992                           | 50.1% |
| Under 11         | 39,611                            | 10.5% |
| 11 to 19         | 43,406                            | 11.6% |
| 20 to 49         | 157,962                           | 42.1% |
| 50 to 69         | 87,482                            | 23.3% |
| 70 and older     | 47,040                            | 12.5% |
| IMD Quintile - 1 | 78,759                            | 21.0% |
| IMD Quintile - 2 | 73,046                            | 19.5% |
| IMD Quintile - 3 | 71,840                            | 19.1% |
| IMD Quintile - 4 | 77,545                            | 20.7% |
| IMD Quintile - 5 | 74,020                            | 19.7% |
| IMD not recorded | 291                               | 0.1%  |

Table A5.2: Person time (weeks) and total primary care activity analysed - CPRD Aurum

|                                     | 3 January 2016 - 21 March 2020* |                       |                | 22 March 2020 - 30 January 2021         |                      |                       |                |                                         |
|-------------------------------------|---------------------------------|-----------------------|----------------|-----------------------------------------|----------------------|-----------------------|----------------|-----------------------------------------|
|                                     | Patient-time (weeks)            | 100,000 person-months | Activity count | Observed rate per 100,000 person-months | Patient-time (weeks) | 100,000 person-months | Activity count | Observed rate per 100,000 person-months |
| Consultations excl flu vaccinations | 78,868,977                      | 181.44                | 6,912,079      | 38,095                                  | 16,701,707           | 38.19                 | 1,306,206      | 34,201                                  |
| Routine Referrals                   | 78,868,977                      | 181.44                | 312,422        | 1,722                                   | 16,701,707           | 38.19                 | 40,744         | 1,067                                   |
| 2 Week Wait Referrals               | 78,868,977                      | 181.44                | 38,905         | 214                                     | 16,701,707           | 38.19                 | 10,235         | 268                                     |

\*The pre-pandemic period consists of 220 weeks or 51.61 months, the post pandemic period is 45 weeks or 10.29 months

Annex 6: Observed vs expected appointment and cancer diagnosis counts from CWT data from 01 Jan 2019 (per person-month)

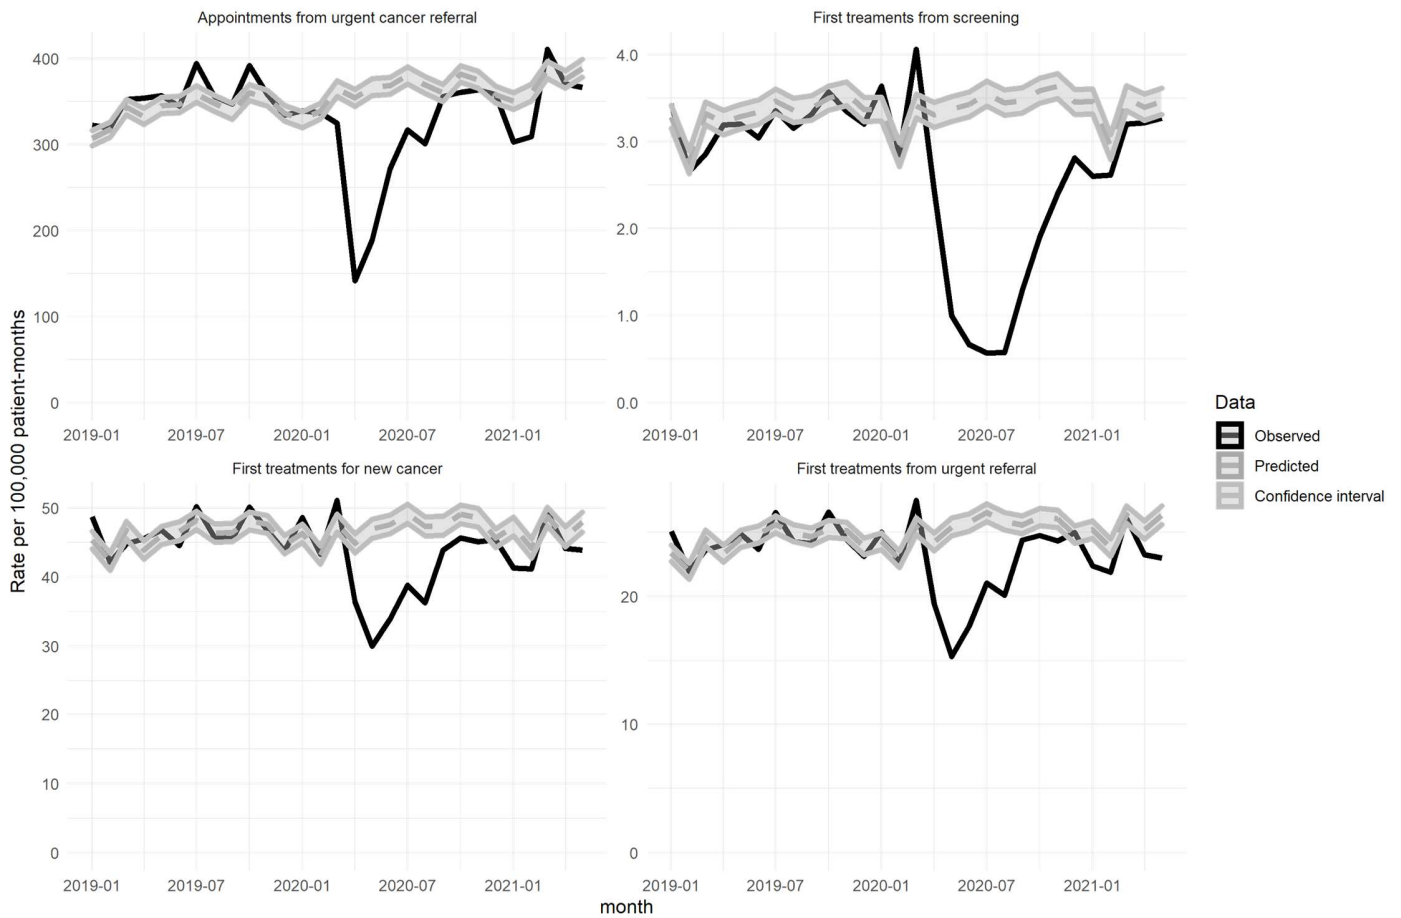

ew only

### Annex 7: Observed vs expected consultations by IMD quintile

Figure A7: Observed vs expected consultations per person per week by IMD quintile, age-standardised (01 Jan 2019 – 30 Jan 2021)

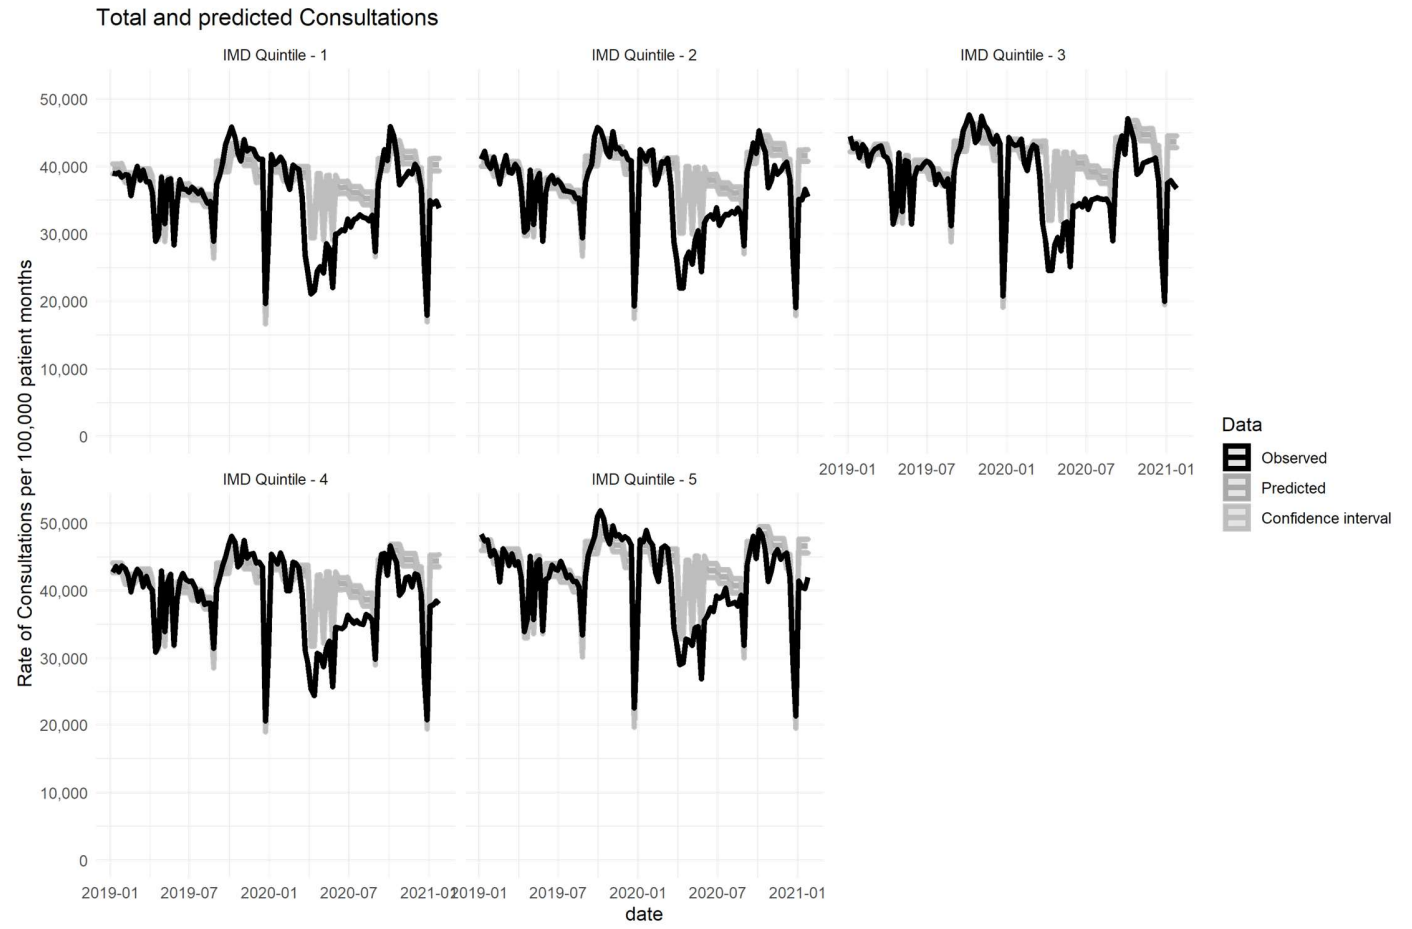

W only

## STROBE Statement—checklist of items that should be included in reports of observational studies

|                              | Item No | Recommendation                                                                                                                                                                                                                                                                                                                                                                                                                                                         | Page No |
|------------------------------|---------|------------------------------------------------------------------------------------------------------------------------------------------------------------------------------------------------------------------------------------------------------------------------------------------------------------------------------------------------------------------------------------------------------------------------------------------------------------------------|---------|
| <b>Title and abstract</b>    | 1       | (a) Indicate the study's design with a commonly used term in the title or the abstract                                                                                                                                                                                                                                                                                                                                                                                 | 2       |
|                              |         | (b) Provide in the abstract an informative and balanced summary of what was done and what was found                                                                                                                                                                                                                                                                                                                                                                    | 2       |
| <b>Introduction</b>          |         |                                                                                                                                                                                                                                                                                                                                                                                                                                                                        |         |
| Background/rationale         | 2       | Explain the scientific background and rationale for the investigation being reported                                                                                                                                                                                                                                                                                                                                                                                   | 3       |
| Objectives                   | 3       | State specific objectives, including any prespecified hypotheses                                                                                                                                                                                                                                                                                                                                                                                                       | 3       |
| <b>Methods</b>               |         |                                                                                                                                                                                                                                                                                                                                                                                                                                                                        |         |
| Study design                 | 4       | Present key elements of study design early in the paper                                                                                                                                                                                                                                                                                                                                                                                                                | 4       |
| Setting                      | 5       | Describe the setting, locations, and relevant dates, including periods of recruitment, exposure, follow-up, and data collection                                                                                                                                                                                                                                                                                                                                        | 4       |
| Participants                 | 6       | (a) <i>Cohort study</i> —Give the eligibility criteria, and the sources and methods of selection of participants. Describe methods of follow-up<br><i>Case-control study</i> —Give the eligibility criteria, and the sources and methods of case ascertainment and control selection. Give the rationale for the choice of cases and controls<br><i>Cross-sectional study</i> —Give the eligibility criteria, and the sources and methods of selection of participants | 4       |
|                              |         | (b) <i>Cohort study</i> —For matched studies, give matching criteria and number of exposed and unexposed<br><i>Case-control study</i> —For matched studies, give matching criteria and the number of controls per case                                                                                                                                                                                                                                                 |         |
| Variables                    | 7       | Clearly define all outcomes, exposures, predictors, potential confounders, and effect modifiers. Give diagnostic criteria, if applicable                                                                                                                                                                                                                                                                                                                               | 4/5     |
| Data sources/<br>measurement | 8*      | For each variable of interest, give sources of data and details of methods of assessment (measurement). Describe comparability of assessment methods if there is more than one group                                                                                                                                                                                                                                                                                   | 4/5     |
| Bias                         | 9       | Describe any efforts to address potential sources of bias                                                                                                                                                                                                                                                                                                                                                                                                              | 5/6     |
| Study size                   | 10      | Explain how the study size was arrived at                                                                                                                                                                                                                                                                                                                                                                                                                              | 4       |
| Quantitative variables       | 11      | Explain how quantitative variables were handled in the analyses. If applicable, describe which groupings were chosen and why                                                                                                                                                                                                                                                                                                                                           | 4-6     |
| Statistical methods          | 12      | (a) Describe all statistical methods, including those used to control for confounding                                                                                                                                                                                                                                                                                                                                                                                  | 5/6     |
|                              |         | (b) Describe any methods used to examine subgroups and interactions                                                                                                                                                                                                                                                                                                                                                                                                    | 5/6     |
|                              |         | (c) Explain how missing data were addressed                                                                                                                                                                                                                                                                                                                                                                                                                            | 4-6     |
|                              |         | (d) <i>Cohort study</i> —If applicable, explain how loss to follow-up was addressed<br><i>Case-control study</i> —If applicable, explain how matching of cases and controls was addressed<br><i>Cross-sectional study</i> —If applicable, describe analytical methods taking account of sampling strategy                                                                                                                                                              | N/A     |
|                              |         | (e) Describe any sensitivity analyses                                                                                                                                                                                                                                                                                                                                                                                                                                  | 4-6     |

Continued on next page



1  
2  
3  
4  
5  
6  
7  
8  
9  
10  
11  
12  
13  
14  
15  
16  
17  
18  
19  
20  
21  
22  
23  
24  
25  
26  
27  
28  
29  
30  
31  
32  
33  
34  
35  
36  
37  
38  
39  
40  
41  
42  
43  
44  
45  
46  
47  
48  
49  
50  
51  
52  
53  
54  
55  
56  
57  
58  
59  
60**Results**

|                  |     |                                                                                                                                                                                                              |     |
|------------------|-----|--------------------------------------------------------------------------------------------------------------------------------------------------------------------------------------------------------------|-----|
| Participants     | 13* | (a) Report numbers of individuals at each stage of study—eg numbers potentially eligible, examined for eligibility, confirmed eligible, included in the study, completing follow-up, and analysed            | 4/5 |
|                  |     | (b) Give reasons for non-participation at each stage                                                                                                                                                         | N/A |
|                  |     | (c) Consider use of a flow diagram                                                                                                                                                                           | N/A |
| Descriptive data | 14* | (a) Give characteristics of study participants (eg demographic, clinical, social) and information on exposures and potential confounders                                                                     | 6-8 |
|                  |     | (b) Indicate number of participants with missing data for each variable of interest                                                                                                                          | 6-8 |
|                  |     | (c) <i>Cohort study</i> —Summarise follow-up time (eg, average and total amount)                                                                                                                             | N/A |
| Outcome data     | 15* | <i>Cohort study</i> —Report numbers of outcome events or summary measures over time                                                                                                                          | 6/7 |
|                  |     | <i>Case-control study</i> —Report numbers in each exposure category, or summary measures of exposure                                                                                                         | N/A |
|                  |     | <i>Cross-sectional study</i> —Report numbers of outcome events or summary measures                                                                                                                           | N/A |
| Main results     | 16  | (a) Give unadjusted estimates and, if applicable, confounder-adjusted estimates and their precision (eg, 95% confidence interval). Make clear which confounders were adjusted for and why they were included | 6-8 |
|                  |     | (b) Report category boundaries when continuous variables were categorized                                                                                                                                    | N/A |
|                  |     | (c) If relevant, consider translating estimates of relative risk into absolute risk for a meaningful time period                                                                                             | N/A |
| Other analyses   | 17  | Report other analyses done—eg analyses of subgroups and interactions, and sensitivity analyses                                                                                                               | 6-8 |

**Discussion**

|                  |    |                                                                                                                                                                            |      |
|------------------|----|----------------------------------------------------------------------------------------------------------------------------------------------------------------------------|------|
| Key results      | 18 | Summarise key results with reference to study objectives                                                                                                                   | 9    |
| Limitations      | 19 | Discuss limitations of the study, taking into account sources of potential bias or imprecision. Discuss both direction and magnitude of any potential bias                 | 9/10 |
| Interpretation   | 20 | Give a cautious overall interpretation of results considering objectives, limitations, multiplicity of analyses, results from similar studies, and other relevant evidence | 10   |
| Generalisability | 21 | Discuss the generalisability (external validity) of the study results                                                                                                      | 9/10 |

**Other information**

|         |    |                                                                                                                                                               |   |
|---------|----|---------------------------------------------------------------------------------------------------------------------------------------------------------------|---|
| Funding | 22 | Give the source of funding and the role of the funders for the present study and, if applicable, for the original study on which the present article is based | 1 |
|---------|----|---------------------------------------------------------------------------------------------------------------------------------------------------------------|---|

\*Give information separately for cases and controls in case-control studies and, if applicable, for exposed and unexposed groups in cohort and cross-sectional studies.

**Note:** An Explanation and Elaboration article discusses each checklist item and gives methodological background and published examples of transparent reporting. The STROBE checklist is best used in conjunction with this article (freely available on the Web sites of PLoS Medicine at <http://www.plosmedicine.org/>, Annals of Internal Medicine at <http://www.annals.org/>, and Epidemiology at <http://www.epidem.com/>). Information on the STROBE Initiative is available at [www.strobe-statement.org](http://www.strobe-statement.org).

# BMJ Open

## Primary Care and Cancer: an analysis of the impact and inequalities of the COVID-19 pandemic on patient pathways

|                                 |                                                                                                                                                                                                                                     |
|---------------------------------|-------------------------------------------------------------------------------------------------------------------------------------------------------------------------------------------------------------------------------------|
| Journal:                        | <i>BMJ Open</i>                                                                                                                                                                                                                     |
| Manuscript ID                   | bmjopen-2021-059374.R2                                                                                                                                                                                                              |
| Article Type:                   | Original research                                                                                                                                                                                                                   |
| Date Submitted by the Author:   | 18-Feb-2022                                                                                                                                                                                                                         |
| Complete List of Authors:       | Watt, Toby; The Health Foundation, REAL Centre<br>Sullivan, Richard; King's College London<br>Aggarwal, Ajay; London School of Hygiene and Tropical Medicine Faculty of Public Health and Policy, Health Services Research & Policy |
| <b>Primary Subject Heading</b>: | Oncology                                                                                                                                                                                                                            |
| Secondary Subject Heading:      | General practice / Family practice                                                                                                                                                                                                  |
| Keywords:                       | ONCOLOGY, PRIMARY CARE, COVID-19                                                                                                                                                                                                    |
|                                 |                                                                                                                                                                                                                                     |

SCHOLARONE™  
Manuscripts



I, the Submitting Author has the right to grant and does grant on behalf of all authors of the Work (as defined in the below author licence), an exclusive licence and/or a non-exclusive licence for contributions from authors who are: i) UK Crown employees; ii) where BMJ has agreed a CC-BY licence shall apply, and/or iii) in accordance with the terms applicable for US Federal Government officers or employees acting as part of their official duties; on a worldwide, perpetual, irrevocable, royalty-free basis to BMJ Publishing Group Ltd ("BMJ") its licensees and where the relevant Journal is co-owned by BMJ to the co-owners of the Journal, to publish the Work in this journal and any other BMJ products and to exploit all rights, as set out in our [licence](#).

The Submitting Author accepts and understands that any supply made under these terms is made by BMJ to the Submitting Author unless you are acting as an employee on behalf of your employer or a postgraduate student of an affiliated institution which is paying any applicable article publishing charge ("APC") for Open Access articles. Where the Submitting Author wishes to make the Work available on an Open Access basis (and intends to pay the relevant APC), the terms of reuse of such Open Access shall be governed by a Creative Commons licence – details of these licences and which [Creative Commons](#) licence will apply to this Work are set out in our licence referred to above.

Other than as permitted in any relevant BMJ Author's Self Archiving Policies, I confirm this Work has not been accepted for publication elsewhere, is not being considered for publication elsewhere and does not duplicate material already published. I confirm all authors consent to publication of this Work and authorise the granting of this licence.

# Primary Care and Cancer: an analysis of the impact and inequalities of the COVID-19 pandemic on patient pathways

Authors: Toby Watt<sup>1,2</sup>, Richard Sullivan<sup>3</sup> and Ajay Aggarwal<sup>4</sup>

1. The Health Foundation, 8 Salisbury Sq., London, UK,

2. Department of Public Health, Environments and Society, London School of Hygiene and Tropical Medicine, 15-17 Tavistock Place, London, UK

3. School of Cancer and Pharmaceutical Sciences, King's College London, London, UK; Institute of Cancer Policy, King's College London, London, UK; Department of

Oncology, Guy's and St Thomas' NHS Foundation Trust, London, UK.

4. Department of Health Services Research and Policy, London School of Hygiene & Tropical Medicine, London, UK; Institute of Cancer Policy, King's College London,

London, UK; Department of Oncology, Guy's and St Thomas' NHS Foundation Trust, London, UK.

Corresponding author: Toby Watt, [toby.watt@health.org.uk](mailto:toby.watt@health.org.uk)

Word count: 4,817

## Abstract

### Objectives

We explore the routes to cancer diagnosis to further understanding of the inequality in the reduction in detection of new cancers since the start of the pandemic. We use different data sets to assess stages in the cancer pathway: primary care data for primary care consultations, routine and urgent referrals and published analysis of cancer registry data for appointments and first treatments.

### Setting

Primary and cancer care

### Participants

In this study we combine multiple data sets to perform a population-based cohort study on different areas of the cancer pathway. For primary care analysis, we use a random sample of 500,000 patients from the Clinical Practice Research Datalink (CPRD). Post-referral we perform a secondary data analysis on the Cancer Wait Times data and the National Cancer Registry Analysis Service (NCRAS) COVID-19 data equity pack.

### Outcome measures:

Primary care: consultation, urgent cancer referral and routine referral rates, then appointments following an urgent cancer referral, and first treatments for new cancer, for all and by quintile of patient's local area Index of Multiple Deprivation.

### Results

Primary care contacts and urgent cancer referrals fell by 12.4% (12.3 to 12.6; 95% CI) and 20.2% (18.1 to 22.3; 95% CI) respectively, while routine referrals have not recovered to pre-pandemic levels. Reductions in first treatments for newly diagnosed cancers are down 16.3% (15.9 to 16.6; 95% CI). The reduction in the number of two week wait referrals and first treatments for all cancer has been largest for those living in poorer areas, despite having a smaller reduction in primary care contact.

### Conclusions

Our results further evidence the strain on primary care and the presence of the inverse care law, and the dire need to address the inequalities so sharply brought into focus by the pandemic. We need to address the disconnect between the importance we place on the role of primary care and the resources we devote to it.

**Key Words:** Oncology, Primary Care, COVID-19

### Strengths and Limitations

- This study draws from multiple data sets along the complex, multidisciplinary cancer pathway.
- We use a rich primary care data set containing patient level primary care activity linked to patients' local area socioeconomic indicator.
- Our primary care patient sample is relatively small (500,000 active patients from January 2016 to January 2021), however the data produces results that closely mirror the rates of consultation and urgent cancer referral per patient produced in publicly available national data sets.

## INTRODUCTION

The COVID-19 pandemic has had a profound impact on UK's health system. Each part of the UK's National Health Service has been impacted in different ways, and we are still feeling many of the consequences of both the COVID-19 pandemic and the public health measures put in place to manage it (non-pharmaceutical interventions; NPI). Cancer is one of the most complicated diseases that the UK health system must manage, being responsible for over one in four UK deaths in 2019. Cancer outcomes are acutely sensitive to changes in social determinants, patient pathways and service provision. Delays in both diagnosis and treatment have significant impacts on patient outcomes(1,2). Pandemic related diagnostic delays, lack of capacity and downstream stage progression (to more advanced disease) are already being seen(3). In addition, the impact of the pandemic needs to be seen in the context of an already overstretched UK cancer care system pre-pandemic that was 'burning hot' even in normal times(4).

Primary care sits at the heart of the cancer patient pathway and is the most crucial interface for early diagnosis and referral to hospital-based care, in addition to their wider support of cancer patient undergoing and post treatment. As models of cancer care have evolved in light of both technical advances and an ageing co-morbid population primary care has become an increasingly important aspect of integrated cancer care and an expansion of General Practitioner (GP) roles in cancer care(5). On average 22.5% of patients diagnosed with cancer are referred to oncology diagnostic services from primary care, but this reflects wide site-specific variation from as little as 8.3% of breast cancer to 42% for bladder cancer(6).

It is important to reflect that prior to the start of the COVID-19 pandemic primary care had seen significant declines in overall resourcing relative to the funding of the rest of the NHS and compared to growing levels of disease burden that is managed in primary care. In addition, there is growing evidence that primary care has been under greater pressure in more deprived areas, with higher levels of staff turnover(7), higher levels of complex multimorbidity(8), higher numbers of consultations(9) and lower levels of funding and fewer GPs per capita once levels of ill health are taken into account(10). These pressures on primary care, and a desire to correct them, have been recognised in the NHS Long Term Plan(11).

Thus, to understand the COVID-19's impact on primary care and the downstream impact on cancer outcomes we need to see that the pandemic arrived when the system that was already struggling to cope. Prior to COVID-19, the central role of primary care as agents of change in reducing inequalities had been the subject of much debate yet could do little in the face of political avoidance of health equity(12). Primary care had become a mirror on inequalities but also subject to significant pressures from these growing inequalities that had put practices in deprived populations under significant stress. Yet despite this, equity-oriented primary care reform in England in the mid-to-late 2000s may have helped to reduce socioeconomic inequality in health(13).

[Box]

COVID-19 was officially declared a pandemic by the WHO on 11 March 2020, and the UK announced its first full lockdown on 23<sup>rd</sup> March. In the following months UK NPI were eased, schools reopened in phases, non-essential shops reopened and in August the population were encouraged to eat out. Some restrictions were re-imposed in September and October, on the 5<sup>th</sup> of November 2020 a second brief national locked lasted until 2<sup>nd</sup> December. On the 6<sup>th</sup> of January a third national lockdown was introduced(14).

[End box]

It is now clear that the UK experience of the pandemic was one of the worst in the world, both in terms of excess mortality (both COVID-19 and non-COVID-19) and the impact of NPI (lockdowns) on both the ability of health services to continue provide care and the impact of messaging (stay at home) on patients' timely presentation for care(15). However, the overwhelming focus of impact studies on cancer care has been on hospital-based services, including diagnostics. Given primary care's central role in pathways to diagnosis and integrated cancer care, including survivorship there has been little insight around how overall changes in consultation rates impacted both routine and two week wait referrals as well as how this varied both in terms of site-specific cancers and as a consequence of socio-economic

inequalities. This study aimed to analyse the socioeconomic inequalities in the impact of NPI measures taken in response to COVID-19 on consultations and routine and urgent cancer referrals in primary care and cancer diagnosis in secondary care.

## METHODS

### Study design, data sources and participants

We perform a population-based cohort study using the following three separate sources.

#### *Primary care data – CPRD Aurum*

Primary care electronic health records were obtained from the Clinical Practice Research Datalink Aurum database (henceforth CPRD). We included patient records from 01 January 2016 to 31 January 2021. Pre-pandemic data were included to establish long-term trends and patterns of seasonality in primary care use and referrals to secondary care. Similar to recent analysis of the COVID-19 pandemic(16), our analysis focusses on comparing observed levels of activity to the expected following the introduction of NPI in England in March 2020.

CPRD contains anonymised patient primary care data from approximately 7% of the UK population and is broadly representative in terms of age, sex, and ethnicity(17). The patient records include information on consultations, patient demographic information, diagnoses, medication prescriptions, and referrals to secondary care.

The period of eligibility for study inclusion, which starts on the latest of the study start date (01/01/2016) or the patient's registration to their practice. A patient's period of eligibility ends on the earliest of leaving their practice, the end of data collection from their practice or their death. Primary care records from CPRD were linked to the deciled index of multiple deprivation (IMD) from 2015<sup>i</sup>(18) of each patient's lower layer super output area (LSOA<sup>ii</sup>). 500,000 patients were randomly sampled from the CPRD population in England who were eligible for linkage within the defined study period.

#### *Cancer wait times data*

Cancer waiting times (CWT) measure performance against the NHS Constitution Standards, recording the number of patients screened, referred to oncology specialists, diagnosed and treated for cancer. These measures are used by local and national organisations to monitor the timely delivery of services to patients, they are published quarterly by NHS Digital<sup>iii</sup>.

#### *Cancer diagnosis by socioeconomic status - NCRAS Cancer equity data*

Data on cancer diagnosis by socioeconomic group was drawn from CADEAS and National Cancer Registry Analysis Service (NCRAS) which have two published data sets(19), presenting the latest national data on:

- i. The number of urgent suspected two-week wait referrals<sup>iv</sup> and,
- ii. First definitive treatments for cancer<sup>v</sup>.

<sup>i</sup> <https://www.gov.uk/government/statistics/english-indices-of-deprivation-2015>

<sup>ii</sup> Geographic areas in England and Wales that are built from groups of contiguous Output Areas and have been automatically generated to be as consistent in population size as possible, and typically contain from four to six Output Areas. The Minimum population is 1000 and the mean is 1500. For more details visit:

[https://datadictionary.nhs.uk/nhs\\_business\\_definitions/lower\\_layer\\_super\\_output\\_area.html#:~:text=Lower%20Layer%20Super%20Output%20Areas,statistics%20in%20England%20and%20Wales.](https://datadictionary.nhs.uk/nhs_business_definitions/lower_layer_super_output_area.html#:~:text=Lower%20Layer%20Super%20Output%20Areas,statistics%20in%20England%20and%20Wales.)

<sup>iii</sup> <https://www.england.nhs.uk/statistics/statistical-work-areas/cancer-waiting-times/>

<sup>iv</sup> <http://www.ncin.org.uk/view?rid=4346> (accessed on 24 January 2022)

<sup>v</sup> <http://www.ncin.org.uk/view?rid=4347> (accessed on 24 January 2022)



1 These data packs are produced based on the CWT data, with analysis from Hospital Episode Statistics (HES) and other  
2 sources outlined in their technical notes (further details in Annex 1).

### 3 **Study Outcomes**

#### 4 Primary care consultations

5 We define consultations in CPRD data by a set of rules developed based on two variables in the consultations file<sup>vi</sup>  
6 (“EMIS® consultation source identifier” and “Consultation source code identifier”)<sup>vii</sup>. In line with the approach taken by  
7 Carey et al 2012 for CPRD Gold data, we use a combination of the consultation code and the category of the record to  
8 identify consultations (details in Annex 2).

9 Using the observation file in CPRD Aurum, we were also able to identify where patients had influenza vaccinations. We  
10 look to exclude flu vaccines from our analysis on the basis that the programme was expanded in 2020/21 to achieve  
11 maximum uptake<sup>viii</sup>. To help with the comparability of consultations in the two periods, we removed primary care  
12 appointments that included a flu vaccine.

#### 13 Referrals from primary care: routine and urgent cancer

14 Referrals in CPRD are categorized into routine and “urgent cancer”. Referrals from the ‘referral file’ are linked to  
15 patients, no additional data cleaning steps were taken in the analysis of referrals.

#### 16 First appointment following an urgent referral

17 The CWT data present monthly counts of patients in England who have been recorded as receiving a first appointment  
18 following an urgent referral from primary care. The CWT data record this because the NHS have a 2-week performance  
19 target (Annex 3).

20 The NCRAS cancer equity data contain monthly counts in England of appointments following an urgent cancer referral  
21 broken down by tumour type and by deprivation according to patient’s place of residence.

#### 22 First treatment following a cancer diagnosis

23 The CWT data present monthly counts of patients in England who have been recorded as receiving a first treatment for a  
24 new cancer diagnosis. The CWT data record this because the NHS have a 31-day performance target (Annex 3).

25 The NCRAS cancer equity data contain monthly counts in England of first treatments for new cancer broken down by  
26 tumour type and by deprivation according to patient’s place of residence.

### 27 **Patient and public involvement**

28 No patients involved

### 29 **Data analysis**

#### 30 CPRD & CWT

31 For both CPRD and CWT we separate the data into two, before and after the introduction of the first NPI.

32  
33  
34  
35  
36  
37  
38  
39  
40  
41  
42  
43  
44  
45  
46  
47  
48  
49  
50  
51  
52  
53  
54  
55 <sup>vi</sup> <https://cprd.com/primary-care>

56 <sup>vii</sup> These variables contain strings that categorise the patient record input and are selected by the staff member completing the  
57 record.

58 <sup>viii</sup> [https://www.england.nhs.uk/wp-content/uploads/2020/05/Letter\\_AnnualFlu\\_2020-21\\_20200805.pdf](https://www.england.nhs.uk/wp-content/uploads/2020/05/Letter_AnnualFlu_2020-21_20200805.pdf)

1 Our analysis of CPRD primary care is conducted weekly and split into two periods before and after the introduction of  
2 NPI on March 23<sup>rd</sup> 2020 (pre-NPI data is from 03 January 2016 to 21 March 2020, our post-NPI onset data is 22 March  
3 2020 to 30 January 2021).

4 CWT data is reported monthly, our pre-NPI data is therefore from 01 October 2009 to 31 March 2020, our post-NPI  
5 onset period is 01 April 2020 to 31 January 2021.

6 We perform a linear regression of consultations, urgent and routine referrals from CPRD data and appointments  
7 following an urgent cancer referral and first treatments from CWT data over time to estimate expected values for the  
8 post-NPI onset period, based on predicted values from the data pre-NPI. To account for seasonality and time trends we  
9 include months as a categorical variable and time as a continuous variable, the approach taken by Carr et al.(16). In the  
10 case of weekly primary care data, we observe large dips in activity in weeks that include bank holidays and include a  
11 categorical variable on the basis of the number of bank holidays in each week (in the winter holidays in England there is  
12 always one week with two bank holidays). Our primary care activity rates are presented per 100,000 patient-months<sup>ix</sup>.  
13 When analysing primary care consultation rates by socioeconomics we adjust for population age. We do so when  
14 calculating the consultation rates by IMD quintile and weighting the sample according to the European Standard  
15 Population<sup>x</sup> (ESP).  
16  
17  
18  
19

#### 20 *NCRAS equity data*

21  
22 The analysis presented in the equity data pack compares new instances of first treatments in months during the  
23 pandemic (01 April 2020 – 31 Jan 2021) compared with the same months in 2019/20. The analysis includes a 95%  
24 confidence interval for the changes, based on rate ratios under an assumption that the population is the same in the  
25 pre-COVID-19 baseline and COVID-19 months. This is calculated using the exact method described in Breslow & Day  
26 1987, pp 93-95(20). The NCRAS equity data pack shows the high levels of heterogeneity in the impact of the COVID-19  
27 pandemic on different tumour locations. The NCRAS data equity pack is different in its count and analysis of “all  
28 tumours” compared with the Cancer Wait Times Data, this is because the data are slightly different (cleaned and  
29 analysed by NCRAS – details in Annex 1). Results of our analysis with each data set are compared in Annex 4. Our  
30 presentation of these data follows the same method but presents the cumulative difference for the period from April  
31 2020 to the end of January compared with the previous 12 months.  
32  
33  
34

## 35 **RESULTS**

### 36 **Overall impact of the pandemic**

37  
38 In the calendar year of 2019, before the COVID-19 pandemic and the associated NPI, there was an average of 39,127  
39 primary care consultations per 100,000 patient-months. This equates to 4.70 attended appointments per registered  
40 patient, or an estimated 266 million appointments in primary care nationally in 2019<sup>xi</sup>.  
41  
42

43 Primary care consultations (Figure 1 a) dropped rapidly to a low of 26,919 consultations per 100,000 patient-months in  
44 the week following 29 March 2020, this was 66.0% lower than the predicted rate. Rates slowly recovered over the next  
45 24 weeks and by 05 September 2020 were up to 99% of the baseline. In total there were an estimated 19.7 million (19.5  
46 to 20.0; 95% CI) fewer primary care consultations in the English NHS during this period. Primary care  
47 consultations again fell to below 90% of predicted levels in the third wave NPI starting on 06 January 2021, by the end of  
48 January 2021 there were a further 6.4 million fewer consultations than expected. Between the start of the first NPI in  
49  
50  
51  
52

---

53  
54 <sup>ix</sup> We adjust the weekly rates per active patient in our sample to 100,000 patient-months: Weekly rate per registered patient in  
55 sample x 100,000 x (52/12)

56 <sup>x</sup> <https://www.causesofdeath.org/docs/standard.pdf>

57 <sup>xi</sup> For comparison the NHS national appointments data recorded 272 million attended appointments in primary care in 2019. Found  
58 here: <https://digital.nhs.uk/data-and-information/publications/statistical/appointments-in-general-practice/march-2021>

March 2020 and the end of January 2021 there were an estimated 26.1 million (25.7 to 26.5; 95% CI) fewer appointments than expected (Table 1a).

In 2019, the average rate of urgent cancer (two week wait) referral was 314 per 100,000 patient-months, equating to an estimated 2.12 million for the NHS in England. Following the first NPI, urgent cancer referrals from primary care (Figure 1 b) fell to a nadir of 86 per 100,000 patient-months by 29 March 2020 (29.7% of the predicted level). Urgent cancer referrals did not return to pre-pandemic baseline until the week following 23 August 2020 equating to 317,000 (280,000 to 356,000; 95% CI) estimated lost urgent cancer referrals over this period. There was a second fall in urgent cancer referrals from primary care in the winter to below 90% of the baseline following the third lockdown (164 referrals per 100,000 patient-months in the week beginning 27 December 2021). This resulted in a further estimated 91,705 fewer urgent cancer referrals than expected. Between the start of the first NPI in March 2020 and the end of January 2021 there were 395,000 (344,000 to 446,000; 95% CI) fewer urgent cancer referrals than expected (Table 1a).

Routine referrals however have shown a different trajectory in that their rates did not recover to pre-pandemic levels (Figure 1 c). As a share of predicted levels routine referrals had the greatest fall, dropping to 16.1% of predicted rates in the week from 19 April 2020. From then to the end of January the closest it came to predicted levels was 80.3% in the week flowing 13 September 2020. For the four weeks in January 2021, it had fallen back down to 60-70% of predicted rates. In 2019 there were an average of 1,801 routine referrals per 100,000 patient-months from primary care, equivalent to an estimated 12.2 million for the NHS in England. Between the start of the first NPI in March 2020 and the end of January 2021 there were 4.33 million (4.21 to 4.46; 95% CI) fewer routine referrals than expected (Table 1a).

Patient demographics and patient-time and total numbers of observed consultations and routine and urgent referrals in our CPRD sample are presented in Annex 5.

*Table 1a: Observed post COVID-19 primary care activity (CPRD Aurum) 22 March 2020 – 30 January 2021*

|                                       | Observed rate | Expected rate | Percentage reduction (95% CI) | Estimated # missing from England population, to 3 significant digits (95% CI) |
|---------------------------------------|---------------|---------------|-------------------------------|-------------------------------------------------------------------------------|
| Event rate per 100,000 patient-months |               |               |                               |                                                                               |
| Consultations                         | 34,201        | 38,684        | 11.6% (11.4, 11.7)            | 26,100,000<br>(25,700,000, 26,500,000)                                        |
| Routine Referrals                     | 1,067         | 1,812         | 41.1% (40.4, 41.8)            | 4,330,000<br>(4,210,000, 4,460,000)                                           |
| 2 Week Wait Referrals                 | 268           | 336           | 20.2% (18.1, 22.3)            | 395,000<br>(344,000, 446,000)                                                 |

*Table 1b: Observed post COVID-19 cancer diagnostic activity (Cancer Wait Times), 01 April 2020 - 31 January 2021*

|                                                                               | Observed rate | Expected rate | Percentage reduction (95% CI) | Estimated # missing from England population, to 3 significant digits (95% CI) |
|-------------------------------------------------------------------------------|---------------|---------------|-------------------------------|-------------------------------------------------------------------------------|
| Event rate per 100,000 patient-months                                         |               |               |                               |                                                                               |
| First consultant appointments following urgent referral from primary care     | 296           | 366           | 19.2% (19.1, 19.3)            | 398,000<br>(395,000, 401,000)                                                 |
| Incidence rate per 100,000 patient-months                                     |               |               |                               |                                                                               |
| First treatments for new cancer from the urgent primary care referral pathway | 21.4          | 25.5          | 16.1% (15.5, 16.8)            | 23,300<br>(22,200, 24,400)                                                    |
| First treatments for new cancer from the national screening pathway           | 1.63          | 3.47          | 53.2% (52, 54.3)              | 10,400<br>(10,000, 10,900)                                                    |
| First treatments for new cancer                                               | 39.7          | 47.4          | 16.3% (15.9, 16.6)            | 43,600<br>(42,500, 44,700)                                                    |

Table 1a summarises the missing appointments and referrals for the post-pandemic period. Since the start of the pandemic in March we have observed consultations rates that are 11.6% (11.4 to 11.7; 95% CI) lower than predicted by previous data. The number of referrals to secondary care per consultation has also fallen, with urgent cancer referrals 20.2% (18.1 to 22.3; 95% CI) and routine referrals 41.1% (40.4 to 41.8; 95% CI) lower than expected.

The knock-on effect of the reductions in patients' primary care appointments and referrals can be observed in the national CWT data. The number of first appointments with a cancer specialist following an urgent cancer referral has fallen by approximately the same amount as estimated for the referrals themselves: 19.2% (19.1 to 19.3; 95% CI). The number of cancer first treatments (following a diagnosis and decision to treat) was 16.3% (15.9 to 16.6; 95% CI) lower than expected, or 43,600 (42,500 to 44,700; 95% CI) missing first treatments from 01 April 2020 - 31 January 2021<sup>xii</sup> (graphs of observed compared with expected are presented in Annex 6).

Urgent cancer referrals by site specific cancer from 01 April 2020 until 31 January 2021 showed significant heterogeneity from moderate reductions in urgent referrals for suspected breast (7.0%; 95% CI 6.6 to 7.5) and gynaecological cancers (10.3%; 95% CI 9.7 to 10.9) and greater reductions for lung (36.9%; 95% CI 36.1 to 37.8) and urological (27.2%; 95% CI 26.7 to 27.7) cancers (Figure 2, further details in Annex 4, Table A4.1). To show how pathway delays interface with reductions in cancer referrals we also examined reductions in first treatments for the same site-specific cancers over this period (Figure 2). Breast and urological cancers observed the greatest reduction in new first treatments: Breast fell by 24.8% (23.6 to 25.9; 95% CI) which equates to 10,000 missing treatments and urological by 24.1% (23.2 to 25.2; 95% CI) which equates to 12,100 missing treatments. Taken together these data reflect substantial delays in both diagnostic and treatment phases of the patient pathway.

### Inequalities in cancer diagnosis outcomes in the pandemic

There are inequalities in primary care use in England, with the people who live in the poorest areas have higher rates of consultation than those in richer areas once we adjust for age. The most deprived quintile was expected to have 43,184 consultations per 100,000 patient-months (Table 2), 15% more than the least deprived.

*Table 2: Observed post COVID-19 primary care activity (CPRD Aurum) by IMD quintile, actual and age-standardised*

|                                                              | 22 Mar 2020 - 30 Jan 2021 (Weekly) |               |                               |
|--------------------------------------------------------------|------------------------------------|---------------|-------------------------------|
|                                                              | Observed rate                      | Expected rate | Percentage reduction (95% CI) |
| Consultations per 100,000 patient-months                     |                                    |               |                               |
| IMD Quintile - 1 (least deprived)                            | 33,813                             | 38,601        | 12.4% (12.1, 12.7)            |
| IMD Quintile - 2                                             | 34,169                             | 38,793        | 11.9% (11.6, 12.3)            |
| IMD Quintile - 3                                             | 35,069                             | 40,127        | 12.6% (12.3, 12.9)            |
| IMD Quintile - 4                                             | 33,494                             | 37,793        | 11.4% (11, 11.7)              |
| IMD Quintile - 5 (most deprived)                             | 34,561                             | 38,212        | 9.6% (9.2, 9.9)               |
| Consultations per 100,000 patient-months (Age-standardised*) |                                    |               |                               |
| IMD Quintile - 1 (least deprived)                            | 32,927                             | 37,636        | 12.5% (12.2, 12.8)            |
| IMD Quintile - 2                                             | 33,916                             | 38,647        | 12.2% (11.9, 12.6)            |
| IMD Quintile - 3                                             | 35,535                             | 40,870        | 13.1% (12.7, 13.4)            |
| IMD Quintile - 4                                             | 36,271                             | 41,148        | 11.9% (11.5, 12.2)            |
| IMD Quintile - 5 (most deprived)                             | 38,997                             | 43,184        | 9.7% (9.4, 10)                |

\*Age-standardisation is performed according to the European Standard Population (ESP)

The reduction of consultations over the period 22 March 2020-30 January 2021 was smallest for those in most deprived areas. Their reduction in consultations for the non-age-standardised figures was 9.6% (9.2 to 9.9), while for the least

<sup>xii</sup> Dates for the CWT and NCRAS analysis do not line up with the CPRD analysis because the latter is conducted weekly, not monthly.

1 deprived the reduction was 12.4% (13.2 to 13.9; 95% CI) (Table 2). Weekly levels of age-standardised consultations per  
2 100,000 patient-months by IMD quintile are presented in Annex 7.

3 Despite a smaller reduction in primary care contacts, we observe the largest reduction in both urgent cancer referrals  
4 and first treatments for cancer for patients living in the most deprived areas. The NCRAS data equity pack presents the  
5 number of urgent cancer referrals and first cancer treatments by IMD quintile<sup>xiii</sup>. Figure 3 shows the reduction in urgent  
6 cancer referrals and first treatments for newly diagnosed cancer by IMD quintile.

7  
8  
9 There was a greater percentage reduction in urgent cancer referrals for those living in the most deprived areas in  
10 England, who experienced a 17.6% (17.2 to 18.0; 95% CI) reduction between 01 April 2020 and 31 January 2021  
11 compared with the same period 12 months before, while referrals for the least deprived quintile fell by proportionately  
12 less: 15.3% (14.9 to 15.6; 95% CI). This equates to a reduction of 61,500 referrals for the most deprived and 62,600 or  
13 the least: without adjusting for age, the most deprived quintile had a smaller proportion of the pre-pandemic urgent  
14 cancer referrals, with 350,000 referrals compared to 410,000 for the least deprived quintile from April 2019 to January  
15 2020.

16  
17  
18 At the same time, rates of new treatment for cancer for the people living in the most deprived 20% of England  
19 experienced a 15.8% (14.6 to 17.0; 95% CI) reduction between 01 April 2020 and 31 January 2021 compared with the  
20 same period 12 months before (6,610 missing first treatments). The reduction for the least deprived was 12.6% (11.5 to  
21 13.7; 95% CI) which equates to 6,880 missing first treatments.

22  
23 Despite having more access to primary care for patients in more deprived areas (9.7% reduction for most deprived  
24 compared to 12.5% for the least deprived), urgent cancer referrals and newly diagnosed cancers have been disrupted by  
25 the pandemic more for people living in poorer areas.

## 26 27 28 **DISCUSSION**

29  
30 The coronavirus SARS-CoV-2 (COVID-19) pandemic has had a profound impact on the management of patients with  
31 cancer(21). The first national lockdown in March 2020 created a ripple of non-pharmaceutical interventions, including  
32 'stay at home' orders, diminished healthcare service provision and redistribution of healthcare to COVID-19 related care  
33 that has had a profound impact on cancer services(1,22).

34  
35 There are also new potential barriers to the pathway that have resulted and may exacerbate these findings. For  
36 example, decreases in health seeking behaviour due to fear of acquiring COVID-19 infection through interactions with  
37 health care settings, increasing use of remote consultations(23), changes in routine referral guidelines(24), as well as  
38 changes in the capacity of acute care. The backlog for routine diagnostic services is a particular concern given that  
39 approximately 40% of cancer are diagnosed through this route(25).

40  
41  
42 Similar issues have also been identified within the health systems of other high-income countries. Primary care providers  
43 in eight European countries experienced similar issues in how to rapidly transform services in the wake to COVID-19(26).  
44 A study in Sweden found an almost identical percentage reduction in primary care consultations (12%) as a results of the  
45 pandemic(27), in Norway there was a 24% reduction in cancer referrals(28), the Netherlands had a 26% reduction in  
46 non-skin cancer diagnoses(29) and in Belgium there was a 44% reduction in diagnosis of invasive tumours in the first  
47 wave of the pandemic(30). Our results don't appear to be unique to England: while different countries can have  
48 different routes to diagnosis(31), many countries also observed disruptions to cancer pathways(32–35).

49  
50  
51 Whilst it was already known that there had been a substantial reduction in the number of overall cancer-related  
52 referrals(36,37) the quantification of this had been missing. Our findings, that primary care consultations in English NHS  
53 fell by 12.4% between January 2020 and January 2021 with urgent cancer referrals even more suppressed (20.2%),  
54 reflect how profound the pathway disruptions were for cancer patients. Furthermore, many cancers are picked up  
55

56  
57  
58 <sup>xiii</sup> They do not age-standardise their results



through the course of routine referrals from general practice for non-specific symptoms. The drop in routine referrals that we found (4.3 million, over this period) will inevitably translate into late-stage presentation and a substantial reduction in outcomes. This will include wider economic costs due to more expensive, late-stage treatment and productivity losses due to morbidity and premature mortality. However, the trajectory of the declines reflect not just changes to national policy in terms of NPI, but also knock-on effects around public behaviour, primary care staffing, downstream reductions in diagnostics and an overall increase in friction across all cancer pathways and systems.

This reduction in cancer pathways through primary care needs to be put in the context of wider disruptions. The suspension of national cancer screening programmes meant that around 2 million people were not screened for cancer through national programs(38,39). Moreover, delays in cancer diagnoses and treatments have consistently been associated with poorer outcomes(1,2). The COVID-19 pandemic has also exacerbated the worst 62-day cancer waiting time targets in the last decade where 1 of 4 patients urgently referred from primary care between April 2020 and January 2021 did not receive treatment within 62 days(37).

In our analysis of urgent cancer referrals by site in relation to reductions seen in first treatments significant differences were seen, which is also reflected in the international evidence. Urological cancers (testis, renal, prostate and urothelial) have been particularly impacted with greater than 25% decrease both in urgent referrals and first treatments. This suggests that outcomes will be particularly impacted in this group. Lung, skin and lower GI (colon and rectal) cancer also experienced significant declines in urgent referrals, in the Netherlands there was a 60% reduction in skin cancer diagnosis during the first wave(29).

Breast cancer was the least impacted of all in terms of urgent referrals but experienced a 25% reduction in first treatments. This highlights how much breast cancer diagnosis relies on screening programmes which have suffered badly as a result of the pandemic, in England(37) and internationally(40). In England, head and neck cancers (HNC) saw a 10.2% (7.6 to 12.7; 95% CI) reduction in diagnosis, while studies in other geographies showed wide differences in the measures impacts of the pandemic on HNC: a study in Ontario, Canada found no evidence of a reduction in head and neck cancer diagnosis following an initial drop in the 6 weeks following lockdown(41), a clinic in Italy had just a 3.7% reduction in HNC(42), a 14% reduction in Belgium(30), a clinic in California showed a 22% reduction(43) and a Cancer Centre in the North of England reported a 33% reduction in HNC cases(44). There is further international evidence of the impact of COVID-19 on interventions down the pathway, with reductions in radical cancer surgeries in two major cancer hubs in England and Italy(45).

Differences in systems, populations and NPI from the pandemic present high levels of complexity in tackling the recovery at both a national and local level. Although it is possible that, in many countries, some cancer patients have already been 'lost' to the system i.e. died of COVID-19 or other non-COVID-19 comorbidities, a significant number will now present with later stage disease, creating further pressure on acute cancer care.

Our findings also reflect socioeconomic inequalities, with more profound decrease in urgent cancer referrals and first treatments for the most deprived populations despite relatively better preservation of consultation rates. This is unexpected and extremely worrying, indicating greater disruption to the diagnostic pathway for patients living in more deprived areas, whose cancer outcomes were typically worse than their less deprived counterparts pre-pandemic(46,47). Resilience in primary care is key for the cancer diagnosis pathway and must be developed. We know that there are challenges associated with resourcing health services in poorer areas (the inverse care law(48)), resulting in fewer resources per head of sick patient(10) and shorter consultation times(49). Further research should focus on understanding to what extent complex morbidity, which is greater in poorer areas(8,50), contributes to the disruption of the cancer diagnostic pathway. Greater understanding would help health systems better prepare for the kind of disruption we have seen as a result of COVID-19.

## Limitations

This study uses multiple data sets to analyse a complex and disjointed pathway. We include a primary care data set that uses a relatively small (500,000) patient sample. However, the CPRD data produces results that closely mirror the rates

1 of consultation per patient (and their reduction) produced in NHS Digital's appointments data(51). In addition, the  
2 estimated reduction in urgent cancer referrals is close to those presented in the NCRAS's analysis of their cancer registry  
3 data (Table 1a & Table 1b). It is not yet possible to link these data on a patient basis due to delays in data access and  
4 once possible further research would be illuminating.

## 6 **Conclusions**

7 Our data reflects a disruption to a complex interaction of several systemic issues that place a great deal of impetus on  
8 the role of primary care in ensuring early diagnosis of cancer. Primary care was already under strain pre-pandemic, with  
9 low levels of investment and workforce deficits(52). Particularly in areas of high deprivation, general practice is under-  
10 funded and under staffed relative to need(7,8,10).

13 Early cancer diagnosis requires concordance of each participant and mechanism - including patients' awareness and  
14 ability to present with cancer symptoms, the ability of GPs to detect and urgently refer possible cancer cases and  
15 sufficient diagnostic capacity (in terms of both workforce and equipment) to enable swift referrals and minimise delays  
16 to diagnosis and treatment. Every one of these nodes on the pathway to early diagnosis has been affected by the  
17 pandemic and the national policy response. However, further work is required as there is currently little understanding  
18 and even less evidence about how much each disruption is ultimately impacting cancer pathways.

21 The impact of the pandemic on cancer diagnosis and time to treatment shown here is very serious. However, what is  
22 more concerning is the unequal and inequitable impact on those worst off. Cancer as a disease area "*magnifies what we*  
23 *know to be true about the totality of the health care system. It exposes all its strengths and weaknesses*"(53). Our results  
24 further evidence the strain on primary care, the presence of the inverse care law(48), and the dire need to address the  
25 inequalities so sharply brought into focus by the pandemic. We need to address the disconnect between the importance  
26 we place on the role of primary care in cancer care and the resources we devote to it.

**Figure legends:**

Figure 1: Observed vs expected primary care activity, 01 Jan 2019 – 30 January 2021 (per 100,000 patient-months) (CPRD Aurum data) Panels: a. Consultations, b. Urgent cancer (2 week wait) referrals from primary care, c. Routine referrals from primary care

Figure 2: Percentage difference between observed and expected first treatments for new cancer and urgent cancer referrals by tumour location from NCRAS Cancer equity data pack (%), 01 Apr 2020 to 31 Jan 2021)

Figure 3: Percentage difference between observed and expected urgent cancer referrals and first treatments for cancer by IMD quintile (01 Apr 2020 – 31 Jan 2021)

**Contributors:** TW, RS and AA designed the study. Data acquisition, cleaning and analysis was conducted by TW on the Health Foundation's secure data environment. TW wrote the manuscript in the first instance. TW, RS and AA interpreted the data and substantially reviewed the draft manuscript. All authors approved the final version of the manuscript. TW and RS are the guarantors. The corresponding author attests that all listed authors meet authorship criteria and that no others meeting the criteria have been omitted.

**Competing interests:** None

**Funding:** This publication is funded through the UK Research and Innovation GCRF grant ES/P010962/1.

**Ethics approval:** CPRD collect data for research use. We did not require ethical approval however, scientific approval for this study was given by the CPRD Independent Scientific Advisory Committee (ISAC). The study was approved by the Independent Scientific Advisory Committee for CPRD research ([20 143](#)). No additional ethics approval was required for this study.

**Data Availability statement:**

**The primary care activity data may be obtained from a third party and are not publicly available.** We used de-identified primary care data from the Clinical Practice Research Datalink (CPRD). For more information please visit: <https://www.cprd.com/Data-access>, enquiries can be emailed to [enquiries@cpd.gov.uk](mailto:enquiries@cpd.gov.uk). Scientific approval for this study was given by the CPRD Independent Scientific Advisory Committee (ISAC). The study was approved by the Independent Scientific Advisory Committee for CPRD research ([20 143](#)). The data is provided by patients and collected by the NHS as part of their care and support.

**Other data sources are available in a public, open access repository:** Cancer Wait Times at <https://www.england.nhs.uk/statistics/statistical-work-areas/cancer-waiting-times/> and the NCRAS Cancer data equity pack is available at [http://www.ncin.org.uk/local\\_cancer\\_intelligence/cadeas](http://www.ncin.org.uk/local_cancer_intelligence/cadeas).



## References

1. Maringe C, Spicer J, Morris M, Purushotham A, Nolte E, Sullivan R, et al. The impact of the COVID-19 pandemic on cancer deaths due to delays in diagnosis in England, UK: a national, population-based, modelling study. *Lancet Oncol.* 2020;21(8).
2. Hanna TP, King WD, Thibodeau S, Jalink M, Paulin GA, Harvey-Jones E, et al. Mortality due to cancer treatment delay: systematic review and meta-analysis. *BMJ.* 2020;371.
3. Purushotham A, Roberts G, Haire K, Dodkins J, Harvey-Jones E, Han L, et al. The impact of national non-pharmaceutical interventions ('lockdowns') on the presentation of cancer patients. *Ecancermedalscience.* 2021;15.
4. Health at a Glance: Europe 2020 [Internet]. OECD; 2020 [cited 2021 Oct 14]. (Health at a Glance: Europe). Available from: [https://www.oecd-ilibrary.org/social-issues-migration-health/health-at-a-glance-europe-2020\\_82129230-en](https://www.oecd-ilibrary.org/social-issues-migration-health/health-at-a-glance-europe-2020_82129230-en)
5. Meiklejohn JA, Mimery A, Martin JH, Bailie R, Garvey G, Walpole ET, et al. The role of the GP in follow-up cancer care: a systematic literature review. Vol. 10, *Journal of Cancer Survivorship.* 2016.
6. PHE. Routes to Diagnosis [Internet]. National Cancer Registration and Analysis Service. [cited 2021 Oct 14]. Available from: [http://www.ncin.org.uk/publications/routes\\_to\\_diagnosis](http://www.ncin.org.uk/publications/routes_to_diagnosis)
7. Parisi R, Lau YS, Bower P, Checkland K, Rubery J, Sutton M, et al. Rates of turnover among general practitioners: A retrospective study of all English general practices between 2007 and 2019. Vol. 11, *BMJ Open.* 2021.
8. Head A, Fleming K, Kypridemos C, Schofield P, Pearson-Stuttard J, O'Flaherty M. Inequalities in incident and prevalent multimorbidity in England, 2004–19: a population-based, descriptive study. *Lancet Heal Longev.* 2021;2(8).
9. DHSC, ONS. Direct and Indirect health impacts of COVID-19 in England [Internet]. London; 2021 Sep [cited 2021 Oct 14]. Available from: [https://assets.publishing.service.gov.uk/government/uploads/system/uploads/attachment\\_data/file/1018698/S1373\\_Direct\\_and\\_Indirect\\_Health\\_Impacts\\_of\\_C19\\_Detailed\\_Paper\\_.pdf](https://assets.publishing.service.gov.uk/government/uploads/system/uploads/attachment_data/file/1018698/S1373_Direct_and_Indirect_Health_Impacts_of_C19_Detailed_Paper_.pdf)
10. Fisher R, Dunn P, Asaria M, Thorlby R. Level or not? Comparing general practice in areas of high and low socioeconomic deprivation in England. London; 2020 Sep.
11. NHS. NHS Long Term Plan Summary. NHS Improv. 2019;
12. Moscrop A. Health inequalities in primary care: Time to face justice. Vol. 62, *British Journal of General Practice.* 2012.
13. Cookson R, Mondor L, Asaria M, Kringos DS, Klazinga NS, Wodchis WP. Primary care and health inequality: Difference-in-difference study comparing England and Ontario. *PLoS One.* 2017;12(11).
14. IFG. Timeline of UK coronavirus lockdowns, March 2020 to March 2021 [Internet]. Institute for Government . 2021 [cited 2021 Oct 14]. Available from: <https://www.instituteforgovernment.org.uk/sites/default/files/timeline-lockdown-web.pdf>
15. Health and Social Care Committee & Science and Technology Committee. Coronavirus: lessons learned to date [Internet]. London; 2021 Oct [cited 2021 Oct 14]. Available from: <https://committees.parliament.uk/work/657/coronavirus-lessons-learnt/news/157991/coronavirus-lessons-learned-to-date-report-published/>
16. Carr MJ, Steeg S, Webb RT, Kapur N, Chew-Graham CA, Abel KM, et al. Effects of the COVID-19 pandemic on primary care-recorded mental illness and self-harm episodes in the UK: a population-based cohort study. *Lancet Public Heal.* 2021;6(2).

17. Herrett E, Gallagher AM, Bhaskaran K, Forbes H, Mathur R, Staa T van, et al. Data Resource Profile: Clinical Practice Research Datalink (CPRD). *Int J Epidemiol*. 2015;44(3).
18. Padmanabhan S, Carty L, Cameron E, Ghosh RE, Williams R, Strongman H. Approach to record linkage of primary care data from Clinical Practice Research Datalink to other health-related patient data: overview and implications. *Eur J Epidemiol*. 2019;34(1).
19. NHS, PHE. The Cancer Alliance Data, Evaluation and Analysis Service [Internet]. National Cancer Registration and Analysis Service: Local Cancer Intelligence. 2021 [cited 2021 Oct 14]. Available from: [http://www.ncin.org.uk/local\\_cancer\\_intelligence/cadeas#covid-19](http://www.ncin.org.uk/local_cancer_intelligence/cadeas#covid-19)
20. Breslow NE, Day NE. Statistical methods in cancer research. Volume II--The design and analysis of cohort studies. IARC scientific publications. 1987.
21. Raymond E, Thieblemont C, Alran S, Faivre S. Impact of the COVID-19 Outbreak on the Management of Patients with Cancer. Vol. 15, Targeted Oncology. 2020.
22. UK Government. Staying at home and away from others (social distancing) [Internet]. Cabinet Office. 2020 [cited 2021 Oct 29]. Available from: <https://www.gov.uk/government/publications/full-guidance-on-staying-at-home-and-away-from-others>
23. Green MA, McKee M, Katikireddi SV. Remote general practitioner consultations during COVID-19. *Lancet Digit Heal*. 2022 Jan;4(1):e7.
24. Dunn P, Allen L, Cameron G, Malhotra AM, Alderwick H. COVID-19 policy tracker 2020: A timeline of national policy and health system responses to COVID-19 in England [Internet]. The Health Foundation. 2021 [cited 2022 Jan 25]. Available from: <https://www.health.org.uk/news-and-comment/charts-and-infographics/covid-19-policy-tracker>
25. Elliss-Brookes L, McPhail S, Ives A, Greenslade M, Shelton J, Hiom S, et al. Routes to diagnosis for cancer - Determining the patient journey using multiple routine data sets. *Br J Cancer*. 2012;107(8).
26. Wanat M, Hoste M, Gobat N, Anastasaki M, Böhmer F, Chlabicz S, et al. Transformation of primary care during the COVID-19 pandemic: Experiences of healthcare professionals in eight European countries. *Br J Gen Pract*. 2021;71(709).
27. Ekman B, Arvidsson E, Thulesius H, Wilkens J, Cronberg O. Impact of the Covid-19 pandemic on primary care utilization: evidence from Sweden using national register data. *BMC Res Notes*. 2021;14(1).
28. Sagan A, Webb E, Azzopardi-Muscat N, de la Mata I, McKee M, Figueras J. Health systems resilience during COVID-19: Lessons for building back better [Internet]. 2021 Nov [cited 2022 Feb 17]. Available from: <https://eurohealthobservatory.who.int/publications/i/health-systems-resilience-during-covid-19-lessons-for-building-back-better>
29. Dinmohamed AG, Visser O, Verhoeven RHA, Louwman MWJ, van Nederveen FH, Willems SM, et al. Fewer cancer diagnoses during the COVID-19 epidemic in the Netherlands. *Lancet Oncol*. 2020 Jun;21(6):750–1.
30. Peacock HM, Tambuyzer T, Verdoodt F, Calay F, Poirel HA, De Schutter H, et al. Decline and incomplete recovery in cancer diagnoses during the COVID-19 pandemic in Belgium: a year-long, population-level analysis. *ESMO Open*. 2021 Aug;6(4):100197.
31. Arnold M, Rutherford MJ, Bardot A, Ferlay J, Andersson TML, Myklebust TÅ, et al. Progress in cancer survival, mortality, and incidence in seven high-income countries 1995–2014 (ICBP SURVMARK-2): a population-based study. *Lancet Oncol*. 2019;20(11).
32. Riera R, Bagattini ÂM, Pacheco RL, Pachito DV, Roitberg F, Ilbawi A. Delays and Disruptions in Cancer Health Care Due to COVID-19 Pandemic: Systematic Review. *JCO Glob Oncol*. 2021;(7).
33. Gurney JK, Millar E, Dunn A, Pirie R, Mako M, Manderson J, et al. The impact of the COVID-19 pandemic on cancer diagnosis and service access in New Zealand—a country pursuing COVID-19 elimination. *Lancet Reg Heal* -

West Pacific. 2021;10.

34. Priou S, Lamé G, Chatellier G, Tournigand C, Kempf E. Effect of the COVID-19 pandemic on colorectal cancer care in France. Vol. 6, *The Lancet Gastroenterology and Hepatology*. 2021.
35. Jacob L, Loosen SH, Kalder M, Luedde T, Roderburg C, Kostev K. Impact of the COVID-19 pandemic on cancer diagnoses in general and specialized practices in Germany. *Cancers (Basel)*. 2021;13(3).
36. Morris EJA, Goldacre R, Spata E, Mafham M, Finan PJ, Shelton J, et al. Impact of the COVID-19 pandemic on the detection and management of colorectal cancer in England: a population-based study. *Lancet Gastroenterol Hepatol*. 2021;6(3).
37. Cancer Waiting Times Team: NHS England and NHS Improvement. Cancer Wait Times Statistics [Internet]. NHS England. 2021 [cited 2021 Oct 25]. Available from: <https://www.england.nhs.uk/statistics/statistical-work-areas/cancer-waiting-times/>
38. Sud A, Torr B, Jones ME, Broggio J, Scott S, Loveday C, et al. Effect of delays in the 2-week-wait cancer referral pathway during the COVID-19 pandemic on cancer survival in the UK: a modelling study. *Lancet Oncol*. 2020;21(8).
39. Greenwood E, Swanton C. Consequences of COVID-19 for cancer care — a CRUK perspective. Vol. 18, *Nature Reviews Clinical Oncology*. 2021.
40. Figueroa JD, Gray E, Pashayan N, Deandrea S, Karch A, Vale DB, et al. The impact of the Covid-19 pandemic on breast cancer early detection and screening. *Prev Med (Baltim)*. 2021 Oct;151:106585.
41. Noel CW, Li Q, Sutradhar R, Eskander A. Total Laryngectomy Volume During the COVID-19 Pandemic. *JAMA Otolaryngol Neck Surg*. 2021 Oct 1;147(10):909.
42. Longo F, Trecca EMC, D'Ecclesia A, Copelli C, Tewfik K, Manfuso A, et al. Managing head and neck cancer patients during the COVID-19 pandemic: the experience of a tertiary referral center in southern Italy. Vol. 16, *Infectious Agents and Cancer*. 2021.
43. Solis RN, Mehrzad M, Faiq S, Frusciante RP, Sekhon HK, Abouyared M, et al. The Impact of COVID-19 on Head and Neck Cancer Treatment: Before and During the Pandemic. *OTO Open*. 2021 Oct 23;5(4):2473974X2110680.
44. Iqbal MS, Uzzaman L, Fox H, Munro S, Kelly C. The impact of COVID-19 on the presentation, stage and management of head and neck cancer patients: A real-time assessment. *Clin Otolaryngol*. 2022 Jan 26;47(1):251–3.
45. Monroy-Iglesias MJ, Tagliabue M, Dickinson H, Roberts G, De Berardinis R, Russell B, et al. Continuity of cancer care: The surgical experience of two large cancer hubs in london and milan. *Cancers (Basel)*. 2021;13(7).
46. Coleman MP, Rachet B, Woods LM, Mitry E, Riga M, Cooper N, et al. Trends and socioeconomic inequalities in cancer survival in England and Wales up to 2001. *Br J Cancer*. 2004;90(7).
47. Cancer Research UK. Cancer incidence for all cancers combined: cancer incidence by deprivation [Internet]. 2020 [cited 2021 Oct 14]. Available from: <https://www.cancerresearchuk.org/health-professional/cancer-statistics/incidence/all-cancers-combined#heading=Three>
48. Tudor Hart J. THE INVERSE CARE LAW. *Lancet*. 1971;297(7696).
49. Gopfert A, Deeny SR, Fisher R, Stafford M. Primary care consultation length by deprivation and multimorbidity in England: An observational study using electronic patient records. *Br J Gen Pract*. 2021;71(704).
50. Ingram E, Ledden S, Beardon S, Gomes M, Hogarth S, Mcdonald H, et al. Household and area-level social determinants of multimorbidity: a systematic review. Vol. 75, *Journal of Epidemiology and Community Health*. 2021.
51. NHS. Appointments in General Practice - September 2021 [Internet]. NHS Digital. 2021 [cited 2021 Nov 16].

Available from: <https://digital.nhs.uk/data-and-information/publications/statistical/appointments-in-general-practice>

52. Roland M, Everington S. Tackling the crisis in general practice. BMJ. 2016;
53. Levit LA, Balogh EP, Nass SJ, Ganz PA. Delivering high-quality cancer care: Charting a new course for a system in crisis. Delivering High-Quality Cancer Care: Charting a New Course for a System in Crisis. 2014.

## Key messages

- Primary care is key part of the pathway for early cancer diagnosis through both routine and 2ww referrals
- Cancer diagnosis rates have experienced a sustained fall since the start of the COVID-19 pandemic and introduction of non-pharmaceutical interventions (NPIs) 'lockdowns'.
- The fall in urgent cancer referral is larger than the fall in primary care contacts, implying that the content of consultations has shifted away from potential cancer diagnosis.
- Despite having a smaller reduction in primary care contact through the pandemic, patients living in poorer areas have had larger reductions in urgent cancer referrals and first treatments for new cancer.
- Government, patients and primary care staff must work together to catch up on missing diagnosis.
- Resilience in primary care is key for the cancer diagnosis pathway and must be developed for future disruptions, particularly in poorer areas where care is more complex.

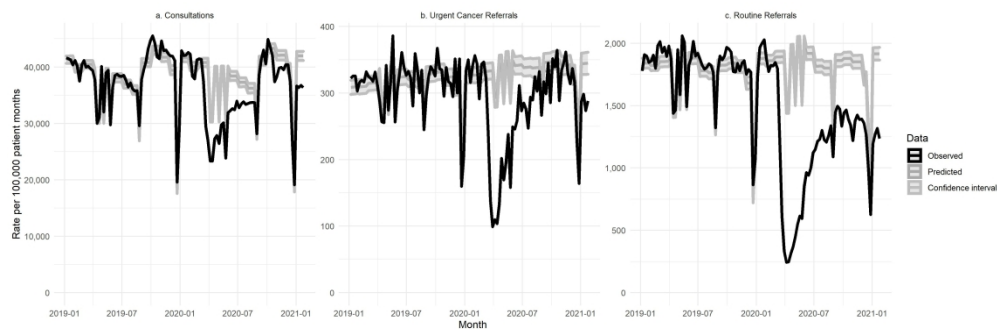

Figure 1: Observed vs expected primary care activity, 01 Jan 2019 – 30 January 2021 (per 100,000 patient-months) (CPRD Aurum data) Panels: a. Consultations, b. Urgent cancer (2 week wait) referrals from primary care, c. Routine referrals from primary care

381x127mm (300 x 300 DPI)

1  
2  
3  
4  
5  
6  
7  
8  
9  
10  
11  
12  
13  
14  
15  
16  
17  
18  
19  
20  
21  
22  
23  
24  
25  
26  
27  
28  
29  
30  
31  
32  
33  
34  
35  
36  
37  
38  
39  
40  
41  
42  
43  
44  
45  
46  
47  
48  
49  
50  
51  
52  
53  
54  
55  
56  
57  
58  
59  
60

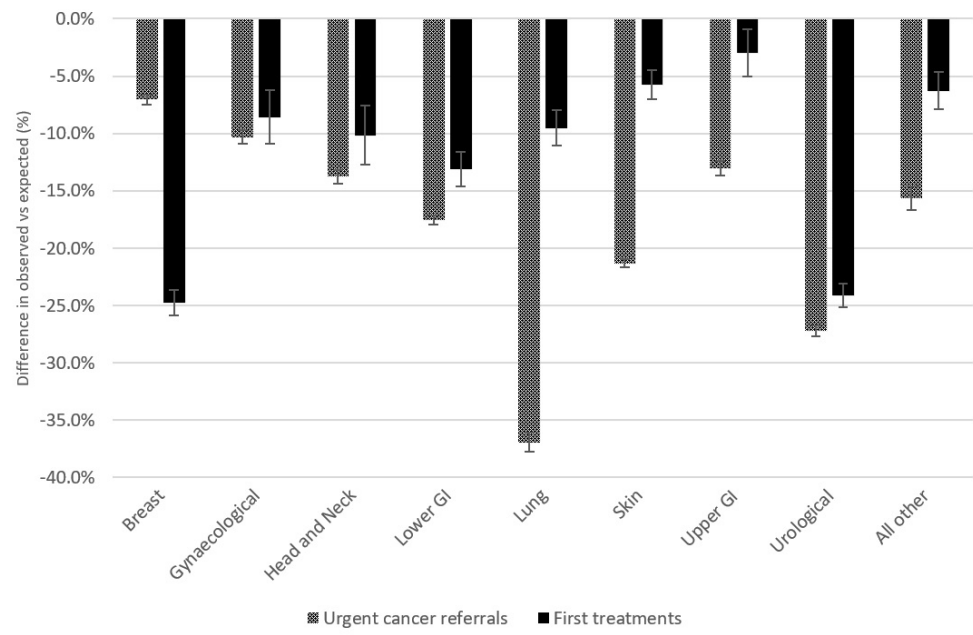

Figure 2: Percentage difference between observed and expected first treatments for new cancer and urgent cancer referrals by tumour location from NCRAS Cancer equity data pack (% , 01 Apr 2020 to 31 Jan 2021)

233x150mm (120 x 120 DPI)

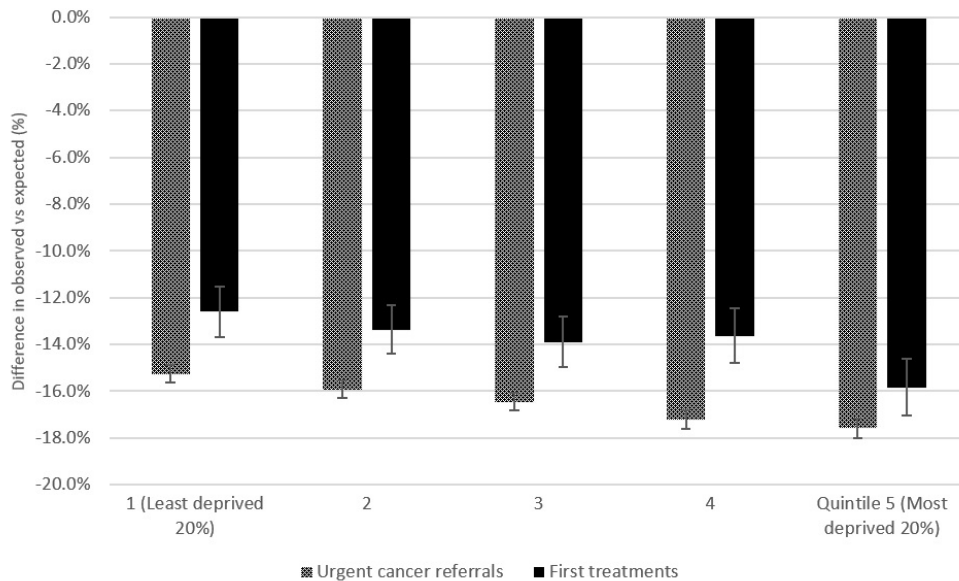

Figure 3: Percentage difference between observed and expected urgent cancer referrals and first treatments for cancer by IMD quintile (01 Apr 2020 – 31 Jan 2021)

205x122mm (120 x 120 DPI)



## Annex 1: NCRAS data equity pack, technical notes

CADEAS and NCRAS have produced two equity data packs presenting the latest national data on the number of urgent suspected two-week wait referrals and first definitive treatments for cancer. These data packs are produced on the basis of the Cancer Wait Times data, with analysis from Hospital Episode Statistics (HES) and other sources outlined in their technical notes.

"Any differences between treatment volumes in the published official statistics and the volumes presented in this pack are because:

- Data was extracted from the CWT system at a slightly different time.
- Data included here is based on England residents only.

Additional logic has been applied to remove treatments where some of the information required for this equity analysis is missing or there are potential data quality issues, for example cases with a mismatch between the suspected cancer referral type and sex (eg. gynaecological cancer treatments for men, testicular cancer treatments for women), and suspected cancer referral type and age (eg. suspected children's cancer for patients aged 20 and over)." – NCRAS Cancer data equity pack technical notes, final tab within the downloaded spreadsheet. Available under "Links to data":

[http://www.ncin.org.uk/local\\_cancer\\_intelligence/cadeas](http://www.ncin.org.uk/local_cancer_intelligence/cadeas) as at 26/01/2022

## Annex 2: Consultation definition

CPRD Aurum data dictionary sets out the structure of the data. Within the consultation file there are two variables one can use to identify whether a primary care contact, rather than an administrative note ("EMIS® consultation source identifier" and "Consultation source code identifier").

The EMIS consultation source identifier is the primary variable used. We include the following observations of this variable:

Acute visit, Casualty attendance, Clinic, Emergency appointment, Emergency consultation, Enterprise consultation, Face to face consultation, Follow-up/routine visit, Gp surgery, Home visit, Home visit note, Main surgery, Nursing home, Nursing home visit note, Online services message, Other, Residential home, Residential home visit note, Same day appointment, Surgery consultation, Telephone encounter, Urgent consultation, Walk-in centre, Walk-in clinic

We also include instances where EMIS consultation source identifier is "awaiting review" and the Consultation source code identifier is in the following list:

Consultation, visit, seen in gp unit, seen in private clinic, seen in rapid access clinic at gp surgery, seen in urgent care centre, online communication.

We then further exclude records on the basis of the category of staff responsible for the record. The "Job category" variable from the staff file, linked by the consultation id is used. We only include as a consultation records filled out by GPs, doctors, nurses and other health care professionals as defined in CPRD's numerical codes listed below:

GP – 4, 5, 15, 24, 31, 181, 183

Dr – 1, 41, 91, 116, 119, 121, 126, 173, 177, 197

Nurse – 8, 9, 27, 33, 47, 48, 50, 55, 59, 60, 61, 111

Other healthcare professional - 2, 3, 6, 7, 10:14, 16, 17, 34:37, 42, 43, 52, 54, 58, 62:65, 68, 72, 73, 77, 80, 82, 83, 86:89, 94, 95, 97, 100:102, 105, 106, 112:114, 118, 122, 125, 127, 131, 135, 136, 138, 141, 142, 145, 148, 149, 154, 156, 158, 168, 185, 186, 188, 189, 204, 208

In Table A2.1 we present the CPRD Aurum Staff Category list.

In Table A2.2 we present the total number of consultations identified from 01 January 2016 to 31 January 2021, the count with each combination of staff category, "EMIS® consultation source identifier" and "Consultation source code identifier" in Table A2.2 we show the count of records that were excluded, highlighting those that were excluded on the basis of staff category, not the consultation file description variables.

Table A2.1: CPRD Aurum Staff Job Categories

|    |                                                  |                                              |
|----|--------------------------------------------------|----------------------------------------------|
| 1  | 1 Consultant                                     | 51 Helper/Assistant                          |
| 2  | 2 Hospital Practitioner                          | 52 Community Mental Health Nurse             |
| 3  | 3 Clinical Medical Officer                       | 53 Senior Administrator                      |
| 4  | 4 General Medical Practitioner                   | 54 Technician - Healthcare Scientists        |
| 5  | 5 Salaried General Practitioner                  | 55 Associate Practitioner - Nurse            |
| 6  | 6 Midwife - Sister/Charge Nurse                  | 56 Senior Manager                            |
| 7  | 7 Midwife                                        | 57 Community Administrator                   |
| 8  | 8 Community Practitioner                         | 58 Associate Specialist                      |
| 9  | 9 Community Nurse                                | 59 Student Practice Nurse                    |
| 10 | 10 Chiropodist/Podiatrist                        | 60 Nurse Manager                             |
| 11 | 11 Dietitian                                     | 61 Sister/Charge Nurse                       |
| 12 | 12 Pharmacist                                    | 62 Psychotherapist                           |
| 13 | 13 Clinical Psychologist                         | 63 Osteopath                                 |
| 14 | 14 Health Care Support Worker                    | 64 Social Care Support Worker                |
| 15 | 15 Associate Practitioner - General Practitioner | 65 Assistant Psychologist                    |
| 16 | 16 Counsellor                                    | 66 Officer                                   |
| 17 | 17 Phlebotomist                                  | 67 Technician - Admin & Clerical             |
| 18 | 18 Clerical Worker                               | 68 Psychiatrist                              |
| 19 | 19 Manager                                       | 69 Health Records Clerk                      |
| 20 | 20 Analyst                                       | 70 Desktop Support Technician                |
| 21 | 21 System Administrator                          | 71 Dispenser                                 |
| 22 | 22 Desktop Support Administrator                 | 72 Clinical Assistant                        |
| 23 | 23 System Worker                                 | 73 Practitioner                              |
| 24 | 24 GP Registrar                                  | 74 Information Officer                       |
| 25 | 25 Medical Student                               | 75 Network Administrator                     |
| 26 | 26 Other Community Health Service - Admin Clerk  | 76 Chaplain                                  |
| 27 | 27 Specialist Nurse Practitioner                 | 77 Student Physiotherapist                   |
| 28 | 28 Receptionist                                  | 78 Paramedic Specialist Practitioner         |
| 29 | 29 Secretary                                     | 79 Clinical Team Manager                     |
| 30 | 30 Medical Secretary                             | 80 Physiotherapist Specialist Practitioner   |
| 31 | 31 Sessional GP                                  | 81 Helpdesk Technician                       |
| 32 | 32 Clinical Application Administrator            | 82 Radiographer                              |
| 33 | 33 Nurse Consultant                              | 83 Other Community Health Service            |
| 34 | 34 Physiotherapist                               | 84 Call Operator                             |
| 35 | 35 Specialist Practitioner                       | 85 Community Worker (children)               |
| 36 | 36 Healthcare Assistant                          | 86 Paramedic Consultant                      |
| 37 | 37 Medical Technical Officer - Pharmacy          | 87 Associate Practitioner                    |
| 38 | 38 Health Records Administrator                  | 88 Modern Matron                             |
| 39 | 39 Helpdesk Administrator                        | 89 Asst. Clinical Medical Officer            |
| 40 | 40 Appointments Clerk                            | 90 Community Team Manager                    |
| 41 | 41 Senior House Officer                          | 91 Specialist Registrar                      |
| 42 | 42 Social Worker                                 | 92 Chiropodist/Podiatrist Manager            |
| 43 | 43 Trainee Practitioner                          | 93 Radiographer - Therapeutic, Manager       |
| 44 | 44 Network Technician                            | 94 Optometrist                               |
| 45 | 45 Clinical Coder                                | 95 Assistant Practitioner                    |
| 46 | 46 Medical Records Clerk                         | 96 Community Learning Disabilities Nurse     |
| 47 | 47 Staff Nurse                                   | 97 Technician - Additional Clinical Services |
| 48 | 48 Enrolled Nurse                                | 98 Student Health Visitor                    |
| 49 | 49 Multi Therapist                               | 99 Interpreter                               |
| 50 | 50 Nursery Nurse                                 | 100 Medical Technical Officer                |

|    |                                                    |                                                         |
|----|----------------------------------------------------|---------------------------------------------------------|
| 1  |                                                    |                                                         |
| 2  |                                                    |                                                         |
| 3  | 101 Midwife - Specialist Practitioner              |                                                         |
| 4  | 102 Occupational Therapist                         |                                                         |
| 5  | 103 Chief Executive                                |                                                         |
| 6  | 104 Audit Manager                                  | 151 Finance Director                                    |
| 7  | 105 Paramedic                                      | 152 Senior social worker (adults)                       |
| 8  | 106 Physiotherapist Consultant                     | 153 Student Midwife                                     |
| 9  | 107 Availability Monitor                           | 154 Radiologist                                         |
| 10 | 108 Medical Laboratory Assistant                   | 155 Ward Manager                                        |
| 11 | 109 Gateway Worker                                 | 156 Midwife - Manager                                   |
| 12 | 110 Medical Records Manager                        | 157 Waiting List Manager                                |
| 13 | 111 Student Nurse - Adult Branch                   | 158 Radiographer - Diagnostic, Specialist Practitioner  |
| 14 | 112 Audiologist                                    | 159 Biomedical Scientist                                |
| 15 | 113 Radiographer - Diagnostic                      | 160 Board Level Director                                |
| 16 | 114 Therapist                                      | 161 Non Executive Director                              |
| 17 | 115 Student District Nurse                         | 162 Nursing Cadet                                       |
| 18 | 116 House Officer - Post Registration              | 163 Porter                                              |
| 19 | 117 Speech & Language Therapist                    | 164 Social services care manager (adults)               |
| 20 | 118 Dietitian Specialist Practitioner              | 165 Student Psychotherapist                             |
| 21 | 119 Trust Grade Doctor - SHO level                 | 166 Orthoptist                                          |
| 22 | 120 Director of Public Health                      | 167 Clinical Director - Medical                         |
| 23 | 121 Staff Grade                                    | 168 Approved Social Worker                              |
| 24 | 122 Patient Welfare Officer                        | 169 Student Community Mental Health Nurse               |
| 25 | 123 Occupational Therapy Specialist Practitioner   | 170 Other Executive Director                            |
| 26 | 124 Technician - PS&T                              | 171 Student Orthoptist                                  |
| 27 | 125 Chiropodist/Podiatrist Consultant              | 172 Childcare Co-ordinator                              |
| 28 | 126 Trust Grade Doctor - Career Grade level        | 173 House Officer - Pre Registration                    |
| 29 | 127 Student Community Practitioner                 | 174 SODP                                                |
| 30 | 128 Healthcare Scientist                           | 175 Outpatient Manager                                  |
| 31 | 129 Waiting List Clerk                             | 176 Medical Director                                    |
| 32 | 130 Clinical Director                              | 177 Trust Grade Doctor - Specialist Registrar level     |
| 33 | 131 Pre-reg Pharmacist                             | 178 Senior Clinical Medical Officer                     |
| 34 | 132 Mental Health Act Administrator                | 179 Consultant Healthcare Scientist                     |
| 35 | 133 Ward Clerk                                     | 180 Reporting Radiographer                              |
| 36 | 134 Support, Time, Recovery Worker                 | 181 Locum GP                                            |
| 37 | 135 Art Therapist Specialist Practitioner          | 182 Researcher                                          |
| 38 | 136 Physiotherapist Manager                        | 183 Assistant GP                                        |
| 39 | 137 Healthcare Cadet                               | 184 Special salary scale in Public Health Medicine      |
| 40 | 138 Dietitian Consultant                           | 185 Advanced Practitioner                               |
| 41 | 139 Orthoptist Manager                             | 186 Health Visitor                                      |
| 42 | 140 Social work assistant (mental health)          | 187 Dental Assistant Clinical Director                  |
| 43 | 141 Chiropodist/Podiatrist Specialist Practitioner | 188 Other Community Health Service - Social Care Worker |
| 44 | 142 Student Technician                             | 189 Physician Assistant                                 |
| 45 | 143 Complaints Investigator                        | 190 Deputising Doctor                                   |
| 46 | 144 Trainee Scientist                              | 191 Student Occupational Health Nurse                   |
| 47 | 145 Radiographer - Diagnostic, Manager             | 192 Senior social worker (mental health)                |
| 48 | 146 Social services care manager (mental health)   | 193 Regional Dental Officer                             |
| 49 | 147 Dietitian Manager                              | 194 Trainer                                             |
| 50 | 148 Midwife - Consultant                           | 195 Cytoscreener                                        |
| 51 | 149 Art Therapist Consultant                       | 196 Chair                                               |
| 52 | 150 Paramedic Manager                              | 197 Trust Grade Doctor - House Officer level            |
| 53 | 201 Healthcare Science Assistant                   | 198 Art Therapist                                       |
| 54 | 202 Social work assistant (adults)                 | 199 Multi Therapist Specialist Practitioner             |
| 55 | 203 Social work team manager (adults)              | 200 Drama Therapist                                     |
| 56 |                                                    |                                                         |
| 57 |                                                    |                                                         |
| 58 |                                                    |                                                         |
| 59 |                                                    |                                                         |
| 60 |                                                    |                                                         |

1  
2  
3 204 Intermediate Care worker  
4 205 Student Occupational Therapist  
5 206 Student Dietitian  
6 207 Healthcare Science Associate  
7 208 Child Protection worker  
8 209 Professor  
9 210 General Dental Practitioner  
10 211 Student School Nurse  
11 212 Occupational Therapist Consultant  
12 213 Intermediate Care staff  
13 214 Home help  
14 215 Art, Music & Drama Student  
15 216 Specialist Healthcare Scientist  
16 217 Social Services information manager  
17  
18  
19  
20  
21  
22  
23  
24  
25  
26  
27  
28  
29  
30  
31  
32  
33  
34  
35

36 Table A2.2: Number of observations by EMIS® consultation source identifier, Consultation source code identifier and Staff Job  
37 Category, with an indicator for whether it was included as a consultation: Include: 1 = Include, 0 = Exclude, "Excl. job title" =  
38 Excluded on the basis of job title.  
39

| Include | Staff Job Category  | Consultation source code identifier | EMIS consultation source identifier | Count     |
|---------|---------------------|-------------------------------------|-------------------------------------|-----------|
| 1       | gp                  | gp surgery                          | gp surgery                          | 3,119,080 |
| 1       | nurse               | gp surgery                          | gp surgery                          | 1,692,606 |
| 1       | gp                  | telephone consultation              | telephone consultation              | 1,471,946 |
| 1       | other care provider | gp surgery                          | gp surgery                          | 977,067   |
| 1       | nurse               | telephone consultation              | telephone consultation              | 196,665   |
| 1       | gp                  | telephone call to a patient         | telephone call to a patient         | 108,025   |
| 1       | gp                  | home visit note                     | home visit note                     | 83,600    |
| 1       | other care provider | telephone consultation              | telephone consultation              | 81,980    |
| 1       | nurse               | telephone call to a patient         | telephone call to a patient         | 32,423    |
| 1       | gp                  | face to face consultation           | face to face consultation           | 25,435    |
| 1       | nurse               | home visit note                     | home visit note                     | 24,174    |
| 1       | other care provider | telephone call to a patient         | telephone call to a patient         | 23,194    |
| 1       | gp                  | gp surgery                          | surgery consultation                | 22,756    |

|    |   |                     |                                                     |                               |        |
|----|---|---------------------|-----------------------------------------------------|-------------------------------|--------|
| 1  |   |                     |                                                     |                               |        |
| 2  |   |                     |                                                     |                               |        |
| 3  | 1 | gp                  | nursing home visit note                             | nursing home visit note       | 21,357 |
| 4  | 1 | nurse               | face to face consultation                           | face to face consultation     | 17,580 |
| 5  | 1 | gp                  | enterprise consultation                             | enterprise consultation       | 14,904 |
| 6  | 1 | gp                  | telephone call from a patient                       | telephone call from a patient | 13,062 |
| 7  | 1 | gp                  | routine consultation                                | surgery consultation          | 11,668 |
| 8  | 1 | other care provider | home visit note                                     | home visit note               | 10,853 |
| 9  |   |                     |                                                     |                               |        |
| 10 | 1 | gp                  | provision of general practitioner intermediate care | gp surgery                    | 10,441 |
| 11 | 1 | gp                  | emergency consultation                              | emergency consultation        | 10,351 |
| 12 | 1 | gp                  | residential home visit note                         | residential home visit note   | 9,579  |
| 13 |   |                     |                                                     |                               |        |
| 14 | 1 | other care provider | face to face consultation                           | face to face consultation     | 9,350  |
| 15 | 1 | gp                  | emergency appointment                               | emergency appointment         | 8,687  |
| 16 | 1 | gp                  | urgent consultation                                 | urgent consultation           | 8,155  |
| 17 | 1 | gp                  | walk-in clinic                                      | walk-in clinic                | 7,908  |
| 18 | 1 | dr                  | gp surgery                                          | gp surgery                    | 7,654  |
| 19 | 1 | gp                  | other note                                          | other                         | 7,520  |
| 20 | 1 | gp                  | face to face consultation                           | surgery consultation          | 6,932  |
| 21 | 1 | nurse               | gp surgery                                          | surgery consultation          | 5,318  |
| 22 | 1 | gp                  | seen in gp unit                                     | surgery consultation          | 4,687  |
| 23 | 1 | gp                  | consultation via video conference                   | awaiting review               | 4,653  |
| 24 | 1 | nurse               | enterprise consultation                             | enterprise consultation       | 4,460  |
| 25 | 1 | other care provider | provision of general practitioner intermediate care | gp surgery                    | 4,369  |
| 26 | 1 | gp                  | clinic note                                         | surgery consultation          | 3,823  |
| 27 | 1 | nurse               | residential home visit note                         | residential home visit note   | 3,612  |
| 28 | 1 | nurse               | clinic note                                         | clinic                        | 3,585  |
| 29 | 1 | nurse               | nursing home visit note                             | nursing home visit note       | 3,528  |
| 30 | 1 | nurse               | face to face consultation                           | surgery consultation          | 3,442  |
| 31 | 1 | gp                  | online communication                                | awaiting review               | 3,410  |
| 32 | 1 | other care provider | other note                                          | other                         | 3,406  |
| 33 | 1 | other care provider | seen in gp unit                                     | gp surgery                    | 2,781  |
| 34 | 1 | gp                  | e-mail consultation                                 | awaiting review               | 2,523  |
| 35 | 1 | nurse               | other note                                          | other                         | 2,449  |
| 36 | 1 | other care provider | gp surgery                                          | surgery consultation          | 2,334  |
| 37 | 1 | other care provider | enterprise consultation                             | enterprise consultation       | 2,318  |
| 38 | 1 | other care provider | telephone call from a patient                       | telephone call from a patient | 2,211  |
| 39 | 1 | nurse               | telephone call from a patient                       | telephone call from a patient | 2,183  |
| 40 | 1 | gp                  | routine consultation                                | awaiting review               | 2,117  |
| 41 | 1 | nurse               | emergency appointment                               | emergency appointment         | 2,041  |
| 42 | 1 | gp                  | home visit note                                     | home visit                    | 2,021  |
| 43 | 1 | gp                  | seen in gp unit                                     | gp surgery                    | 1,896  |
| 44 |   |                     |                                                     |                               |        |
| 45 | 1 | nurse               | provision of general practitioner intermediate care | gp surgery                    | 1,762  |
| 46 |   |                     |                                                     |                               |        |
| 47 |   |                     |                                                     |                               |        |
| 48 |   |                     |                                                     |                               |        |
| 49 |   |                     |                                                     |                               |        |
| 50 |   |                     |                                                     |                               |        |
| 51 |   |                     |                                                     |                               |        |
| 52 |   |                     |                                                     |                               |        |
| 53 |   |                     |                                                     |                               |        |
| 54 |   |                     |                                                     |                               |        |
| 55 |   |                     |                                                     |                               |        |
| 56 |   |                     |                                                     |                               |        |
| 57 |   |                     |                                                     |                               |        |
| 58 |   |                     |                                                     |                               |        |
| 59 |   |                     |                                                     |                               |        |
| 60 |   |                     |                                                     |                               |        |

|    |   |                     |                                               |                             |       |
|----|---|---------------------|-----------------------------------------------|-----------------------------|-------|
| 1  |   |                     |                                               |                             |       |
| 2  |   |                     |                                               |                             |       |
| 3  |   |                     |                                               |                             |       |
| 4  | 1 | other care provider | clinic note                                   | clinic                      | 1,699 |
| 5  | 1 | nurse               | clinic note                                   | surgery consultation        | 1,628 |
| 6  | 1 | gp                  | clinic note                                   | clinic                      | 1,623 |
| 7  | 1 | nurse               | routine consultation                          | surgery consultation        | 1,578 |
| 8  | 1 | nurse               | seen in gp unit                               | surgery consultation        | 1,426 |
| 9  | 1 | nurse               | walk-in clinic                                | walk-in clinic              | 1,412 |
| 10 | 1 | nurse               | gp surgery                                    | clinic                      | 1,355 |
| 11 | 1 | other care provider | routine consultation                          | other                       | 1,303 |
| 12 | 1 | other care provider | clinic note                                   | surgery consultation        | 1,297 |
| 13 | 1 | gp                  | face to face consultation                     | emergency consultation      | 1,292 |
| 14 | 1 | other care provider | walk-in clinic                                | walk-in clinic              | 1,216 |
| 15 | 1 | gp                  | telephone encounter                           | telephone encounter         | 1,184 |
| 16 | 1 | gp                  | online communication                          | online services message     | 1,139 |
| 17 | 1 | gp                  | other consultation medium used                | awaiting review             | 1,134 |
| 18 | 1 | other care provider | residential home visit note                   | residential home visit note | 1,113 |
| 19 | 1 | nurse               | seen in gp unit                               | gp surgery                  | 1,103 |
| 20 | 1 | other care provider | nursing home visit note                       | nursing home visit note     | 1,081 |
| 21 | 1 | other care provider | face to face consultation                     | surgery consultation        | 1,045 |
| 22 | 1 | other care provider | seen in gp unit                               | surgery consultation        | 1,043 |
| 23 | 1 | nurse               | emergency consultation                        | emergency consultation      | 1,024 |
| 24 | 1 | nurse               | urgent consultation                           | urgent consultation         | 959   |
| 25 | 1 | gp                  | extended hours consultation                   | awaiting review             | 924   |
| 26 | 1 | gp                  | routine consultation                          | other                       | 922   |
| 27 | 1 | gp                  | home visit note                               | other                       | 835   |
| 28 | 1 | gp                  | gp surgery                                    | face to face consultation   | 808   |
| 29 | 1 | other care provider | gp surgery                                    | clinic                      | 746   |
| 30 | 1 | other care provider | routine consultation                          | surgery consultation        | 738   |
| 31 | 1 | gp                  | consultation via multimedia                   | awaiting review             | 734   |
| 32 | 1 | gp                  | face to face consultation with relative/carer | awaiting review             | 669   |
| 33 | 1 | nurse               | e-mail consultation                           | awaiting review             | 638   |
| 34 | 1 | nurse               | routine consultation                          | awaiting review             | 574   |
| 35 | 1 | nurse               | consultation via video conference             | awaiting review             | 505   |
| 36 | 1 | nurse               | routine consultation                          | other                       | 478   |
| 37 | 1 | other care provider | online communication                          | awaiting review             | 473   |
| 38 | 1 | nurse               | same day appointment                          | same day appointment        | 468   |
| 39 | 1 | gp                  | face to face consultation                     | gp surgery                  | 461   |
| 40 | 1 | gp                  | same day appointment                          | same day appointment        | 457   |
| 41 | 1 | nurse               | gp surgery                                    | face to face consultation   | 455   |
| 42 | 1 | gp                  | telephone encounter                           | telephone consultation      | 429   |
| 43 | 1 | nurse               | face to face consultation                     | emergency consultation      | 420   |

|    |   |                     |                                                |                             |     |
|----|---|---------------------|------------------------------------------------|-----------------------------|-----|
| 1  |   |                     |                                                |                             |     |
| 2  |   |                     |                                                |                             |     |
| 3  | 1 | gp                  | group consultation                             | awaiting review             | 402 |
| 4  | 1 | nurse               | home visit note                                | other                       | 402 |
| 5  | 1 | nurse               | seen in urgent care centre                     | awaiting review             | 344 |
| 6  | 1 | gp                  | face to face consultation                      | emergency appointment       | 330 |
| 7  | 1 | gp                  | seen in urgent care centre                     | awaiting review             | 322 |
| 8  | 1 | nurse               | telephone encounter                            | telephone encounter         | 314 |
| 9  |   |                     |                                                |                             |     |
| 10 |   |                     |                                                |                             |     |
| 11 | 1 | other care provider | consultation via video conference              | awaiting review             | 288 |
| 12 | 1 | gp                  | telephone consultation                         | telephone call to a patient | 287 |
| 13 | 1 | dr                  | telephone consultation                         | telephone consultation      | 279 |
| 14 | 1 | nurse               | online communication                           | awaiting review             | 279 |
| 15 |   |                     |                                                |                             |     |
| 16 | 1 | other care provider | face to face consultation                      | awaiting review             | 272 |
| 17 |   |                     |                                                |                             |     |
| 18 | 1 | other care provider | home visit note                                | home visit                  | 262 |
| 19 |   |                     |                                                |                             |     |
| 20 | 1 | other care provider | routine consultation                           | awaiting review             | 260 |
| 21 | 1 | nurse               | home visit note                                | home visit                  | 246 |
| 22 | 1 | gp                  | consultation via sms text message              | awaiting review             | 244 |
| 23 |   |                     |                                                |                             |     |
| 24 | 1 | other care provider | online communication                           | online services message     | 241 |
| 25 |   |                     |                                                |                             |     |
| 26 | 1 | other care provider | emergency consultation                         | emergency consultation      | 235 |
| 27 |   |                     |                                                |                             |     |
| 28 | 1 | other care provider | emergency appointment                          | emergency appointment       | 231 |
| 29 | 1 | gp                  | telephone encounter                            | telephone call to a patient | 226 |
| 30 | 1 | gp                  | residential home visit note                    | residential home            | 225 |
| 31 | 1 | gp                  | face to face consultation                      | awaiting review             | 224 |
| 32 | 1 | nurse               | face to face consultation                      | gp surgery                  | 221 |
| 33 |   |                     |                                                |                             |     |
| 34 | 1 | other care provider | gp surgery                                     | face to face consultation   | 209 |
| 35 | 1 | nurse               | extended hours consultation                    | awaiting review             | 186 |
| 36 |   |                     |                                                |                             |     |
| 37 | 1 | gp                  | seen in rapid access clinic at gp surgery      | awaiting review             | 182 |
| 38 | 1 | gp                  | school visit note                              | awaiting review             | 181 |
| 39 |   |                     |                                                |                             |     |
| 40 | 1 | other care provider | telephone consultation                         | telephone call to a patient | 179 |
| 41 | 1 | nurse               | face to face consultation                      | awaiting review             | 166 |
| 42 | 1 | gp                  | home visit note                                | acute visit                 | 153 |
| 43 | 1 | nurse               | online communication                           | online services message     | 145 |
| 44 |   |                     |                                                |                             |     |
| 45 | 1 | other care provider | group consultation                             | awaiting review             | 133 |
| 46 | 1 | gp                  | seen in gp unit                                | awaiting review             | 129 |
| 47 | 1 | dr                  | clinic note                                    | surgery consultation        | 125 |
| 48 |   |                     |                                                |                             |     |
| 49 | 1 | other care provider | telephone encounter                            | telephone encounter         | 119 |
| 50 |   |                     |                                                |                             |     |
| 51 | 1 | other care provider | extended hours consultation                    | awaiting review             | 116 |
| 52 |   |                     |                                                |                             |     |
| 53 | 1 | nurse               | face to face consultation with relative/carers | awaiting review             | 115 |
| 54 | 1 | nurse               | seen in gp unit                                | awaiting review             | 109 |
| 55 | 1 | gp                  | night visit note                               | awaiting review             | 108 |
| 56 |   |                     |                                                |                             |     |
| 57 |   |                     |                                                |                             |     |
| 58 |   |                     |                                                |                             |     |
| 59 |   |                     |                                                |                             |     |
| 60 |   |                     |                                                |                             |     |



|    |   |                     |                                               |                               |     |
|----|---|---------------------|-----------------------------------------------|-------------------------------|-----|
| 1  |   |                     |                                               |                               |     |
| 2  |   |                     |                                               |                               |     |
| 3  |   |                     |                                               |                               |     |
| 4  | 1 | nurse               | school visit note                             | awaiting review               | 107 |
| 5  | 1 | nurse               | group consultation                            | awaiting review               | 102 |
| 6  | 1 | gp                  | other consultation medium used                | other                         | 99  |
| 7  | 1 | gp                  | children's home visit note                    | awaiting review               | 95  |
| 8  | 1 | gp                  | telephone consultation                        | telephone call from a patient | 94  |
| 9  | 1 | gp                  | administration note                           | other                         | 91  |
| 10 |   |                     |                                               |                               |     |
| 11 | 1 | nurse               | telephone encounter                           | telephone call to a patient   | 86  |
| 12 |   |                     |                                               |                               |     |
| 13 | 1 | other care provider | e-mail consultation                           | awaiting review               | 71  |
| 14 | 1 | nurse               | consultation via multimedia                   | awaiting review               | 65  |
| 15 | 1 | gp                  | gp surgery                                    | clinic                        | 63  |
| 16 | 1 | nurse               | telephone consultation                        | telephone call to a patient   | 63  |
| 17 |   |                     |                                               |                               |     |
| 18 | 1 | other care provider | face to face consultation with relative/carer | awaiting review               | 62  |
| 19 |   |                     |                                               |                               |     |
| 20 | 1 | gp                  | consultation via telemedicine web camera      | awaiting review               | 61  |
| 21 | 1 | dr                  | telephone call to a patient                   | telephone call to a patient   | 60  |
| 22 |   |                     |                                               |                               |     |
| 23 | 1 | nurse               | laboratory result                             | clinic                        | 55  |
| 24 |   |                     |                                               |                               |     |
| 25 | 1 | other care provider | other consultation medium used                | awaiting review               | 53  |
| 26 | 1 | nurse               | other consultation medium used                | awaiting review               | 51  |
| 27 | 1 | nurse               | district nurse visit                          | awaiting review               | 48  |
| 28 | 1 | gp                  | clinic note                                   | gp surgery                    | 47  |
| 29 |   |                     |                                               |                               |     |
| 30 | 1 | other care provider | clinic note                                   | gp surgery                    | 45  |
| 31 |   |                     |                                               |                               |     |
| 32 | 1 | other care provider | urgent consultation                           | urgent consultation           | 42  |
| 33 |   |                     |                                               |                               |     |
| 34 | 1 | other care provider | home visit note                               | other                         | 41  |
| 35 |   |                     |                                               |                               |     |
| 36 | 1 | other care provider | laboratory result                             | clinic                        | 40  |
| 37 |   |                     |                                               |                               |     |
| 38 | 1 | gp                  | laboratory result                             | acute visit                   | 39  |
| 39 | 1 | dr                  | home visit note                               | home visit note               | 38  |
| 40 |   |                     |                                               |                               |     |
| 41 | 1 | other care provider | telephone encounter                           | telephone call to a patient   | 38  |
| 42 | 1 | nurse               | telephone encounter                           | telephone consultation        | 33  |
| 43 |   |                     |                                               |                               |     |
| 44 | 1 | other care provider | consultation via sms text message             | awaiting review               | 28  |
| 45 | 1 | gp                  | walk-in clinic                                | walk-in centre                | 27  |
| 46 | 1 | nurse               | walk-in clinic                                | walk-in centre                | 27  |
| 47 |   |                     |                                               |                               |     |
| 48 | 1 | other care provider | walk-in clinic                                | clinic                        | 27  |
| 49 |   |                     |                                               |                               |     |
| 50 | 1 | nurse               | children's home visit note                    | awaiting review               | 25  |
| 51 | 1 | gp                  | gp surgery                                    | main surgery                  | 24  |
| 52 | 1 | nurse               | residential home visit note                   | residential home              | 22  |
| 53 |   |                     |                                               |                               |     |
| 54 | 1 | other care provider | seen in urgent care centre                    | awaiting review               | 22  |
| 55 | 1 | nurse               | night visit note                              | awaiting review               | 20  |
| 56 |   |                     |                                               |                               |     |
| 57 | 1 | other care provider | children's home visit note                    | awaiting review               | 19  |
| 58 |   |                     |                                               |                               |     |
| 59 | 1 | other care provider | consultation via multimedia                   | awaiting review               | 19  |
| 60 |   |                     |                                               |                               |     |

|    |   |                     |                                          |                               |      |
|----|---|---------------------|------------------------------------------|-------------------------------|------|
| 1  |   |                     |                                          |                               |      |
| 2  |   |                     |                                          |                               |      |
| 3  |   |                     |                                          |                               |      |
| 4  | 1 | gp                  | home visit note                          | nursing home visit note       | 17   |
| 5  | 1 | gp                  | nursing home visit note                  | nursing home                  | 17   |
| 6  | 1 | gp                  | residential home visit note              | nursing home                  | 15   |
| 7  | 1 | other care provider | face to face consultation                | gp surgery                    | 14   |
| 8  | 1 | other care provider | night visit note                         | awaiting review               | 14   |
| 9  | 1 | other care provider | other consultation medium used           | other                         | 14   |
| 10 | 1 | nurse               | clinic note                              | gp surgery                    | 13   |
| 11 | 1 | nurse               | walk-in clinic                           | clinic                        | 13   |
| 12 | 1 | nurse               | home visit note                          | acute visit                   | 10   |
| 13 | 1 | nurse               | consultation via sms text message        | awaiting review               | < 10 |
| 14 | 1 | nurse               | consultation via telemedicine web camera | awaiting review               | < 10 |
| 15 | 1 | dr                  | consultation via video conference        | awaiting review               | < 10 |
| 16 | 1 | dr                  | nursing home visit note                  | nursing home visit note       | < 10 |
| 17 | 1 | other care provider | home visit note                          | nursing home visit note       | < 10 |
| 18 | 1 | dr                  | other note                               | other                         | < 10 |
| 19 | 1 | gp                  | telephone encounter                      | telephone call from a patient | < 10 |
| 20 | 1 | gp                  | twilight visit note                      | awaiting review               | < 10 |
| 21 | 1 | other care provider | laboratory result                        | acute visit                   | < 10 |
| 22 | 1 | dr                  | face to face consultation                | face to face consultation     | < 10 |
| 23 | 1 | gp                  | home visit note                          | follow-up/routine visit       | < 10 |
| 24 | 1 | gp                  | other consultation medium used           | casualty attendance           | < 10 |
| 25 | 1 | other care provider | home visit note                          | residential home visit note   | < 10 |
| 26 | 1 | other care provider | other note                               | gp surgery                    | < 10 |
| 27 | 1 | gp                  | home visit note                          | awaiting review               | < 10 |
| 28 | 1 | gp                  | non-consultation medication data         | awaiting review               | < 10 |
| 29 | 1 | gp                  | remote consultation                      | awaiting review               | < 10 |
| 30 | 1 | gp                  | third party consultation                 | casualty attendance           | < 10 |
| 31 | 1 | nurse               | home visit note                          | follow-up/routine visit       | < 10 |
| 32 | 1 | nurse               | telephone encounter                      | telephone call from a patient | < 10 |
| 33 | 1 | nurse               | third party consultation                 | casualty attendance           | < 10 |
| 34 | 1 | dr                  | enterprise consultation                  | enterprise consultation       | < 10 |
| 35 | 1 | dr                  | telephone call from a patient            | telephone call from a patient | < 10 |
| 36 | 1 | gp                  | district nurse visit                     | awaiting review               | < 10 |
| 37 | 1 | gp                  | e-mail received from patient             | acute visit                   | < 10 |
| 38 | 1 | gp                  | hospital outpatient report               | casualty attendance           | < 10 |
| 39 | 1 | gp                  | joint consultation                       | awaiting review               | < 10 |
| 40 | 1 | gp                  | pharmacy consultation                    | awaiting review               | < 10 |
| 41 | 1 | gp                  | telephone call to a patient              | telephone consultation        | < 10 |
| 42 | 1 | nurse               | administration note                      | other                         | < 10 |
| 43 | 1 | nurse               | face to face consultation                | emergency appointment         | < 10 |
| 44 | 1 | other care provider | consultation via telemedicine web camera | awaiting review               | < 10 |
| 45 | 1 |                     |                                          |                               |      |
| 46 |   |                     |                                          |                               |      |
| 47 |   |                     |                                          |                               |      |
| 48 |   |                     |                                          |                               |      |
| 49 |   |                     |                                          |                               |      |
| 50 |   |                     |                                          |                               |      |
| 51 |   |                     |                                          |                               |      |
| 52 |   |                     |                                          |                               |      |
| 53 |   |                     |                                          |                               |      |
| 54 |   |                     |                                          |                               |      |
| 55 |   |                     |                                          |                               |      |
| 56 |   |                     |                                          |                               |      |
| 57 |   |                     |                                          |                               |      |
| 58 |   |                     |                                          |                               |      |
| 59 |   |                     |                                          |                               |      |
| 60 |   |                     |                                          |                               |      |

|    |               |                     |                                                     |                               |         |
|----|---------------|---------------------|-----------------------------------------------------|-------------------------------|---------|
| 1  |               |                     |                                                     |                               |         |
| 2  |               |                     |                                                     |                               |         |
| 3  |               |                     |                                                     |                               |         |
| 4  | 1             | other care provider | face to face consultation                           | emergency appointment         | < 10    |
| 5  |               |                     |                                                     |                               |         |
| 6  | 1             | other care provider | face to face consultation                           | emergency consultation        | < 10    |
| 7  |               |                     |                                                     |                               |         |
| 8  | 1             | other care provider | home visit note                                     | acute visit                   | < 10    |
| 9  |               |                     |                                                     |                               |         |
| 10 | 1             | other care provider | pharmacy consultation                               | awaiting review               | < 10    |
| 11 |               |                     |                                                     |                               |         |
| 12 | 1             | other care provider | residential home visit note                         | residential home              | < 10    |
| 13 |               |                     |                                                     |                               |         |
| 14 | 1             | other care provider | telephone encounter                                 | telephone consultation        | < 10    |
| 15 |               |                     |                                                     |                               |         |
| 16 | 1             | dr                  | group consultation                                  | awaiting review               | < 10    |
| 17 |               |                     |                                                     |                               |         |
| 18 | 1             | gp                  | home visit note                                     | acute visit                   | < 10    |
| 19 |               |                     |                                                     |                               |         |
| 20 | 1             | gp                  | clinic note                                         | follow-up/routine visit       | < 10    |
| 21 |               |                     |                                                     |                               |         |
| 22 | 1             | gp                  | emergency consultation                              | casualty attendance           | < 10    |
| 23 |               |                     |                                                     |                               |         |
| 24 | 1             | gp                  | home visit note                                     | nursing home                  | < 10    |
| 25 |               |                     |                                                     |                               |         |
| 26 | 1             | nurse               | seen in rapid access clinic at gp surgery           | awaiting review               | < 10    |
| 27 |               |                     |                                                     |                               |         |
| 28 | 1             | nurse               | telephone consultation                              | telephone call from a patient | < 10    |
| 29 |               |                     |                                                     |                               |         |
| 30 | 1             | nurse               | twilight visit note                                 | awaiting review               | < 10    |
| 31 |               |                     |                                                     |                               |         |
| 32 | 1             | other care provider | administration note                                 | other                         | < 10    |
| 33 |               |                     |                                                     |                               |         |
| 34 | 1             | other care provider | children's home visit note                          | clinic                        | < 10    |
| 35 |               |                     |                                                     |                               |         |
| 36 | 1             | other care provider | home visit note                                     | awaiting review               | < 10    |
| 37 |               |                     |                                                     |                               |         |
| 38 | 1             | other care provider | twilight visit note                                 | awaiting review               | < 10    |
| 39 |               |                     |                                                     |                               |         |
| 40 | excl. job cat |                     | gp surgery                                          | gp surgery                    | 875,291 |
| 41 |               |                     |                                                     |                               |         |
| 42 | excl. job cat |                     | other note                                          | other                         | 31,332  |
| 43 |               |                     |                                                     |                               |         |
| 44 | excl. job cat |                     | telephone consultation                              | telephone consultation        | 29,455  |
| 45 |               |                     |                                                     |                               |         |
| 46 | excl. job cat |                     | online communication                                | online services message       | 14,055  |
| 47 |               |                     |                                                     |                               |         |
| 48 | excl. job cat |                     | telephone call to a patient                         | telephone call to a patient   | 13,935  |
| 49 |               |                     |                                                     |                               |         |
| 50 | excl. job cat |                     | provision of general practitioner intermediate care | gp surgery                    | 9,791   |
| 51 |               |                     |                                                     |                               |         |
| 52 | excl. job cat |                     | telephone call from a patient                       | telephone call from a patient | 7,098   |
| 53 |               |                     |                                                     |                               |         |
| 54 | excl. job cat |                     | seen in gp unit                                     | gp surgery                    | 6,240   |
| 55 |               |                     |                                                     |                               |         |
| 56 | excl. job cat |                     | home visit note                                     | home visit note               | 4,776   |
| 57 |               |                     |                                                     |                               |         |
| 58 | excl. job cat |                     | routine consultation                                | other                         | 4,248   |
| 59 |               |                     |                                                     |                               |         |
| 60 | excl. job cat |                     | gp surgery                                          | surgery consultation          | 3,047   |
|    |               |                     |                                                     |                               |         |
|    | excl. job cat |                     | home visit note                                     | other                         | 2,664   |
|    |               |                     |                                                     |                               |         |
|    | excl. job cat |                     | face to face consultation                           | face to face consultation     | 2,071   |
|    |               |                     |                                                     |                               |         |
|    | excl. job cat |                     | face to face consultation                           | surgery consultation          | 1,177   |
|    |               |                     |                                                     |                               |         |
|    | excl. job cat |                     | online communication                                | awaiting review               | 1,098   |
|    |               |                     |                                                     |                               |         |
|    | excl. job cat |                     | nursing home visit note                             | nursing home visit note       | 708     |
|    |               |                     |                                                     |                               |         |
|    | excl. job cat |                     | routine consultation                                | surgery consultation          | 509     |
|    |               |                     |                                                     |                               |         |
|    | excl. job cat |                     | consultation via video conference                   | awaiting review               | 494     |
|    |               |                     |                                                     |                               |         |
|    | excl. job cat |                     | routine consultation                                | awaiting review               | 453     |
|    |               |                     |                                                     |                               |         |
|    | excl. job cat |                     | enterprise consultation                             | enterprise consultation       | 398     |
|    |               |                     |                                                     |                               |         |
|    | excl. job cat |                     | administration note                                 | other                         | 376     |
|    |               |                     |                                                     |                               |         |
|    | excl. job cat |                     | telephone encounter                                 | telephone encounter           | 376     |

1  
2  
3  
4  
5  
6  
7  
8  
9  
10  
11  
12  
13  
14  
15  
16  
17  
18  
19  
20  
21  
22  
23  
24  
25  
26  
27  
28  
29  
30  
31  
32  
33  
34  
35  
36  
37  
38  
39  
40  
41  
42  
43  
44  
45  
46  
47  
48  
49  
50  
51  
52  
53  
54  
55  
56  
57  
58  
59  
60

|               |                                               |                               |      |
|---------------|-----------------------------------------------|-------------------------------|------|
| excl. job cat | home visit note                               | awaiting review               | 371  |
| excl. job cat | clinic note                                   | clinic                        | 337  |
| excl. job cat | clinic note                                   | surgery consultation          | 329  |
| excl. job cat | residential home visit note                   | residential home visit note   | 327  |
| excl. job cat | face to face consultation                     | gp surgery                    | 305  |
| excl. job cat | face to face consultation                     | awaiting review               | 293  |
| excl. job cat | home visit note                               | home visit                    | 250  |
| excl. job cat | urgent consultation                           | urgent consultation           | 240  |
| excl. job cat | walk-in clinic                                | walk-in clinic                | 196  |
| excl. job cat | group consultation                            | awaiting review               | 170  |
| excl. job cat | seen in gp unit                               | surgery consultation          | 148  |
| excl. job cat | e-mail consultation                           | awaiting review               | 145  |
| excl. job cat | emergency consultation                        | emergency consultation        | 121  |
| excl. job cat | face to face consultation with relative/carer | awaiting review               | 116  |
| excl. job cat | consultation via multimedia                   | awaiting review               | 75   |
| excl. job cat | seen in gp unit                               | awaiting review               | 75   |
| excl. job cat | children's home visit note                    | awaiting review               | 63   |
| excl. job cat | other note                                    | gp surgery                    | 54   |
| excl. job cat | other consultation medium used                | other                         | 44   |
| excl. job cat | other consultation medium used                | awaiting review               | 42   |
| excl. job cat | extended hours consultation                   | awaiting review               | 37   |
| excl. job cat | gp surgery                                    | face to face consultation     | 36   |
| excl. job cat | emergency appointment                         | emergency appointment         | 35   |
| excl. job cat | gp surgery                                    | clinic                        | 32   |
| excl. job cat | face to face consultation                     | emergency consultation        | 25   |
| excl. job cat | residential home visit note                   | residential home              | 23   |
| excl. job cat | telephone encounter                           | telephone call to a patient   | 23   |
| excl. job cat | night visit note                              | awaiting review               | 14   |
| excl. job cat | home visit note                               | acute visit                   | 13   |
| excl. job cat | walk-in clinic                                | walk-in centre                | 11   |
| excl. job cat | district nurse visit                          | awaiting review               | < 10 |
| excl. job cat | seen in urgent care centre                    | awaiting review               | < 10 |
| excl. job cat | twilight visit note                           | awaiting review               | < 10 |
| excl. job cat | clinic note                                   | gp surgery                    | < 10 |
| excl. job cat | laboratory result                             | acute visit                   | < 10 |
| excl. job cat | telephone consultation                        | telephone call to a patient   | < 10 |
| excl. job cat | walk-in clinic                                | clinic                        | < 10 |
| excl. job cat | telephone encounter                           | telephone call from a patient | < 10 |
| excl. job cat | emergency consultation                        | casualty attendance           | < 10 |
| excl. job cat | pharmacy consultation                         | awaiting review               | < 10 |
| excl. job cat | third party consultation                      | casualty attendance           | < 10 |
| excl. job cat | case conference                               | gp surgery                    | < 10 |
| excl. job cat | emergency consultation                        | awaiting review               | < 10 |
| excl. job cat | gp surgery                                    | main surgery                  | < 10 |
| excl. job cat | home visit note                               | follow-up/routine visit       | < 10 |
| excl. job cat | non-consultation medication data              | casualty attendance           | < 10 |
| excl. job cat | nursing home visit note                       | nursing home                  | < 10 |

|    |               |                     |                                              |                          |           |
|----|---------------|---------------------|----------------------------------------------|--------------------------|-----------|
| 1  |               |                     |                                              |                          |           |
| 2  |               |                     |                                              |                          |           |
| 3  | excl. job cat |                     | remote consultation                          | awaiting review          | < 10      |
| 4  | excl. job cat |                     | same day appointment                         | same day appointment     | < 10      |
| 5  | excl. job cat |                     | school visit note                            | awaiting review          | < 10      |
| 6  | excl. job cat |                     | telephone consultation                       | awaiting review          | < 10      |
| 7  | excl. job cat |                     | telephone encounter                          | telephone consultation   | < 10      |
| 8  | excl. job cat |                     | third party consultation                     | awaiting review          | < 10      |
| 9  |               |                     |                                              |                          |           |
| 10 | 0             | gp                  | externally entered note                      | externally entered       | 3,467,397 |
| 11 | 0             |                     | scanned document                             | docman                   | 3,183,781 |
| 12 | 0             |                     | administration note                          | administration note      | 968,767   |
| 13 | 0             |                     |                                              |                          | 737,843   |
| 14 | 0             |                     | scanned document                             | scanned document         | 727,269   |
| 15 | 0             | gp                  | administration note                          | administration note      | 725,612   |
| 16 | 0             |                     | inbound document                             | inbound document         | 402,647   |
| 17 | 0             |                     | awaiting clinical code migration to emis web | awaiting review          | 385,598   |
| 18 | 0             | nurse               | externally entered note                      | externally entered       | 303,830   |
| 19 | 0             | gp                  | awaiting clinical code migration to emis web | awaiting review          | 261,627   |
| 20 | 0             |                     | administration note                          | administration           | 256,604   |
| 21 | 0             | other care provider | scanned document                             | docman                   | 255,022   |
| 22 | 0             |                     | externally entered note                      | externally entered       | 252,167   |
| 23 | 0             | gp                  |                                              |                          | 208,462   |
| 24 | 0             | gp                  | outbound referral                            | outbound referral        | 197,534   |
| 25 | 0             | gp                  | awaiting clinical code migration to emis web | gp surgery               | 162,048   |
| 26 | 0             | other care provider | administration note                          | administration note      | 160,918   |
| 27 | 0             |                     | awaiting clinical code migration to emis web | third party consultation | 147,374   |
| 28 | 0             | gp                  | scanned document                             | scanned document         | 145,355   |
| 29 | 0             |                     | awaiting clinical code migration to emis web | gp surgery               | 127,041   |
| 30 | 0             | gp                  | awaiting clinical code migration to emis web | results recording        | 122,118   |
| 31 | 0             |                     | awaiting clinical code migration to emis web | other                    | 121,401   |
| 32 | 0             | gp                  | awaiting clinical code migration to emis web | surgery consultation     | 107,304   |
| 33 | 0             |                     | awaiting clinical code migration to emis web |                          | 104,693   |
| 34 | 0             | gp                  | inbound document                             | inbound document         | 102,534   |
| 35 | 0             | nurse               | awaiting clinical code migration to emis web | awaiting review          | 94,158    |
| 36 | 0             | other care provider | awaiting clinical code migration to emis web | gp surgery               | 86,398    |
| 37 | 0             | other care provider | awaiting clinical code migration to emis web | awaiting review          | 85,745    |
| 38 | 0             | nurse               | administration note                          | administration note      | 84,051    |
| 39 | 0             | gp                  | awaiting clinical code migration to emis web |                          | 77,585    |
| 40 | 0             | nurse               | awaiting clinical code migration to emis web | gp surgery               | 75,552    |

|    |   |                     |                                              |        |
|----|---|---------------------|----------------------------------------------|--------|
| 1  |   |                     |                                              |        |
| 2  |   |                     |                                              |        |
| 3  |   |                     |                                              |        |
| 4  | 0 | other care provider |                                              | 66,366 |
| 5  | 0 | other care provider | externally entered note                      | 62,810 |
| 6  | 0 |                     | externally entered note                      | 61,848 |
| 7  | 0 |                     | externally entered note                      | 61,848 |
| 8  | 0 |                     | awaiting clinical code migration to emis web | 61,683 |
| 9  | 0 | nurse               |                                              | 58,019 |
| 10 | 0 | gp                  | telephone triage encounter                   | 50,662 |
| 11 | 0 |                     | third party consultation                     | 44,609 |
| 12 | 0 | other care provider | scanned document                             | 38,341 |
| 13 | 0 | nurse               | awaiting clinical code migration to emis web | 35,376 |
| 14 | 0 | nurse               | awaiting clinical code migration to emis web | 27,699 |
| 15 | 0 | gp                  | administration note                          | 27,390 |
| 16 | 0 | gp                  | awaiting clinical code migration to emis web | 26,214 |
| 17 | 0 | gp                  | awaiting clinical code migration to emis web | 26,204 |
| 18 | 0 |                     | awaiting clinical code migration to emis web | 25,627 |
| 19 | 0 |                     | awaiting clinical code migration to emis web | 24,458 |
| 20 | 0 |                     | gp surgery                                   | 24,337 |
| 21 | 0 |                     | awaiting clinical code migration to emis web | 24,311 |
| 22 | 0 | gp                  | third party consultation                     | 23,952 |
| 23 | 0 |                     | awaiting clinical code migration to emis web | 22,515 |
| 24 | 0 | gp                  | laboratory result                            | 22,066 |
| 25 | 0 | gp                  | externally entered note                      | 20,864 |
| 26 | 0 | gp                  | awaiting clinical code migration to emis web | 20,729 |
| 27 | 0 | other care provider | inbound document                             | 20,159 |
| 28 | 0 | gp                  | telephone call to relative/carer             | 19,234 |
| 29 | 0 | other care provider | awaiting clinical code migration to emis web | 17,081 |
| 30 | 0 |                     | awaiting clinical code migration to emis web | 15,972 |
| 31 | 0 | nurse               | awaiting clinical code migration to emis web | 15,892 |
| 32 | 0 | gp                  | other note                                   | 15,816 |
| 33 | 0 | gp                  | gp surgery                                   | 15,810 |
| 34 | 0 | gp                  | discussion with colleague                    | 12,973 |
| 35 | 0 | gp                  | awaiting clinical code migration to emis web | 11,782 |
| 36 | 0 |                     | repeat prescription                          | 11,542 |
| 37 | 0 | other care provider | administration note                          | 11,037 |
| 38 | 0 | nurse               | awaiting clinical code migration to emis web | 11,008 |
| 39 | 0 |                     | other                                        | 11,008 |

|   |                     |                                              |                                    |        |
|---|---------------------|----------------------------------------------|------------------------------------|--------|
| 0 |                     | hospital outpatient report                   | hospital outpatient report         | 10,033 |
| 0 | nurse               | inbound document                             | inbound document                   | 9,304  |
| 0 | nurse               | scanned document                             | scanned document                   | 7,878  |
| 0 | other care provider | awaiting clinical code migration to emis web | repeat issue                       | 7,745  |
| 0 | gp                  | awaiting clinical code migration to emis web | outbound referral                  | 7,402  |
| 0 | other care provider | externally entered note                      | externally entered note            | 6,736  |
| 0 | gp                  | telephone call from relative/carer           | telephone call from relative/carer | 6,626  |
| 0 | other care provider | awaiting clinical code migration to emis web | surgery consultation               | 6,514  |
| 0 |                     | awaiting clinical code migration to emis web | inbound document                   | 6,495  |
| 0 | nurse               | gp surgery                                   | awaiting review                    | 6,475  |
| 0 | other care provider | awaiting clinical code migration to emis web | other                              | 6,315  |
| 0 | nurse               | administration note                          | administration                     | 6,285  |
| 0 |                     | outbound referral                            | outbound referral                  | 6,194  |
| 0 | nurse               | telephone triage encounter                   | telephone triage encounter         | 6,074  |
| 0 | gp                  | clinic note                                  | clinic note                        | 5,834  |
| 0 | gp                  | awaiting clinical code migration to emis web | repeat issue                       | 5,803  |
| 0 | gp                  | non-consultation data                        | non-consultation data              | 5,552  |
| 0 | other care provider | third party consultation                     | third party consultation           | 5,505  |
| 0 | other care provider | gp surgery                                   | awaiting review                    | 5,332  |
| 0 | gp                  | awaiting clinical code migration to emis web | telephone call from a patient      | 5,282  |
| 0 | nurse               | externally entered note                      | externally entered note            | 5,251  |
| 0 | gp                  | face to face consultation                    | triage                             | 5,196  |
| 0 | nurse               | telephone call to relative/carer             | telephone call to relative/carer   | 5,191  |
| 0 |                     | awaiting clinical code migration to emis web | mail to patient                    | 5,178  |
| 0 |                     | non-consultation data                        | non-consultation data              | 4,933  |
| 0 | gp                  | e-mail received from patient                 | e-mail received from patient       | 4,877  |
| 0 | nurse               | outbound referral                            | outbound referral                  | 4,787  |
| 0 |                     | medication requested                         | repeat issue                       | 4,639  |
| 0 | nurse               | third party consultation                     | third party consultation           | 4,605  |
| 0 | nurse               | awaiting clinical code migration to emis web | results recording                  | 4,405  |
| 0 | gp                  | awaiting clinical code migration to emis web | scanned document                   | 4,384  |
| 0 |                     | other note                                   | other note                         | 4,375  |
| 0 |                     | awaiting clinical code migration to emis web | mjog                               | 4,221  |
| 0 | other care provider | other note                                   | other note                         | 4,071  |
| 0 |                     | mail to patient                              | mail to patient                    | 3,924  |
| 0 | other care provider | awaiting clinical code migration to emis web | clinic                             | 3,859  |
| 0 |                     | e-mail received from patient                 | e-mail received from patient       | 3,632  |



|    |   |                     |                                              |                                    |       |
|----|---|---------------------|----------------------------------------------|------------------------------------|-------|
| 1  |   |                     | awaiting clinical code migration to emis web |                                    |       |
| 2  |   |                     |                                              |                                    |       |
| 3  |   |                     |                                              |                                    |       |
| 4  | 0 |                     | awaiting clinical code migration to emis web | out of hours, non practice         | 3,607 |
| 5  |   | other care provider | clinic note                                  | clinic note                        | 3,371 |
| 6  | 0 |                     | awaiting clinical code migration to emis web | home visit note                    | 3,370 |
| 7  |   | gp                  | hospital outpatient report                   | hospital outpatient report         | 3,359 |
| 8  | 0 | gp                  | awaiting clinical code migration to emis web | clinic                             | 3,245 |
| 9  |   | nurse               | nurse telephone triage                       | nurse telephone triage             | 3,274 |
| 10 | 0 | nurse               | clinic note                                  | clinic note                        | 3,252 |
| 11 |   | gp                  | awaiting clinical code migration to emis web | administration note                | 3,044 |
| 12 | 0 | other care provider | awaiting clinical code migration to emis web | third party consultation           | 3,038 |
| 13 |   | gp                  | awaiting clinical code migration to emis web | medicine management                | 2,829 |
| 14 | 0 | other care provider | awaiting clinical code migration to emis web | telephone call to relative/carer   | 2,807 |
| 15 |   | other care provider | telephone call to relative/carer             | telephone call to relative/carer   | 2,807 |
| 16 | 0 | nurse               | awaiting clinical code migration to emis web | telephone consultation             | 2,782 |
| 17 |   |                     | awaiting clinical code migration to emis web | clinic                             | 2,775 |
| 18 | 0 |                     | laboratory result                            | laboratory result                  | 2,727 |
| 19 |   | gp                  | awaiting clinical code migration to emis web | inbound document                   | 2,605 |
| 20 | 0 |                     | telephone call from relative/carer           | telephone call from relative/carer | 2,594 |
| 21 |   |                     | clinic note                                  | clinic note                        | 2,579 |
| 22 | 0 | gp                  | laboratory result                            | laboratory result                  | 2,511 |
| 23 |   | other care provider | repeat prescription                          | repeat issue                       | 2,511 |
| 24 | 0 |                     | awaiting clinical code migration to emis web | home of patient                    | 2,454 |
| 25 |   | gp                  | awaiting clinical code migration to emis web | out of hours, non practice         | 2,365 |
| 26 | 0 | gp                  | awaiting clinical code migration to emis web | nhs direct report                  | 2,334 |
| 27 |   |                     | awaiting clinical code migration to emis web | results recording                  | 2,185 |
| 28 | 0 | dr                  | third party consultation                     | third party consultation           | 2,146 |
| 29 |   | other care provider | awaiting clinical code migration to emis web | third party consultation           | 2,095 |
| 30 | 0 | nurse               | awaiting clinical code migration to emis web | administration note                | 2,075 |
| 31 |   |                     | administration note                          | patientchase insert                | 1,855 |
| 32 | 0 |                     | clinic note                                  | awaiting review                    | 1,790 |
| 33 |   |                     | hospital inpatient report                    | hospital inpatient report          | 1,760 |
| 34 | 0 |                     | e-mail received from patient                 | docman                             | 1,753 |
| 35 |   | nurse               | other note                                   | other note                         | 1,708 |
| 36 | 0 | nurse               | non-consultation data                        | non-consultation data              | 1,681 |
| 37 |   | gp                  | awaiting clinical code migration to emis web | referral letter                    | 1,660 |
| 38 | 0 |                     | laboratory result                            | results recording                  | 1,624 |

|   |                     |                                              |                                    |       |
|---|---------------------|----------------------------------------------|------------------------------------|-------|
| 0 |                     | awaiting clinical code migration to emis web | non-consultation data              | 1,537 |
| 0 | gp                  | awaiting clinical code migration to emis web | medicine management                | 1,510 |
| 0 | nurse               | laboratory result                            | results recording                  | 1,464 |
| 0 | nurse               | telephone call from relative/carer           | telephone call from relative/carer | 1,401 |
| 0 |                     | administration note                          | scanned document                   | 1,373 |
| 0 |                     | telephone triage encounter                   | telephone triage encounter         | 1,353 |
| 0 | gp                  | medication requested                         | awaiting review                    | 1,347 |
| 0 | nurse               | discussion with colleague                    | discussion with colleague          | 1,329 |
| 0 | gp                  | awaiting clinical code migration to emis web | telephone triage encounter         | 1,313 |
| 0 | nurse               | awaiting clinical code migration to emis web | telephone call to a patient        | 1,243 |
| 0 | other care provider | non-consultation data                        | non-consultation data              | 1,239 |
| 0 | gp                  | case conference                              | awaiting review                    | 1,225 |
| 0 | gp                  | awaiting clinical code migration to emis web | externally entered note            | 1,206 |
| 0 |                     | telephone call to relative/carer             | telephone call to relative/carer   | 1,191 |
| 0 | nurse               | awaiting clinical code migration to emis web | third party consultation           | 1,170 |
| 0 | gp                  | e-mail sent to patient                       | awaiting review                    | 1,162 |
| 0 | dr                  | administration note                          | administration                     | 1,159 |
| 0 |                     | other note                                   |                                    | 1,156 |
| 0 |                     | administration note                          |                                    | 1,120 |
| 0 | dr                  | externally entered note                      | externally entered                 | 1,113 |
| 0 | gp                  | awaiting clinical code migration to emis web | face to face consultation          | 1,112 |
| 0 | other care provider | telephone triage encounter                   | telephone triage encounter         | 1,107 |
| 0 | nurse               | laboratory result                            | laboratory result                  | 1,064 |
| 0 | other care provider | outbound referral                            | outbound referral                  | 1,052 |
| 0 | gp                  | clinic note                                  | awaiting review                    | 1,030 |
| 0 | other care provider | mail to patient                              | patientchase insert                | 1,019 |
| 0 | gp                  | repeat prescription                          | awaiting review                    | 1,003 |
| 0 | gp                  | awaiting clinical code migration to emis web | data transferred from other system | 983   |
| 0 |                     | awaiting clinical code migration to emis web | non-consultation medication data   | 980   |
| 0 | gp                  | awaiting clinical code migration to emis web | nursing home visit note            | 971   |
| 0 | gp                  | repeat prescription                          | repeat issue                       | 964   |
| 0 |                     | awaiting clinical code migration to emis web | telephone call to a patient        | 901   |
| 0 | dr                  |                                              |                                    | 885   |
| 0 | nurse               | awaiting clinical code migration to emis web | face to face consultation          | 853   |
| 0 | other care provider | hospital outpatient report                   | hospital outpatient report         | 828   |
| 0 |                     | clinic note                                  | community clinic                   | 823   |

|    |   |                     |                                              |                                    |     |
|----|---|---------------------|----------------------------------------------|------------------------------------|-----|
| 1  |   |                     | awaiting clinical code migration to emis web |                                    |     |
| 2  |   |                     |                                              |                                    |     |
| 3  |   |                     |                                              |                                    |     |
| 4  | 0 |                     | awaiting clinical code migration to emis web | gp2gp import                       | 822 |
| 5  |   |                     | awaiting clinical code migration to emis web |                                    |     |
| 6  | 0 |                     | awaiting clinical code migration to emis web | letter from outpatients            | 809 |
| 7  |   | other care provider | mail to patient                              | mail to patient                    |     |
| 8  | 0 | other care provider | mail to patient                              | mail to patient                    | 801 |
| 9  |   | other care provider | telephone call from relative/carer           | telephone call from relative/carer |     |
| 10 | 0 | other care provider | telephone call from relative/carer           | telephone call from relative/carer | 789 |
| 11 |   |                     | awaiting clinical code migration to emis web |                                    |     |
| 12 | 0 |                     | awaiting clinical code migration to emis web | externally entered note            | 769 |
| 13 |   |                     | awaiting clinical code migration to emis web |                                    |     |
| 14 | 0 |                     | awaiting clinical code migration to emis web | referral letter                    | 751 |
| 15 |   | other care provider | awaiting clinical code migration to emis web |                                    |     |
| 16 | 0 | other care provider | awaiting clinical code migration to emis web | inbound document                   | 719 |
| 17 |   |                     | e-mail sent to patient                       | awaiting review                    |     |
| 18 | 0 |                     | e-mail sent to patient                       | awaiting review                    | 711 |
| 19 | 0 | gp                  | hospital inpatient report                    | hospital inpatient report          | 710 |
| 20 |   | nurse               | awaiting clinical code migration to emis web |                                    |     |
| 21 | 0 | nurse               | awaiting clinical code migration to emis web | repeat issue                       | 694 |
| 22 |   | gp                  | awaiting clinical code migration to emis web |                                    |     |
| 23 | 0 | gp                  | awaiting clinical code migration to emis web | acute visit                        | 693 |
| 24 |   | gp                  | awaiting clinical code migration to emis web |                                    |     |
| 25 | 0 | gp                  | awaiting clinical code migration to emis web | telephone call to relative/carer   | 680 |
| 26 |   |                     | non-consultation medication data             | repeat issue                       |     |
| 27 | 0 | nurse               | awaiting clinical code migration to emis web | repeat issue                       | 679 |
| 28 |   | nurse               | awaiting clinical code migration to emis web | home visit note                    |     |
| 29 | 0 | other care provider | discussion with colleague                    | discussion with colleague          | 672 |
| 30 |   | other care provider | discussion with colleague                    | discussion with colleague          |     |
| 31 | 0 |                     | administration note                          | docman                             | 665 |
| 32 |   | gp                  | administration note                          | docman                             |     |
| 33 | 0 | gp                  | other note                                   |                                    | 665 |
| 34 |   |                     | awaiting clinical code migration to emis web |                                    |     |
| 35 | 0 |                     | awaiting clinical code migration to emis web | telephone consultation             | 661 |
| 36 |   | other care provider | awaiting clinical code migration to emis web |                                    |     |
| 37 | 0 | other care provider | awaiting clinical code migration to emis web | scanned document                   | 656 |
| 38 |   |                     | ooh report                                   | third party consultation           |     |
| 39 | 0 | gp                  | ooh report                                   | third party consultation           | 642 |
| 40 |   | gp                  | scanned document                             | externally entered                 |     |
| 41 | 0 | gp                  | scanned document                             | externally entered                 | 637 |
| 42 |   | gp                  | medication requested                         | repeat issue                       |     |
| 43 | 0 | nurse               | awaiting clinical code migration to emis web | repeat issue                       | 619 |
| 44 |   | nurse               | awaiting clinical code migration to emis web | telephone triage encounter         |     |
| 45 | 0 | other care provider | awaiting clinical code migration to emis web | telephone triage encounter         | 606 |
| 46 |   | other care provider | awaiting clinical code migration to emis web | telephone call to a patient        |     |
| 47 | 0 | other care provider | awaiting clinical code migration to emis web | telephone call to a patient        | 602 |
| 48 |   | other care provider | awaiting clinical code migration to emis web | face to face consultation          |     |
| 49 | 0 | dr                  | administration note                          | face to face consultation          | 541 |
| 50 |   | dr                  | administration note                          | administration note                |     |
| 51 | 0 | gp                  | discussion with other professional           | administration note                | 534 |
| 52 |   | gp                  | discussion with other professional           | awaiting review                    |     |
| 53 | 0 | gp                  | discussion with other professional           | awaiting review                    | 525 |
| 54 |   | gp                  | administration note                          | awaiting review                    |     |
| 55 | 0 | other care provider | awaiting clinical code migration to emis web | awaiting review                    | 514 |
| 56 |   | other care provider | awaiting clinical code migration to emis web | mail to patient                    |     |
| 57 | 0 | other care provider | awaiting clinical code migration to emis web | mail to patient                    | 509 |
| 58 |   |                     | ooh report                                   | awaiting review                    |     |
| 59 | 0 | dr                  | awaiting clinical code migration to emis web | awaiting review                    | 507 |
| 60 |   | dr                  | awaiting clinical code migration to emis web | gp surgery                         |     |
|    | 0 |                     | walk-in clinic                               | gp surgery                         | 504 |
|    |   |                     | walk-in clinic                               |                                    |     |
|    | 0 |                     | walk-in clinic                               |                                    | 501 |
|    |   |                     | administration note                          | inbound document                   |     |
|    | 0 |                     | administration note                          | inbound document                   | 495 |
|    |   |                     | routine consultation                         | repeat issue                       |     |
|    | 0 |                     | routine consultation                         | repeat issue                       | 493 |
|    |   |                     | routine consultation                         | repeat issue                       |     |
|    | 0 |                     | routine consultation                         | repeat issue                       | 488 |

|    |   |                     |                                              |                                    |     |
|----|---|---------------------|----------------------------------------------|------------------------------------|-----|
| 1  |   |                     | awaiting clinical code migration to emis web |                                    |     |
| 2  | 0 |                     | awaiting clinical code migration to emis web | telephone call from a patient      | 486 |
| 3  | 0 | gp                  | ooh report                                   | out of hours, non practice         | 478 |
| 4  | 0 | gp                  | mail from patient                            | mail from patient                  | 473 |
| 5  | 0 |                     | other note                                   | awaiting review                    | 472 |
| 6  | 0 | gp                  | awaiting clinical code migration to emis web | enterprise consultation            | 458 |
| 7  | 0 | other care provider | repeat prescription                          | awaiting review                    | 455 |
| 8  | 0 | gp                  | awaiting clinical code migration to emis web | discussion with colleague          | 451 |
| 9  | 0 |                     | awaiting clinical code migration to emis web | outbound referral                  | 450 |
| 10 | 0 | gp                  | awaiting clinical code migration to emis web | nursing home                       | 447 |
| 11 | 0 | dr                  | awaiting clinical code migration to emis web | awaiting review                    | 444 |
| 12 | 0 | nurse               | e-mail received from patient                 | e-mail received from patient       | 443 |
| 13 | 0 |                     | awaiting clinical code migration to emis web | data transferred from other system | 442 |
| 14 | 0 | nurse               | ooh report                                   | awaiting review                    | 439 |
| 15 | 0 |                     | administration note                          | awaiting review                    | 436 |
| 16 | 0 | other care provider | clinic note                                  | awaiting review                    | 431 |
| 17 | 0 | gp                  | administration note                          |                                    | 415 |
| 18 | 0 | gp                  | administration note                          | scanned document                   | 414 |
| 19 | 0 | gp                  | awaiting clinical code migration to emis web | urgent consultation                | 404 |
| 20 | 0 | other care provider | awaiting clinical code migration to emis web | externally entered note            | 385 |
| 21 | 0 |                     | awaiting clinical code migration to emis web | school                             | 384 |
| 22 | 0 | nurse               | hospital outpatient report                   | hospital outpatient report         | 380 |
| 23 | 0 |                     | mail to patient                              | patientchase insert                | 377 |
| 24 | 0 |                     | awaiting clinical code migration to emis web | telephone encounter                | 376 |
| 25 | 0 | gp                  | administration note                          | results recording                  | 372 |
| 26 | 0 |                     | discussion with colleague                    | discussion with colleague          | 368 |
| 27 | 0 | other care provider | awaiting clinical code migration to emis web | results recording                  | 365 |
| 28 | 0 |                     | case conference                              | awaiting review                    | 361 |
| 29 | 0 | other care provider | awaiting clinical code migration to emis web | telephone consultation             | 350 |
| 30 | 0 | other care provider | awaiting clinical code migration to emis web | patientchase insert                | 345 |
| 31 | 0 |                     | sms text message sent to patient             | patientchase insert                | 345 |
| 32 | 0 | nurse               | mail to patient                              | mail to patient                    | 342 |
| 33 | 0 |                     | awaiting clinical code migration to emis web | hospital outpatient report         | 336 |
| 34 | 0 |                     | gp surgery                                   |                                    | 315 |
| 35 | 0 | gp                  | ooh report                                   | nhs direct report                  | 314 |
| 36 | 0 | gp                  | administration note                          | referral letter                    | 313 |
| 37 | 0 | dr                  | awaiting clinical code migration to emis web |                                    | 310 |

|    |   |                     |                                              |                                    |     |
|----|---|---------------------|----------------------------------------------|------------------------------------|-----|
| 1  |   |                     |                                              |                                    |     |
| 2  |   |                     |                                              |                                    |     |
| 3  |   |                     |                                              |                                    |     |
| 4  | 0 | gp                  | awaiting clinical code migration to emis web | telephone call from relative/carer | 310 |
| 5  |   |                     |                                              |                                    |     |
| 6  | 0 | gp                  | awaiting clinical code migration to emis web | non-consultation data              | 309 |
| 7  |   |                     |                                              |                                    |     |
| 8  | 0 | nurse               | awaiting clinical code migration to emis web | telephone call from a patient      | 309 |
| 9  |   |                     |                                              |                                    |     |
| 10 | 0 | other care provider | awaiting clinical code migration to emis web | non-consultation data              | 306 |
| 11 |   |                     |                                              |                                    |     |
| 12 | 0 | other care provider | e-mail received from patient                 | e-mail received from patient       | 292 |
| 13 |   |                     |                                              |                                    |     |
| 14 | 0 | other care provider | awaiting clinical code migration to emis web | non-consultation medication data   | 289 |
| 15 |   |                     |                                              |                                    |     |
| 16 | 0 | nurse               | clinic note                                  | awaiting review                    | 286 |
| 17 |   |                     |                                              |                                    |     |
| 18 | 0 |                     | scanned document                             | scanned document                   | 285 |
| 19 |   |                     |                                              |                                    |     |
| 20 | 0 |                     | ooh report                                   | out of hours, non practice         | 283 |
| 21 |   |                     |                                              |                                    |     |
| 22 | 0 | other care provider | laboratory result                            | laboratory result                  | 282 |
| 23 |   |                     |                                              |                                    |     |
| 24 | 0 | gp                  | awaiting clinical code migration to emis web | discharge details                  | 281 |
| 25 |   |                     |                                              |                                    |     |
| 26 | 0 |                     | home visit note                              | home of patient                    | 277 |
| 27 |   |                     |                                              |                                    |     |
| 28 | 0 | nurse               | awaiting clinical code migration to emis web | inbound document                   | 276 |
| 29 |   |                     |                                              |                                    |     |
| 30 | 0 | other care provider | hospital inpatient report                    | hospital inpatient report          | 275 |
| 31 |   |                     |                                              |                                    |     |
| 32 | 0 | gp                  | mail to patient                              | mail to patient                    | 270 |
| 33 |   |                     |                                              |                                    |     |
| 34 | 0 | gp                  | awaiting clinical code migration to emis web | residential home visit note        | 266 |
| 35 |   |                     |                                              |                                    |     |
| 36 | 0 | other care provider | administration note                          | awaiting review                    | 265 |
| 37 |   |                     |                                              |                                    |     |
| 38 | 0 |                     | awaiting clinical code migration to emis web | acute visit                        | 263 |
| 39 |   |                     |                                              |                                    |     |
| 40 | 0 |                     | walk-in clinic                               | awaiting review                    | 260 |
| 41 |   |                     |                                              |                                    |     |
| 42 | 0 | dr                  | hospital outpatient report                   | hospital outpatient report         | 256 |
| 43 |   |                     |                                              |                                    |     |
| 44 | 0 | gp                  | awaiting clinical code migration to emis web | mail to patient                    | 249 |
| 45 |   |                     |                                              |                                    |     |
| 46 | 0 |                     | administration note                          | mjog                               | 248 |
| 47 |   |                     |                                              |                                    |     |
| 48 | 0 |                     | mail from patient                            | mail from patient                  | 248 |
| 49 |   |                     |                                              |                                    |     |
| 50 | 0 | gp                  | awaiting clinical code migration to emis web | letter from outpatients            | 247 |
| 51 |   |                     |                                              |                                    |     |
| 52 | 0 |                     | awaiting clinical code migration to emis web | discharge details                  | 244 |
| 53 |   |                     |                                              |                                    |     |
| 54 | 0 | nurse               | awaiting clinical code migration to emis web | mail to patient                    | 243 |
| 55 |   |                     |                                              |                                    |     |
| 56 | 0 | other care provider | awaiting clinical code migration to emis web | home visit note                    | 236 |
| 57 |   |                     |                                              |                                    |     |
| 58 | 0 | gp                  | home visit note                              | results recording                  | 235 |
| 59 |   |                     |                                              |                                    |     |
| 60 | 0 | dr                  | inbound document                             | inbound document                   | 234 |
|    |   |                     |                                              |                                    |     |
|    | 0 | gp                  | awaiting clinical code migration to emis web | other note                         | 230 |
|    |   |                     |                                              |                                    |     |
|    | 0 | gp                  | awaiting clinical code migration to emis web | patientchase insert                | 229 |
|    |   |                     |                                              |                                    |     |
|    | 0 | dr                  | awaiting clinical code migration to emis web | administration note                | 225 |
|    |   |                     |                                              |                                    |     |
|    | 0 | gp                  | awaiting clinical code migration to emis web | open door surgery                  | 222 |

|   |                     |                                                |                                    |     |
|---|---------------------|------------------------------------------------|------------------------------------|-----|
| 0 |                     | awaiting clinical code migration to emis web   | nhs direct report                  | 222 |
| 0 | other care provider | awaiting clinical code migration to emis web   | touchscreen                        | 216 |
| 0 | gp                  | scanned document                               | docman                             | 213 |
| 0 | nurse               | awaiting clinical code migration to emis web   | nursing home visit note            | 210 |
| 0 | nurse               | administration note                            |                                    | 209 |
| 0 | nurse               | awaiting clinical code migration to emis web   | externally entered note            | 209 |
| 0 |                     | awaiting clinical code migration to emis web   | laboratory result                  | 199 |
| 0 |                     | hospital outpatient report                     | hospital                           | 197 |
| 0 | other care provider | non-consultation medication data               | repeat issue                       | 196 |
| 0 | other care provider | awaiting clinical code migration to emis web   | referral letter                    | 195 |
| 0 | nurse               | e-mail sent to patient                         | awaiting review                    | 191 |
| 0 | nurse               | awaiting clinical code migration to emis web   | referral letter                    | 190 |
| 0 | dr                  | awaiting clinical code migration to emis web   | telephone consultation             | 186 |
| 0 | nurse               | case conference                                | awaiting review                    | 185 |
| 0 | other care provider | awaiting clinical code migration to emis web   | data transferred from other system | 184 |
| 0 | gp                  | multidisciplinary team meeting without patient | awaiting review                    | 179 |
| 0 | gp                  | awaiting clinical code migration to emis web   | clinic note                        | 176 |
| 0 | other care provider | awaiting clinical code migration to emis web   | mjog                               | 175 |
| 0 |                     | awaiting clinical code migration to emis web   | hospital inpatient report          | 168 |
| 0 |                     | awaiting clinical code migration to emis web   | home visit note                    | 164 |
| 0 |                     | awaiting clinical code migration to emis web   | online services message            | 163 |
| 0 | other care provider | administration note                            |                                    | 162 |
| 0 | nurse               | awaiting clinical code migration to emis web   | outbound referral                  | 159 |
| 0 | other care provider | ooh report                                     | awaiting review                    | 156 |
| 0 | gp                  | awaiting clinical code migration to emis web   | non-consultation medication data   | 152 |
| 0 | nurse               | awaiting clinical code migration to emis web   | telephone call to relative/carer   | 152 |
| 0 | other care provider | other note                                     | awaiting review                    | 149 |
| 0 | dr                  | awaiting clinical code migration to emis web   | surgery consultation               | 148 |
| 0 | nurse               | awaiting clinical code migration to emis web   | scanned document                   | 146 |
| 0 | gp                  | administration note                            | repeat issue                       | 145 |
| 0 |                     | awaiting clinical code migration to emis web   | open door surgery                  | 144 |

|    |   |                     |                                                     |                                    |     |
|----|---|---------------------|-----------------------------------------------------|------------------------------------|-----|
| 1  |   |                     |                                                     |                                    |     |
| 2  |   |                     |                                                     |                                    |     |
| 3  |   |                     |                                                     |                                    |     |
| 4  | 0 | other care provider | awaiting clinical code migration to emis web        | clinic note                        | 140 |
| 5  | 0 |                     | inbound referral                                    | awaiting review                    | 138 |
| 6  |   |                     | awaiting clinical code migration to emis web        | clinic note                        | 133 |
| 7  | 0 |                     | awaiting clinical code migration to emis web        | clinic note                        | 133 |
| 8  |   |                     | awaiting clinical code migration to emis web        | face to face consultation          | 129 |
| 9  | 0 |                     | awaiting clinical code migration to emis web        | face to face consultation          | 129 |
| 10 |   |                     | awaiting clinical code migration to emis web        | face to face consultation          | 129 |
| 11 | 0 | other care provider | non-consultation medication data                    | non-consultation medication data   | 124 |
| 12 |   |                     | awaiting clinical code migration to emis web        | non-consultation medication data   | 124 |
| 13 | 0 | nurse               | awaiting clinical code migration to emis web        | residential home visit note        | 122 |
| 14 |   |                     | awaiting clinical code migration to emis web        | residential home visit note        | 122 |
| 15 | 0 | nurse               | awaiting clinical code migration to emis web        | data transferred from other system | 121 |
| 16 |   |                     | awaiting clinical code migration to emis web        | data transferred from other system | 121 |
| 17 | 0 | other care provider | e-mail sent to patient                              | awaiting review                    | 121 |
| 18 |   |                     | e-mail sent to patient                              | awaiting review                    | 121 |
| 19 | 0 | gp                  | administration note                                 | outbound referral                  | 118 |
| 20 |   |                     | administration note                                 | outbound referral                  | 118 |
| 21 | 0 | nurse               | other note                                          |                                    | 117 |
| 22 |   |                     | other note                                          |                                    | 117 |
| 23 | 0 | nurse               | awaiting clinical code migration to emis web        | nurse telephone triage             | 116 |
| 24 |   |                     | awaiting clinical code migration to emis web        | nurse telephone triage             | 116 |
| 25 | 0 |                     | awaiting clinical code migration to emis web        | accident & emergency               | 116 |
| 26 |   |                     | awaiting clinical code migration to emis web        | accident & emergency               | 116 |
| 27 | 0 | gp                  | other consultation medium used                      | data transferred from other system | 109 |
| 28 |   |                     | other consultation medium used                      | data transferred from other system | 109 |
| 29 | 0 |                     | non-consultation medication data                    | non-consultation medication data   | 108 |
| 30 |   |                     | non-consultation medication data                    | non-consultation medication data   | 108 |
| 31 | 0 | nurse               | face to face consultation                           | triage                             | 104 |
| 32 |   |                     | face to face consultation                           | triage                             | 104 |
| 33 | 0 | other care provider | awaiting clinical code migration to emis web        | acute visit                        | 102 |
| 34 |   |                     | awaiting clinical code migration to emis web        | acute visit                        | 102 |
| 35 | 0 | nurse               | awaiting clinical code migration to emis web        | telephone call from relative/carer | 100 |
| 36 |   |                     | awaiting clinical code migration to emis web        | telephone call from relative/carer | 100 |
| 37 | 0 |                     | extended hours consultation                         | out of hours, non practice         | 100 |
| 38 |   |                     | extended hours consultation                         | out of hours, non practice         | 100 |
| 39 | 0 | nurse               | mail from patient                                   | mail from patient                  | 98  |
| 40 |   |                     | mail from patient                                   | mail from patient                  | 98  |
| 41 | 0 | other care provider | hospital outpatient report                          | hospital                           | 97  |
| 42 |   |                     | hospital outpatient report                          | hospital                           | 97  |
| 43 | 0 | dr                  | awaiting clinical code migration to emis web        | nursing home visit note            | 96  |
| 44 |   |                     | awaiting clinical code migration to emis web        | nursing home visit note            | 96  |
| 45 | 0 |                     | nurse telephone triage                              | nurse telephone triage             | 94  |
| 46 |   |                     | nurse telephone triage                              | nurse telephone triage             | 94  |
| 47 | 0 | nurse               | hospital inpatient report                           | hospital inpatient report          | 93  |
| 48 |   |                     | hospital inpatient report                           | hospital inpatient report          | 93  |
| 49 | 0 | other care provider | case conference                                     | awaiting review                    | 92  |
| 50 |   |                     | case conference                                     | awaiting review                    | 92  |
| 51 | 0 | gp                  | provision of general practitioner intermediate care | awaiting review                    | 91  |
| 52 |   |                     | provision of general practitioner intermediate care | awaiting review                    | 91  |
| 53 | 0 | gp                  | walk-in clinic                                      |                                    | 91  |
| 54 |   |                     | walk-in clinic                                      |                                    | 91  |
| 55 | 0 |                     | hospital outpatient report                          | letter from outpatients            | 91  |
| 56 |   |                     | hospital outpatient report                          | letter from outpatients            | 91  |
| 57 | 0 | other care provider | other note                                          |                                    | 89  |
| 58 |   |                     | other note                                          |                                    | 89  |
| 59 | 0 | gp                  | administration note                                 | other note                         | 87  |
| 60 |   |                     | administration note                                 | other note                         | 87  |
| 61 | 0 | other care provider | medication requested                                | awaiting review                    | 85  |
| 62 |   |                     | medication requested                                | awaiting review                    | 85  |
| 63 | 0 | dr                  | laboratory result                                   | results recording                  | 84  |
| 64 |   |                     | laboratory result                                   | results recording                  | 84  |
| 65 | 0 |                     | awaiting clinical code migration to emis web        | mail from patient                  | 84  |
| 66 |   |                     | awaiting clinical code migration to emis web        | mail from patient                  | 84  |
| 67 | 0 |                     | awaiting clinical code migration to emis web        | health centre                      | 80  |
| 68 |   |                     | awaiting clinical code migration to emis web        | health centre                      | 80  |
| 69 | 0 | gp                  | administration note                                 | inbound document                   | 76  |
| 70 |   |                     | administration note                                 | inbound document                   | 76  |
| 71 | 0 | gp                  | other note                                          | awaiting review                    | 76  |
| 72 |   |                     | other note                                          | awaiting review                    | 76  |



|    |   |                     |                                              |                                    |    |
|----|---|---------------------|----------------------------------------------|------------------------------------|----|
| 1  |   |                     |                                              |                                    |    |
| 2  |   |                     |                                              |                                    |    |
| 3  | 0 | nurse               | walk-in clinic                               |                                    | 76 |
| 4  | 0 |                     | other note                                   | non-consultation medication data   | 76 |
| 5  |   | other care provider | awaiting clinical code migration to emis web | nhs direct report                  | 73 |
| 6  | 0 |                     | administration note                          | repeat issue                       | 73 |
| 7  | 0 | gp                  | ooh report                                   | awaiting review                    | 70 |
| 8  | 0 | gp                  | weekly care home ward round                  | awaiting review                    | 70 |
| 9  |   |                     | awaiting clinical code migration to emis web | medicine management                | 70 |
| 10 | 0 | other care provider | awaiting clinical code migration to emis web | open door surgery                  | 69 |
| 11 | 0 | other care provider | awaiting clinical code migration to emis web | telephone encounter                | 69 |
| 12 | 0 |                     | medication requested                         | awaiting review                    | 68 |
| 13 | 0 | other care provider | awaiting clinical code migration to emis web | telephone call to relative/carer   | 65 |
| 14 | 0 | dr                  | awaiting clinical code migration to emis web | repeat issue                       | 64 |
| 15 | 0 | gp                  | non-consultation medication data             | repeat issue                       | 64 |
| 16 | 0 | other care provider | awaiting clinical code migration to emis web | telephone call from a patient      | 64 |
| 17 | 0 | gp                  | clinic note                                  | nhs direct report                  | 62 |
| 18 | 0 | gp                  | non-consultation medication data             | medicine management                | 61 |
| 19 | 0 | other care provider | awaiting clinical code migration to emis web | letter from outpatients            | 61 |
| 20 | 0 | gp                  | hospital outpatient report                   | letter from outpatients            | 60 |
| 21 | 0 | gp                  | non-consultation data                        | data transferred from other system | 57 |
| 22 | 0 | nurse               | awaiting clinical code migration to emis web | enterprise consultation            | 57 |
| 23 | 0 | gp                  | outbound referral                            | referral letter                    | 55 |
| 24 | 0 | other care provider | repeat prescription                          | medicine management                | 55 |
| 25 | 0 | nurse               | seen in influenza vaccination clinic         | awaiting review                    | 54 |
| 26 | 0 |                     | administration note                          | results recording                  | 54 |
| 27 | 0 |                     | awaiting clinical code migration to emis web | telephone call from relative/carer | 54 |
| 28 | 0 | gp                  | awaiting clinical code migration to emis web | hospital outpatient report         | 53 |
| 29 | 0 | gp                  | gp surgery                                   |                                    | 53 |
| 30 | 0 | gp                  | third party consultation                     | out of hours, non practice         | 51 |
| 31 | 0 |                     | awaiting clinical code migration to emis web | telephone call to relative/carer   | 51 |
| 32 | 0 |                     | clinic note                                  | out of hours, non practice         | 51 |
| 33 | 0 |                     | face to face consultation                    | primary care centre                | 51 |
| 34 | 0 | gp                  | awaiting clinical code migration to emis web | laboratory result                  | 50 |
| 35 | 0 | nurse               | non-consultation medication data             | repeat issue                       | 48 |
| 36 | 0 |                     | awaiting clinical code migration to emis web | other note                         | 48 |
| 37 | 0 |                     | face to face consultation                    | triage                             | 48 |
| 38 | 0 | gp                  | progress report                              | nhs direct report                  | 47 |
| 39 | 0 | other care provider | ooh report                                   | nhs direct report                  | 47 |
| 40 |   |                     |                                              |                                    |    |
| 41 |   |                     |                                              |                                    |    |
| 42 |   |                     |                                              |                                    |    |
| 43 |   |                     |                                              |                                    |    |
| 44 |   |                     |                                              |                                    |    |
| 45 |   |                     |                                              |                                    |    |
| 46 |   |                     |                                              |                                    |    |
| 47 |   |                     |                                              |                                    |    |
| 48 |   |                     |                                              |                                    |    |
| 49 |   |                     |                                              |                                    |    |
| 50 |   |                     |                                              |                                    |    |
| 51 |   |                     |                                              |                                    |    |
| 52 |   |                     |                                              |                                    |    |
| 53 |   |                     |                                              |                                    |    |
| 54 |   |                     |                                              |                                    |    |
| 55 |   |                     |                                              |                                    |    |
| 56 |   |                     |                                              |                                    |    |
| 57 |   |                     |                                              |                                    |    |
| 58 |   |                     |                                              |                                    |    |
| 59 |   |                     |                                              |                                    |    |
| 60 |   |                     |                                              |                                    |    |

|   |                     |                                              |                                    |    |
|---|---------------------|----------------------------------------------|------------------------------------|----|
| 0 | nurse               | awaiting clinical code migration to emis web | non-consultation data              | 46 |
| 0 |                     | awaiting clinical code migration to emis web | nursing home                       | 46 |
| 0 | gp                  | awaiting clinical code migration to emis web | mail from patient                  | 45 |
| 0 | nurse               | awaiting clinical code migration to emis web | discussion with colleague          | 45 |
| 0 |                     | awaiting clinical code migration to emis web | e-mail received from patient       | 45 |
| 0 | nurse               | awaiting clinical code migration to emis web | medicine management                | 43 |
| 0 | nurse               | medication requested                         | repeat issue                       | 42 |
| 0 | dr                  | mail to patient                              | mail to patient                    | 40 |
| 0 | gp                  | awaiting clinical code migration to emis web | encompass message                  | 39 |
| 0 | gp                  | other note                                   | data transferred from other system | 39 |
| 0 | nurse               | awaiting clinical code migration to emis web | clinic note                        | 39 |
| 0 | nurse               | awaiting clinical code migration to emis web | laboratory result                  | 39 |
| 0 | other care provider | awaiting clinical code migration to emis web | other note                         | 39 |
| 0 | other care provider | medication requested                         | repeat issue                       | 38 |
| 0 | gp                  | administration note                          | non-consultation data              | 37 |
| 0 | other care provider | mail from patient                            | mail from patient                  | 37 |
| 0 | dr                  | awaiting clinical code migration to emis web | results recording                  | 36 |
| 0 | gp                  | awaiting clinical code migration to emis web | e-mail received from patient       | 36 |
| 0 | nurse               | awaiting clinical code migration to emis web | walk-in centre                     | 36 |
| 0 | other care provider | awaiting clinical code migration to emis web | gp2gp import                       | 36 |
| 0 |                     | administration note                          | mail to patient                    | 36 |
| 0 | gp                  | awaiting clinical code migration to emis web | home of patient                    | 35 |
| 0 | gp                  | awaiting clinical code migration to emis web | casualty attendance                | 34 |
| 0 | gp                  | inbound document                             | letter from outpatients            | 34 |
| 0 | other care provider | awaiting clinical code migration to emis web | outbound referral                  | 34 |
| 0 | other care provider | extended hours consultation                  | out of hours, non practice         | 34 |
| 0 | gp                  | awaiting clinical code migration to emis web | telephone encounter                | 33 |
| 0 | gp                  | seen in hospital ward                        | awaiting review                    | 33 |
| 0 |                     | other note                                   | non-consultation data              | 33 |
| 0 | nurse               | other note                                   | awaiting review                    | 32 |
| 0 | other care provider | awaiting clinical code migration to emis web | discussion with colleague          | 32 |
| 0 |                     | discussion with other professional           | awaiting review                    | 32 |

|    |   |                     |                                                                                     |                                     |    |
|----|---|---------------------|-------------------------------------------------------------------------------------|-------------------------------------|----|
| 1  |   |                     | multidisciplinary team meeting without patient                                      | awaiting review                     | 32 |
| 2  | 0 |                     | children's home visit note                                                          |                                     | 31 |
| 3  | 0 | other care provider | laboratory result                                                                   | results recording                   | 30 |
| 4  | 0 |                     | awaiting clinical code migration to emis web                                        | casualty attendance                 | 30 |
| 5  | 0 |                     | extended hours consultation                                                         | nhs direct report                   | 30 |
| 6  | 0 | nurse               | administration note                                                                 | awaiting review                     | 29 |
| 7  | 0 | nurse               | awaiting clinical code migration to emis web                                        | letter from outpatients             | 29 |
| 8  | 0 | nurse               | awaiting clinical code migration to emis web                                        | open door surgery                   | 29 |
| 9  | 0 | nurse               | discussion with other professional                                                  | awaiting review                     | 29 |
| 10 | 0 | nurse               | ooh report                                                                          | out of hours, non practice          | 29 |
| 11 | 0 |                     | face to face consultation                                                           | treatment room                      | 29 |
| 12 | 0 | gp                  | email received from carer                                                           | awaiting review                     | 28 |
| 13 | 0 | other care provider | awaiting clinical code migration to emis web                                        | telephone triage encounter          | 28 |
| 14 | 0 |                     | administration note                                                                 | touchscreen                         | 28 |
| 15 | 0 | nurse               | awaiting clinical code migration to emis web                                        | encompass message                   | 27 |
| 16 | 0 | nurse               | awaiting clinical code migration to emis web                                        | nursing home                        | 27 |
| 17 | 0 |                     | third party consultation                                                            | out of hours, non practice          | 27 |
| 18 | 0 | gp                  | awaiting clinical code migration to emis web                                        | follow-up/routine visit             | 26 |
| 19 | 0 | other care provider | emergency consultation                                                              | accident & emergency                | 26 |
| 20 | 0 | gp                  | hospital outpatient report                                                          | nhs direct report                   | 25 |
| 21 | 0 | other care provider | awaiting clinical code migration to emis web                                        | telephone call from relative/carers | 23 |
| 22 | 0 | other care provider | outbound referral                                                                   | referral letter                     | 23 |
| 23 | 0 |                     | externally entered note                                                             | scanned document                    | 23 |
| 24 | 0 | nurse               | multidisciplinary team meeting without patient                                      | awaiting review                     | 22 |
| 25 | 0 |                     | other consultation medium used                                                      | data transferred from other system  | 22 |
| 26 | 0 | dr                  | awaiting clinical code migration to emis web                                        | outbound referral                   | 21 |
| 27 | 0 | gp                  | seen in influenza vaccination clinic                                                | awaiting review                     | 21 |
| 28 | 0 | nurse               | awaiting clinical code migration to emis web                                        | other note                          | 21 |
| 29 | 0 |                     | ooh report                                                                          | nhs direct report                   | 21 |
| 30 | 0 | dr                  | awaiting clinical code migration to emis web                                        | inbound document                    | 20 |
| 31 | 0 | gp                  | awaiting clinical code migration to emis web                                        | day case report                     | 20 |
| 32 | 0 | other care provider | seen by general practitioner with special interest in ear nose and throat disorders | data transferred from other system  | 20 |
| 33 | 0 |                     | emergency consultation                                                              | accident & emergency                | 20 |
| 34 | 0 | gp                  | awaiting clinical code migration to emis web                                        | online services message             | 19 |

1  
2  
3  
4  
5  
6  
7  
8  
9  
10  
11  
12  
13  
14  
15  
16  
17  
18  
19  
20  
21  
22  
23  
24  
25  
26  
27  
28  
29  
30  
31  
32  
33  
34  
35  
36  
37  
38  
39  
40  
41  
42  
43  
44  
45  
46  
47  
48  
49  
50  
51  
52  
53  
54  
55  
56  
57  
58  
59  
60

|   |                     |                                                                                     |                                    |    |
|---|---------------------|-------------------------------------------------------------------------------------|------------------------------------|----|
| 0 | gp                  | hospital outpatient report                                                          | third party consultation           | 19 |
| 0 | nurse               | repeat prescription                                                                 | awaiting review                    | 19 |
| 0 |                     | awaiting clinical code migration to emis web                                        | walk in centre                     | 19 |
| 0 | dr                  | hospital inpatient report                                                           | hospital inpatient report          | 18 |
| 0 | other care provider | awaiting clinical code migration to emis web                                        | residential home visit note        | 18 |
| 0 | other care provider | walk-in clinic                                                                      |                                    | 18 |
| 0 |                     | awaiting clinical code migration to emis web                                        | residential home visit note        | 18 |
| 0 |                     | awaiting clinical code migration to emis web                                        | telephone triage encounter         | 18 |
| 0 | dr                  | outbound referral                                                                   | outbound referral                  | 17 |
| 0 | gp                  | ooh report                                                                          | third party consultation           | 17 |
| 0 | gp                  | other consultation medium used                                                      | nhs direct report                  | 17 |
| 0 | gp                  | radiology result                                                                    | awaiting review                    | 17 |
| 0 | gp                  | telephone consultation                                                              | telephone call from relative/carer | 17 |
| 0 | other care provider | awaiting clinical code migration to emis web                                        | enterprise consultation            | 17 |
| 0 | other care provider | walk-in clinic                                                                      | walk in centre                     | 17 |
| 0 |                     | administration note                                                                 | referral letter                    | 17 |
| 0 | dr                  | other note                                                                          | other note                         | 16 |
| 0 | other care provider | awaiting clinical code migration to emis web                                        | nursing home visit note            | 16 |
| 0 | dr                  | medication requested                                                                | repeat issue                       | 15 |
| 0 | other care provider | administration note                                                                 | inbound document                   | 15 |
| 0 | other care provider | awaiting clinical code migration to emis web                                        | out of hours, non practice         | 15 |
| 0 |                     | non-consultation data                                                               | data transferred from other system | 15 |
| 0 | other care provider | face to face consultation                                                           | triage                             | 15 |
| 0 | dr                  | awaiting clinical code migration to emis web                                        | telephone call to a patient        | 14 |
| 0 | dr                  | externally entered note                                                             | externally entered note            | 14 |
| 0 | gp                  | hospital inpatient report                                                           | discharge details                  | 14 |
| 0 | gp                  | seen by general practitioner with special interest in ear nose and throat disorders | data transferred from other system | 14 |
| 0 | other care provider | administration note                                                                 | scanned document                   | 14 |
| 0 | other care provider | discussion with other professional                                                  | awaiting review                    | 14 |
| 0 |                     | awaiting clinical code migration to emis web                                        | out of hours, practice             | 14 |
| 0 |                     | externally entered note                                                             |                                    | 14 |
| 0 | dr                  | telephone call to relative/carer                                                    | telephone call to relative/carer   | 13 |
| 0 | nurse               | awaiting clinical code migration to emis web                                        | nhs direct report                  | 13 |
| 0 | nurse               | awaiting clinical code migration to emis web                                        | out of hours, non practice         | 13 |
| 0 |                     | hospital inpatient note                                                             | awaiting review                    | 13 |

|    |   |                     |                                                     |                                    |      |
|----|---|---------------------|-----------------------------------------------------|------------------------------------|------|
| 1  |   |                     |                                                     |                                    |      |
| 2  |   |                     |                                                     |                                    |      |
| 3  | 0 |                     | repeat prescription                                 | awaiting review                    | 13   |
| 4  | 0 | gp                  | other note                                          | encompass message                  | 12   |
| 5  |   |                     | awaiting clinical code migration to emis web        |                                    |      |
| 6  | 0 | nurse               | awaiting clinical code migration to emis web        | hospital outpatient report         | 12   |
| 7  |   |                     | awaiting clinical code migration to emis web        |                                    |      |
| 8  | 0 | other care provider | awaiting clinical code migration to emis web        | accident & emergency               | 12   |
| 9  |   |                     | awaiting clinical code migration to emis web        |                                    |      |
| 10 | 0 | nurse               | other note                                          | encompass message                  | 11   |
| 11 |   |                     | other note                                          |                                    |      |
| 12 | 0 | nurse               | repeat prescription                                 | repeat issue                       | 11   |
| 13 |   |                     | repeat prescription                                 |                                    |      |
| 14 | 0 | other care provider | seen in influenza vaccination clinic                | awaiting review                    | 11   |
| 15 |   |                     | seen in influenza vaccination clinic                |                                    |      |
| 16 | 0 |                     | awaiting clinical code migration to emis web        | discussion with colleague          | 11   |
| 17 |   |                     | awaiting clinical code migration to emis web        |                                    |      |
| 18 | 0 |                     | awaiting clinical code migration to emis web        | hospital outpatient consultation   | 11   |
| 19 |   |                     | awaiting clinical code migration to emis web        |                                    |      |
| 20 | 0 |                     | awaiting clinical code migration to emis web        | walk-in clinic                     | 11   |
| 21 |   |                     | awaiting clinical code migration to emis web        |                                    |      |
| 22 | 0 |                     | non-consultation medication data                    | medicine management                | 11   |
| 23 |   |                     | non-consultation medication data                    |                                    |      |
| 24 | 0 |                     | provision of general practitioner intermediate care | awaiting review                    | 10   |
| 25 |   |                     | provision of general practitioner intermediate care |                                    |      |
| 26 | 0 | dr                  | clinic note                                         | awaiting review                    | < 10 |
| 27 |   |                     | clinic note                                         |                                    |      |
| 28 | 0 | other care provider | ooh report                                          | out of hours centre                | < 10 |
| 29 |   |                     | ooh report                                          |                                    |      |
| 30 | 0 |                     | administration note                                 | non-consultation data              | < 10 |
| 31 |   |                     | administration note                                 |                                    |      |
| 32 | 0 |                     | clinic note                                         | nhs direct report                  | < 10 |
| 33 |   |                     | clinic note                                         |                                    |      |
| 34 | 0 |                     | telephone follow-up                                 | awaiting review                    | < 10 |
| 35 |   |                     | telephone follow-up                                 |                                    |      |
| 36 | 0 | gp                  | administration note                                 | clinic note                        | < 10 |
| 37 |   |                     | administration note                                 |                                    |      |
| 38 | 0 | gp                  | progress report                                     | awaiting review                    | < 10 |
| 39 |   |                     | progress report                                     |                                    |      |
| 40 | 0 | nurse               | awaiting clinical code migration to emis web        | acute visit                        | < 10 |
| 41 |   |                     | awaiting clinical code migration to emis web        |                                    |      |
| 42 | 0 | other care provider | multidisciplinary team meeting without patient      | awaiting review                    | < 10 |
| 43 |   |                     | multidisciplinary team meeting without patient      |                                    |      |
| 44 | 0 |                     | administration note                                 | other note                         | < 10 |
| 45 |   |                     | administration note                                 |                                    |      |
| 46 | 0 | dr                  | awaiting clinical code migration to emis web        | home visit note                    | < 10 |
| 47 |   |                     | awaiting clinical code migration to emis web        |                                    |      |
| 48 | 0 | gp                  | hospital inpatient note                             | day case report                    | < 10 |
| 49 |   |                     | hospital inpatient note                             |                                    |      |
| 50 | 0 | gp                  | inbound document                                    | discharge details                  | < 10 |
| 51 |   |                     | inbound document                                    |                                    |      |
| 52 | 0 | nurse               | awaiting clinical code migration to emis web        | follow-up/routine visit            | < 10 |
| 53 |   |                     | awaiting clinical code migration to emis web        |                                    |      |
| 54 | 0 | other care provider | awaiting clinical code migration to emis web        | discharge details                  | < 10 |
| 55 |   |                     | awaiting clinical code migration to emis web        |                                    |      |
| 56 | 0 |                     | awaiting clinical code migration to emis web        | enterprise consultation            | < 10 |
| 57 |   |                     | awaiting clinical code migration to emis web        |                                    |      |
| 58 | 0 |                     | awaiting clinical code migration to emis web        | nursing home visit note            | < 10 |
| 59 |   |                     | awaiting clinical code migration to emis web        |                                    |      |
| 60 | 0 |                     | email received from carer                           | awaiting review                    | < 10 |
|    |   |                     | email received from carer                           |                                    |      |
|    | 0 |                     | ooh report                                          | out of hours, practice             | < 10 |
|    |   |                     | ooh report                                          |                                    |      |
|    | 0 |                     | other note                                          | data transferred from other system | < 10 |
|    |   |                     | other note                                          |                                    |      |
|    | 0 |                     | outbound referral                                   | referral letter                    | < 10 |
|    |   |                     | outbound referral                                   |                                    |      |
|    | 0 |                     | radiology result                                    | awaiting review                    | < 10 |
|    |   |                     | radiology result                                    |                                    |      |
|    | 0 | dr                  | gp surgery                                          | awaiting review                    | < 10 |
|    |   |                     | gp surgery                                          |                                    |      |
|    | 0 | gp                  | routine consultation                                | repeat issue                       | < 10 |
|    |   |                     | routine consultation                                |                                    |      |
|    | 0 | nurse               | email received from carer                           | awaiting review                    | < 10 |
|    |   |                     | email received from carer                           |                                    |      |
|    | 0 | nurse               | non-consultation data                               | data transferred from other system | < 10 |
|    |   |                     | non-consultation data                               |                                    |      |

|    |   |                     |                                              |                                    |      |
|----|---|---------------------|----------------------------------------------|------------------------------------|------|
| 1  |   |                     |                                              |                                    |      |
| 2  |   |                     |                                              |                                    |      |
| 3  | 0 | nurse               | scanned document                             | docman                             | < 10 |
| 4  |   | other care provider | awaiting clinical code migration to emis web | home of patient                    | < 10 |
| 5  | 0 | other care provider | hospital outpatient report                   | letter from outpatients            | < 10 |
| 6  |   |                     |                                              |                                    |      |
| 7  | 0 | dr                  | discussion with colleague                    | discussion with colleague          | < 10 |
| 8  |   |                     |                                              |                                    |      |
| 9  | 0 | gp                  | administration note                          | discussion with colleague          | < 10 |
| 10 |   |                     |                                              |                                    |      |
| 11 | 0 | gp                  | awaiting clinical code migration to emis web | out of hours, practice             | < 10 |
| 12 |   |                     |                                              |                                    |      |
| 13 | 0 | gp                  | clinic note                                  | out of hours, non practice         | < 10 |
| 14 |   |                     |                                              |                                    |      |
| 15 | 0 | gp                  | ooh report                                   | out of hours, practice             | < 10 |
| 16 |   |                     |                                              |                                    |      |
| 17 | 0 | gp                  | seen in diabetic clinic                      | awaiting review                    | < 10 |
| 18 |   |                     |                                              |                                    |      |
| 19 | 0 | gp                  | sms text message sent to patient             | awaiting review                    | < 10 |
| 20 |   |                     |                                              |                                    |      |
| 21 | 0 | nurse               | administration note                          | discussion with colleague          | < 10 |
| 22 |   | other care provider | awaiting clinical code migration to emis web | nursing home                       | < 10 |
| 23 |   | other care provider | awaiting clinical code migration to emis web | online services message            | < 10 |
| 24 |   |                     | awaiting clinical code migration to emis web | bulk operation                     | < 10 |
| 25 | 0 |                     | non-consultation data                        | touchscreen                        | < 10 |
| 26 |   |                     |                                              |                                    |      |
| 27 | 0 | dr                  | awaiting clinical code migration to emis web | hospital outpatient report         | < 10 |
| 28 |   |                     |                                              |                                    |      |
| 29 | 0 | dr                  | awaiting clinical code migration to emis web | other                              | < 10 |
| 30 |   |                     |                                              |                                    |      |
| 31 | 0 | dr                  | awaiting clinical code migration to emis web | third party consultation           | < 10 |
| 32 |   |                     |                                              |                                    |      |
| 33 | 0 | dr                  | clinic note                                  | clinic note                        | < 10 |
| 34 |   |                     |                                              |                                    |      |
| 35 | 0 | dr                  | non-consultation data                        | non-consultation data              | < 10 |
| 36 |   |                     |                                              |                                    |      |
| 37 | 0 | gp                  | awaiting clinical code migration to emis web | hospital inpatient report          | < 10 |
| 38 |   |                     |                                              |                                    |      |
| 39 | 0 | gp                  | clinic note                                  | community clinic                   | < 10 |
| 40 |   |                     |                                              |                                    |      |
| 41 | 0 | nurse               | administration note                          | non-consultation data              | < 10 |
| 42 |   |                     |                                              |                                    |      |
| 43 | 0 | nurse               | awaiting clinical code migration to emis web | non-consultation medication data   | < 10 |
| 44 |   | other care provider | externally entered note                      | data transferred from other system | < 10 |
| 45 |   | other care provider | gp surgery                                   |                                    | < 10 |
| 46 |   | other care provider | other note                                   | referral letter                    | < 10 |
| 47 |   |                     |                                              |                                    |      |
| 48 | 0 |                     | awaiting clinical code migration to emis web | nurseries/playgroup                | < 10 |
| 49 |   |                     |                                              |                                    |      |
| 50 | 0 |                     | hospital outpatient report                   | third party consultation           | < 10 |
| 51 |   |                     |                                              |                                    |      |
| 52 | 0 | gp                  | nurse telephone triage                       | nurse telephone triage             | < 10 |
| 53 |   |                     |                                              |                                    |      |
| 54 | 0 | dr                  | awaiting clinical code migration to emis web | discussion with colleague          | < 10 |
| 55 |   |                     |                                              |                                    |      |
| 56 | 0 | dr                  | awaiting clinical code migration to emis web | medicine management                | < 10 |
| 57 |   |                     |                                              |                                    |      |
| 58 | 0 | dr                  | awaiting clinical code migration to emis web | residential home visit note        | < 10 |
| 59 |   |                     |                                              |                                    |      |
| 60 | 0 | dr                  | e-mail received from patient                 | e-mail received from patient       | < 10 |
|    |   |                     |                                              |                                    |      |
|    | 0 | dr                  | telephone call from relative/carer           | telephone call from relative/carer | < 10 |

|   |                     |                                              |                                    |      |
|---|---------------------|----------------------------------------------|------------------------------------|------|
| 0 | gp                  | awaiting clinical code migration to emis web | walk-in centre                     | < 10 |
| 0 | gp                  | extended hours consultation                  | out of hours, non practice         | < 10 |
| 0 | gp                  | externally entered note                      |                                    | < 10 |
| 0 | gp                  | other consultation medium used               | other note                         | < 10 |
| 0 | gp                  | telephone consultation                       | telephone call to relative/carer   | < 10 |
| 0 | nurse               | awaiting clinical code migration to emis web | telephone encounter                | < 10 |
| 0 | nurse               | medication requested                         | awaiting review                    | < 10 |
| 0 | nurse               | telephone follow-up                          | awaiting review                    | < 10 |
| 0 | other care provider | awaiting clinical code migration to emis web | e-mail received from patient       | < 10 |
| 0 | other care provider | awaiting clinical code migration to emis web | mail from patient                  | < 10 |
| 0 | other care provider | awaiting clinical code migration to emis web | out of hours, practice             | < 10 |
| 0 | other care provider | other note                                   | data transferred from other system | < 10 |
| 0 |                     | awaiting clinical code migration to emis web | day case report                    | < 10 |
| 0 |                     | awaiting clinical code migration to emis web | encompass message                  | < 10 |
| 0 |                     | e-mail encounter to carer                    | awaiting review                    | < 10 |
| 0 |                     | walk-in clinic                               | walk in centre                     | < 10 |
| 0 | dr                  | awaiting clinical code migration to emis web | non-consultation data              | < 10 |
| 0 | dr                  | awaiting clinical code migration to emis web | other note                         | < 10 |
| 0 | dr                  | e-mail sent to patient                       | awaiting review                    | < 10 |
| 0 | gp                  | email received from third party              | awaiting review                    | < 10 |
| 0 | gp                  | hospital inpatient note                      | awaiting review                    | < 10 |
| 0 | gp                  | night visit note                             | night visit                        | < 10 |
| 0 | gp                  | other note                                   | third party consultation           | < 10 |
| 0 | gp                  | telephone encounter                          | telephone call to relative/carer   | < 10 |
| 0 | gp                  | telephone follow-up                          | awaiting review                    | < 10 |
| 0 | nurse               | administration note                          | referral letter                    | < 10 |
| 0 | nurse               | awaiting clinical code migration to emis web | urgent consultation                | < 10 |
| 0 | nurse               | seen in asthma clinic                        | awaiting review                    | < 10 |
| 0 | nurse               | seen in hospital ward                        | awaiting review                    | < 10 |
| 0 | nurse               | telephone consultation                       | telephone call to relative/carer   | < 10 |
| 0 | other care provider | administration note                          | other note                         | < 10 |
| 0 | other care provider | administration note                          | referral letter                    | < 10 |
| 0 | other care provider | administration note                          | repeat issue                       | < 10 |
| 0 | other care provider | administration note                          | results recording                  | < 10 |
| 0 | other care provider | awaiting clinical code migration to emis web | casualty attendance                | < 10 |
| 0 | other care provider | awaiting clinical code migration to emis web | diabetic clinic                    | < 10 |



|    |   |                     |                                              |                                         |
|----|---|---------------------|----------------------------------------------|-----------------------------------------|
| 1  |   |                     |                                              |                                         |
| 2  |   |                     |                                              |                                         |
| 3  |   |                     |                                              |                                         |
| 4  | 0 | other care provider | awaiting clinical code migration to emis web | encompass message < 10                  |
| 5  |   |                     |                                              |                                         |
| 6  | 0 | other care provider | clinic note                                  | nhs direct report < 10                  |
| 7  |   |                     |                                              |                                         |
| 8  | 0 | other care provider | seen in diabetic clinic                      | awaiting review < 10                    |
| 9  |   |                     |                                              |                                         |
| 10 | 0 |                     | awaiting clinical code migration to emis web | other report < 10                       |
| 11 |   |                     |                                              |                                         |
| 12 | 0 |                     | child in need meeting                        | awaiting review < 10                    |
| 13 |   |                     |                                              |                                         |
| 14 | 0 |                     | hospital inpatient report                    | hospital inpatient < 10                 |
| 15 |   |                     |                                              |                                         |
| 16 | 0 |                     | progress report                              | nhs direct report < 10                  |
| 17 |   |                     |                                              |                                         |
| 18 | 0 |                     | repeat prescription                          | non-consultation medication data < 10   |
| 19 |   |                     |                                              |                                         |
| 20 | 0 |                     | weekly care home ward round                  | awaiting review < 10                    |
| 21 |   |                     |                                              |                                         |
| 22 | 0 | dr                  | awaiting clinical code migration to emis web | non-consultation medication data < 10   |
| 23 |   |                     |                                              |                                         |
| 24 | 0 | dr                  | awaiting clinical code migration to emis web | telephone call from a patient < 10      |
| 25 |   |                     |                                              |                                         |
| 26 | 0 | dr                  | awaiting clinical code migration to emis web | telephone call from relative/carer < 10 |
| 27 |   |                     |                                              |                                         |
| 28 | 0 | dr                  | awaiting clinical code migration to emis web | telephone call to relative/carer < 10   |
| 29 |   |                     |                                              |                                         |
| 30 | 0 | gp                  | awaiting clinical code migration to emis web | night visit , practice < 10             |
| 31 |   |                     |                                              |                                         |
| 32 | 0 | gp                  | awaiting clinical code migration to emis web | walk-in clinic < 10                     |
| 33 |   |                     |                                              |                                         |
| 34 | 0 | gp                  | non-consultation medication data             | non-consultation medication data < 10   |
| 35 |   |                     |                                              |                                         |
| 36 | 0 | gp                  | other consultation medium used               | referral letter < 10                    |
| 37 |   |                     |                                              |                                         |
| 38 | 0 | gp                  | other note                                   | non-consultation data < 10              |
| 39 |   |                     |                                              |                                         |
| 40 | 0 | gp                  | other note                                   | non-consultation medication data < 10   |
| 41 |   |                     |                                              |                                         |
| 42 | 0 | gp                  | seen in baby clinic                          | awaiting review < 10                    |
| 43 |   |                     |                                              |                                         |
| 44 | 0 | gp                  | telephone encounter                          | telephone call from relative/carer < 10 |
| 45 |   |                     |                                              |                                         |
| 46 | 0 | nurse               | administration note                          | clinic note < 10                        |
| 47 |   |                     |                                              |                                         |
| 48 | 0 | nurse               | administration note                          | laboratory result < 10                  |
| 49 |   |                     |                                              |                                         |
| 50 | 0 | nurse               | awaiting clinical code migration to emis web | casualty attendance < 10                |
| 51 |   |                     |                                              |                                         |
| 52 | 0 | nurse               | awaiting clinical code migration to emis web | patientchase insert < 10                |
| 53 |   |                     |                                              |                                         |
| 54 | 0 | nurse               | clinic note                                  | community clinic < 10                   |
| 55 |   |                     |                                              |                                         |
| 56 | 0 | nurse               | extended hours consultation                  | out of hours, non practice < 10         |
| 57 |   |                     |                                              |                                         |
| 58 | 0 | nurse               | externally entered note                      | data transferred from other system < 10 |
| 59 |   |                     |                                              |                                         |
| 60 | 0 | nurse               | first attendance face to face                | awaiting review < 10                    |
|    |   |                     |                                              |                                         |
|    | 0 | nurse               | hospital inpatient note                      | awaiting review < 10                    |
|    |   |                     |                                              |                                         |
|    | 0 | nurse               | ooh report                                   | out of hours, practice < 10             |
|    |   |                     |                                              |                                         |
|    | 0 | nurse               | other consultation medium used               | data transferred from other system < 10 |
|    |   |                     |                                              |                                         |
|    | 0 | nurse               | other note                                   | data transferred from other system < 10 |
|    |   |                     |                                              |                                         |
|    | 0 | nurse               | other note                                   | referral letter < 10                    |
|    |   |                     |                                              |                                         |
|    | 0 | nurse               | outbound referral                            | referral letter < 10                    |
|    |   |                     |                                              |                                         |
|    | 0 | nurse               | patient initiated enc. nos                   | awaiting review < 10                    |
|    |   |                     |                                              |                                         |
|    | 0 | nurse               | telephone consultation                       | telephone call from relative/carer < 10 |
|    |   |                     |                                              |                                         |
|    | 0 | nurse               | telephone encounter                          | telephone call to relative/carer < 10   |
|    |   |                     |                                              |                                         |
|    | 0 | nurse               | weekly care home ward round                  | awaiting review < 10                    |

|   |                     |                                                     |                                    |      |
|---|---------------------|-----------------------------------------------------|------------------------------------|------|
| 0 | other care provider | administration note                                 | mail to patient                    | < 10 |
| 0 | other care provider | awaiting clinical code migration to emis web        | hospital inpatient report          | < 10 |
| 0 | other care provider | awaiting clinical code migration to emis web        | hospital outpatient report         | < 10 |
| 0 | other care provider | awaiting clinical code migration to emis web        | laboratory result                  | < 10 |
| 0 | other care provider | clinic note                                         | community clinic                   | < 10 |
| 0 | other care provider | first attendance face to face                       | awaiting review                    | < 10 |
| 0 | other care provider | inbound referral                                    | awaiting review                    | < 10 |
| 0 | other care provider | non-consultation data                               | data transferred from other system | < 10 |
| 0 | other care provider | ooh report                                          | out of hours, non practice         | < 10 |
| 0 | other care provider | telephone encounter                                 | awaiting review                    | < 10 |
| 0 |                     | awaiting clinical code migration to emis web        | follow-up/routine visit            | < 10 |
| 0 |                     | awaiting clinical code migration to emis web        | letter                             | < 10 |
| 0 |                     | awaiting clinical code migration to emis web        | minor injuries unit                | < 10 |
| 0 |                     | awaiting clinical code migration to emis web        | secretary                          | < 10 |
| 0 |                     | email received from third party                     | awaiting review                    | < 10 |
| 0 |                     | gp surgery                                          | non-consultation data              | < 10 |
| 0 |                     | hospital inpatient report                           | awaiting review                    | < 10 |
| 0 |                     | hospital inpatient report                           | discharge details                  | < 10 |
| 0 |                     | multidisciplinary team meeting with patient         | awaiting review                    | < 10 |
| 0 |                     | night visit note                                    | night visit, local rota            | < 10 |
| 0 |                     | provision of general practitioner intermediate care | gp2gp import                       | < 10 |
| 0 |                     | telephone triage encounter                          | nhs direct report                  | < 10 |
| 0 |                     | third party consultation                            | third party                        | < 10 |
| 0 | other care provider | nurse telephone triage                              | nurse telephone triage             | < 10 |

### Annex 3: NHS targets for cancer wait times

|                                    |                                                                                                                                                                                                                                                                                                                                    | Operational standard |     |
|------------------------------------|------------------------------------------------------------------------------------------------------------------------------------------------------------------------------------------------------------------------------------------------------------------------------------------------------------------------------------|----------------------|-----|
| Maximum two weeks from             | Receipt of urgent referral for suspected cancer to first outpatient attendance                                                                                                                                                                                                                                                     | 93%                  |     |
|                                    | Receipt of referral of any patient with breast symptoms (where cancer not suspected) to first hospital assessment                                                                                                                                                                                                                  | 93%                  |     |
| Maximum 28 days from               | Receipt of two week wait referral for suspected cancer, receipt of urgent referral from a cancer screening programme (breast, bowel, cervical), and receipt of two week wait referral of any patient with breast symptoms (where cancer not suspected), to the date the patient is informed of a diagnosis or ruling out of cancer | 75%                  |     |
| Maximum one month (31 days) from:  | Decision to treat to first definitive treatment                                                                                                                                                                                                                                                                                    | 96%                  |     |
|                                    | Decision to treat/earliest clinically appropriate date to start of second or subsequent treatment(s) for all cancer patients including those diagnosed with a recurrence where the subsequent treatment is:                                                                                                                        | surgery              | 94% |
|                                    |                                                                                                                                                                                                                                                                                                                                    | drug treatment       | 98% |
|                                    |                                                                                                                                                                                                                                                                                                                                    | radiotherapy         | 94% |
| Maximum two months (62 days) from: | Urgent referral for suspected cancer to first treatment (62-day classic)                                                                                                                                                                                                                                                           | 85%                  |     |
|                                    | Urgent referral from a NHS Cancer Screening Programme (breast, cervical or bowel) for suspected cancer to first treatment                                                                                                                                                                                                          | 90%                  |     |

### Annex 4: Comparing Cancer Wait Times counts for referrals and first treatments with the NCRAS data equity pack

Table A4.1: Comparing Cancer Wait Times counts for referrals and first treatments with the NCRAS data equity pack

| Cancer wait times data | 01 Apr 2020 - 31 Jan 2021       |          |                            |                         |           |                            |
|------------------------|---------------------------------|----------|----------------------------|-------------------------|-----------|----------------------------|
|                        | First treatments for new cancer |          |                            | Urgent cancer referrals |           |                            |
|                        | Observed                        | Expected | Percentage change (95% CI) | Observed                | Expected  | Percentage change (95% CI) |
| All                    | 224,323                         | 267,946  | -16.3% (-16.6, -15.9)      | 1,673,775               | 2,071,967 | -19.2% (-19.3, -19.1)      |
| NCRAS data equity pack |                                 |          |                            |                         |           |                            |
| All                    | 219,410                         | 254,436  | -13.8% (-14.3, -13.3)      | 1,658,309               | 1,984,489 | -16.4% (-16.6, -16.3)      |
| Breast                 | 30,488                          | 40,530   | -24.8% (-25.9, -23.6)      | 337,582                 | 363,139   | -7% (-7.5, -6.6)           |
| Gynaecological         | 11,281                          | 12,344   | -8.6% (-10.9, -6.2)        | 158,723                 | 176,985   | -10.3% (-10.9, -9.7)       |
| Head and Neck          | 8,892                           | 9,901    | -10.2% (-12.7, -7.6)       | 163,668                 | 189,837   | -13.8% (-14.4, -13.2)      |
| Lower GI               | 23,507                          | 27,056   | -13.1% (-14.6, -11.6)      | 302,369                 | 366,677   | -17.5% (-17.9, -17.1)      |
| Lung                   | 24,796                          | 27,409   | -9.5% (-11.1, -8.0)        | 33,830                  | 53,641    | -36.9% (-37.8, -36.1)      |
| Skin                   | 40,977                          | 43,475   | -5.7% (-7.0, -4.5)         | 338,172                 | 429,802   | -21.3% (-21.7, -21.0)      |
| Upper GI               | 17,059                          | 17,586   | -3% (-5.0, -0.9)           | 141,720                 | 163,013   | -13.1% (-13.7, -12.4)      |
| Urological             | 37,970                          | 50,056   | -24.1% (-25.2, -23.1)      | 134,389                 | 184,642   | -27.2% (-27.7, -26.7)      |
| All other              | 24,441                          | 26,080   | -6.3% (-7.9, -4.6)         | 47,856                  | 56,753    | -15.7% (-16.7, -14.6)      |

## Annex 5: Patient demographics and person-time and total numbers of observed activity in CPRD Aurum sample

Table A5.1: Patient demographics in CPRD Aurum sample as at 22 March 2020

|                  | Patient count as at 22 March 2020 |       |
|------------------|-----------------------------------|-------|
|                  | n                                 | %     |
| All              | 375,501                           |       |
| Female           | 187,509                           | 49.9% |
| Male             | 187,992                           | 50.1% |
| Under 11         | 39,611                            | 10.5% |
| 11 to 19         | 43,406                            | 11.6% |
| 20 to 49         | 157,962                           | 42.1% |
| 50 to 69         | 87,482                            | 23.3% |
| 70 and older     | 47,040                            | 12.5% |
| IMD Quintile - 1 | 78,759                            | 21.0% |
| IMD Quintile - 2 | 73,046                            | 19.5% |
| IMD Quintile - 3 | 71,840                            | 19.1% |
| IMD Quintile - 4 | 77,545                            | 20.7% |
| IMD Quintile - 5 | 74,020                            | 19.7% |
| IMD not recorded | 291                               | 0.1%  |

Table A5.2: Person time (weeks) and total primary care activity analysed - CPRD Aurum

|                                     | 3 January 2016 - 21 March 2020* |                       |                | 22 March 2020 - 30 January 2021         |                      |                       |                |                                         |
|-------------------------------------|---------------------------------|-----------------------|----------------|-----------------------------------------|----------------------|-----------------------|----------------|-----------------------------------------|
|                                     | Patient-time (weeks)            | 100,000 person-months | Activity count | Observed rate per 100,000 person-months | Patient-time (weeks) | 100,000 person-months | Activity count | Observed rate per 100,000 person-months |
| Consultations excl flu vaccinations | 78,868,977                      | 181.44                | 6,912,079      | 38,095                                  | 16,701,707           | 38.19                 | 1,306,206      | 34,201                                  |
| Routine Referrals                   | 78,868,977                      | 181.44                | 312,422        | 1,722                                   | 16,701,707           | 38.19                 | 40,744         | 1,067                                   |
| 2 Week Wait Referrals               | 78,868,977                      | 181.44                | 38,905         | 214                                     | 16,701,707           | 38.19                 | 10,235         | 268                                     |

\*The pre-pandemic period consists of 220 weeks or 51.61 months, the post pandemic period is 45 weeks or 10.29 months

### Annex 6: Observed vs expected appointment and cancer diagnosis counts from CWT data from 01 Jan 2019 (per person-month)

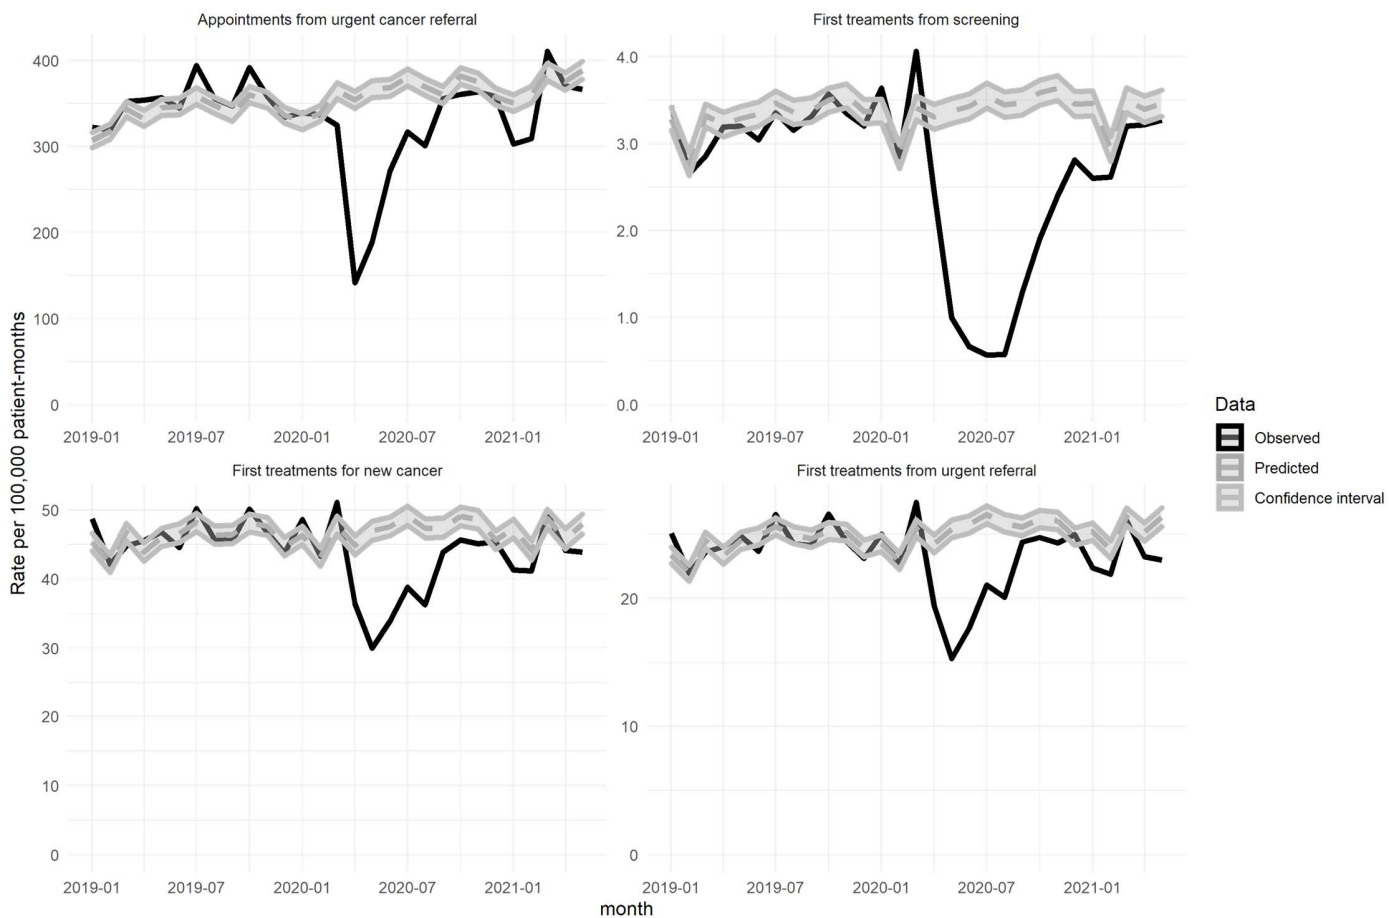

ew only

### Annex 7: Observed vs expected consultations by IMD quintile

Figure A7: Observed vs expected consultations per person per week by IMD quintile, age-standardised (01 Jan 2019 – 30 Jan 2021)

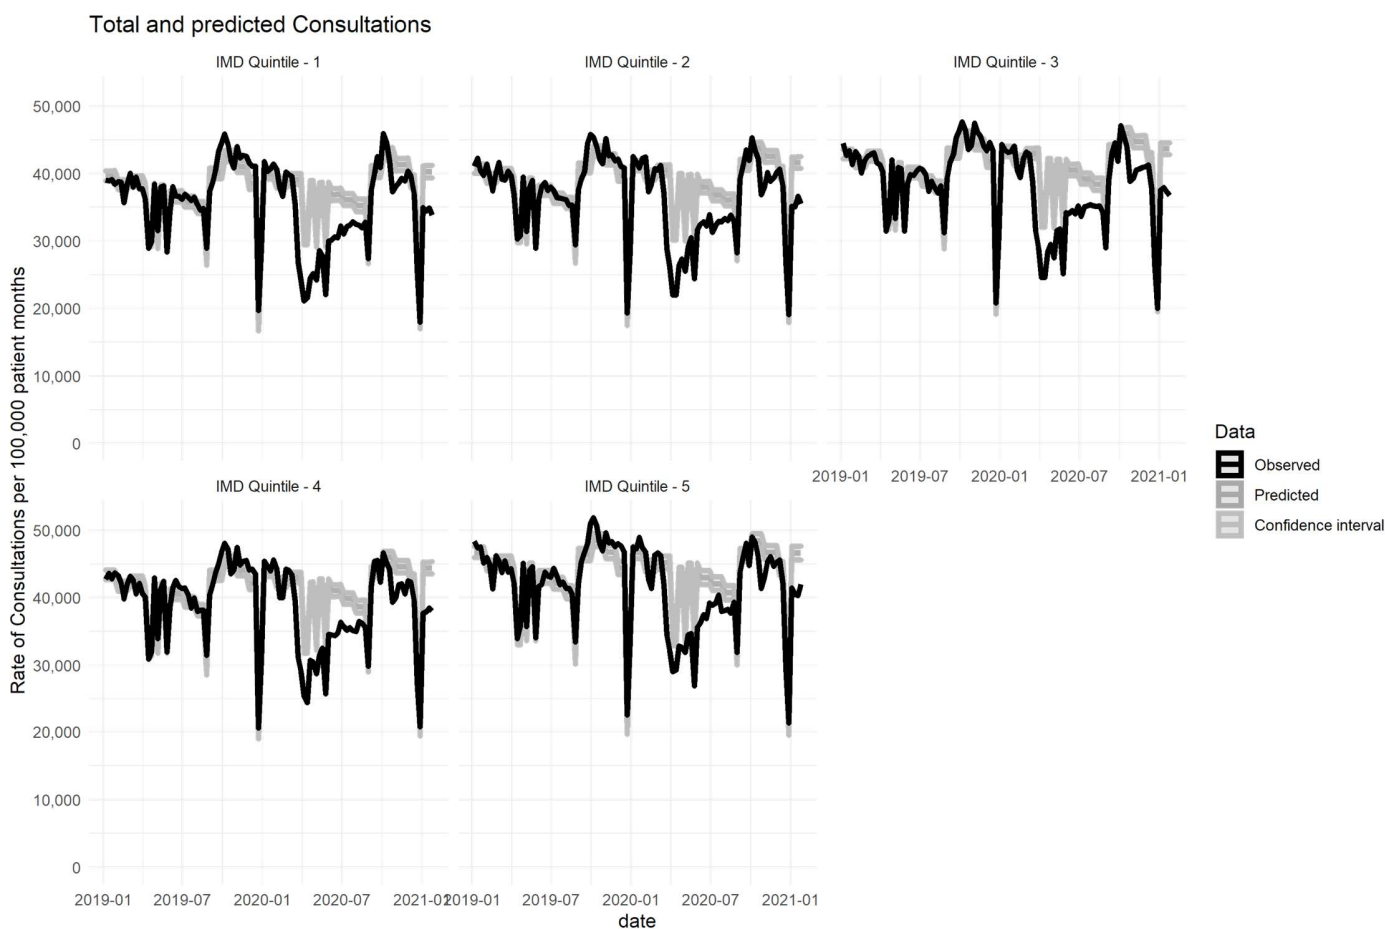

view only

## STROBE Statement—checklist of items that should be included in reports of observational studies

|                              | Item No | Recommendation                                                                                                                                                                                                                                                                                                                                                                                                                                                         | Page No |
|------------------------------|---------|------------------------------------------------------------------------------------------------------------------------------------------------------------------------------------------------------------------------------------------------------------------------------------------------------------------------------------------------------------------------------------------------------------------------------------------------------------------------|---------|
| <b>Title and abstract</b>    | 1       | (a) Indicate the study's design with a commonly used term in the title or the abstract                                                                                                                                                                                                                                                                                                                                                                                 | 2       |
|                              |         | (b) Provide in the abstract an informative and balanced summary of what was done and what was found                                                                                                                                                                                                                                                                                                                                                                    | 2       |
| <b>Introduction</b>          |         |                                                                                                                                                                                                                                                                                                                                                                                                                                                                        |         |
| Background/rationale         | 2       | Explain the scientific background and rationale for the investigation being reported                                                                                                                                                                                                                                                                                                                                                                                   | 3       |
| Objectives                   | 3       | State specific objectives, including any prespecified hypotheses                                                                                                                                                                                                                                                                                                                                                                                                       | 3       |
| <b>Methods</b>               |         |                                                                                                                                                                                                                                                                                                                                                                                                                                                                        |         |
| Study design                 | 4       | Present key elements of study design early in the paper                                                                                                                                                                                                                                                                                                                                                                                                                | 4       |
| Setting                      | 5       | Describe the setting, locations, and relevant dates, including periods of recruitment, exposure, follow-up, and data collection                                                                                                                                                                                                                                                                                                                                        | 4       |
| Participants                 | 6       | (a) <i>Cohort study</i> —Give the eligibility criteria, and the sources and methods of selection of participants. Describe methods of follow-up<br><i>Case-control study</i> —Give the eligibility criteria, and the sources and methods of case ascertainment and control selection. Give the rationale for the choice of cases and controls<br><i>Cross-sectional study</i> —Give the eligibility criteria, and the sources and methods of selection of participants | 4       |
|                              |         | (b) <i>Cohort study</i> —For matched studies, give matching criteria and number of exposed and unexposed<br><i>Case-control study</i> —For matched studies, give matching criteria and the number of controls per case                                                                                                                                                                                                                                                 |         |
| Variables                    | 7       | Clearly define all outcomes, exposures, predictors, potential confounders, and effect modifiers. Give diagnostic criteria, if applicable                                                                                                                                                                                                                                                                                                                               | 4/5     |
| Data sources/<br>measurement | 8*      | For each variable of interest, give sources of data and details of methods of assessment (measurement). Describe comparability of assessment methods if there is more than one group                                                                                                                                                                                                                                                                                   | 4/5     |
| Bias                         | 9       | Describe any efforts to address potential sources of bias                                                                                                                                                                                                                                                                                                                                                                                                              | 5/6     |
| Study size                   | 10      | Explain how the study size was arrived at                                                                                                                                                                                                                                                                                                                                                                                                                              | 4       |
| Quantitative variables       | 11      | Explain how quantitative variables were handled in the analyses. If applicable, describe which groupings were chosen and why                                                                                                                                                                                                                                                                                                                                           | 4-6     |
| Statistical methods          | 12      | (a) Describe all statistical methods, including those used to control for confounding                                                                                                                                                                                                                                                                                                                                                                                  | 5/6     |
|                              |         | (b) Describe any methods used to examine subgroups and interactions                                                                                                                                                                                                                                                                                                                                                                                                    | 5/6     |
|                              |         | (c) Explain how missing data were addressed                                                                                                                                                                                                                                                                                                                                                                                                                            | 4-6     |
|                              |         | (d) <i>Cohort study</i> —If applicable, explain how loss to follow-up was addressed<br><i>Case-control study</i> —If applicable, explain how matching of cases and controls was addressed<br><i>Cross-sectional study</i> —If applicable, describe analytical methods taking account of sampling strategy                                                                                                                                                              | N/A     |
|                              |         | (e) Describe any sensitivity analyses                                                                                                                                                                                                                                                                                                                                                                                                                                  | 4-6     |

Continued on next page



| <b>Results</b>           |     |                                                                                                                                                                                                              |      |
|--------------------------|-----|--------------------------------------------------------------------------------------------------------------------------------------------------------------------------------------------------------------|------|
| Participants             | 13* | (a) Report numbers of individuals at each stage of study—eg numbers potentially eligible, examined for eligibility, confirmed eligible, included in the study, completing follow-up, and analysed            | 4/5  |
|                          |     | (b) Give reasons for non-participation at each stage                                                                                                                                                         | N/A  |
|                          |     | (c) Consider use of a flow diagram                                                                                                                                                                           | N/A  |
| Descriptive data         | 14* | (a) Give characteristics of study participants (eg demographic, clinical, social) and information on exposures and potential confounders                                                                     | 6-8  |
|                          |     | (b) Indicate number of participants with missing data for each variable of interest                                                                                                                          | 6-8  |
|                          |     | (c) <i>Cohort study</i> —Summarise follow-up time (eg, average and total amount)                                                                                                                             | N/A  |
| Outcome data             | 15* | <i>Cohort study</i> —Report numbers of outcome events or summary measures over time                                                                                                                          | 6/7  |
|                          |     | <i>Case-control study</i> —Report numbers in each exposure category, or summary measures of exposure                                                                                                         | N/A  |
|                          |     | <i>Cross-sectional study</i> —Report numbers of outcome events or summary measures                                                                                                                           | N/A  |
| Main results             | 16  | (a) Give unadjusted estimates and, if applicable, confounder-adjusted estimates and their precision (eg, 95% confidence interval). Make clear which confounders were adjusted for and why they were included | 6-8  |
|                          |     | (b) Report category boundaries when continuous variables were categorized                                                                                                                                    | N/A  |
|                          |     | (c) If relevant, consider translating estimates of relative risk into absolute risk for a meaningful time period                                                                                             | N/A  |
| Other analyses           | 17  | Report other analyses done—eg analyses of subgroups and interactions, and sensitivity analyses                                                                                                               | 6-8  |
| <b>Discussion</b>        |     |                                                                                                                                                                                                              |      |
| Key results              | 18  | Summarise key results with reference to study objectives                                                                                                                                                     | 9    |
| Limitations              | 19  | Discuss limitations of the study, taking into account sources of potential bias or imprecision. Discuss both direction and magnitude of any potential bias                                                   | 9/10 |
| Interpretation           | 20  | Give a cautious overall interpretation of results considering objectives, limitations, multiplicity of analyses, results from similar studies, and other relevant evidence                                   | 10   |
| Generalisability         | 21  | Discuss the generalisability (external validity) of the study results                                                                                                                                        | 9/10 |
| <b>Other information</b> |     |                                                                                                                                                                                                              |      |
| Funding                  | 22  | Give the source of funding and the role of the funders for the present study and, if applicable, for the original study on which the present article is based                                                | 1    |

\*Give information separately for cases and controls in case-control studies and, if applicable, for exposed and unexposed groups in cohort and cross-sectional studies.

**Note:** An Explanation and Elaboration article discusses each checklist item and gives methodological background and published examples of transparent reporting. The STROBE checklist is best used in conjunction with this article (freely available on the Web sites of PLoS Medicine at <http://www.plosmedicine.org/>, Annals of Internal Medicine at <http://www.annals.org/>, and Epidemiology at <http://www.epidem.com/>). Information on the STROBE Initiative is available at [www.strobe-statement.org](http://www.strobe-statement.org).
